# Supplementary material for: Efficient synthesis of diverse hetero-bis-metallated alkenes as modular reagents towards highly conjugated and isolated olefinic systems
Source: Royal Society of Chemistry journal article supplement (doi:10.1039/c2cc34052f), 2012-01-01

## Electronic Supplementary Information (ESI)

### Efficient synthesis of diverse hetero-bis-metallated alkenes as modular reagents towards highly conjugated and isolated olefinic systems

Mario Altendorfer<sup>†</sup> and Dirk Menche<sup>‡,\*</sup>

<sup>†</sup> *Universität Heidelberg, Institut für Organische Chemie, INF 270, D-69120 Heidelberg, Germany and*

<sup>‡</sup> *Kekulé-Institut für Organische Chemie und Biochemie der Universität Bonn, Gerhard-Domagk-Str. 1, D-53121 Bonn, Germany.*

E-mail: [dirk.menche@uni-bonn.de](mailto:dirk.menche@uni-bonn.de)

#### Contents

|     |                                                           |     |
|-----|-----------------------------------------------------------|-----|
| I.  | Experimental Details and Characterization Data.           | S2  |
| II. | Copies of <sup>1</sup> H and <sup>13</sup> C NMR spectra. | S31 |

**General Remarks:** All reactions were performed under an atmosphere of argon in flame-dried glassware which had been cooled under argon unless stated otherwise. All flasks were equipped with rubber septa and reactants were handled using standard Schlenk techniques. Temperatures above rt (23 °C) refer to oil bath temperatures which were controlled by a temperature modulator. For cooling, the following baths were used: ethanol/liquid nitrogen (-98 °C), acetone/dry ice (-78 °C), water/ice (0 °C). All reagents, anhydrous DMF and anhydrous 1,4-dioxane were purchased from commercial suppliers (Sigma-Aldrich, Alfa Aesar, Strem) in the highest grade available and used without further purification unless otherwise stated. Anhydrous solvents (THF, diethyl ether and dichloromethane) were freshly obtained from a solvent drying system MB SPS-800. Reactions were monitored via TLC on silica gel 60 F<sub>254</sub> precoated plates (0.2 mm SiO<sub>2</sub>, Machery-Nagel) and visualized using UV light and/or staining with a solution of CAM (1 g Ce(SO<sub>4</sub>)<sub>2</sub>, 2.5 g (NH<sub>4</sub>)<sub>6</sub>Mo<sub>7</sub>O<sub>24</sub>, 8 mL conc. H<sub>2</sub>SO<sub>4</sub> in 100 mL H<sub>2</sub>O) and subsequent heating. For column chromatography, silica gel (pore size 60 Å, 40-63 μm) obtained from Aldrich was

For column chromatography, silica gel (pore size 60 Å, 40-63 µm) obtained from Aldrich was used. Solvents were distilled prior to use. Optical Rotations were measured with a Perkin Elmer 241 polarimeter in a 10 mm cuvette and are uncorrected. <sup>1</sup>H and <sup>13</sup>C NMR spectra were recorded on Bruker AC-300, DRX-300, AVB-400, DRX-500 and Avance III 600 spectrometers with <sup>13</sup>C operating frequencies of 75, 100, 125 and 150 MHz, respectively. Data for <sup>1</sup>H NMR spectra are reported as follows: chemical shift (multiplicity, coupling constants in Hertz, number of hydrogens). Abbreviations are as follows: s (singlet), d (doublet), t (triplet), q (quartet), quint (quintet), m (multiplet), br (broad). Mass spectra (MS) and High-resolution - mass spectra (HR-MS) were recorded at the Department of Organic Chemistry on the following mass spectrometers: Bruker ICR APEX-QE, Vacuum Generators ZAB-2F, Finnigan MAT TSQ 700 and JEOL JMS-700. Ionization processes and mol peaks were given.

## I. Experimental Details and Characterization Data.

### General procedure for hydrostannation of alkynes 4 and 8

Pd<sub>2</sub>dba<sub>3</sub> (4.60 mg, 5.00 µmol, 0.5 mol%), tricyclohexylphosphonium tetrafluoroborate (7.40 mg, 20.0 µmol, 2.0 mol%) and diisopropylethylamine (5.20 mg, 40.0 µmol, 4 mol%) were added successively to dry dichloromethane (10 mL) and the resulting mixture was stirred at room temperature for 10 minutes. Alkyne (1.00 mmol, 1.0 eq.) was added and the reaction mixture was cooled to 0 °C. Bu<sub>3</sub>SnH (1.20 mmol, 1.2 eq.) was diluted in dry dichloromethane (5 mL) and added dropwise via a syringe over 5 minutes. The reaction was then allowed to stir at 0 °C for 2 hours. The reaction mixture was concentrated under reduced pressure and purified by silica gel chromatography (petroleum ether/ethyl acetate, 9:1) to afford the corresponding vinylstannane.

### (*E*)-5-(tributylstannyl)prop-2-en-1-ol 5a

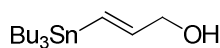

5a

The reaction was performed according to the general procedure as described above for Pd<sub>2</sub>dba<sub>3</sub> (82.0 mg, 89.0 μmol, 0.5 mol%), tricyclohexylphosphonium tetrafluoroborate (131 mg, 365 μmol, 2.0 mol%), diisopropylethylamine (92.0 mg, 712 μmol, 4 mol%) in dichloromethane (100 mL), propargyl alcohol **4a** (1.00 g, 17.8 mmol, 1.0 eq.), Bu<sub>3</sub>SnH (6.23 g, 21.4 mmol, 1.2 eq.) in dichloromethane (50 mL) to give stannane **5a** as a yellow oil (3.88 g, 11.2 mmol, 63%). R<sub>f</sub> = 0.34 (*n*-hexane/ethyl acetate, 9:1); <sup>1</sup>H NMR (300.132 MHz, CDCl<sub>3</sub>) δ = 0.90 (m, 15 H), 1.31 (dq, *J* = 14.5 Hz, *J* = 7.3 Hz, 6 H), 1.49 (m, 6 H), 4.18 (dd, *J* = 5.9 Hz, *J* = 3.2 Hz, 2 H), 6.18 (m, 2 H); <sup>13</sup>C NMR (75.48 MHz, CDCl<sub>3</sub>) δ = 9.4, 13.7, 27.3, 29.1, 66.4, 128.3, 147.0; EI MS (70 eV, *m/z*(%)): 291 ([M]<sup>+</sup>-C<sub>4</sub>H<sub>9</sub>, 100).

### (2*E*,4*E*)-5-(tributylstannyl)penta-2,4-dien-1-ol **5b**

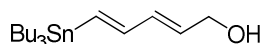

**5b**

The reaction was performed according to the general procedure as described above for Pd<sub>2</sub>dba<sub>3</sub> (5.60 mg, 6.10 μmol, 0.5 mol%), tricyclohexylphosphonium tetrafluoroborate (9.60 mg, 24.4 μmol, 2.0 mol%), diisopropylethylamine (6.36 mg, 48.8 μmol, 4.0 mol%) in dry dichloromethane (7 mL), Pent-2,4-dien-1-ol **4b** (100 mg, 1.22 mmol, 1.0 eq.), Bu<sub>3</sub>SnH (426 mg, 1.46 mmol, 1.2 eq.) in dry dichloromethane (4 mL) to give stannane **5b** as a yellow oil (273 mg, 732 μmol, 60%). R<sub>f</sub> = 0.24 (*n*-hexane/ethyl acetate, 9:1); <sup>1</sup>H NMR (300.132 MHz, CDCl<sub>3</sub>) δ = 0.90 (m, 15 H), 1.32 (dq, *J* = 14.8 Hz, *J* = 7.2 Hz, 6 H), 1.50 (m, 6 H), 4.21 (t, *J* = 5.4 Hz, 2 H), 5.80 (dt, *J* = 15.5 Hz, *J* = 5.8 Hz, 1 H), 6.26 (m, 2 H), 6.55 (dd, *J* = 18.9 Hz, *J* = 8.8 Hz, 1 H); <sup>13</sup>C NMR (75.48 MHz, CDCl<sub>3</sub>) δ = 9.5, 13.7, 27.3, 29.1, 63.3, 130.7, 134.6, 135.1, 145.9; HR-MS (EI): *m/z* = 317.0930 (C<sub>13</sub>H<sub>25</sub>OSn [M-C<sub>4</sub>H<sub>9</sub>]<sup>+</sup>), calculated *m/z* = 317.0922.

### (*E*)-5-(tributylstannyl)pent-4-en-1-ol **9a**

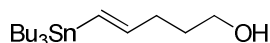

**9a**

The reaction was performed according to the general procedure as described above for Pd<sub>2</sub>dba<sub>3</sub> (9.20 mg, 0.01 mmol, 0.5 mol%), tricyclohexylphosphonium tetrafluoroborate (14.8 mg, 0.04 mmol, 2.0 mol%), diisopropylethylamine (10.4 mg, 0.08 mmol, 4.0 mol%) in dichloromethane (10 mL), Pent-4-yn-1-ol **8a** (168 mg, 2.00 mmol, 1.0 eq.), Bu<sub>3</sub>SnH (698 mg, 2.40 mmol, 1.2 eq.) in dry dichloromethane (6 mL) to give stannane **9a** as a colourless oil (675 mg, 1.80 mmol, 90%). R<sub>f</sub> = 0.31 (*n*-hexane/ethyl acetate, 8:1); <sup>1</sup>H NMR (500.130 MHz, CDCl<sub>3</sub>) δ = 0.88 (m, 15 H), 1.31 (dq, *J* = 14.8 Hz, *J* = 7.3 Hz, 6 H), 1.49 (m, 6 H), 1.69 (quint, *J* = 7.0 Hz, 2 H), 2.23 (td, *J* = 7.3 Hz, *J* = 4.8 Hz, 2 H), 3.67 (m, 2 H), 5.96 (m, 2 H); <sup>13</sup>C NMR (125.78 MHz, CDCl<sub>3</sub>) δ = 9.4, 13.7, 27.3, 29.1, 31.8, 34.1, 62.6, 128.2, 148.6; HR-MS (EI): found *m/z* = 319.1093 ([M]<sup>+</sup>-C<sub>4</sub>H<sub>9</sub>), calculated *m/z* = 319.0645.

#### (*E*)-7-(tributylstannyl)hept-6-en-1-ol **9b**

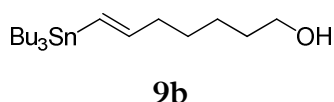

The reaction was performed according to the general procedure as described above for Pd<sub>2</sub>dba<sub>3</sub> (82.0 mg, 89.0 μmol, 0.5 mol%), tricyclohexylphosphonium tetrafluoroborate (131 mg, 365 μmol, 0.02 eq.), diisopropylethylamine (92.0 mg, 712 μmol, 0.04 eq.) in dry dichloromethane (100 mL), Hept-6-yn-1-ol **8b** (2.00 g, 17.8 mmol, 1.0 eq.), Bu<sub>3</sub>SnH (6.23 g, 21.4 mmol, 1.2 eq.) in dry dichloromethane (50 mL) to give stannane **9b** as a colourless oil (5.24 g, 13.0 mmol, 73%). R<sub>f</sub> = 0.26 (petroleum ether/ethyl acetate, 9:1); <sup>1</sup>H NMR (300.132 MHz, CDCl<sub>3</sub>) δ = 0.89 (m, 15 H), 1.46 (m, 18 H), 2.17 (m, 2 H), 3.66 (m, 2 H), 5.94 (m, 2 H); <sup>13</sup>C NMR (75.48 MHz, CDCl<sub>3</sub>) δ = 9.4, 13.7, 25.2, 27.2, 28.7, 29.1, 32.6, 37.8, 63.0, 127.3, 149.4; HR-MS (EI): *m/z* = 347.1400 (C<sub>15</sub>H<sub>31</sub>OSn [M-C<sub>4</sub>H<sub>9</sub>]<sup>+</sup>), calculated *m/z* = 347.1391.

#### (*E*)-9-(tributylstannyl)non-8-en-1-ol **9c**

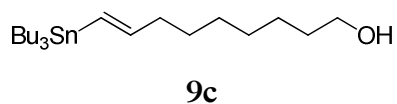

The reaction was performed according to the general procedure as described above for Pd<sub>2</sub>dba<sub>3</sub> (82.0 mg, 89.0 μmol, 0.5 mol%), tricyclohexylphosphonium tetrafluoroborate (131 mg, 365 μmol, 0.02 eq.), diisopropylethylamine (92.0 mg, 712 μmol, 0.04 eq.) in dry dichloromethane (100 mL), Non-8-yn-1-ol **8c** (2.50 g, 17.8 mmol, 1.0 eq.), Bu<sub>3</sub>SnH (6.23 g, 21.4 mmol, 1.2 eq.) in dry dichloromethane (50 mL) to give stannane **9c** as a light yellow oil (5.81 g, 13.5 mmol, 76%). *R<sub>f</sub>* = 0.28 (petroleum ether/ethyl acetate, 9:1); <sup>1</sup>H NMR (300.132 MHz, CDCl<sub>3</sub>) δ = (m, 15 H), 1.43 (m, 22 H), 2.13 (m, 2 H), 3.64 (m, 2 H), 5.91 (m, 2 H); <sup>13</sup>C NMR (75.48 MHz, CDCl<sub>3</sub>) δ = 9.4, 13.7, 25.7, 27.3, 28.8, 29.1, 29.1, 29.3, 32.8, 37.8, 63.1, 127.1, 149.7; HR-MS (EI): *m/z* = 375.1713 (C<sub>17</sub>H<sub>35</sub>OSn [M-C<sub>4</sub>H<sub>9</sub>]<sup>+</sup>), calculated *m/z* = 375.1704.

### General procedure for the oxidation of allylic alcohols **5**

Activated MnO<sub>2</sub> (1.48 g, 17.0 mmol, 17 eq) was suspended in dichloromethane (10 mL). Allylic alcohol (1.00 mmol, 1 eq) in dichloromethane (6 mL) was added at room temperature and the mixture was stirred for 2 h. The mixture was filtered through a short pad of celite with dichloromethane (30 mL) and ethyl acetate (50 mL). The solvent was evaporated under reduced pressure. The resulting residue was purified by column chromatography on silica gel (petroleum ether/ethyl acetate; 12:1) to afford the corresponding aldehyde.

### (*E*)-3-(tributylstannyl)acrylaldehyde **6a**

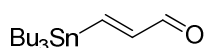

**6a**

The reaction was performed according to the general procedure as described above for, MnO<sub>2</sub> (8.52 g, 97.9 mmol, 17 eq) in dichloromethane (55 mL), (*E*)-5-(tributylstannyl)prop-2-en-1-ol **5a** (2.00 g, 5.76 mmol, 1 eq) in dichloromethane (35 mL) to give the aldehyde **6a** (1.76 g, 5.07 mmol, 88%) as a yellow oil. *R<sub>f</sub>* = 0.75 (*n*-hexane/ethyl acetate; 10:1); <sup>1</sup>H NMR (300.132 MHz, CDCl<sub>3</sub>): δ = 0.90 (m, 10 H), 1.02 (m, 5 H), 1.32 (dq, *J* = 14.8 Hz, *J* = 7.2 Hz, 6 H), 1.53 (m, 6 H), 6.63 (dd, *J* = 19.2 Hz, *J* = 7.5 Hz, 1 H), 7.80 (d, *J* = 19.2 Hz, 1 H), 9.42 (d, *J* = 7.5 Hz, 1 H); <sup>13</sup>C NMR (75.48 MHz, CDCl<sub>3</sub>): δ = 10.2, 14.0, 27.6, 29.4, 148.0, 163.7, 194.1; HR-MS (EI<sup>+</sup>): found *m/z* = 289.0623 (C<sub>11</sub>H<sub>21</sub>OSn [M-C<sub>4</sub>H<sub>9</sub>]<sup>+</sup>), calculated *m/z* = 289.0176.

### (2*E*,4*E*)-5-(tributylstannyl)penta-2,4-dienal **6b**

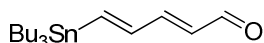

**6b**

The reaction was performed according to the general procedure as described above for MnO<sub>2</sub> (198 g, 2.28 mmol, 17 eq) in dichloromethane (1.5 mL), (2*E*,4*E*)-5-(tributylstannyl)penta-2,4-dien-1-ol **5b** (50.0 mg, 134 μmol, 1.0 eq) in dichloromethane (0.5 mL) to give the aldehyde **6b** (42.7 mg, 115 μmol, 86%) as a yellow oil. *R*<sub>f</sub> = 0.43 (*n*-pentane/diethyl ether, 100:5); <sup>1</sup>H NMR (300.132 MHz, CDCl<sub>3</sub>) δ = 0.94 (m, 15 H), 1.33 (dq, *J* = 14.6 Hz, *J* = 7.2 Hz, 6 H), 1.54 (m, 6 H), 6.07 (dd, *J* = 15.1 Hz, *J* = 8.0 Hz, 1 H), 6.80 (m, 1 H), 7.02 (m, 2 H), 9.58 (d, *J* = 8.0 Hz, 1 H); <sup>13</sup>C NMR (75.48 MHz, CDCl<sub>3</sub>) δ = 9.7, 13.7, 27.2, 29.0, 130.1, 144.2, 151.4, 153.5, 194.4; HR-MS (EI): found *m/z* = 315.0773 (C<sub>13</sub>H<sub>23</sub>OSn [M-C<sub>4</sub>H<sub>9</sub>]<sup>+</sup>), calculated *m/z* = 317.0765.

### General procedure for the oxidation of alcohols **9**

To a solution of alcohol (1.00 mmol, 1.0 eq.) in dichloromethane (25 mL) was added a spatula load of dried 4 Å powdered molecular sieves, followed by NMO (351 mg, 3.00 mmol, 3.0 eq.) and TPAP (35.1 mg, 0.10 μmol, 0.1 eq.). The reaction mixture was stirred at 0 °C for 30 min then directly purified by flash chromatography (SiO<sub>2</sub>, petroleum ether/ ethyl acetate, 20:1), yielding the corresponding aldehyde.

### (*E*)-5-(tributylstannyl)pent-4-enal **10a**

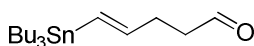

**10a**

The reaction was performed according to the general procedure as described above for (*E*)-5-(tributylstannyl)pent-4-enol **9a** (50.0 mg, 133 μmol, 1.0 eq.) in dichloromethane (3 mL), NMO (40.8 mg, 400 μmol, 3.0 eq.) and TPAP (4.60 mg, 13.3 μmol, 0.1 eq.) yielding the desired aldehyde **10a** (39.8 mg, 107 μmol, 80%) as a colourless oil. *R*<sub>f</sub> = 0.73 (petroleum ether/ethyl acetate, 10:1); <sup>1</sup>H NMR (300.132 MHz, CDCl<sub>3</sub>) δ = 0.88 (m, 15 H), 1.30 (m, 6 H), 1.49 (m, 6 H), 2.51 (m, 4 H), 5.97 (m, 2 H), 9.78 (t, *J* = 1.6 Hz, 1 H); <sup>13</sup>C NMR (75.48 MHz,

$\text{CDCl}_3$ )  $\delta = 9.4, 13.7, 27.2, 29.1, 29.9, 42.7, 129.2, 146.3, 202.3$ ; HR-MS (EI): found  $m/z = 317.0947$  ( $\text{C}_{13}\text{H}_{25}\text{OSn} [\text{M}-\text{C}_4\text{H}_9]^+$ ), calculated  $m/z = 317.0489$ .

**(*E*)-7-(tributylstannyl)hept-6-enal 10b**

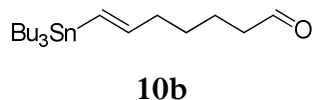

The reaction was performed according to the general procedure as described above for (*E*)-7-(tributylstannyl)hept-6-en-1-ol **9b** (50.0 mg, 124  $\mu\text{mol}$ , 1.0 eq.) in dichloromethane (3 mL), NMO (43.6 mg, 371  $\mu\text{mol}$ , 3.0 eq.) and TPAP (4.40 mg, 12.4  $\mu\text{mol}$ , 0.1 eq.) yielding the desired aldehyde **10b** (40.3 mg, 100  $\mu\text{mol}$ , 81%) as a colourless liquid.  $R_f = 0.60$  (*n*-hexane/ethyl acetate, 9:1);  $^1\text{H NMR}$  (300.132 MHz,  $\text{CDCl}_3$ )  $\delta = 0.88$  (m, 15 H), 1.31 (dq,  $J = 14.6$  Hz,  $J = 7.2$  Hz, 6 H), 1.57 (m, 8 H), 2.17 (td,  $J = 7.4$  Hz,  $J = 4.4$  Hz, 2 H), 2.44 (td,  $J = 7.3$  Hz,  $J = 1.8$  Hz, 2 H), 5.86 (m, 2 H), 9.77 (t,  $J = 1.9$  Hz, 1 H);  $^{13}\text{C NMR}$  (75.48 MHz,  $\text{CDCl}_3$ )  $\delta = 9.4, 13.7, 21.6, 27.3, 28.3, 29.1, 37.4, 43.8, 128.0, 148.7, 202.7$ ; HR-MS (ESI):  $m/z = 425.1841$  ( $\text{C}_{19}\text{H}_{38}\text{OSnNa}$ ), calculated  $m/z = 425.1840$ .

**(*E*)-9-(tributylstannyl)non-8-enal 10c**

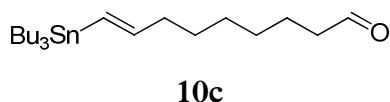

The reaction was performed according to the general procedure as described above for (*E*)-7-(tributylstannyl)non-8-en-1-ol **9c** (50.0 mg, 116  $\mu\text{mol}$ , 1.0 eq.) in dichloromethane (3 mL), NMO (40.8 mg, 348  $\mu\text{mol}$ , 3.0 eq.) and TPAP (4.10 mg, 11.6  $\mu\text{mol}$ , 0.1 eq.) yielding the desired aldehyde **10c** (40.7 mg, 94.8  $\mu\text{mol}$ , 82%) as a colourless liquid.  $R_f = 0.60$  (*n*-hexane/ethyl acetate, 9:1);  $^1\text{H NMR}$  (300.132 MHz,  $\text{CDCl}_3$ )  $\delta = 0.88$  (m, 15 H), 1.47 (m, 20 H), 2.13 (m, 2 H), 2.42 (td,  $J = 7.3$  Hz,  $J = 1.8$  Hz, 2 H), 5.89 (m, 2 H), 9.77 (t,  $J = 1.8$  Hz, 1 H);  $^{13}\text{C NMR}$  (75.48 MHz,  $\text{CDCl}_3$ )  $\delta = 9.4, 13.7, 22.0, 27.3, 28.6, 28.8, 29.0, 29.1, 37.7, 43.9, 127.3, 149.5, 202.8$ ; HR-MS (ESI):  $m/z = 453.2153$  ( $\text{C}_{21}\text{H}_{42}\text{OSnNa}$ ), calculated  $m/z = 453.2153$ .

## General procedure for the Boryl-Takai olefination of aldehydes **6** and **10**

The following process was conducted in the dark. A solution of aldehyde (1.00 mmol, 1.0 eq) and dioxaborolane **7** (422 mg, 2.00 mmol, 2.0 eq) in THF (8.5 mL) was added via syringe to a mixture of anhydrous chromium(II) chloride (983 mg, 8.00 mmol, 8 eq) in THF (8.5 mL). A solution of lithium iodide (535 mg, 4.00 mmol, 4.0 eq) in THF (8.5 mL) was added via syringe and the reaction mixture was stirred at 25 °C for 12 h. The reaction was quenched by the addition of water. The organic layer was separated and the aqueous layer was extracted with Et<sub>2</sub>O (3 x 10 mL). The combined organic extracts were washed with brine (2 x 20 mL), dried with Na<sub>2</sub>SO<sub>4</sub>, filtered and concentrated under reduced pressure. The residue was passed through a pad of celite and the filter cake was washed thoroughly with Et<sub>2</sub>O. After concentration of the residue the crude product was purified by chromatography (SiO<sub>2</sub>, petroleum ether/diethyl ether, 100:1) to afford the corresponding pinacolborane.

### Tributyl((1*E*,3*E*)-4-(4,4,5,5-tetramethyl-1,3,2 dioxaborolan 2 yl)buta-1,3-dienyl)-stannane **2a**

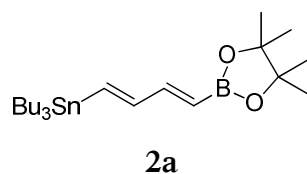

The reaction was performed according to the general procedure as described above for (*E*)-3-(tributylstannyl) acrylaldehyde **6a** (200 mg, 0.58 mmol, 1.0 eq) and 2-(dichloromethyl-4,4,5,5-tetramethyl-1,3,2-dioxaborolane **7** (244 mg, 1.16 mmol, 2.0 eq) in THF (5 mL), anhydrous chromium(II) chloride (548 mg, 4.46 mmol, 8 eq) in THF (5 mL), lithium iodide (298 mg, 2.23 mmol, 4.0 eq) in THF (5 mL) to afford the conjugated diene **2a** (260 mg, 550 μmol, 75%) as a green-clear liquid. *R*<sub>f</sub> = 0.48 (*n*-hexane/ethyl acetate, 100:5); <sup>1</sup>H NMR (300.132 MHz, CDCl<sub>3</sub>): δ = 0.91 (m, 15 H), 1.30 (m, 18 H), 1.50 (m, 6 H), 5.48 (d, *J* = 17.5 Hz, 1 H), 6.52 (m, 2 H), 6.97 (dd, *J* = 17.6 Hz, *J* = 9.0 Hz, 1 H); <sup>13</sup>C NMR (75.48 MHz, CDCl<sub>3</sub>): δ = 9.1, 13.3, 24.3, 24.5, 26.8, 28.6, 82.7, 140.0, 148.1, 151.8; HR-MS (EI): found *m/z* = 413.1687 C<sub>18</sub>H<sub>44</sub>BO<sub>2</sub>Sn ([M-C<sub>4</sub>H<sub>9</sub>]<sup>+</sup>), calculated *m/z* = 413.1235.



**Tributyl((1*E*,3*E*,5*E*)-6-(4,4,5,5-tetramethyl-1,3,2-dioxaborolan-2-yl)hexa-1,3,5-trien-1-yl)stannane **2b****

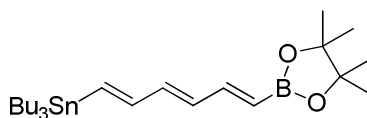

**2b**

The reaction was performed according to the general procedure as described above for (2*E*,4*E*)-5-(tributylstannyl)penta-2,4-dienal **6b** (531 mg, 1.43 mmol, 1.0 eq) and 2-(dichloromethyl-4,4,5,5-tetramethyl-1,3,2-dioxaborolane **7** (603 mg, 2.86 mmol, 2.0 eq) in THF (11 mL), anhydrous chromium chloride (1.41 g, 11.4 mmol, 8.0 eq) in THF (11 mL), lithium iodide (766 mg, 5.72 mmol, 4.0 eq) in THF (11 mL) to afford triene **2b** (526 mg, 1.06 mmol, 74%) as an orange oil.  $R_f = 0.57$  (*n*-hexane/diethyl ether, 100:1);  $^1\text{H NMR}$  (300.132 MHz,  $\text{CDCl}_3$ ):  $\delta = 0.92$  (m, 15 H), 1.43 (m, 24 H), 5.58 (d,  $J = 17.6$  Hz, 1 H), 6.31 (m, 3 H), 6.60 (m, 1 H), 7.04 (dd,  $J = 17.6$  Hz,  $J = 9.9$  Hz, 1 H);  $^{13}\text{C NMR}$  (100.61 MHz,  $\text{CDCl}_3$ ):  $\delta = 9.6, 13.7, 24.8, 26.6, 27.3, 29.1, 83.2, 133.1, 138.6, 138.9, 146.5, 149.8$ ; HR-MS (EI): found  $m/z = 439.1838$   $\text{C}_{20}\text{H}_{46}\text{BO}_2\text{Sn}$  ( $[\text{M}-\text{C}_4\text{H}_9]^+$ ), calculated  $m/z = 439.1825$ .

**Tributyl((1*E*,5*E*)-6-(4,4,5,5-tetramethyl-1,3,2-dioxaborolan-2-yl)hexa-1,5-dienyl)stannane **3a****

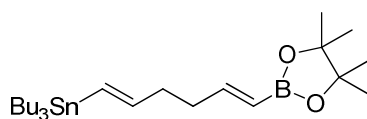

**3a**

The reaction was performed according to the general procedure as described above for (*E*)-5-(tributylstannyl)pent-4-enal **10a** (715 mg, 1.92 mmol, 1.0 eq) and 2-(dichloromethyl-4,4,5,5-tetramethyl-1,3,2-dioxaborolane **7** (810 mg, 3.84 mmol, 2.0 eq) in THF (12 mL), anhydrous chromium(II) chloride (1.89 g, 15.4 mmol, 8.0 eq) in THF (12 mL), lithium iodide (1.03 g, 7.68 mmol, 4.0 eq) in THF (12 mL) to afford diene **3a** (740 mg, 1.49  $\mu\text{mol}$ , 76%) as a colourless oil.  $R_f = 0.38$  (*n*-hexane/diethyl ether, 100:5);  $^1\text{H NMR}$  (300.132 MHz,  $\text{CDCl}_3$ ):  $\delta = 0.87$  (m, 15 H), 1.30 (m, 18 H), 1.50 (m, 6 H), 2.26 (m, 4 H),

5.45 (d,  $J = 17.9$  Hz, 1 H), 5.94 (m,  $J = 5.5$  Hz,  $J = 18.8$  Hz, 2 H), 6.65 (d,  $J = 17.9$  Hz, 1 H);  $^{13}\text{C}$  NMR (75.48 MHz,  $\text{CDCl}_3$ ):  $\delta = 9.0, 13.3, 24.3, 26.8, 28.7, 34.8, 35.8, 82.6, 127.3, 148.0, 153.5$ . HR-MS (ESI): found  $m/z = 521.2578$  ( $\text{C}_{24}\text{H}_{47}\text{BO}_2\text{SnNa}$ ), calculated  $m/z = 521.2589$ .

**Tributyl((1*E*,7*E*)-8-(4,4,5,5-tetramethyl-1,3,2-dioxaborolan-2-yl)octa-1,7-dien-1-yl)stannane **3b****

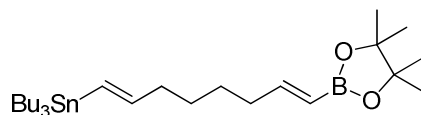

**3b**

The reaction was performed according to the general procedure as described above for (*E*)-7-(tributylstannyl)hept-6-enal **10b** (317 mg, 790  $\mu\text{mol}$ , 1.0 eq) and 2-(dichloromethyl-4,4,5,5-tetramethyl-1,3,2-dioxaborolane **7** (333 mg, 1.58 mmol, 2.0 eq) in THF (6 mL), anhydrous chromium chloride (777 mg, 6.43 mmol, 8.0 eq) in THF (6 mL), lithium iodide (432 mg, 3.16 mmol, 4.0 eq) in THF (6 mL) to afford diene **3b** (404 mg, 769  $\mu\text{mol}$ , 97%) as a colourless liquid.  $R_f = 0.66$  (petroleum ether/ethyl acetate, 100:5);  $^1\text{H}$  NMR (300.132 MHz,  $\text{CDCl}_3$ ):  $\delta = 0.86$  (m, 15 H), 1.43 (m, 28 H), 2.13 (m, 4 H), 4.96 (m, 1 H), 5.43 (dt,  $J = 17.8$  Hz,  $J = 1.5$  Hz, 1 H), 5.83 (m, 1 H), 6.63 (dt,  $J = 18.0$  Hz,  $J = 6.5$  Hz, 1 H);  $^{13}\text{C}$  NMR (75.48 MHz,  $\text{CDCl}_3$ ):  $\delta = 9.4, 13.7, 24.4, 24.8, 27.3, 28.4, 29.0, 29.1, 33.6, 35.6, 37.7, 83.0, 114.3, 127.2, 138.9, 149.4, 154.5$ ; HR-MS (ESI):  $m/z = 565.2641$  ( $\text{C}_{26}\text{H}_{51}\text{BO}_2\text{SnK}$ ), calculated  $m/z = 565.2643$ .

**Tributyl((1*E*,9*E*)-10-(4,4,5,5-tetramethyl-1,3,2-dioxaborolan-2-yl)deca-1,9-dien-1-yl)stannane **3c****

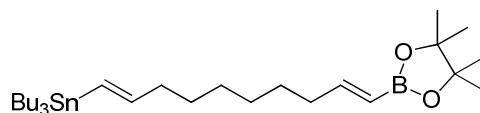

**3c**

The reaction was performed according to the general procedure as described above for (*E*)-9-(tributylstannyl)non-8-enal **10c** (35.0 mg, 81.5  $\mu\text{mol}$ , 1.0 eq) and 2-(dichloromethyl-4,4,5,5-

tetramethyl-1,3,2-dioxaborolane **7** (34.4 mg, 163 μmol, 2.0 eq) in THF (1 mL), anhydrous chromium(II) chloride (80.1 mg, 652 μmol, 8.0 eq) in THF (1 mL), lithium iodide (43.6 mg, 326 μmol, 4.0 eq) in THF (1 mL) to afford diene **3c** as a colourless oil (40.1 mg, 72.5 μmol, 89%).  $R_f = 0.64$  (petroleum ether/ethyl acetate, 10:1);  $^1\text{H NMR}$  (300.132 MHz,  $\text{CDCl}_3$ )  $\delta = 0.85$  (m, 15 H), 1.38 (m, 32 H), 2.14 (m, 4 H), 5.43 (d,  $J = 17.9$  Hz, 1 H), 5.90 (m, 2 H), 6.64 (dt,  $J = 17.9, 6.4$  Hz, 1 H);  $^{13}\text{C NMR}$  (75.48 MHz,  $\text{CDCl}_3$ ):  $\delta = 9.4, 13.7, 24.8, 27.3, 27.5, 28.2, 28.8, 28.9, 29.1, 29.1, 35.8, 37.9, 83.0, 114.1, 127.0, 149.8, 154.8$ ; HR-MS (ESI):  $m/z = 425.1841$  ( $\text{C}_{28}\text{H}_{55}\text{BO}_2\text{SnK}$ ), calculated  $m/z = 425.1840$ .

### General procedure for the Stille coupling reactions of vinylstannanes **2** and **3**

The following process was executed in the dark and conducted in an amber glass septum vial.  $\text{PdCl}_2(\text{CH}_3\text{CN})_2$  (2.60 mg, 10.0 μmol, 5 mol%) was added to a solution of 2-Acetyl-5-iodothiophene **11** (25.2 mg, 100 μmol, 1.0 eq.) and the stannane **2** or **3** (200 μmol, 2.0 eq.) in degassed, anhydrous DMF (400 μL). After stirring for 1-2 h the reaction mixture was diluted with diethyl ether (3 mL) and washed with a concentrated aqueous solution of  $\text{NH}_4\text{Cl}$  (4 mL). The organic phase was separated and the aqueous phase was extracted with diethyl ether (3 x 5 mL). The combined organic extracts were dried over  $\text{MgSO}_4$ , filtered and concentrated under reduced pressure. Purification by column chromatography ( $\text{SiO}_2$ , petroleum ether/ethyl acetate, 10:1) afforded the product **12** or **14**.

### 1-(5-((1*E*,3*E*)-4-(4,4,5,5-tetramethyl-1,3,2-dioxaborolan-2-yl)buta-1,3-dien-1-yl)thiophen-2-yl)ethanone **12a**

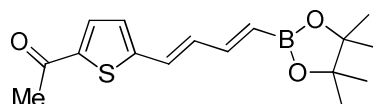

**12a**

The reaction was performed according to the general procedure as described above for  $\text{PdCl}_2(\text{CH}_3\text{CN})_2$  (2.80 mg, 10.7 μmol, 5 mol%), 2-Acetyl-5-iodothiophene **11** (36.0 mg, 142 μmol, 1.0 eq.) and stannane **2a** (100 mg, 213 μmol, 1.5 eq.) in degassed, anhydrous DMF (400 μL) to afford the product **12a** (42.3 mg, 139 μmol, 98%) as a yellow oil with little impurities of  $\text{Bu}_3\text{SnI}$ .  $R_f = 0.16$  (petroleum ether/ethyl acetate, 10:1);  $^1\text{H NMR}$  (300.132 MHz,

$\text{CDCl}_3$ )  $\delta$  = 1.29 (s, 12 H), 2.53 (s, 3 H), 5.75 (d,  $J$  = 17.6 Hz, 1 H), 6.77 (m, 2 H), 7.03 (d,  $J$  = 3.8 Hz, 1 H), 7.09 (s, 1 H), 7.56 (d,  $J$  = 3.8 Hz, 1 H);  $^{13}\text{C}$  NMR (75.48 MHz,  $\text{CDCl}_3$ ):  $\delta$  = 24.8, 26.6, 83.4, 127.3, 133.0, 133.6, 143.0, 148.1, 150.0, 190.3; HR-MS (ESI):  $m/z$  = 327.1196 ( $\text{C}_{16}\text{H}_{21}\text{B}_0\text{S}_3\text{Na}$ ), calculated  $m/z$  = 327.1197.

**1-(5-((1*E*,3*E*,5*E*)-6-(4,4,5,5-tetramethyl-1,3,2-dioxaborolan-2-yl)hexa-1,3,5-trien-1-yl)thiophen-2-yl)ethanone 12b**

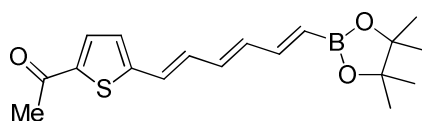

**12b**

The reaction was performed according to the general procedure as described above for  $\text{PdCl}_2(\text{CH}_3\text{CN})_2$  (875  $\mu\text{g}$ , 3.37  $\mu\text{mol}$ , 5 mol%), 2-Acetyl-5-iodothiophene **11** (17.0 mg, 67.3  $\mu\text{mol}$ , 1.0 eq.) and stannane **2b** (50.0 mg, 101  $\mu\text{mol}$ , 1.5 eq.) in degassed, anhydrous DMF (300  $\mu\text{L}$ ). to afford the triene **12b** (19.2 mg, 58.1  $\mu\text{mol}$ , 86%) as a dark red solid with little impurities of  $\text{Bu}_3\text{SnI}$ .  $R_f$  = 0.16 (petroleum ether/ethyl acetate, 10:1);  $^1\text{H}$  NMR (300.132 MHz,  $\text{CDCl}_3$ )  $\delta$  = 1.29 (s, 12 H), 2.53 (s, 3 H), 5.67 (d,  $J$  = 17.6 Hz, 1 H), 6.47 (m, 1 H), 6.70 (m, 1 H), 6.81 (m, 1 H), 7.00 (d,  $J$  = 3.9 Hz, 1 H), 7.07 (m, 1 H), 7.55 (d,  $J$  = 4.0 Hz, 1 H);  $^{13}\text{C}$  NMR (75.48 MHz,  $\text{CDCl}_3$ ):  $\delta$  = 24.8, 26.6, 26.9, 83.4, 126.3, 126.7, 131.9, 133.2, 135.0, 136.9, 142.6, 148.9, 150.6, 190.3; HR-MS (ESI):  $m/z$  = 305.1377 ( $\text{C}_{16}\text{H}_{22}\text{B}_0\text{S}_3$ ), calculated  $m/z$  = 305.1380.

**1-(5-((1*E*,5*E*)-6-(4,4,5,5-tetramethyl-1,3,2-dioxaborolan-2-yl)hexa-1,5-dien-1-yl)thiophen-2-yl)ethanone 14a**

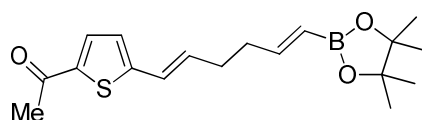

**14a**

The reaction was performed according to the general procedure as described above for  $\text{PdCl}_2(\text{CH}_3\text{CN})_2$  (521  $\mu\text{g}$ , 2.01  $\mu\text{mol}$ , 5 mol%), 2-Acetyl-5-iodothiophene **11** (10.1 mg,

40.2  $\mu\text{mol}$ , 1.0 eq.) and stannane **3a** (30.0 mg, 60.3  $\mu\text{mol}$ , 1.5 eq.) in degassed, anhydrous DMF (200  $\mu\text{L}$ ) to afford the diene **14a** (12.6 mg, 37.8  $\mu\text{mol}$ , 94%) as a yellow oil.  $R_f = 0.19$  (petroleum ether/ethyl acetate, 10:1);  $^1\text{H NMR}$  (300.132 MHz,  $\text{CDCl}_3$ ):  $\delta = 1.27$  (s, 12 H), 2.34 (m, 4 H), 2.51 (s, 3 H), 5.49 (d,  $J = 18.1$  Hz, 1 H), 6.28 (d,  $J = 15.6$  Hz, 1 H), 6.50 (m, 1 H), 6.64 (d,  $J = 17.8$  Hz, 1 H), 6.88 (d,  $J = 3.8$  Hz, 1 H), 7.53 (d,  $J = 3.8$  Hz, 1 H);  $^{13}\text{C NMR}$  (75.48 MHz,  $\text{CDCl}_3$ ):  $\delta = 24.8, 26.5, 31.5, 34.8, 83.1, 123.2, 125.1, 133.0, 134.2, 141.5, 151.2, 152.6, 190.3$ ; HR-MS (ESI):  $m/z = 333.1691$  ( $\text{C}_{18}\text{H}_{26}\text{B}_0\text{S}$ ), calculated  $m/z = 333.1693$ .

**1-(5-((1E,7E)-8-(4,4,5,5-tetramethyl-1,3,2-dioxaborolan-2-yl)octa-1,7-dien-1-yl)thiophen-2-yl)ethanone 14b**

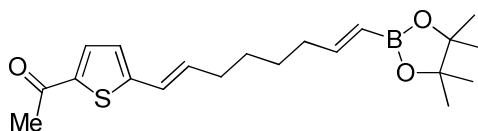

**14b**

The reaction was performed according to the general procedure as described above for  $\text{PdCl}_2(\text{CH}_3\text{CN})_2$  (824  $\mu\text{g}$ , 3.16  $\mu\text{mol}$ , 5 mol%), 2-Acetyl-5-iodothiophene **11** (16.0 mg, 63.5  $\mu\text{mol}$ , 1.0 eq.) and stannane **3b** (50 mg, 95.2  $\mu\text{mol}$ , 1.5 eq.) in degassed, anhydrous DMF (500  $\mu\text{L}$ ) to afford the diene **14b** (16.4 mg, 45.5  $\mu\text{mol}$ , 72%) as an orange oil with little impurities of  $\text{Bu}_3\text{SnI}$ .  $R_f = 0.19$  (petroleum ether/ethyl acetate, 10:1);  $^1\text{H NMR}$  (600.130 MHz,  $\text{CDCl}_3$ ):  $\delta = 1.27$  (s, 12 H), 1.49 (m, 4 H), 2.20 (m, 4 H), 2.52 (s, 3 H), 5.45 (d,  $J = 17.9$  Hz, 1 H), 6.27 (dt,  $J = 15.7$  Hz,  $J = 7.0$  Hz, 1 H), 6.48 (d,  $J = 15.6$  Hz, 1 H), 6.63 (dt,  $J = 17.9$  Hz,  $J = 6.4$  Hz, 1 H), 6.88 (d,  $J = 3.8$  Hz, 1 H), 7.54 (d,  $J = 3.9$  Hz, 1 H);  $^{13}\text{C NMR}$  (150.90 MHz,  $\text{CDCl}_3$ ):  $\delta = 13.6, 17.5, 24.8, 26.5, 26.8, 27.7, 27.8, 28.3, 29.7, 32.8, 35.5, 83.0, 122.9, 124.9, 133.1, 135.2, 141.3, 151.5, 154.2, 190.4$ ; HR-MS (ESI):  $m/z = 361.2004$  ( $\text{C}_{20}\text{H}_{30}\text{B}_0\text{S}$ ), calculated  $m/z = 361.2007$ .

**1-(5-((1*E*,9*E*)-10-(4,4,5,5-tetramethyl-1,3,2-dioxaborolan-2-yl)deca-1,9-dien-1-yl)thiophen-2-yl)ethanone **14c****

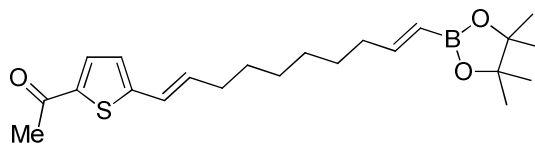

**14c**

The reaction was performed according to the general procedure as described above for PdCl<sub>2</sub>(CH<sub>3</sub>CN)<sub>2</sub> (825 mg, 3.18 μmol, 5 mol%), 2-Acetyl-5-iodothiophene **11** (16.0 mg, 63.5 μmol, 1.0 eq.) and stannane **3c** (53.0 mg, 95.2 μmol, 1.5 eq.) in degassed, anhydrous DMF (250 μL) to afford the diene **14c** (20.1 mg, 51.8 μmol, 82%) as an orange oil with little impurities of Bu<sub>3</sub>SnI. R<sub>f</sub>= 0.21 (petroleum ether/ethyl acetate, 10:1); <sup>1</sup>H NMR (300.132 MHz, CDCl<sub>3</sub>): δ= 1.27 (s, 12 H), 1.54 (m, 8 H), 2.18 (dq, *J*= 13.0 Hz, *J*= 6.6 Hz, 4 H), 2.52 (s, 3 H), 5.43 (d, *J*= 18.0 Hz, 1 H), 6.28 (dt, *J*= 15.7 Hz, *J*= 6.9 Hz, 1 H), 6.48 (d, *J*= 15.8 Hz, 1 H), 6.63 (dt, *J*= 17.9 Hz, *J*= 6.4 Hz, 1 H), 6.88 (d, *J*= 3.9 Hz, 1 H), 7.53 (d, *J*= 3.9 Hz, 1 H); <sup>13</sup>C NMR (75.48 MHz, CDCl<sub>3</sub>): δ= 13.6, 17.5, 24.8, 26.5, 26.8, 27.8, 28.1, 28.8, 29.0, 29.0, 32.9, 35.7, 83.0, 122.8, 124.9, 133.1, 135.6 (2 C), 141.3, 151.6, 154.6, 190.4; HR-MS (ESI): *m/z*= 389.2318 (C<sub>22</sub>H<sub>34</sub>B<sub>0</sub>S), calculated *m/z*= 389.2320.

**General procedure for the Suzuki-Miyaura coupling reactions of pinacolboranes **12** and **14****

The reaction was conducted in an amber glass septum vial in absence of light. (*E*)-1-iodohex-1-ene **16** (21.0 mg, 100 μmol, 1.0 eq.) and the pinacol borane (29.5 mg, 140 μmol, 1.4 eq.) were diluted in anhydrous DMF (600 μL). Pd(dppf)Cl<sub>2</sub> (11.0 mg, 15.0 μmol, 15 mol%) and Ba(OH)<sub>2</sub>·8H<sub>2</sub>O (94.6 mg, 300 μmol, 3.0 eq.) were added to the vigorous stirring solution sequentially. After stirring over night the reaction mixture was quenched with diethyl ether (3 mL) and pH 7 buffer solution (6 mL) and extracted with diethyl ether (3 x 8 mL). The combined organic layers were dried over MgSO<sub>4</sub> and concentrated under reduced pressure. After purification by column chromatography (SiO<sub>2</sub>, petroleum ether/ethyl acetate, 10:1) the corresponding polyene was yielded.

### 1-(5-((1*E*,3*E*,5*E*)-deca-1,3,5-trien-1-yl)thiophen-2-yl)ethanone **13a**

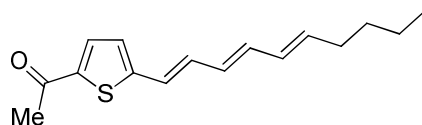

**13a**

The reaction was performed according to the general procedure as described above for (*E*)-1-iodohex-1-ene **16** (8.80 mg, 41.8  $\mu\text{mol}$ , 1.0 eq.), pinacol borane **12a** (17.8 mg, 58.5  $\mu\text{mol}$ , 1.4 eq.), anhydrous DMF (250  $\mu\text{L}$ ), Pd(dppf)Cl<sub>2</sub> (4.60 mg, 6.27  $\mu\text{mol}$ , 15 mol%) and Ba(OH)<sub>2</sub>·8H<sub>2</sub>O (39.6 mg, 125  $\mu\text{mol}$ , 3.0 eq.) to obtain triene **13a** (9.80 mg, 37.6  $\mu\text{mol}$ , 90%) as a yellow oil.  $R_f$  = 0.33 (petroleum ether/ethyl acetate, 10:1); <sup>1</sup>H NMR (300.132 MHz, CDCl<sub>3</sub>):  $\delta$  = 0.91 (m, 3 H), 1.38 (m, 4 H), 2.15 (q,  $J$  = 7.0 Hz, 2 H), 2.53 (s, 3 H), 5.85 (dt,  $J$  = 14.8 Hz,  $J$  = 7.2 Hz, 1 H), 6.18 (m, 2 H), 6.40 (dd,  $J$  = 14.9 Hz,  $J$  = 10.6 Hz, 1 H), 6.59 (d,  $J$  = 15.3 Hz, 1 H), 6.79 (dd,  $J$  = 15.3 Hz,  $J$  = 10.5 Hz, 1 H), 6.94 (d,  $J$  = 4.0 Hz, 1 H), 7.54 (d,  $J$  = 4.0 Hz, 1 H); <sup>13</sup>C NMR (75.48 MHz, CDCl<sub>3</sub>):  $\delta$  = 13.9, 22.2, 26.5, 31.3, 32.6, 123.4, 125.8, 129.4, 130.2, 132.9, 133.2, 136.4, 138.1, 141.8, 151.5, 190.2; HR-MS (FAB):  $m/z$  = 261.1345 (C<sub>16</sub>H<sub>21</sub>O<sub>S</sub>), calculated  $m/z$  = 261.1308.

### 1-(5-((1*E*,3*E*,5*E*,7-*E*)-dodeca-1,3,5,7-tetraen-1-yl)thiophen-2-yl)ethanone **13b**

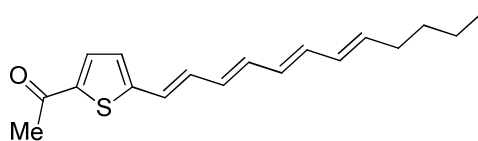

**13b**

The reaction was performed according to the general procedure as described above for (*E*)-1-iodohex-1-ene **16** (6.09 mg, 29.0  $\mu\text{mol}$ , 1.0 eq.), pinacol borane **12b** (13.4 mg, 40.6  $\mu\text{mol}$ , 1.4 eq.), anhydrous DMF (200  $\mu\text{L}$ ), Pd(dppf)Cl<sub>2</sub> (3.55 mg, 4.35  $\mu\text{mol}$ , 15 mol%) and Ba(OH)<sub>2</sub>·8H<sub>2</sub>O (27.4 mg, 87.0  $\mu\text{mol}$ , 3.0 eq.) to obtain tetraene **13b** (6.50 mg, 22.7  $\mu\text{mol}$ , 78%) as a dark orange oil.  $R_f$  = 0.31 (petroleum ether/ethyl acetate, 10:1); <sup>1</sup>H NMR (600.130 MHz, CDCl<sub>3</sub>):  $\delta$  = 0.91 (m, 3 H), 1.35 (m, 4 H), 2.14 (q,  $J$  = 7.1 Hz, 2 H), 2.53 (s, 3 H), 5.81 (dt,  $J$  = 14.9 Hz,  $J$  = 7.3 Hz, 1 H), 6.12 (dd,  $J$  = 14.9 Hz,  $J$  = 10.8 Hz, 1 H), 6.21 (dd,  $J$  = 14.7 Hz,  $J$  = 10.9 Hz, 1 H), 6.31 (dt,  $J$  = 14.8 Hz,  $J$  = 10.2 Hz, 2 H), 6.44 (dd,  $J$  = 14.6 Hz,

$J = 11.0$  Hz, 1 H), 6.61 (d,  $J = 15.2$  Hz, 1 H), 6.81 (dd,  $J = 15.3$  Hz,  $J = 10.8$  Hz, 1 H), 6.95 (d,  $J = 3.9$  Hz, 1 H), 7.55 (d,  $J = 3.9$  Hz, 1 H);  $^{13}\text{C}$  NMR (150.90 MHz,  $\text{CDCl}_3$ ):  $\delta = 13.9, 22.2, 26.50, 31.3, 32.7, 123.7, 126.0, 130.2, 130.4, 130.9, 132.8, 133.3, 135.4, 136.2, 137.4, 141.8, 151.4, 190.3$ ; HR-MS (FAB):  $m/z = 286.1389$  ( $\text{C}_{18}\text{H}_{22}\text{OS}$ ), calculated  $m/z = 286.1391$ .

### 1-(5-((1*E*,5*E*,7*E*)-dodeca-1,5,7-trien-1-yl)thiophen-2-yl)ethanone 15a

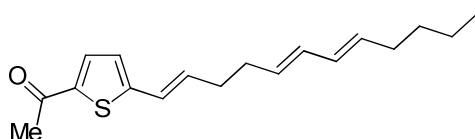

15a

The reaction was performed according to the general procedure as described above for (*E*)-1-iodohex-1-ene **16** (5.67 mg, 27.0  $\mu\text{mol}$ , 1.0 eq.), pinacol borane **14a** (12.6 mg, 37.8  $\mu\text{mol}$ , 1.4 eq.), anhydrous DMF (300  $\mu\text{L}$ ),  $\text{Pd}(\text{dppf})\text{Cl}_2$  (3.31 mg, 4.05  $\mu\text{mol}$ , 15 mol%) and  $\text{Ba}(\text{OH})_2 \cdot 8\text{H}_2\text{O}$  (25.6 mg, 81.0  $\mu\text{mol}$ , 3.0 eq.) to obtain polyene **15a** (7.10 mg, 24.6  $\mu\text{mol}$ , 91%) a light yellow oil.  $R_f = 0.34$  (petroleum ether/ethyl acetate, 10:1);  $^1\text{H}$  NMR (399.892 MHz,  $\text{CDCl}_3$ ):  $\delta =$  (m, 3 H), 1.34 (m, 4 H), 2.07 (q,  $J = 7.0$  Hz, 2 H), 2.28 (m, 4 H), 5.59 (tt,  $J = 13.9$  Hz,  $J = 6.7$  Hz, 2 H), 6.03 (m, 2 H), 6.29 (dt,  $J = 15.6$  Hz,  $J = 6.6$  Hz, 1 H), 6.50 (d,  $J = 15.7$  Hz, 1 H), 6.89 (d,  $J = 3.8$  Hz, 1 H), 7.54 (d,  $J = 3.8$  Hz, 1 H);  $^{13}\text{C}$  NMR (100.56 MHz,  $\text{CDCl}_3$ ):  $\delta = 13.9, 22.2, 26.5, 31.5, 31.9, 32.3, 32.9, 125.1, 130.0, 130.3, 131.3, 133.1, 133.3, 134.5$  (2 C), 141.5, 151.3, 190.4; HR-MS (FAB):  $m/z = 289.1622$  ( $\text{C}_{18}\text{H}_{25}\text{OS}$ ), calculated  $m/z = 289.1621$ .

### 1-(5-((1*E*,7*E*,9*E*)-tetradeca-1,7,9-trien-1-yl)thiophen-2-yl)ethanone 15b

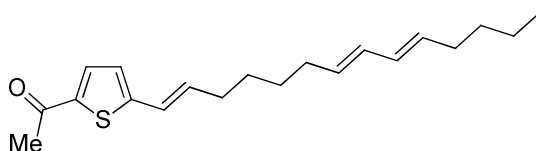

15b

The reaction was performed according to the general procedure as described above for (*E*)-1-iodohex-1-ene **16** (3.70 mg, 17.6  $\mu\text{mol}$ , 1.0 eq.), pinacol borane **14b** (8.90 mg,



24.7  $\mu\text{mol}$ , 1.4 eq.), anhydrous DMF (100  $\mu\text{L}$ ), Pd(dppf)Cl<sub>2</sub> (1.94 mg, 2.65  $\mu\text{mol}$ , 15 mol%) and Ba(OH)<sub>2</sub>·8H<sub>2</sub>O (16.7 mg, 52.8  $\mu\text{mol}$ , 3.0 eq.) to obtain product **15b** (3.60 mg, 10.7  $\mu\text{mol}$ , 61%) as a light yellow oil.  $R_f$  = 0.36 (petroleum ether/ethyl acetate, 10:1); <sup>1</sup>H NMR (399.892 MHz, CDCl<sub>3</sub>):  $\delta$  = 0.90 (m, 3 H), 1.40 (m, 8 H), 2.08 (m, 4 H), 2.21 (m, 2 H), 2.52 (s, 3 H), 5.57 (m, 2 H), 6.01 (m, 2 H), 6.28 (m, 1 H), 6.48 (d,  $J$  = 15.7 Hz, 1 H), 6.88 (d,  $J$  = 3.8 Hz, 1 H), 7.54 (d,  $J$  = 3.9 Hz, 1 H); <sup>13</sup>C NMR (100.56 MHz, CDCl<sub>3</sub>):  $\delta$  = 13.9, 22.2, 26.5, 28.4, 31.6, 32.3, 32.3, 32.8, 122.9, 124.9, 130.2, 130.7, 131.7, 132.7, 133.1, 135.4 (2 C), 141.4, 151.5, 190.4; HR-MS (FAB):  $m/z$  = 317.1937 (C<sub>20</sub>H<sub>29</sub>O<sub>2</sub>S), calculated  $m/z$  = 317.1934.

### 1-(5-((1*E*,9*E*,11*E*)-hexadeca-1,9,11-trien-1-yl)thiophen-2-yl)ethanone **15c**

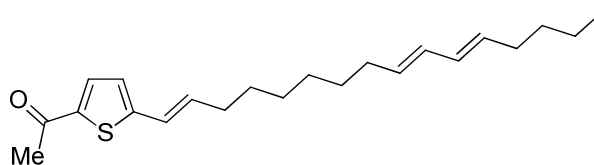

**15c**

The reaction was performed according to the general procedure as described above for (*E*)-1-iodohex-1-ene **16** (7.50 mg, 35.5  $\mu\text{mol}$ , 1.0 eq.), pinacol borane **14c** (19.3 mg, 49.7  $\mu\text{mol}$ , 1.4 eq.), anhydrous DMF (200  $\mu\text{L}$ ), Pd(dppf)Cl<sub>2</sub> (3.89 mg, 5.32  $\mu\text{mol}$ , 15 mol%) and Ba(OH)<sub>2</sub>·8H<sub>2</sub>O (33.8 mg, 107  $\mu\text{mol}$ , 3.0 eq.) to obtain product **15c** (7.80 mg, 22.7  $\mu\text{mol}$ , 64%) as a light yellow oil.  $R_f$  = 0.34 (petroleum ether/ethyl acetate, 10:1); <sup>1</sup>H NMR (399.892 MHz, CDCl<sub>3</sub>):  $\delta$  = 0.90 (m, 3 H), 1.40 (m, 12 H), 2.07 (m, 4 H), 2.20 (q,  $J$  = 7.1 Hz, 2 H), 2.52 (s, 3 H), 5.57 (dtd,  $J$  = 14.2 Hz,  $J$  = 6.9 Hz,  $J$  = 6.9 Hz,  $J$  = 4.2 Hz, 2 H), 5.99 (m, 2 H), 6.29 (m, 1 H), 6.48 (d,  $J$  = 15.8 Hz, 1 H), 6.88 (d,  $J$  = 3.8 Hz, 1 H), 7.54 (d,  $J$  = 3.9 Hz, 1 H); <sup>13</sup>C NMR (100.56 MHz, CDCl<sub>3</sub>):  $\delta$  = 13.9, 26.5, 28.8, 29.0, 29.0, 29.3, 31.6, 32.3, 32.5, 32.9, 122.8, 124.9, 130.3, 130.4, 132.2, 132.5, 133.1, 135.6 (2 C), 141.3, 151.6, 190.4; HR-MS (FAB):  $m/z$  = 345.2255 (C<sub>22</sub>H<sub>33</sub>O<sub>2</sub>S), calculated  $m/z$  = 345.2247.

### (*S*)-methyl 3-(4-methoxybenzyloxy)-2-methylpropanoate **25**

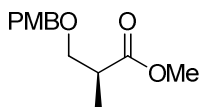

**25**

To the solution of (*S*)-Roche ester (526 mg, 4.45 mmol, 1.0 eq) in CH<sub>2</sub>Cl<sub>2</sub> (6 mL) PMB(HNC)CCl<sub>3</sub> (1.20 g, 4.45 mmol, 1.0 eq) and CSA (62.0 mg, 267 μmol, 0.06 eq) were added and the solution was stirred for 16 h. Then saturated NaHCO<sub>3</sub> solution (6 mL) was added and the aqueous layer extracted three times with CH<sub>2</sub>Cl<sub>2</sub> (5 mL). The combined organic phases were washed with saturated NaHCO<sub>3</sub> solution (10 mL) and brine (10 mL), dried over MgSO<sub>4</sub>, filtered and the organic solvent was removed under reduced pressure. After purification by chromatography (SiO<sub>2</sub>, petroleum ether/ethyl acetate, 4:1) ester **25** was obtained as a colourless, oily liquid (1.05 g, 4.41 mmol, 99%). *R*<sub>f</sub> = 0.78 (petroleum ether/ethyl acetate, 3:1); [α]<sup>22</sup><sub>D</sub> = +9.26 (c = 1.00, CHCl<sub>3</sub>); <sup>1</sup>H NMR (500.130 MHz, CDCl<sub>3</sub>): δ = 1.18 (d, *J* = 7.1 Hz, 3 H), 2.78 (sxt, *J* = 6.9 Hz, 1 H), 3.47 (dd, *J* = 9.2 Hz, *J* = 5.9 Hz, 1 H), 3.64 (dd, *J* = 9.2 Hz, *J* = 7.3 Hz, 1 H), 3.70 (s, 3 H), 3.81 (s, 3 H), 4.46 (m, 2 H), 6.88 (d, *J* = 8.5 Hz, 2 H), 7.25 (d, *J* = 8.5 Hz, 2 H); <sup>13</sup>C NMR (125.76 MHz, CDCl<sub>3</sub>): δ = 13.7, 39.9, 51.4, 55.0, 71.4, 72.5, 113.4, 128.9, 129.9, 158.9, 175.1; HR-MS (ESI): *m/z* = 261.1097 (C<sub>13</sub>H<sub>18</sub>O<sub>4</sub>Na), calculated *m/z* = 261.1103.

### (*R*)-3-(4-methoxybenzyloxy)-2-methylpropan-1-ol **26**

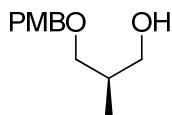

**26**

A Solution of (*S*)-methyl 3-(4-methoxybenzyloxy)-2-methylpropanoate **25** (1.00 g, 4.20 mmol, 1.0 eq) in CH<sub>2</sub>Cl<sub>2</sub> (14 mL) under argon atmosphere was cooled down to -78 °C and treated with DIBAL-H (12.6 mL, 1 M in hexane, 12.6 mmol, 3.0 eq) over a period of 45 min. After stirring for 2 h at -78 °C, the reaction mixture was diluted by adding Et<sub>2</sub>O (15 mL), warmed to room temperature and treated with H<sub>2</sub>O (6 mL) carefully. The resulting mixture was stirred until a gel was formed. Then NaOH (2 N, 8 mL) was added and stirred

until the gel dissolved. The organic layer was separated, the aqueous phase was extracted with Et<sub>2</sub>O (3 x 10 mL) and the combined organic phases were dried over MgSO<sub>4</sub>, filtrated and concentrated under reduced pressure. After purification by chromatography (SiO<sub>2</sub>, *n*-hexane/ethyl acetate 3:1), the desired alcohol **26** was obtained as colourless liquid (799 mg, 3.80 mmol, 90%).  $R_f = 0.22$  (*n*-hexane /ethyl acetate, 3:1);  $[\alpha]^{22}_D = +15.9$  ( $c = 1.00$ , CHCl<sub>3</sub>); <sup>1</sup>H NMR (300.132 MHz, CDCl<sub>3</sub>):  $\delta = 0.92$  (d,  $J = 7.0$  Hz, 3 H), 2.10 (m, 1 H), 2.46 (br. s, 1 H), 3.44 (m, 1 H), 3.57 (dd,  $J = 9.1$  Hz,  $J = 4.6$  Hz, 1 H), 3.65 (m, 2 H), 3.85 (s, 3 H), 4.49 (s, 2 H), 6.93 (d,  $J = 8.6$  Hz, 2 H), 7.29 (d,  $J = 8.6$  Hz, 2 H); <sup>13</sup>C NMR (75.48 MHz, CDCl<sub>3</sub>):  $\delta = 13.0, 35.1, 54.8, 67.5, 72.6, 74.7, 113.4, 128.8, 129.7, 158.8$ ; HR-MS (ESI):  $m/z = 233.1147$  (C<sub>12</sub>H<sub>18</sub>O<sub>3</sub>Na), calculated  $m/z = 233.1148$ .

### (*S*)-3-(4-methoxybenzyloxy)-2-methylpropanal **27**

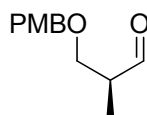

**27**

At 0° C Dess-Martin periodinane (565 mg, 1.33 mmol, 1.4 eq) was added to a solution of alcohol **26** (200 mg, 951  $\mu$ mol, 1.0 eq) in CH<sub>2</sub>Cl<sub>2</sub> (10 mL). The solution was allowed to warm to room temperature within 3 h. After evaporation of the solvent in vacuo purification by flash chromatography (SiO<sub>2</sub>, petroleum ether/ethyl acetate 10:1) provided the desired aldehyde **27** as a colourless liquid (190 mg, 904  $\mu$ mol, 95%).  $R_f = 0.23$  (petroleum ether/ethyl acetate, 10:1);  $[\alpha]^{22}_D = +30.5$  ( $c = 1.00$ , CHCl<sub>3</sub>); <sup>1</sup>H NMR (300.132 MHz, CDCl<sub>3</sub>):  $\delta = 1.17$  (d,  $J = 7.3$  Hz, 3 H), 2.70 (sxt,  $J = 7.0$  Hz, 1 H), 3.67 (m, 2 H), 3.86 (s, 3 H), 4.51 (s, 2H), 6.93 (d,  $J = 8.8$  Hz, 2 H), 7.29, (d,  $J = 8.4$  Hz, 2 H), 9.76 (d,  $J = 1.5$  Hz, 1 H); <sup>13</sup>C NMR (75.48 MHz, CDCl<sub>3</sub>):  $\delta = 10.7, 46.8, 55.2, 69.8, 72.9, 113.8, 129.2, 129.9, 159.2, 204.0$ ; HR-MS (EI<sup>+</sup>): found  $m/z = 208.1091$  (C<sub>12</sub>H<sub>16</sub>O<sub>3</sub>), calculated  $m/z = 208.1099$ .

**(3*S*,4*S*)-5-(4-methoxybenzyloxy)-4-methyl-1-(trimethylsilyl)pent-1-yn-3-ol 17**

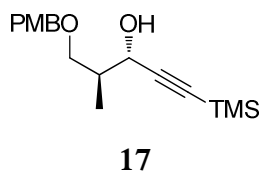

TMS acetylene (421  $\mu$ L, 3.04 mmol, 4.0 eq) was added to Et<sub>2</sub>Zn (2.76 mL, 1.1 M in toluene, 2.76 mmol, 4.0 eq.) carefully. The mixture was heated to reflux for 1 h, during which time a large amount of grey precipitate formed in the reaction flask. The mixture was cooled to room temperature, and (*R*)-BINOL (87.0 mg, 304  $\mu$ mol, 0.4 eq.), Et<sub>2</sub>O (14 mL) and Ti(O*i*Pr)<sub>4</sub> (226  $\mu$ L, 759  $\mu$ mol, 1.0 eq) were added. After 1 h, aldehyde **27** (158 mg, 759  $\mu$ mol, 1.0 eq) was added, and the mixture was stirred overnight. The reaction was quenched with 1 M tartaric acid (6 mL) and the mixture was stirred for 30 min. The mixture was partitioned in a separatory funnel, and the aqueous phase was extracted with Et<sub>2</sub>O (3 x 7 mL). The combined organic extracts were washed with brine and dried over MgSO<sub>4</sub>, filtrated and concentrated under reduced pressure. The residue was purified by flash chromatography (SiO<sub>2</sub>, petroleum ether/ethyl acetate, 100:2.5 to 100:5) to afford **17** as a light yellow oil (185 mg, 604  $\mu$ mol, 80%).  $R_f$  = 0.47 (petroleum ether/ethyl acetate, 5:1);  $[\alpha]_D^{22} = +7.13$  ( $c = 1.00$ , CHCl<sub>3</sub>); <sup>1</sup>H NMR (300.132 MHz, CDCl<sub>3</sub>):  $\delta = 0.17$  (s, 9 H), 1.05 (d,  $J = 7.0$  Hz, 3 H), 2.06 (sxt d,  $J = 6.8$  Hz,  $J = 4.4$  Hz, 1 H), 3.44 (dd,  $J = 9.3$  Hz,  $J = 6.8$  Hz, 1 H), 3.68 (dd,  $J = 9.3$  Hz,  $J = 4.2$  Hz, 1 H), 3.81 (s, 3 H), 4.40 (d,  $J = 6.2$  Hz, 1 H), 4.46 (d,  $J = 2.9$  Hz, 2 H), 6.88 (d,  $J = 8.8$  Hz, 2 H), 7.26 (d,  $J = 8.8$  Hz, 2 H); <sup>13</sup>C NMR (75.48 MHz, CDCl<sub>3</sub>):  $\delta = -0.1$ , 13.2, 39.2, 55.2, 66.8, 73.1, 73.3, 89.9, 105.5, 113.8, 129.2, 129.9, 159.2; HR-MS (ESI): found  $m/z = 329.1547$  (C<sub>17</sub>H<sub>26</sub>O<sub>3</sub>SiNa), calculated  $m/z = 329.1543$ .

***tert*-butyl(((3*S*,4*S*)-5-((4-methoxybenzyl)oxy)-4-methyl-1-(trimethylsilyl)pent-1-yn-3-yl)oxy)dimethylsilane 28**

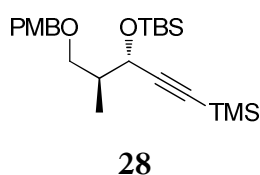

2,6-Lutidine (587 mg, 5.48 mmol, 4.2 eq.) and *tert*-butyldimethylsilyl trifluoromethanesulfonate (1.10 g, 4.18 mmol, 3.2 eq.) were added slowly to a solution of alcohol **17** (400 mg, 1.31 mmol, 1.0 eq.) in CH<sub>2</sub>Cl<sub>2</sub> (5 mL) at -78° C. After stirring for 1 h, the reaction was quenched by addition of aqueous saturated NaHCO<sub>3</sub> (10 mL) and extracted with CH<sub>2</sub>Cl<sub>2</sub> (3 x 7 mL). The combined organic phases were dried with MgSO<sub>4</sub>, concentrated under reduced pressure and purified by flash chromatography (SiO<sub>2</sub>, *n*-hexane/ethyl acetate, 50:1) to afford the protected alcohol **28** as a colourless liquid (528 mg, 1.25 mmol, 96%). *R*<sub>f</sub>= 0.33 (petroleum ether/ethyl acetate, 50:1); [α]<sup>22</sup><sub>D</sub> = -13.3 (c = 1.00, CHCl<sub>3</sub>); <sup>1</sup>H NMR (300.132 MHz, CDCl<sub>3</sub>): δ = 0.10 (s, 3 H) 0.14 (s, 3 H) 0.16 (s, 9 H) 0.90 (s, 9 H) 1.01 (d, *J* = 7.0 Hz, 3 H) 2.02 (spt, *J* = 6.5 Hz, 1 H) 3.39 (dd, *J* = 9.3 Hz, *J* = 6.0 Hz, 1 H) 3.50 (dd, *J* = 9.3 Hz, *J* = 6.0 Hz, 1 H) 3.81 (s, 3 H) 4.44 (m, 3 H) 6.88 (d, *J* = 8.6 Hz, 2 H) 7.26 (d, *J* = 8.6 Hz, 2 H); <sup>13</sup>C NMR (75.48 MHz, CDCl<sub>3</sub>): δ = -5.1, -4.5, -0.2, 12.7, 18.2, 25.8, 40.5, 55.2, 65.2, 71.1, 72.7, 89.7, 106.1, 113.7, 129.1, 130.8, 159.0; HR-MS (ESI): found *m/z* = 443.2410 (C<sub>23</sub>H<sub>40</sub>O<sub>3</sub>Si<sub>2</sub>Na), calculated *m/z* = 443.2408.

***tert*-butyl(((3*S*,4*S*)-5-((4-methoxybenzyl)oxy)-4-methylpent-1-yn-3-yl)oxy)dimethylsilane **29****

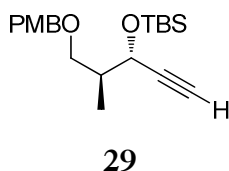

Potassium carbonate (63.3 mg, 458 μmol, 1.1 eq.) was added to a solution of the TMS-protected alkyne **28** (175 mg, 416 μmol, 1.0 eq) in MeOH (1.5 mL). The reaction mixture was stirred vigorously at room temperature for 1 h. The reaction was quenched by addition of saturated aqueous NH<sub>4</sub>Cl and the volatiles were removed in vacuo. The residue was extracted with diethyl ether (3 x 1 mL), the combined organic phases were washed with water (1 mL), brine (1 mL), dried over MgSO<sub>4</sub>, filtered and concentrated under reduced pressure. Purification by flash chromatography (SiO<sub>2</sub>, petroleum ether/ethyl acetate 50:1) provided the desired terminal alkyne **29** (141 mg, 404 μmol, 97%). *R*<sub>f</sub>= 0.17 (petroleum ether/ethyl acetate, 50:1); [α]<sup>22</sup><sub>D</sub> = -10.7 (c = 1.00, CHCl<sub>3</sub>); <sup>1</sup>H NMR (300.132 MHz, CDCl<sub>3</sub>): δ = 0.11 (s, 3 H), 0.15 (s, 3 H), 0.91 (s, 9 H), 1.03 (d, *J* = 7.0 Hz, 3 H), 2.06 (spt, *J* = 6.4 Hz, 1 H), 2.37 (d, *J* = 2.0 Hz, 1 H), 3.40 (dd, *J* = 9.3 Hz, *J* = 5.8 Hz, 1 H), 3.49 (dd, *J* = 9.3 Hz, *J* = 7.0 Hz, 1 H),

3.82 (s, 3 H), 4.44 (s, 2 H), 6.89 (d,  $J = 8.6$  Hz, 2 H), 7.26 (d,  $J = 8.6$  Hz, 2 H);  $^{13}\text{C}$  NMR (75.48 MHz,  $\text{CDCl}_3$ ):  $\delta = -5.2, -4.6, 12.3, 18.2, 25.8, 40.5, 55.3, 64.5, 71.6, 72.7, 73.1, 83.8, 113.7, 129.1, 130.7, 159.1$ ; HR-MS (ESI): found  $m/z = 371.2022$  ( $\text{C}_{20}\text{H}_{32}\text{O}_3\text{SNa}$ ), calculated  $m/z = 371.2013$ .

***tert*-butyl(((3*S*,4*S*,*E*)-1-iodo-5-((4-methoxybenzyl)oxy)-4-methylpent-1-en-3-yl)oxy)dimethylsilane **18****

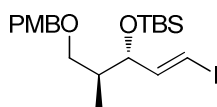

To  $\text{ZrCp}_2\text{Cl}_2$  (45.0 mg, 157  $\mu\text{mol}$ , 1.1 eq.) in THF (250  $\mu\text{L}$ ) cooled to 0  $^\circ\text{C}$  was added slowly a solution DIBAL-H (156  $\mu\text{L}$ , 1 M in THF, 156  $\mu\text{mol}$ , 1.0 eq.) under argon. The resultant suspension was stirred for 30 min at 0  $^\circ\text{C}$ , followed by addition of alkyne **29** (50.0 mg, 143  $\mu\text{mol}$ , 1.0 eq.) in THF (150  $\mu\text{L}$ ). The mixture was warmed to room temperature and stirred until a homogenous solution resulted and then cooled to -78  $^\circ\text{C}$ , followed by addition of  $\text{I}_2$  (47.2 mg, 186  $\mu\text{mol}$ , 1.30 eq.) in THF (200  $\mu\text{L}$ ). After 1 h at -78  $^\circ\text{C}$  the reaction mixture was quenched with 1 N HCl, extracted with diethyl ether, washed successively with saturated aqueous  $\text{Na}_2\text{S}_2\text{O}_3$ ,  $\text{NaHCO}_3$  and brine, dried over  $\text{MgSO}_4$ , filtered and concentrated. Flash chromatography ( $\text{SiO}_2$ , petroleum ether) afforded vinyl iodide **18** as colourless liquid (46.5 mg, 97.6  $\mu\text{mol}$ , 62%).  $R_f = 0.19$  (petroleum ether/ethyl acetate, 50:1);  $[\alpha]^{22}_{\text{D}} = +1.39$  ( $c = 1.00$ ,  $\text{CHCl}_3$ );  $^1\text{H}$  NMR (300.132 MHz,  $\text{CDCl}_3$ ):  $\delta = 0.02$  (s, 3 H), 0.04 (s, 3 H), 0.89 (m, 12 H), 1.92 (dq,  $J = 12.8$  Hz,  $J = 6.5$  Hz,  $J = 6.5$  Hz,  $J = 6.5$  Hz,  $J = 6.5$  Hz, 1 H), 3.34 (m, 2 H), 3.82 (s, 3 H), 4.15 (m, 1 H), 4.41 (m, 2 H), 6.14 (dd,  $J = 14.4$  Hz,  $J = 1.0$  Hz, 1 H), 6.48 (dd,  $J = 14.4$  Hz,  $J = 6.7$  Hz, 1 H), 6.89 (d,  $J = 8.7$  Hz, 2 H), 7.25 (d,  $J = 9.2$  Hz, 2 H);  $^{13}\text{C}$  NMR (75.48 MHz,  $\text{CDCl}_3$ ):  $\delta = -5.0, -4.5, 12.5, 18.2, 25.8, 39.9, 55.3, 71.5, 72.7, 76.4, 76.5, 113.8, 129.2, 130.6, 147.1, 159.1$ ; HR-MS (ESI): found  $m/z = 499.1132$  ( $\text{C}_{20}\text{H}_{33}\text{IO}_3\text{SiNa}$ ), calculated  $m/z = 499.1136$ .

### Methyl-pent-4-enoate **30**

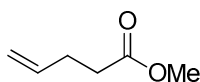

**30**

A solution of Pent-4-enoic acid **24** (10.0 g, 100 mmol, 1.0 eq.) in dried CH<sub>3</sub>OH (170 mL, 420 mol, 42 eq.) was treated with concentrated H<sub>2</sub>SO<sub>4</sub> (1.00 mL). After refluxing for 3 h, the reaction mixture was washed with water (2 x 140 mL) and the resulting mixture was extracted with Et<sub>2</sub>O (3 x 200 mL), dried with MgSO<sub>4</sub> and concentrated. The residue was purified by vigreux distillation to afford the pure ester **30** as a colourless liquid (8.24 g, 72.2 mmol, 72%). *R<sub>f</sub>* = 0.63 (*n*-hexane/ethyl acetate, 8:1); <sup>1</sup>H NMR (300.132 MHz, CDCl<sub>3</sub>) δ = 2.39 (m, 4 H), 3.68 (s, 3 H), 5.03 (m, 2 H), 5.82 (m, 1 H); <sup>13</sup>C NMR (75.48 MHz, CDCl<sub>3</sub>) δ = 28.4, 33.9, 51.1, 115.1, 136.2, 173.1; EI MS (70 eV, *m/z*(%)): 114 ([M]<sup>+</sup>, 27.5), 55 (100).

### (*E*)-Methyl 6-oxohex-4-enoate **31**

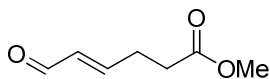

**31**

Crotonaldehyde (6.14 g, 87.6 mmol, 10 eq.) dissolved in dried CH<sub>2</sub>Cl<sub>2</sub> (30 mL) was added to a solution of olefin **30** (1.00 g, 8.76 mmol, 1.0 eq.) in deaerated CH<sub>2</sub>Cl<sub>2</sub> (10 mL). Hoveyda-Grubbs catalyst second generation (165 mg, 3.0 mol%) was added and the reaction mixture was heated to 40 °C under an argon atmosphere for 2 h. After stirring, the mixture was concentrated under reduced pressure and purified by flash chromatography (SiO<sub>2</sub>, *n*-hexane/ethyl acetate, 4:1) to afford aldehyde **31** as a brown liquid (1.16 g, 8.16 mmol, 93%). *R<sub>f</sub>* = 0.24 (*n*-hexane/ethyl acetate, 4:1); <sup>1</sup>H NMR (300.132 MHz, CDCl<sub>3</sub>) δ = 2.53 (m, 2 H), 2.65 (m, 2 H), 3.68 (s, 3 H), 6.12 (dd, *J* = 15.3 Hz, *J* = 7.8 Hz, 1 H), 6.85 (dt, *J* = 15.7 Hz, *J* = 6.4 Hz, 1 H), 9.49 (d, *J* = 7.7 Hz, 1 H); <sup>13</sup>C NMR (75.48 MHz, CDCl<sub>3</sub>) δ = 27.1, 31.4, 51.4, 132.9, 155.3, 172.0, 193.3; HR-MS (EI) found *m/z* = 142.0654 (C<sub>7</sub>H<sub>10</sub>O<sub>3</sub>), calculated *m/z* = 142.0630.

**(*S,E*)-Methyl 6-hydroxynona-4,8-dienoate 32**

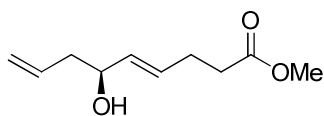

**32**

Allylmagnesium bromide (5.63 mL, 1.00 M in diethyl ether, 5.63 mmol, 4.0 eq.) was added dropwise to a well-stirred solution of (-)-(Ipc)<sub>2</sub>BOMe (1.78 g, 5.63 mmol, 4.0 eq.) in diethyl ether (6 mL) at 0 °C. Following addition, stirring was continued for 1 h at room temperature and ether was removed under vacuum. The residue was carefully extracted with pentane (2 x 25 mL) under argon while the reaction mixture was stirred. Next, stirring was discontinued to permit the Mg<sup>2+</sup> salts to settle, and the clear supernatant pentane extract was transferred into another flask with a double-ended needle through a filter. The combined organic phases were concentrated under vacuum. The residue was solved in diethyl ether (5 mL) and cooled to -98 °C. To the resulting mixture a solution of aldehyde **31** (200 mg, 1.41 mmol, 1.0 eq.) in diethyl ether (2.5 mL) was added slowly and stirred at -98 °C. After 3 h the reaction mixture was allowed to warm to room temperature, treated with NaOH (550 μL, 3 N) and H<sub>2</sub>O<sub>2</sub> (1.5 mL, 30 %) and then heat to reflux for 1 h. The reaction was quenched with saturated aqueous NaHCO<sub>3</sub> solution and the organic phase separated. The aqueous layer was extracted with diethyl ether (2 x 3.5 mL), MTBE (2 x 2.5 mL) and ethyl acetate (2 x 1.5 mL). The combined organic layers were dried over MgSO<sub>4</sub> and evaporated under vacuum. The residue was purified by flash chromatography (SiO<sub>2</sub>, *n*-hexane/ethyl acetate, 3:1) to afford **32** as an orange liquid (233 mg, 1.26 mmol, 90%). *R*<sub>f</sub> = 0.21 (*n*-hexane/ethyl acetate; 5:1); [α]<sub>D</sub><sup>22</sup> = -7.40 (c = 1.00, CHCl<sub>3</sub>); <sup>1</sup>H NMR (300.132 MHz, CDCl<sub>3</sub>) δ = 2.29 (m, 2 H), 2.39 (m, 4 H), 3.67 (s, 3 H), 4.13 (q, *J* = 6.2 Hz, 1 H), 5.11 (t, *J* = 1.3 Hz, 1 H), 5.15 (m, 1 H), 5.54 (m, 1 H), 5.75 (m, 2 H); <sup>13</sup>C NMR (75.48 MHz, CDCl<sub>3</sub>) δ = 27.4, 33.6, 41.9, 51.5, 71.4, 118.2, 129.5, 133.3, 134.2, 173.4; HR-MS (ESI): found *m/z* = 207.0994 (C<sub>10</sub>H<sub>16</sub>O<sub>3</sub>Na), calculated *m/z* = 207.0992.



**(*S,E*)-Methyl 6-(*tert*-butyldimethylsilyloxy)nona-4,8-dienoate 33**

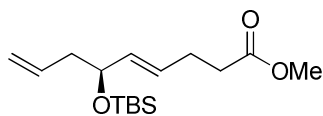

**33**

2,6-Lutidine (609 mg, 5.69 mmol, 2.1 eq.) and *tert*-butyldimethylsilyl trifluoromethanesulfonate (1.15 g, 4.34 mmol, 1.6 eq.) were added slowly to a solution of alcohol **32** (500 mg, 2.71 mmol, 1.0 eq.) in CH<sub>2</sub>Cl<sub>2</sub> (8 mL) at -78° C. After stirring for 1 h, the reaction was quenched by addition of aqueous saturated NaHCO<sub>3</sub> and extracted with CH<sub>2</sub>Cl<sub>2</sub> (3 x 10 mL). The combined organic phases were dried with MgSO<sub>4</sub>, concentrated under reduced pressure and purified by flash chromatography (SiO<sub>2</sub>, *n*-hexane/ethyl acetate, 30:1) to afford the protected alcohol **33** as a colourless liquid (803 mg, 2.69 mmol, 99%). *R*<sub>f</sub> = 0.29 (*n*-hexane/ethyl acetate; 30:1); [α]<sup>22</sup><sub>D</sub> = -2.30 (c = 1.00, CHCl<sub>3</sub>); <sup>1</sup>H NMR (300.132 MHz, CDCl<sub>3</sub>) δ = 0.01 (s, 3 H), 0.03 (s, 3 H), 0.88 (s, 9 H), 2.22 (m, 2 H), 2.36 (m, 4 H), 3.67 (s, 3 H), 4.08 (m, 1 H), 5.00 (s, 1 H), 5.04 (d, *J* = 5.1 Hz, 1 H), 5.47 (m, 1 H), 5.57 (m, 1 H), 5.76 (m, 1 H); <sup>13</sup>C NMR (75.48 MHz, CDCl<sub>3</sub>) δ = -4.8, -4.4, 18.2, 25.8, 27.4, 33.8, 43.1, 51.5, 73.0, 116.7, 128.0, 134.3, 135.1, 173.4; HR-MS (ESI): found *m/z* = 321.1860 (C<sub>16</sub>H<sub>30</sub>O<sub>3</sub>SiNa), calculated *m/z* = 321.1856.

**(*S,4E,8E*)-Methyl 6-(*tert*-butyldimethylsilyloxy)-10-oxodeca-4,8-dienoate 34**

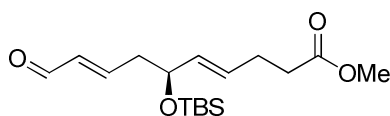

**34**

The protected Alcohol **33** (1.00 g, 3.35 mmol, 1.0 eq.) solved in CH<sub>2</sub>Cl<sub>2</sub> (3 mL) was added to a well stirred solution of crotonaldehyde (0.70 g, 10.0 mmol, 3.0 eq.) in CH<sub>2</sub>Cl<sub>2</sub> (7 mL). After Grubbs-Catalyst second generation (142 mg, 5.0 mol%) was added, the reaction mixture was heated to 40° C for 2 h, concentrated under reduced pressure and purified by flash chromatography (SiO<sub>2</sub>, *n*-hexane/ethyl acetate, 10:1) to afford aldehyde **34** as a yellow-brown liquid (940 mg, 2.88 mmol, 86%). *R*<sub>f</sub> = 0.28 (*n*-hexane/ethyl acetate; 10:1); [α]<sup>22</sup><sub>D</sub> = +0.65 (c = 1.00, CHCl<sub>3</sub>); <sup>1</sup>H NMR (300.132 MHz, CDCl<sub>3</sub>) δ = 0.02 (s, 3 H), 0.03 (s, 3 H), 0.88 (s, 9

H), 2.37 (m, 4 H), 2.50 (ddd,  $J = 7.2$  Hz,  $J = 5.9$  Hz,  $J = 1.5$  Hz, 2 H), 3.67 (s, 3 H), 4.24 (m, 1 H), 5.47 (m, 1 H), 5.63 (m, 1 H), 6.12 (ddt,  $J = 15.7$  Hz,  $J = 7.9$  Hz,  $J = 1.2$  Hz,  $J = 1.2$  Hz, 1 H), 6.82 (dt,  $J = 15.7$  Hz,  $J = 7.3$  Hz, 1 H), 9.50 (d,  $J = 8.1$  Hz, 1 H);  $^{13}\text{C}$  NMR (75.48 MHz,  $\text{CDCl}_3$ )  $\delta = -5.3, -4.7, 17.7, 25.3, 26.8, 33.2, 41.2, 51.1, 71.5, 128.8, 133.0, 134.4, 154.4, 172.8, 193.5$ ; HR-MS (ESI): found  $m/z = 349.1807$  ( $\text{C}_{17}\text{H}_{30}\text{O}_4\text{SiNa}$ ), calculated  $m/z = 349.1811$ .

**(*S,4E,8E,10E*)-Methyl 6-(*tert*-butyldimethylsilyloxy)-11-iodoundeca-4,8,10-trieno-ate 19**

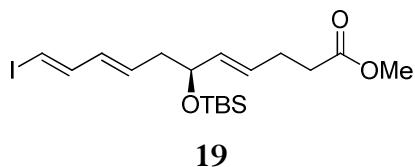

To a cooled ( $0^\circ\text{C}$ ) suspension of  $\text{CrCl}_2$  (2.11 g, 17.2 mmol, 14 eq.) in mixed solvent (THF/dioxane, 1:6, 15 mL) was added dropwise a solution of aldehyde **34** (400 mg, 1.23 mmol, 1.00 eq.) and iodoform (4.25 g, 10.8 mmol, 8.8 eq.) in mixed solvent (THF/dioxane, 1:6, 15 mL and 6 mL washing). The resulted brown mixture was stirred at room temperature for 4 h in the absence of light, quenched by sequential additions of aqueous saturated  $\text{NH}_4\text{Cl}$  (70 mL), saturated  $\text{Na}_2\text{S}_2\text{O}_3$  (35 mL) and water (70 mL). The resulted mixture was extracted with diethyl ether (3 x 100 mL) and the combined organic phases were washed with saturated  $\text{Na}_2\text{S}_2\text{O}_3$  (70 mL) and brine (70 mL), dried over  $\text{MgSO}_4$  and concentrated under vacuum. Flash chromatography ( $\text{SiO}_2$ , *n*-hexane/ethyl acetate, 40:1 to 20:1) provided vinyl iodide **19** as a yellow oil (480 mg, 1.07 mmol, 87%,  $E/Z = 7:1$  based on  $^1\text{H}$  NMR integrations).  $R_f = 0.48$  (*n*-hexane/ethyl acetate; 10:1);  $[\alpha]_D^{22} = +3.50$  ( $c = 1.00$ ,  $\text{CHCl}_3$ );  $^1\text{H}$  NMR (300.132 MHz,  $\text{CDCl}_3$ )  $\delta = 0.00$  (s, 3 H), 0.02 (s, 3 H), 0.87 (s, 9 H), 2.20 (t,  $J = 6.7$  Hz, 2 H), 2.36 (m, 4 H), 3.67 (s, 3 H), 4.09 (m, 1 H), 5.44 (m, 1 H), 5.62 (m, 2 H), 5.97 (dd,  $J = 15.2$  Hz,  $J = 10.6$  Hz, 1 H), 6.18 (d,  $J = 14.3$  Hz, 1 H), 6.98 (dd,  $J = 14.3$  Hz,  $J = 10.5$  Hz, 1 H);  $^{13}\text{C}$  NMR (75.48 MHz,  $\text{CDCl}_3$ )  $\delta = -4.4, -3.9, 18.6, 26.3, 27.8, 34.2, 42.1, 52.0, 73.2, 128.8, 132.5, 132.7, 134.6, 145.8, 173.8$ ; HR-MS (ESI): found  $m/z = 473.0979$  ( $\text{C}_{18}\text{H}_{31}\text{IO}_3\text{SiNa}$ ), calculated  $m/z = 473.0985$ .

**(*S,4E,8E,10E,12E,14E*)-methyl-6-(tert-butyldimethylsilyloxy)-15-(4,4,5,5-tetra-methyl-1,3,2-dioxaborolan-2-yl)pentadeca-4,8,10,12,14-pentaenoate **20****

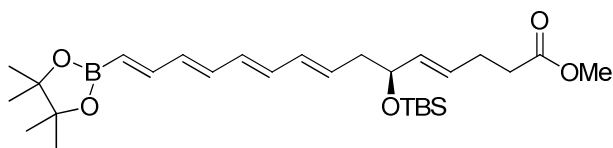

**20**

The following process was executed in the dark. PdCl<sub>2</sub>(CH<sub>3</sub>CN)<sub>2</sub> (6.25 mg, 24.1 μmol, 5.0 mol%) was added to a solution of the iodide **19** (217.0 mg, 482 μmol, 1.0 eq.) and the stannane **2a** (325 mg, 963 μmol, 2.0 eq.) in degassed, anhydrous DMF (1.7 mL). After stirring for 4 h the reaction mixture was diluted with diethyl ether (10 mL) and washed with a concentrated aqueous solution of NH<sub>4</sub>Cl (20 mL). The organic phase was separated and the aqueous phase was extracted with diethyl ether (3 x 10 mL). The combined organic extracts were dried over MgSO<sub>4</sub>, filtered and concentrated under reduced pressure. Purification by column chromatography (SiO<sub>2</sub>, petroleum ether/ethyl acetate, 40:1-20:1) afforded the product **20** (194 mg, 385 μmol, 80%) as a yellow oil with little impurities of Bu<sub>3</sub>SnI. R<sub>f</sub> = 0.21 (petroleum ether/ethyl acetate, 20:1); [α]<sup>22</sup><sub>D</sub> = +2.00 (c = 1.00, CHCl<sub>3</sub>); <sup>1</sup>H NMR (600.130 MHz, CDCl<sub>3</sub>): δ = 0.00 (s, 3 H), 0.02 (s, 3 H), 0.88 (m, 9 H), 1.28 (s, 12 H), 2.27 (m, 2 H), 2.36 (m, 4 H), 3.66 (s, 3 H), 4.10 (m, 1 H), 5.47 (dd, *J* = 15.3 Hz, *J* = 6.3 Hz, 1 H), 5.57 (m, 2 H), 5.72 (dt, *J* = 15.1, *J* = 7.6 Hz, 1 H), 6.10 (dd, *J* = 15.1 Hz, *J* = 10.6 Hz, 1 H), 6.17 (dd, *J* = 14.8 Hz, *J* = 10.8 Hz, 1 H), 6.28 (dd, *J* = 14.7 Hz, *J* = 10.6 Hz, 2 H), 6.38 (m, 1 H), 7.04 (dd, *J* = 17.7 Hz, *J* = 10.6 Hz, 1 H); <sup>13</sup>C NMR (75.48 MHz, CDCl<sub>3</sub>): δ = -4.8, -4.4, 13.6, 17.5, 24.6, 24.8, 25.8, 26.8, 27.8, 33.8, 42.1, 51.5, 73.1, 83.2, 128.2, 130.7, 132.6, 132.6, 133.8, 134.3, 135.3, 136.7, 149.7, 173.4; HR-MS (ESI): found *m/z* = 525.3187 (C<sub>28</sub>H<sub>47</sub>O<sub>5</sub>SiNa), calculated *m/z* = 525.3183.

**(*S,4E,8E,10E,12E,16E*)-methyl 6-hydroxy-17-(4,4,5,5-tetramethyl-1,3,2-dioxaborolan-2-yl)heptadeca-4,8,10,12,16-pentaenoate 21**

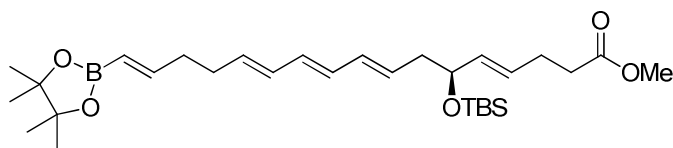

**21**

The following process was executed in the dark. PdCl<sub>2</sub>(CH<sub>3</sub>CN)<sub>2</sub> (1.44 mg, 5.55 μmol, 5.0 mol%) was added to a solution of the iodide **19** (50.0 mg, 111 μmol, 1.0 eq.) and the stannane **3a** (55.2 mg, 111 μmol, 1.0 eq.) in degassed, anhydrous DMF (400 μL) in an amber glass septum vial. After stirring for 4 h the reaction mixture was diluted with 6 mL of diethyl ether and washed with saturated aqueous solution of NH<sub>4</sub>Cl (6 mL). The organic phase was separated and the aqueous phase was extracted with diethyl ether (3 x 5 mL). The combined organic layers were dried over MgSO<sub>4</sub>, filtered and concentrated under reduced pressure. Purification by column chromatography (SiO<sub>2</sub>, petroleum ether/ethyl acetate, 40:1-20:1) afforded the product **21** (40.1 mg, 75.6 μmol, 68%) as a slightly yellow liquid. R<sub>f</sub> = 0.21 (petroleum ether/ethyl acetate, 20:1); [α]<sup>22</sup><sub>D</sub> = +7.60 (c = 1.00, CHCl<sub>3</sub>); <sup>1</sup>H NMR (300.132 MHz, CDCl<sub>3</sub>): δ = 0.00 (s, 3 H), 0.02 (s, 3 H), 0.88 (s, 9 H), 1.27 (s, 12 H), 2.24 (m, 6 H), 2.36 (m, 4 H), 3.67 (s, 3 H), 4.07 (q, *J* = 6.1 Hz, 1 H), 5.57 (m, 5 H), 6.09 (m, 4 H), 6.63 (dt, *J* = 18.0 Hz, *J* = 5.8 Hz, 1 H); <sup>13</sup>C NMR (75.57 MHz, CDCl<sub>3</sub>): δ = -4.8, -4.4, 18.2, 24.8, 25.9, 27.4, 31.4, 33.8, 35.5, 42.1, 51.5, 73.3, 83.0, 128.0, 130.2, 130.8, 131.0, 131.2, 132.6, 133.4, 153.4, 173.4; HR-MS (ESI): *m/z* = 553.3504 (C<sub>30</sub>H<sub>51</sub>B<sub>0</sub>S<sub>1</sub>SiNa), calculated *m/z* = 553.3497.

**(*4E,6S,8E,10E,12E,14E,16E,18R,19S*)-Methyl-6,18-bis((tert-butyl)dimethylsilyloxy)-20-((4-methoxybenzyl)oxy)-19-methyl-icos-4,8,10,12,14,16-hexaenoate 22**

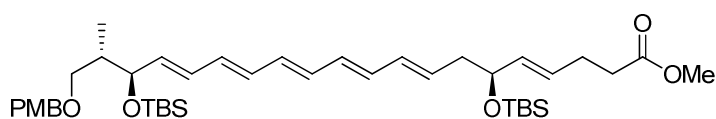

**22**



water (10 mL) was added to the reaction mixture. After separation of the organic phase the aqueous phase was extracted with diethyl ether (3 x 10 mL). The combined organic layers were dried over MgSO<sub>4</sub> and concentrated under reduced pressure. After purification by column chromatography (SiO<sub>2</sub>, petroleum ether/ethyl acetate, 40:1) the product **23** (8.40 mg, 11.2 μmol, 83%) was obtained as a clear, slightly yellow liquid.  $R_f = 0.33$  (petroleum ether/ethyl acetate, 40:1);  $[\alpha]^{22}_D = +76.1$  (c = 1.00, CHCl<sub>3</sub>); <sup>1</sup>H NMR (600.130 MHz, CDCl<sub>3</sub>):  $\delta = 0.00$  (s, 3 H), 0.01 (s, 3 H), 0.03 (s, 6 H), 0.88 (s, 21 H), 1.91 (dq,  $J = 12.8$  Hz,  $J = 6.5$  Hz, 1 H), 2.22 (m, 6 H), 2.35 (t,  $J = 6.2$  Hz, 2 H), 2.39 (m, 2 H), 3.30 (dd,  $J = 9.1$  Hz,  $J = 6.7$  Hz, 1 H), 3.43 (dd,  $J = 9.0$  Hz,  $J = 5.9$  Hz, 1 H), 3.67 (s, 3 H), 3.81 (s, 3 H), 4.08 (m, 1 H), 4.12 (t,  $J = 6.5$  Hz, 1 H), 4.38 (d,  $J = 11.6$  Hz, 1 H), 4.44 (d,  $J = 11.6$  Hz, 1 H), 5.47 (m, 2 H), 5.62 (m, 4 H), 6.06 (m, 6 H), 6.88 (d,  $J = 8.5$  Hz, 2 H), 7.26 (d,  $J = 9.9$  Hz, 2 H); <sup>13</sup>C NMR (150.90 MHz, CDCl<sub>3</sub>):  $\delta = -4.9, -4.8, -4.4, -4.1, 13.0, 18.2, 18.2, 25.9, 25.9, 27.4, 32.5, 32.5, 33.8, 40.4, 42.1, 51.5, 55.2, 72.1, 72.6, 73.3, 74.7, 113.7, 128.0, 129.1, 130.2, 130.2, 130.8, 130.9, 130.9, 131.0, 131.1, 132.6, 132.6, 133.1, 133.5, 134.3, 159.0, 173.5$ ; HR-MS (ESI):  $m/z = 775.4757$  (C<sub>44</sub>H<sub>72</sub>O<sub>6</sub>Si<sub>2</sub>Na), calculated  $m/z = 775.4759$ .

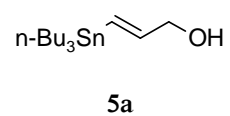

solvent: CDCl<sub>3</sub>  
nucleus: <sup>1</sup>H  
frequency: 300.132 MHz

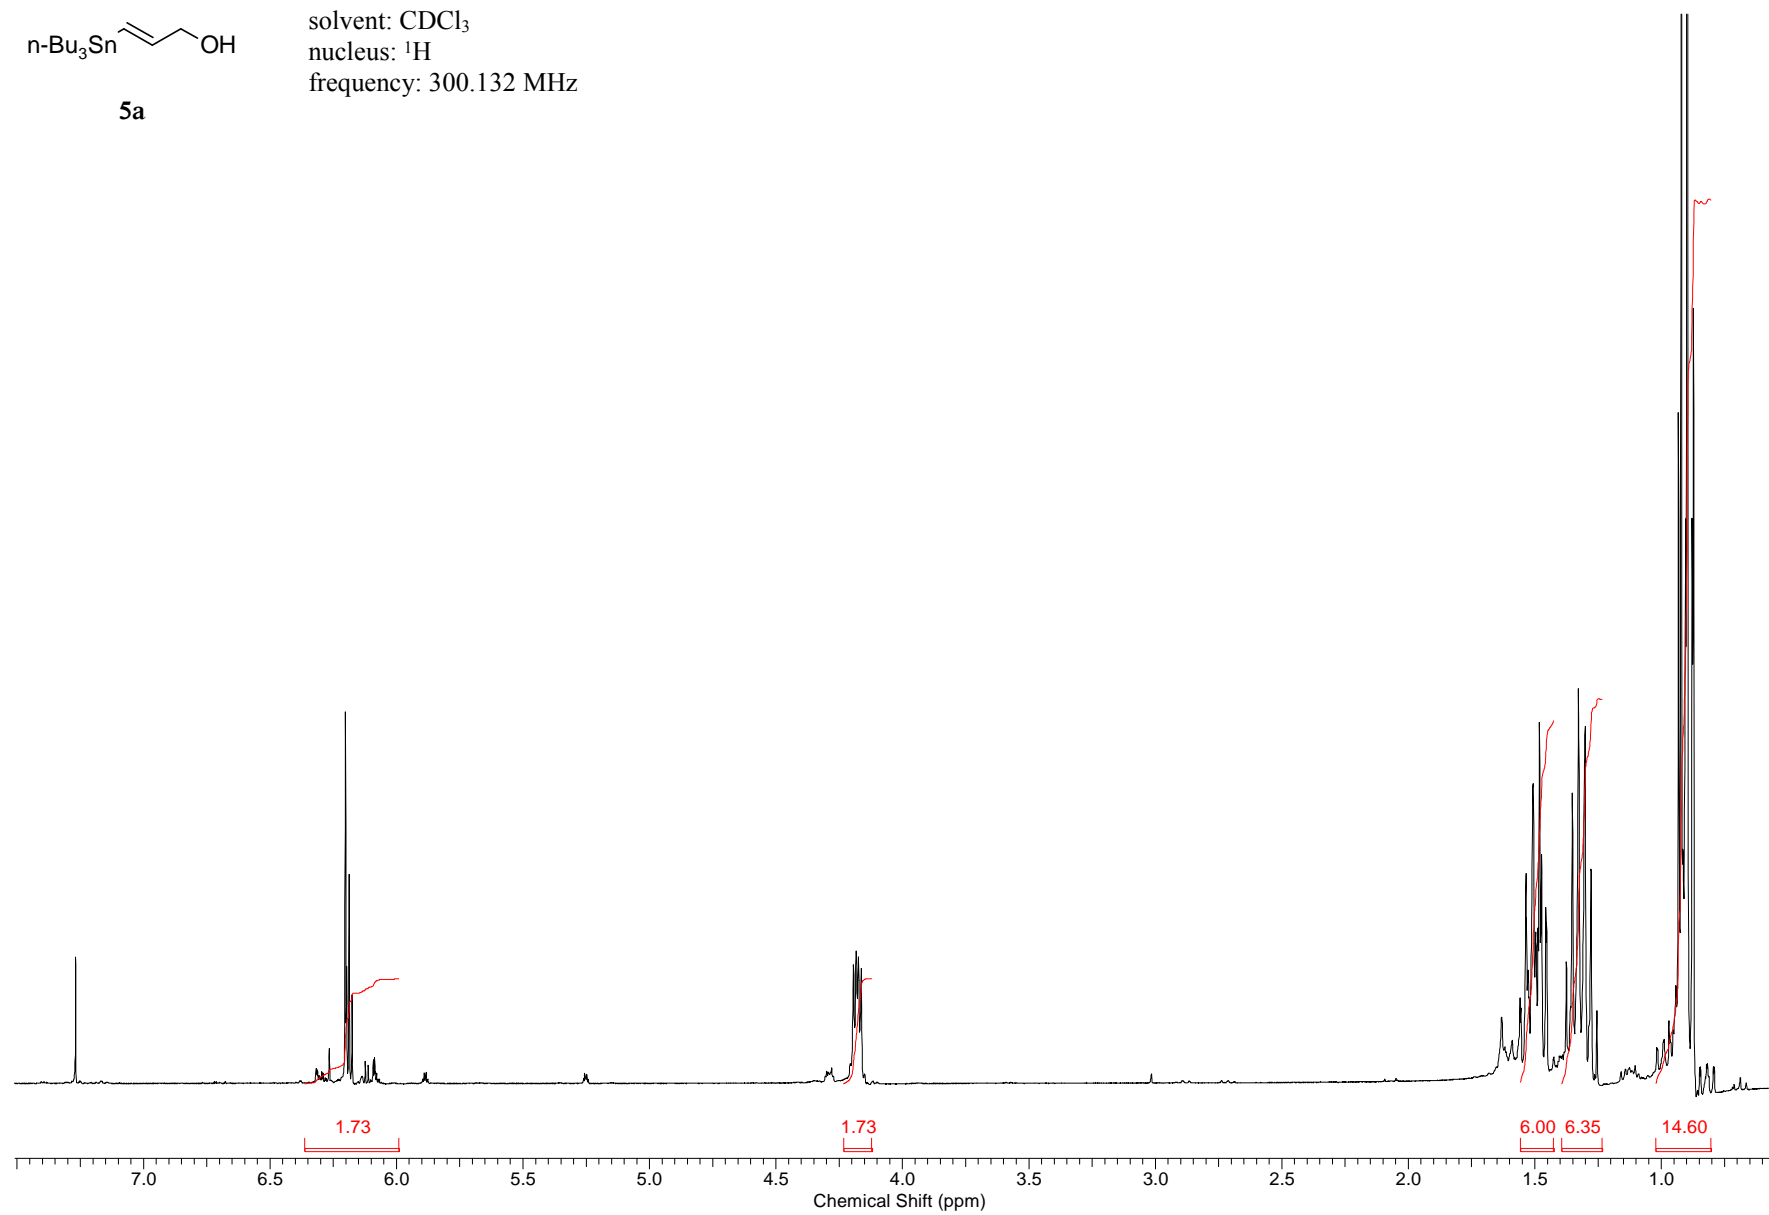

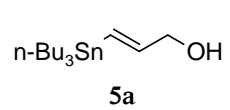

solvent: CDCl<sub>3</sub>  
nucleus: <sup>13</sup>C  
frequency: 75.48 MHz

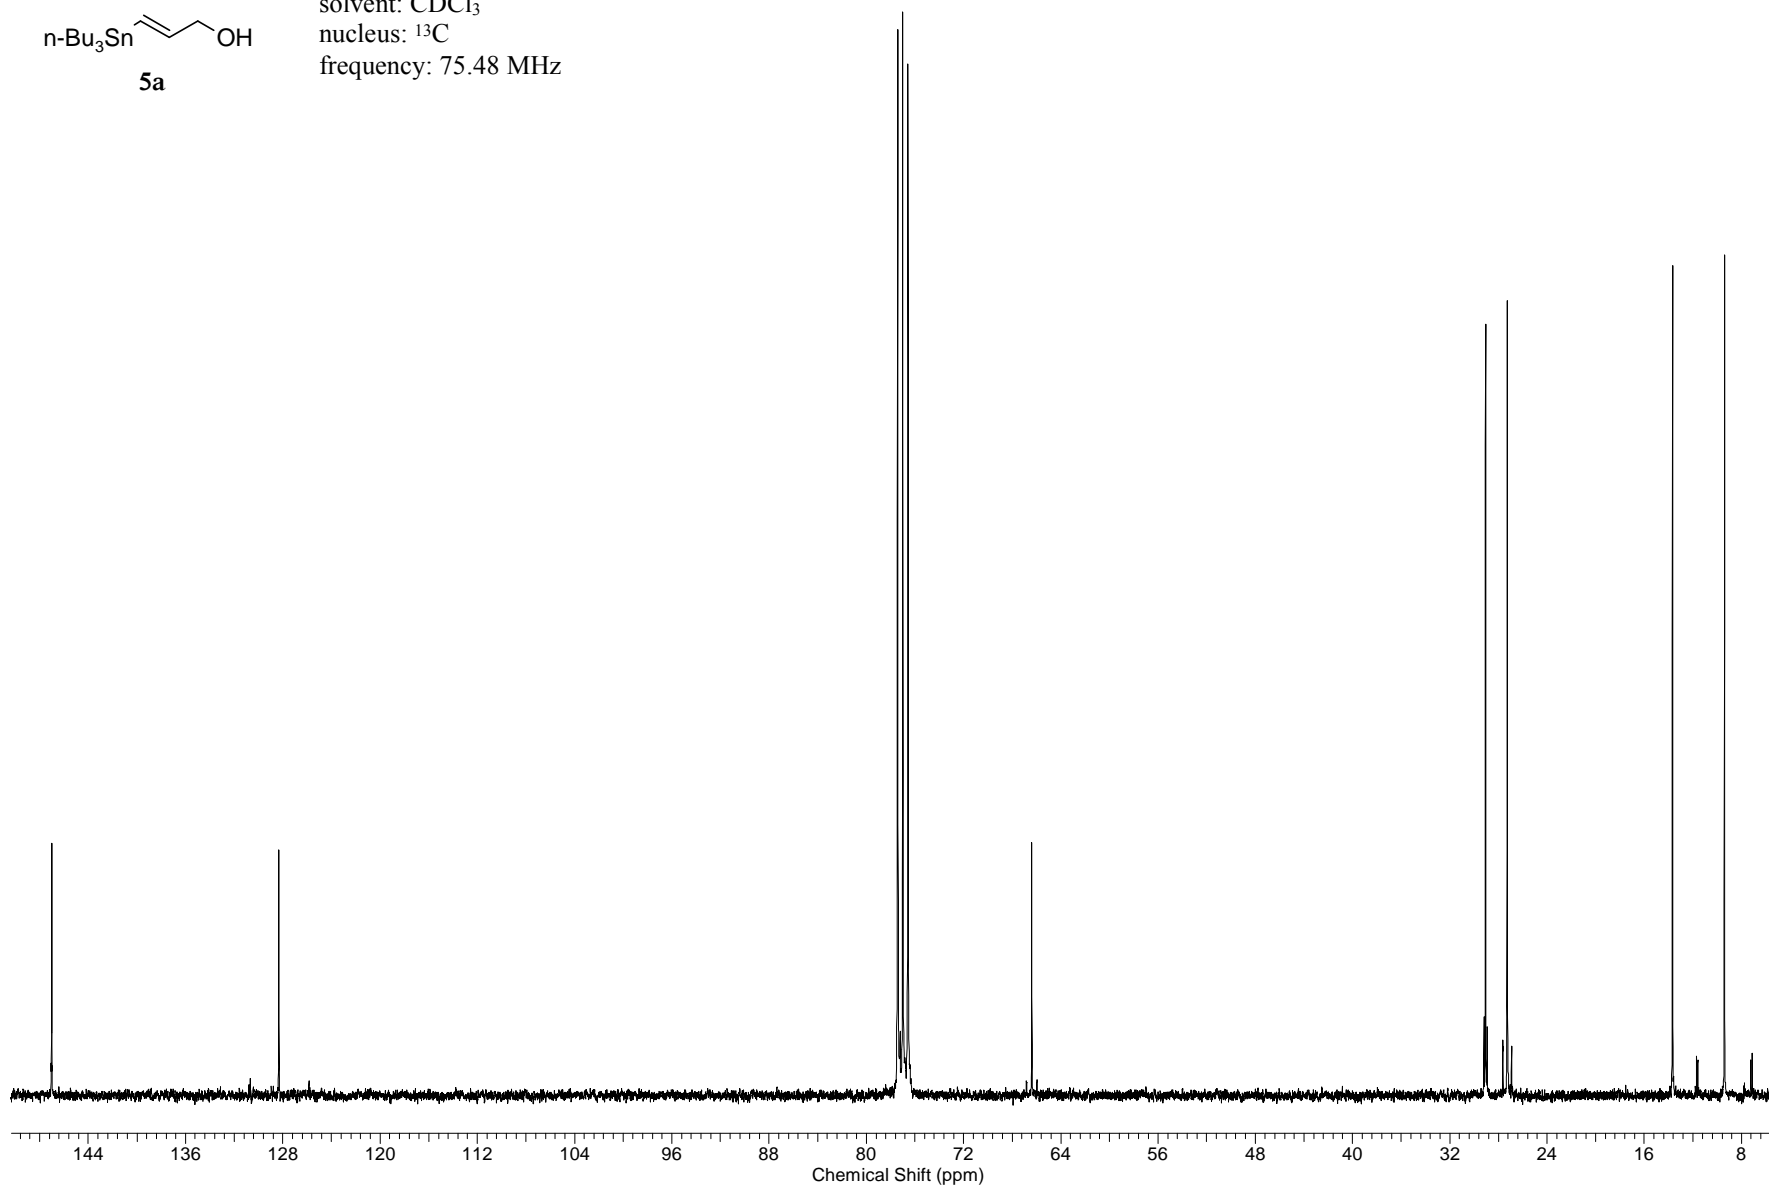



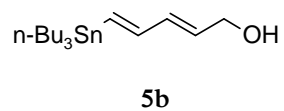

solvent: CDCl<sub>3</sub>  
nucleus: <sup>1</sup>H  
frequency: 300.132 MHz

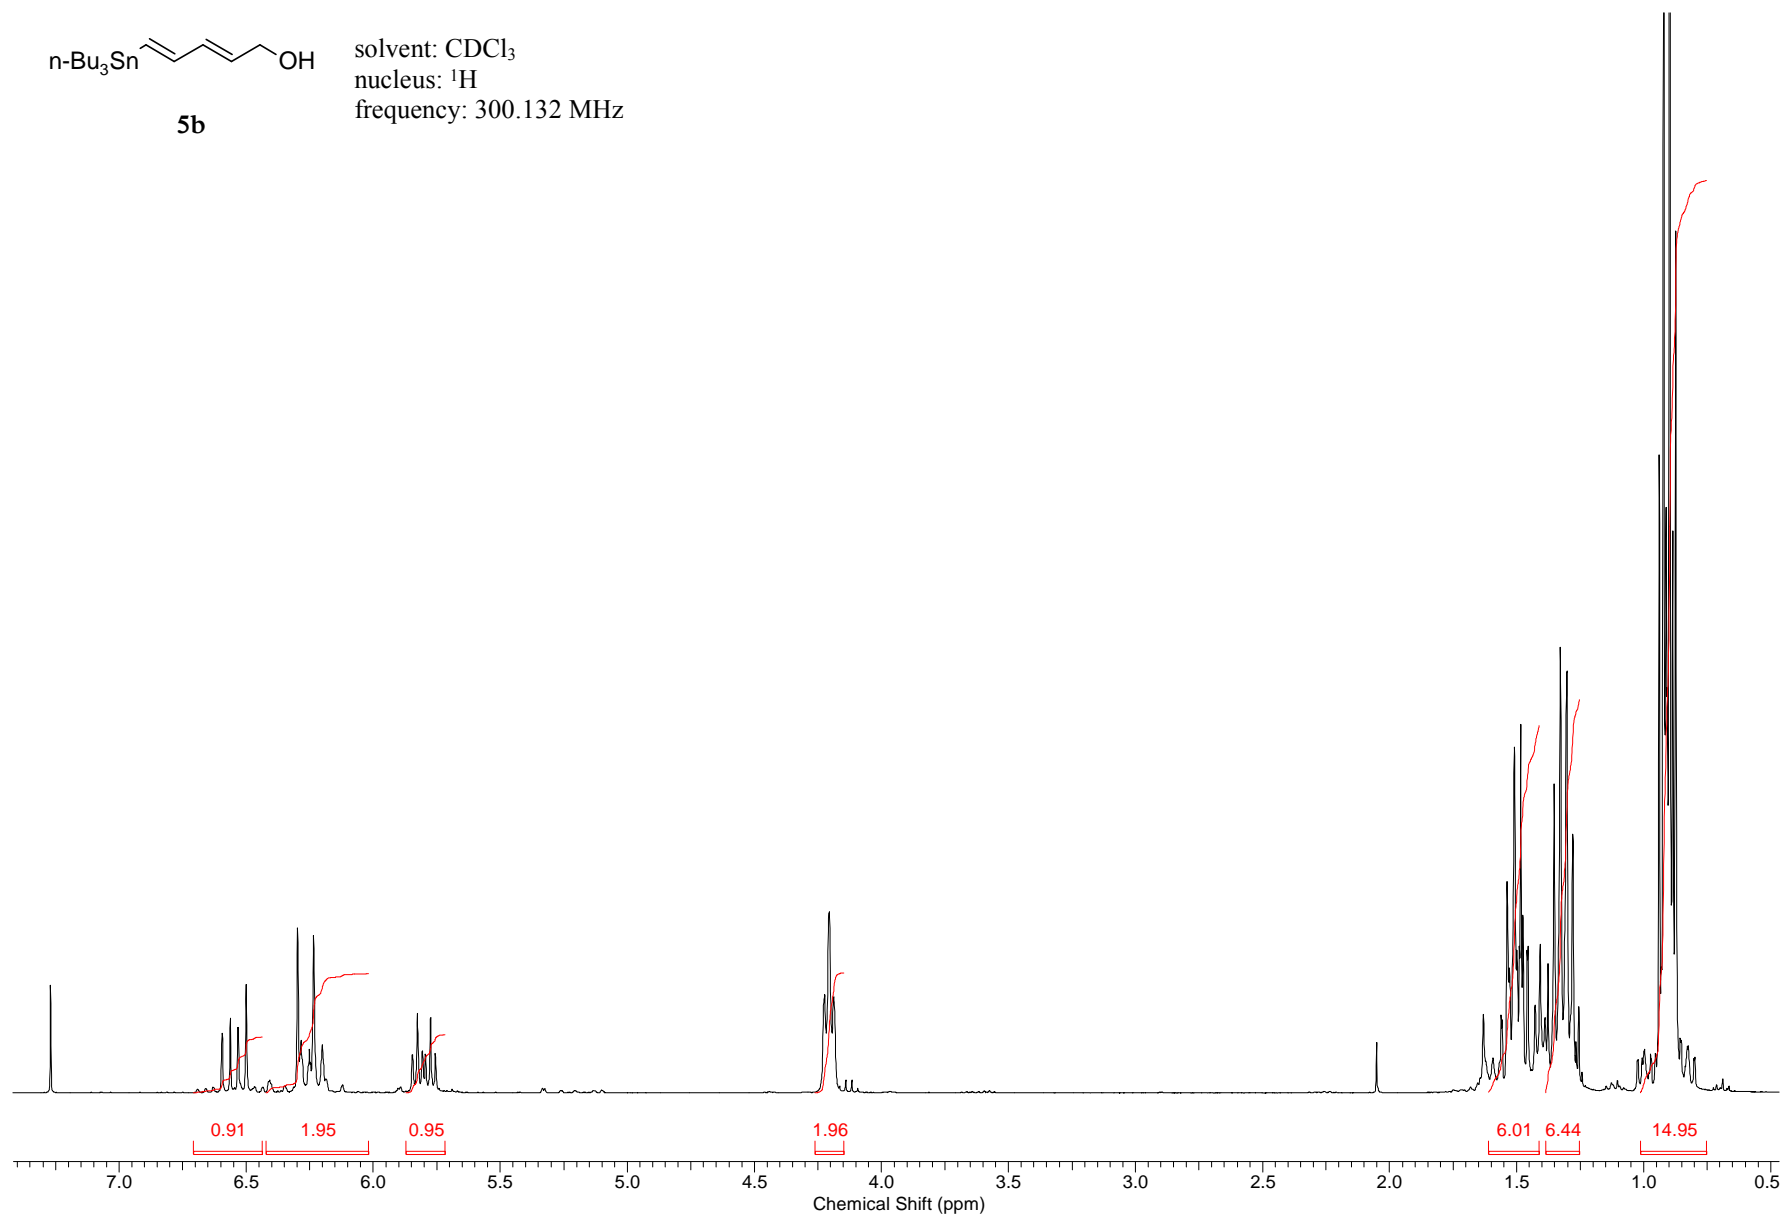

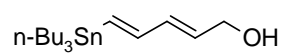

**5b**

solvent: CDCl<sub>3</sub>  
nucleus: <sup>13</sup>C  
frequency: 75.48 MHz

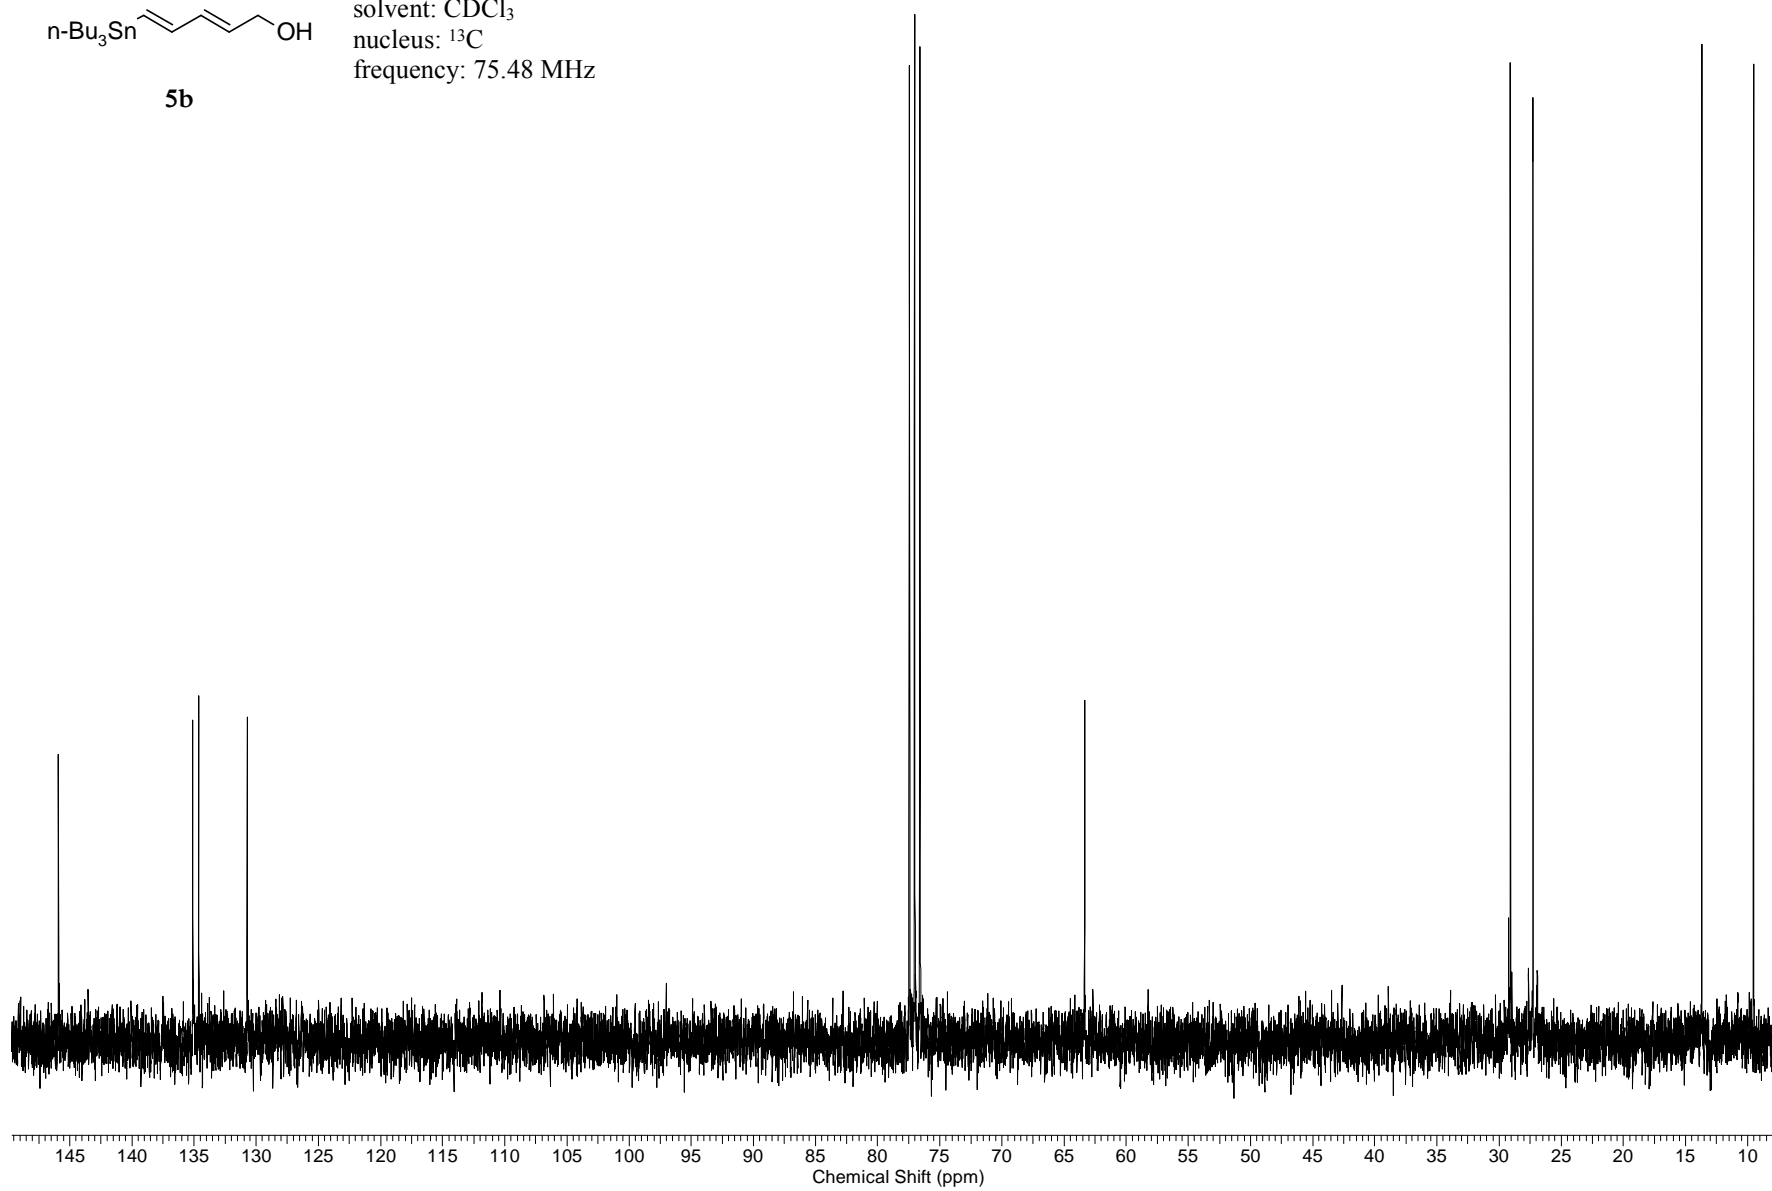

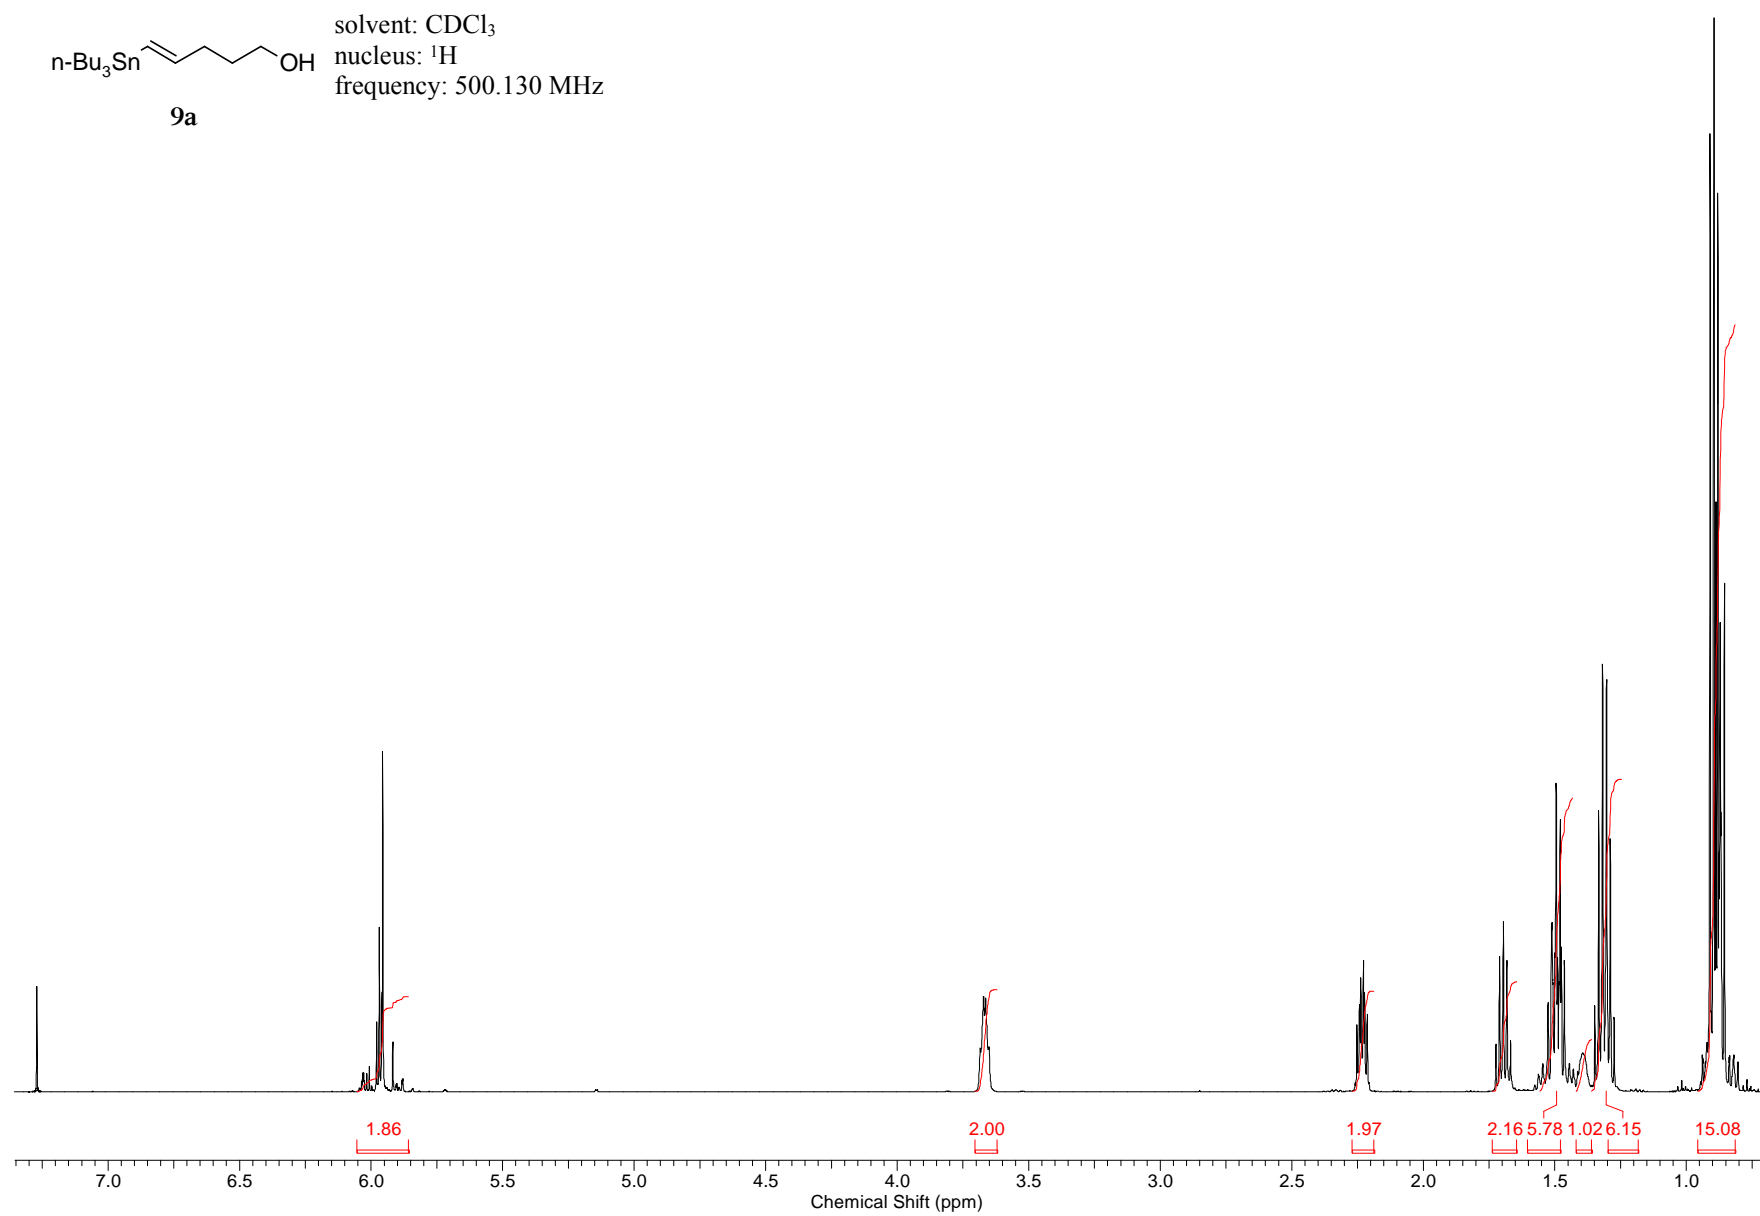

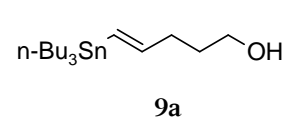

solvent: CDCl<sub>3</sub>  
nucleus: <sup>13</sup>C  
frequency: 125.78 MHz

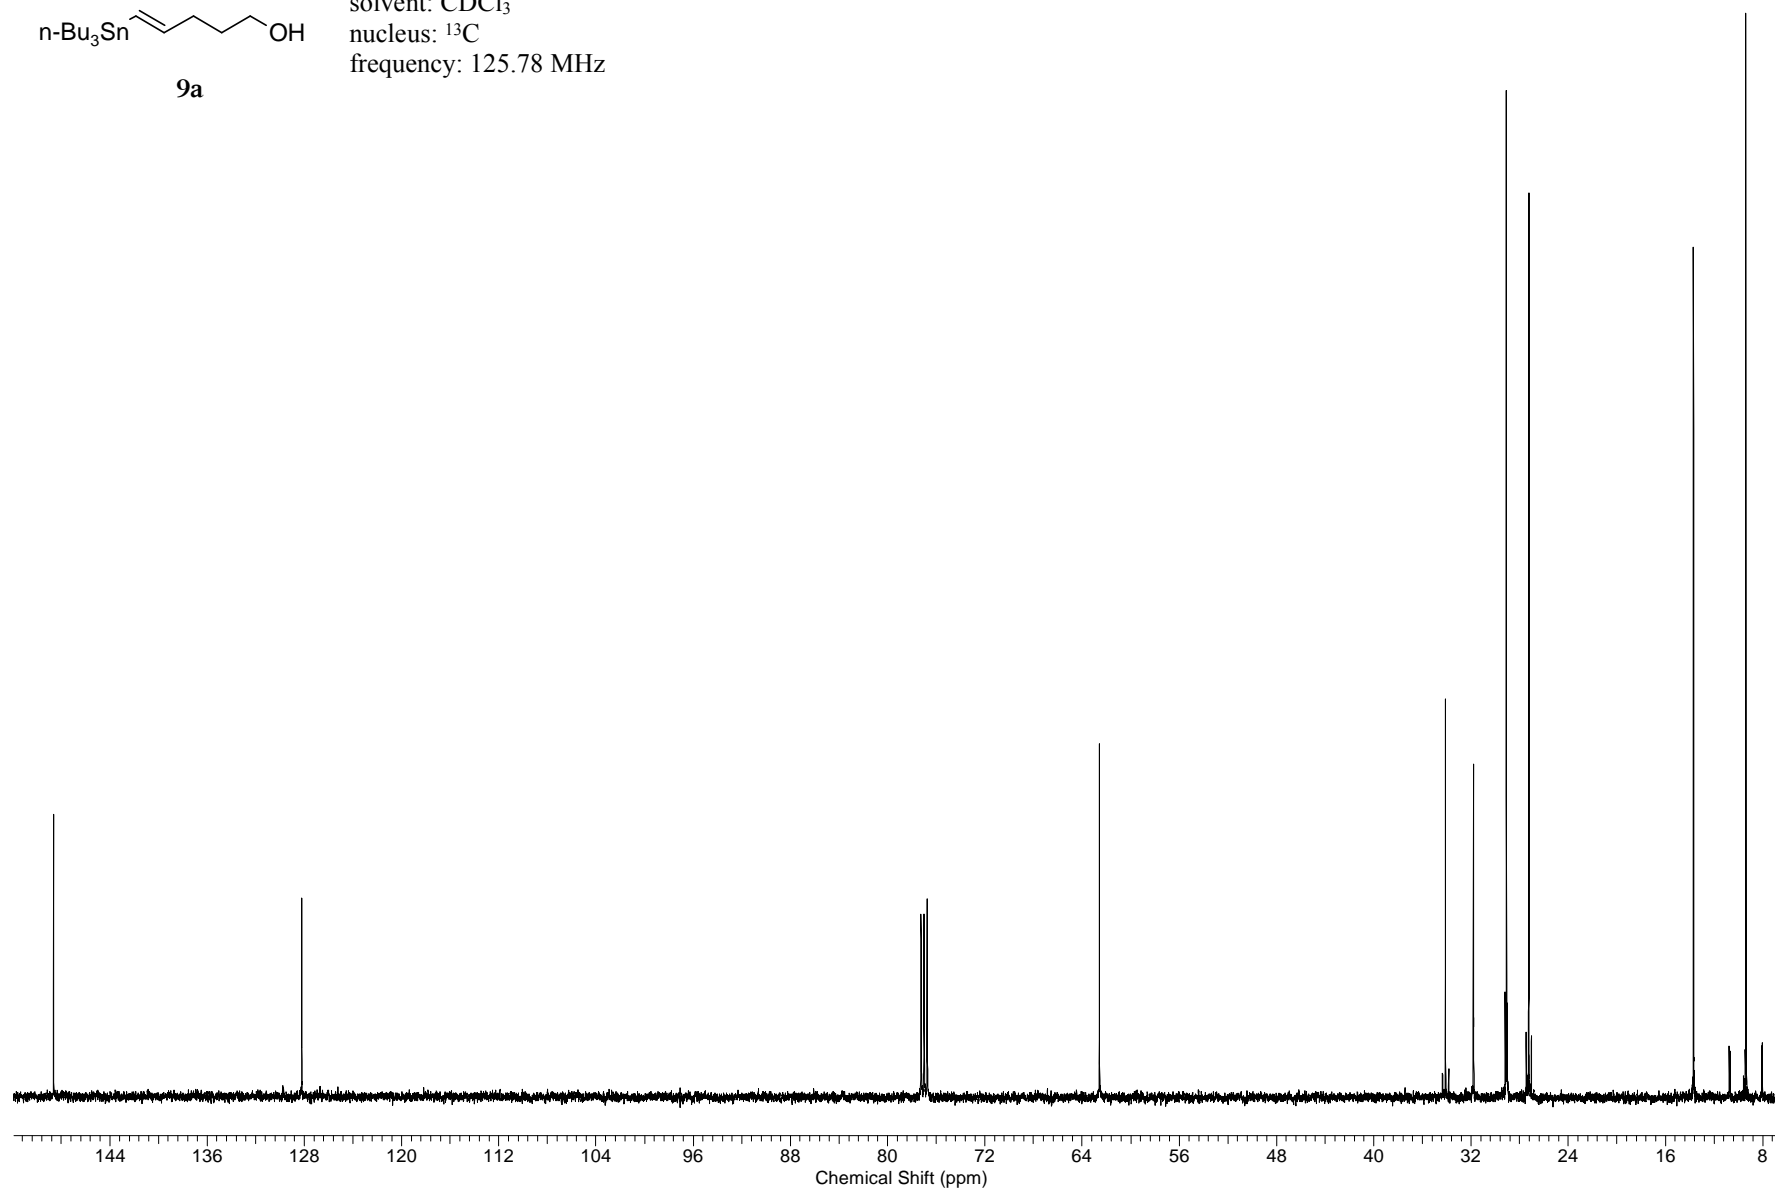

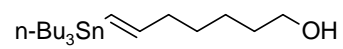

**9b**

solvent: CDCl<sub>3</sub>  
nucleus: <sup>1</sup>H  
frequency: 300.132 MHz

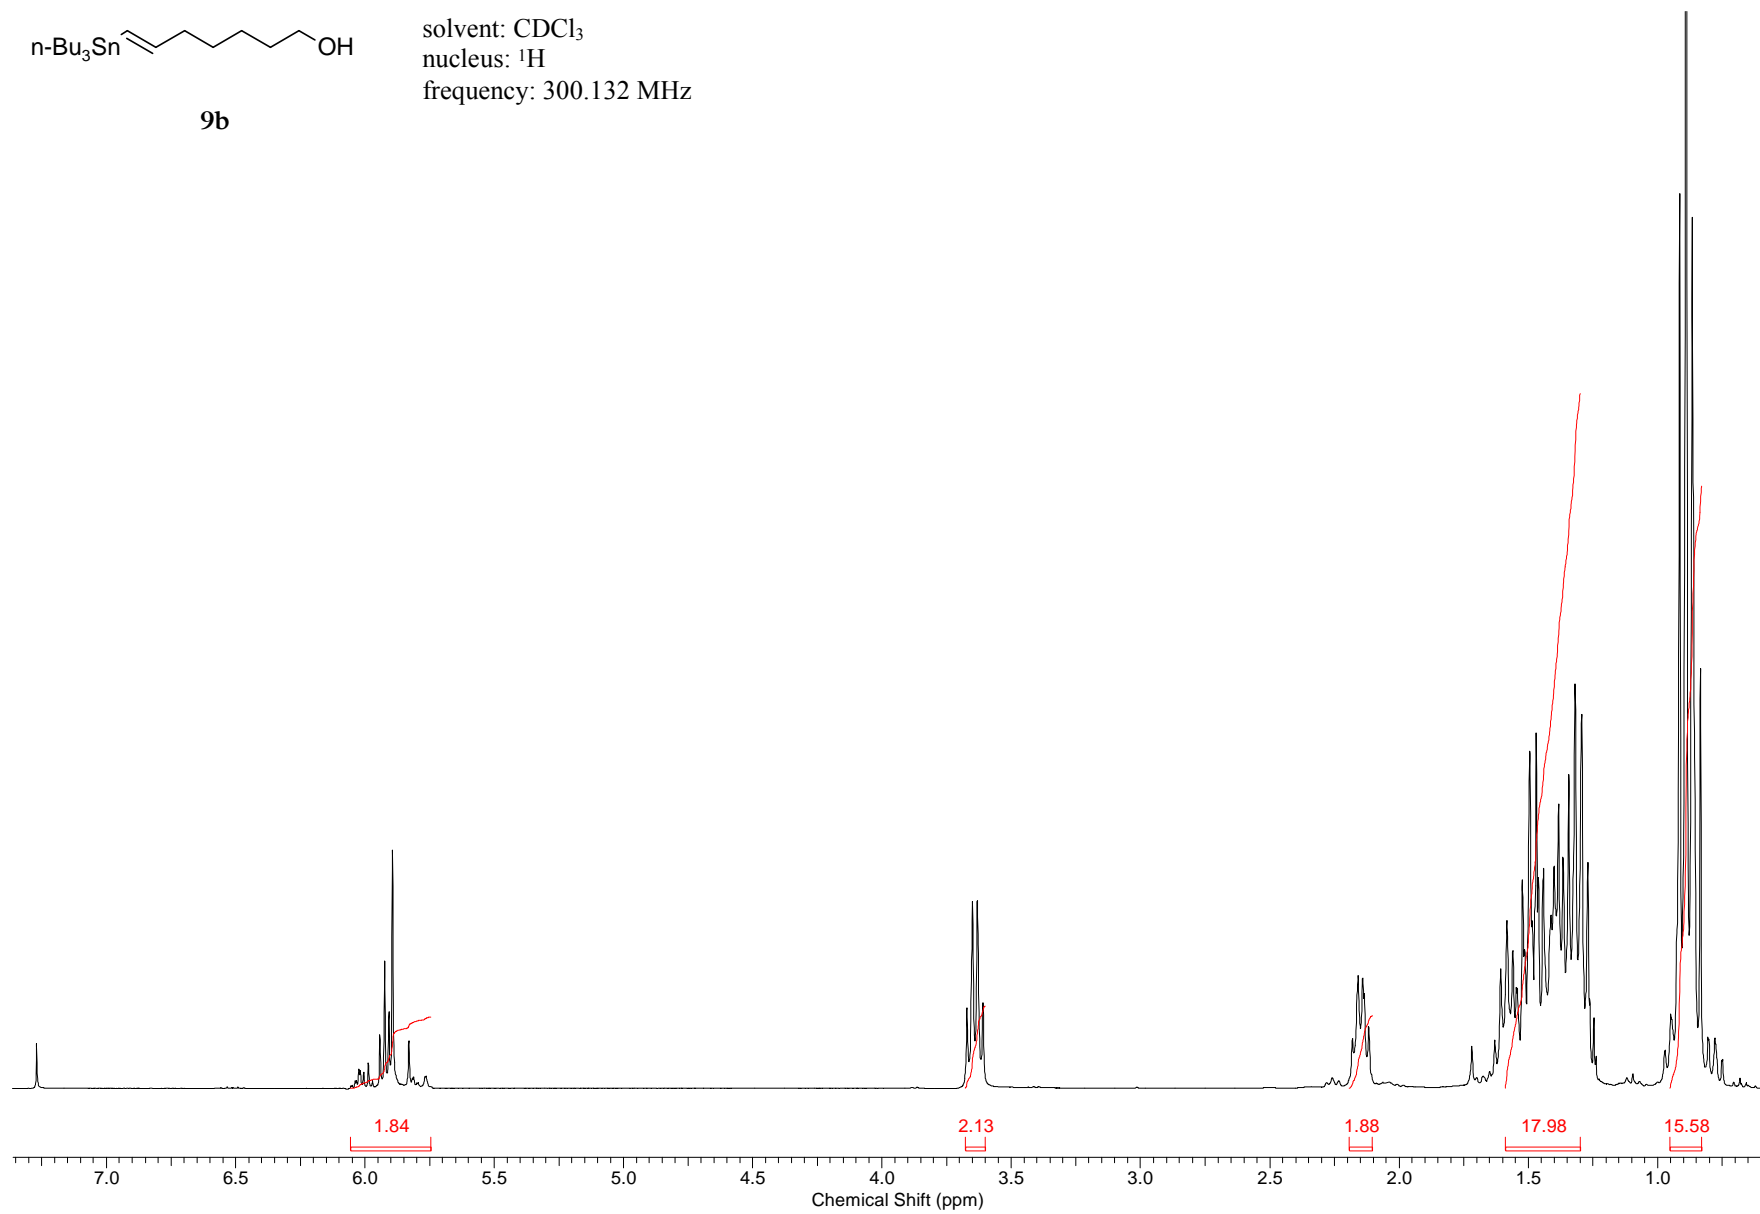

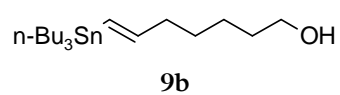

solvent: CDCl<sub>3</sub>  
nucleus: <sup>13</sup>C  
frequency: 75.48 MHz

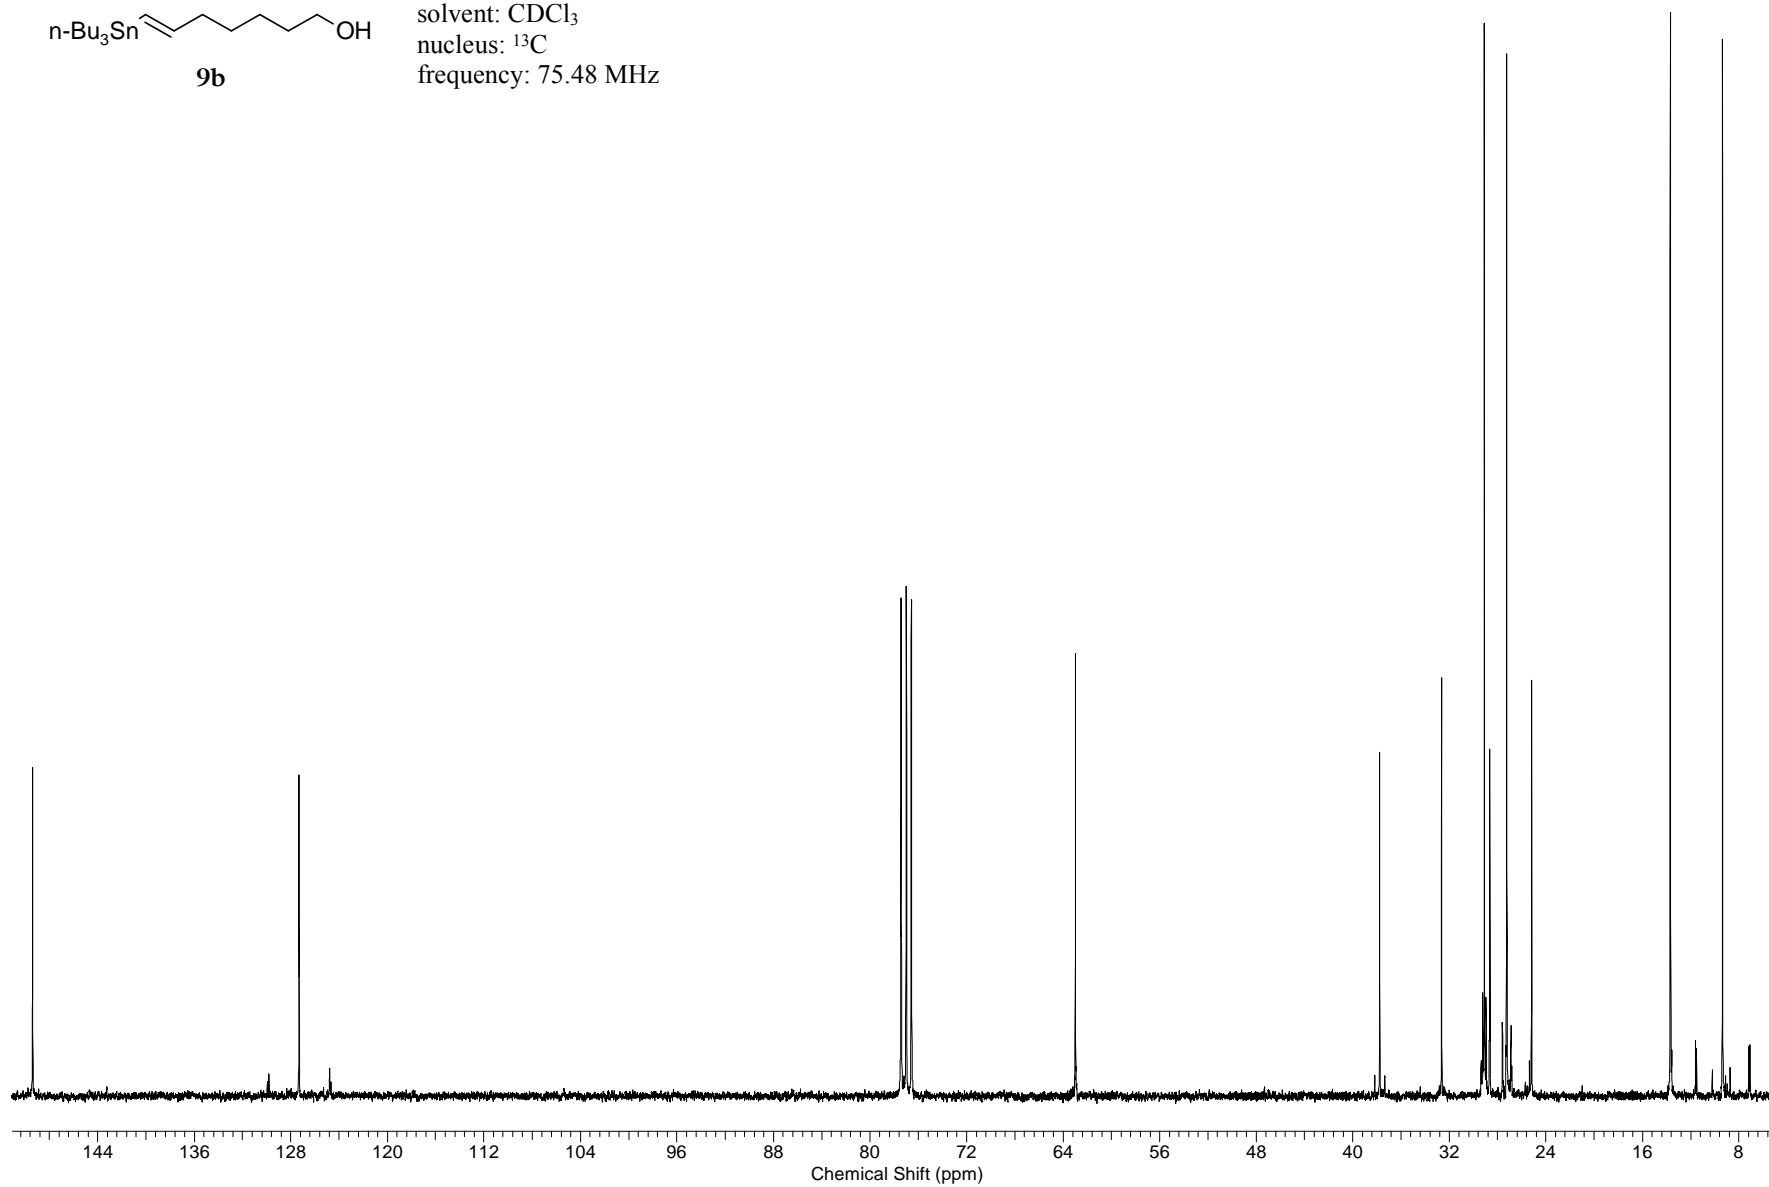

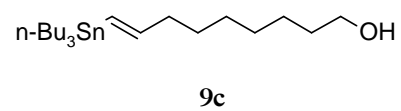

solvent:  $\text{CDCl}_3$   
nucleus:  $^1\text{H}$   
frequency: 300.132 MHz

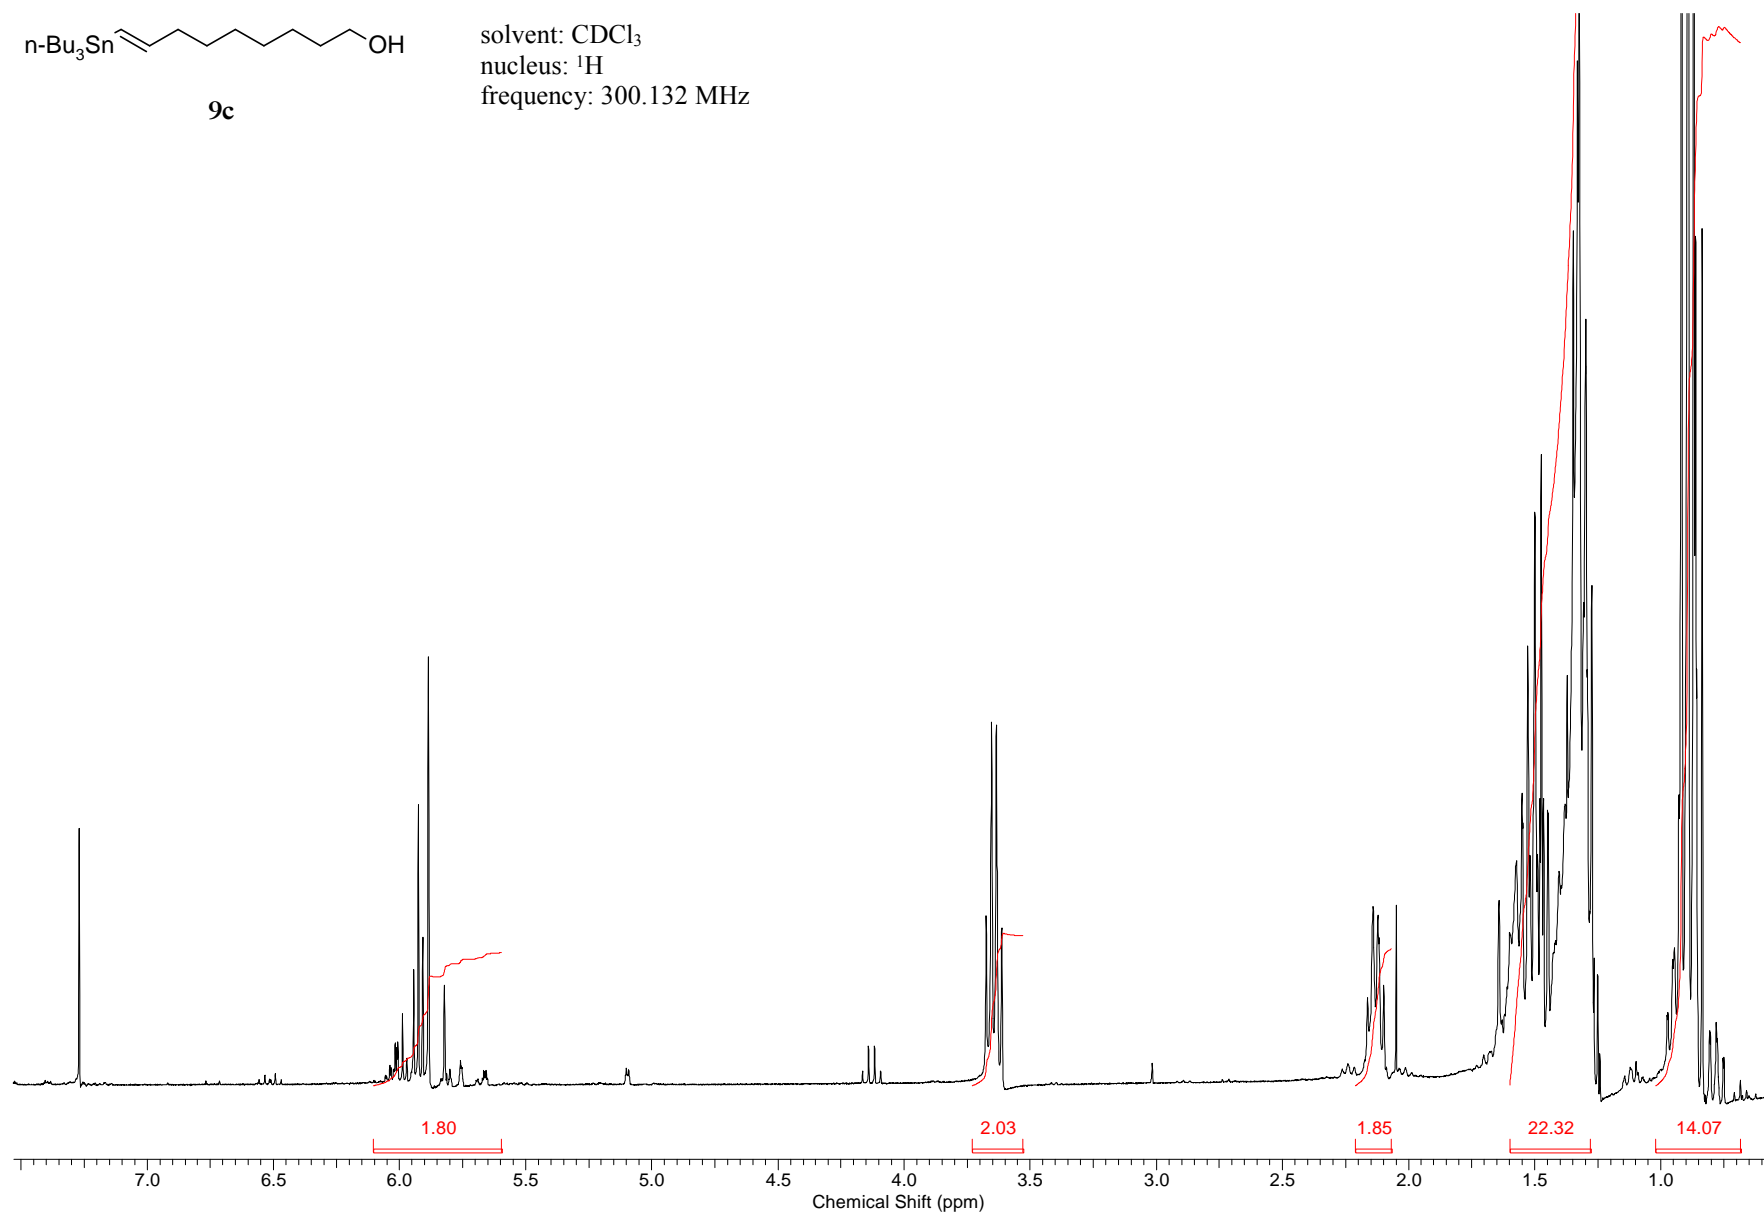

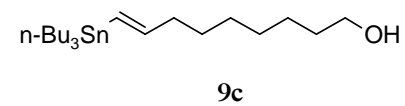

solvent: CDCl<sub>3</sub>  
nucleus: <sup>13</sup>C  
frequency: 75.48 MHz

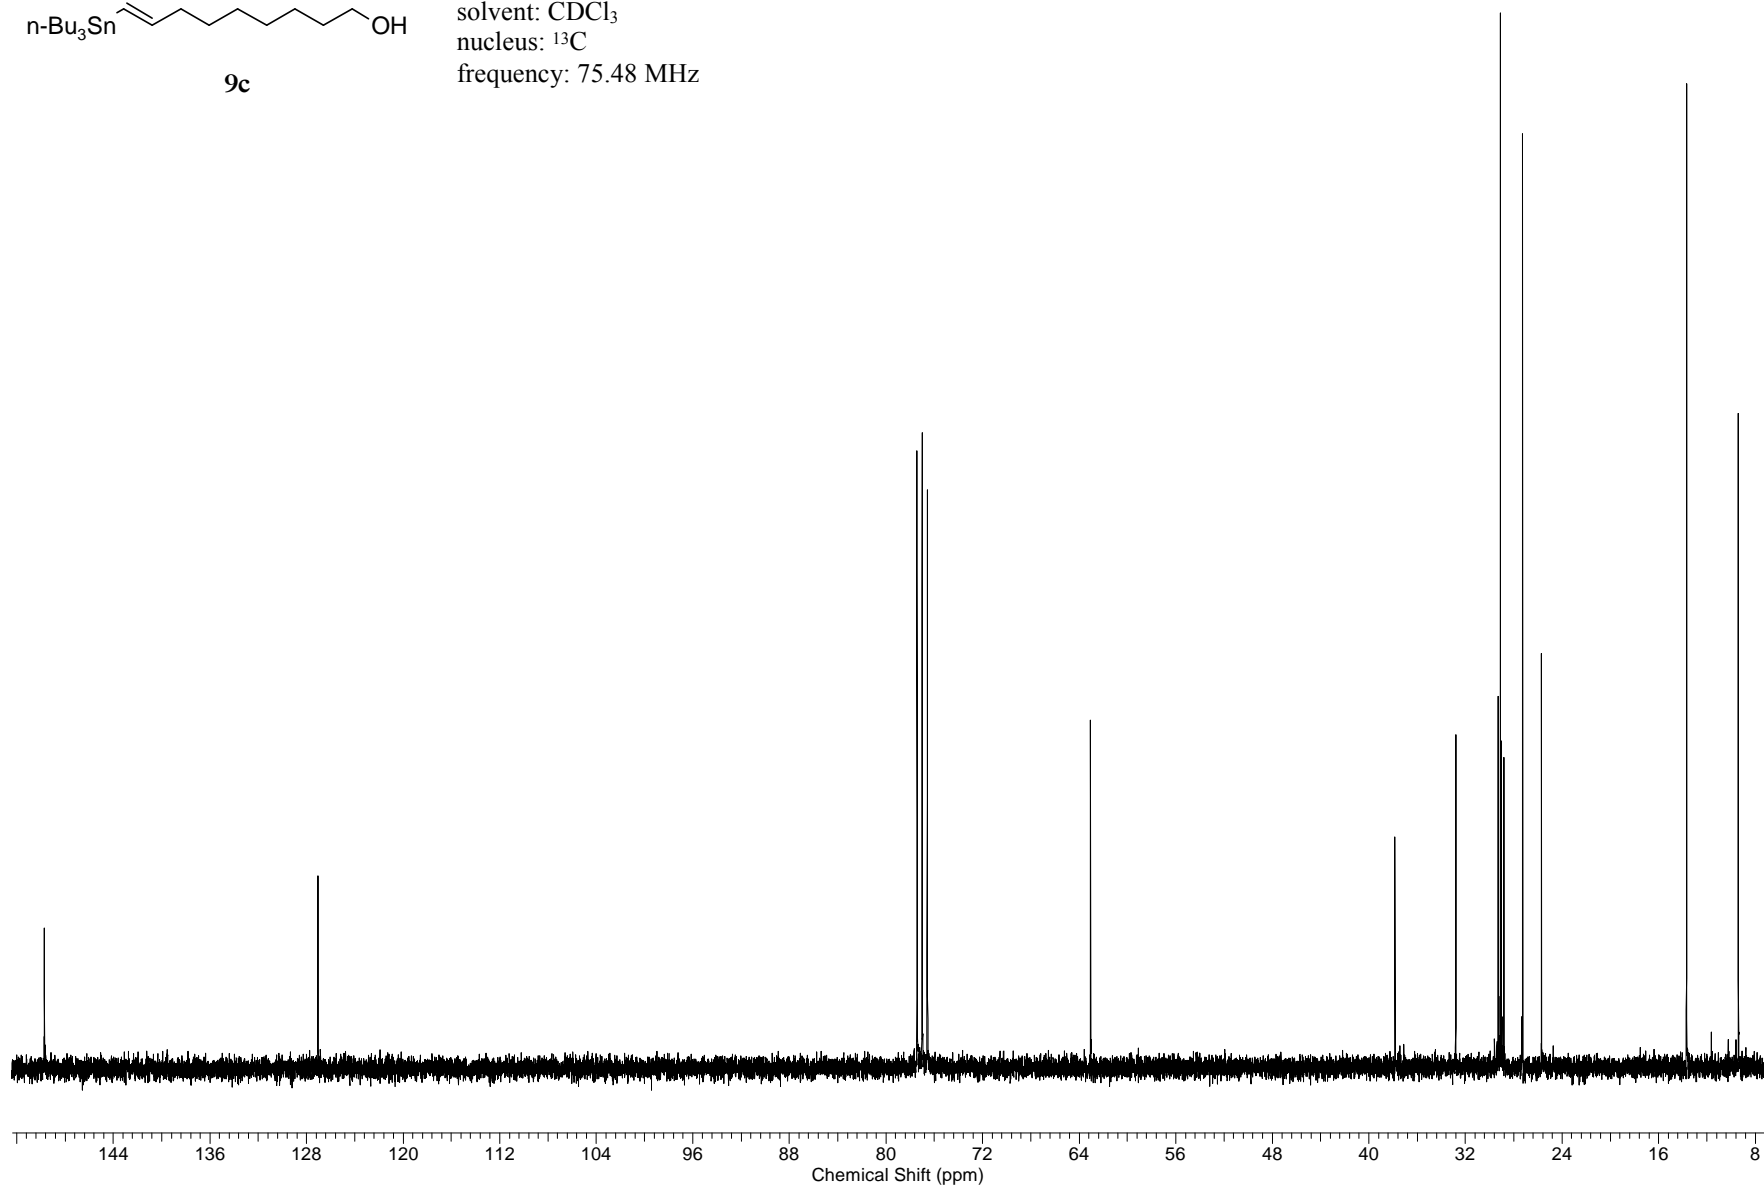



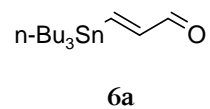

solvent: CDCl<sub>3</sub>  
nucleus: <sup>1</sup>H  
frequency: 300.132 MHz

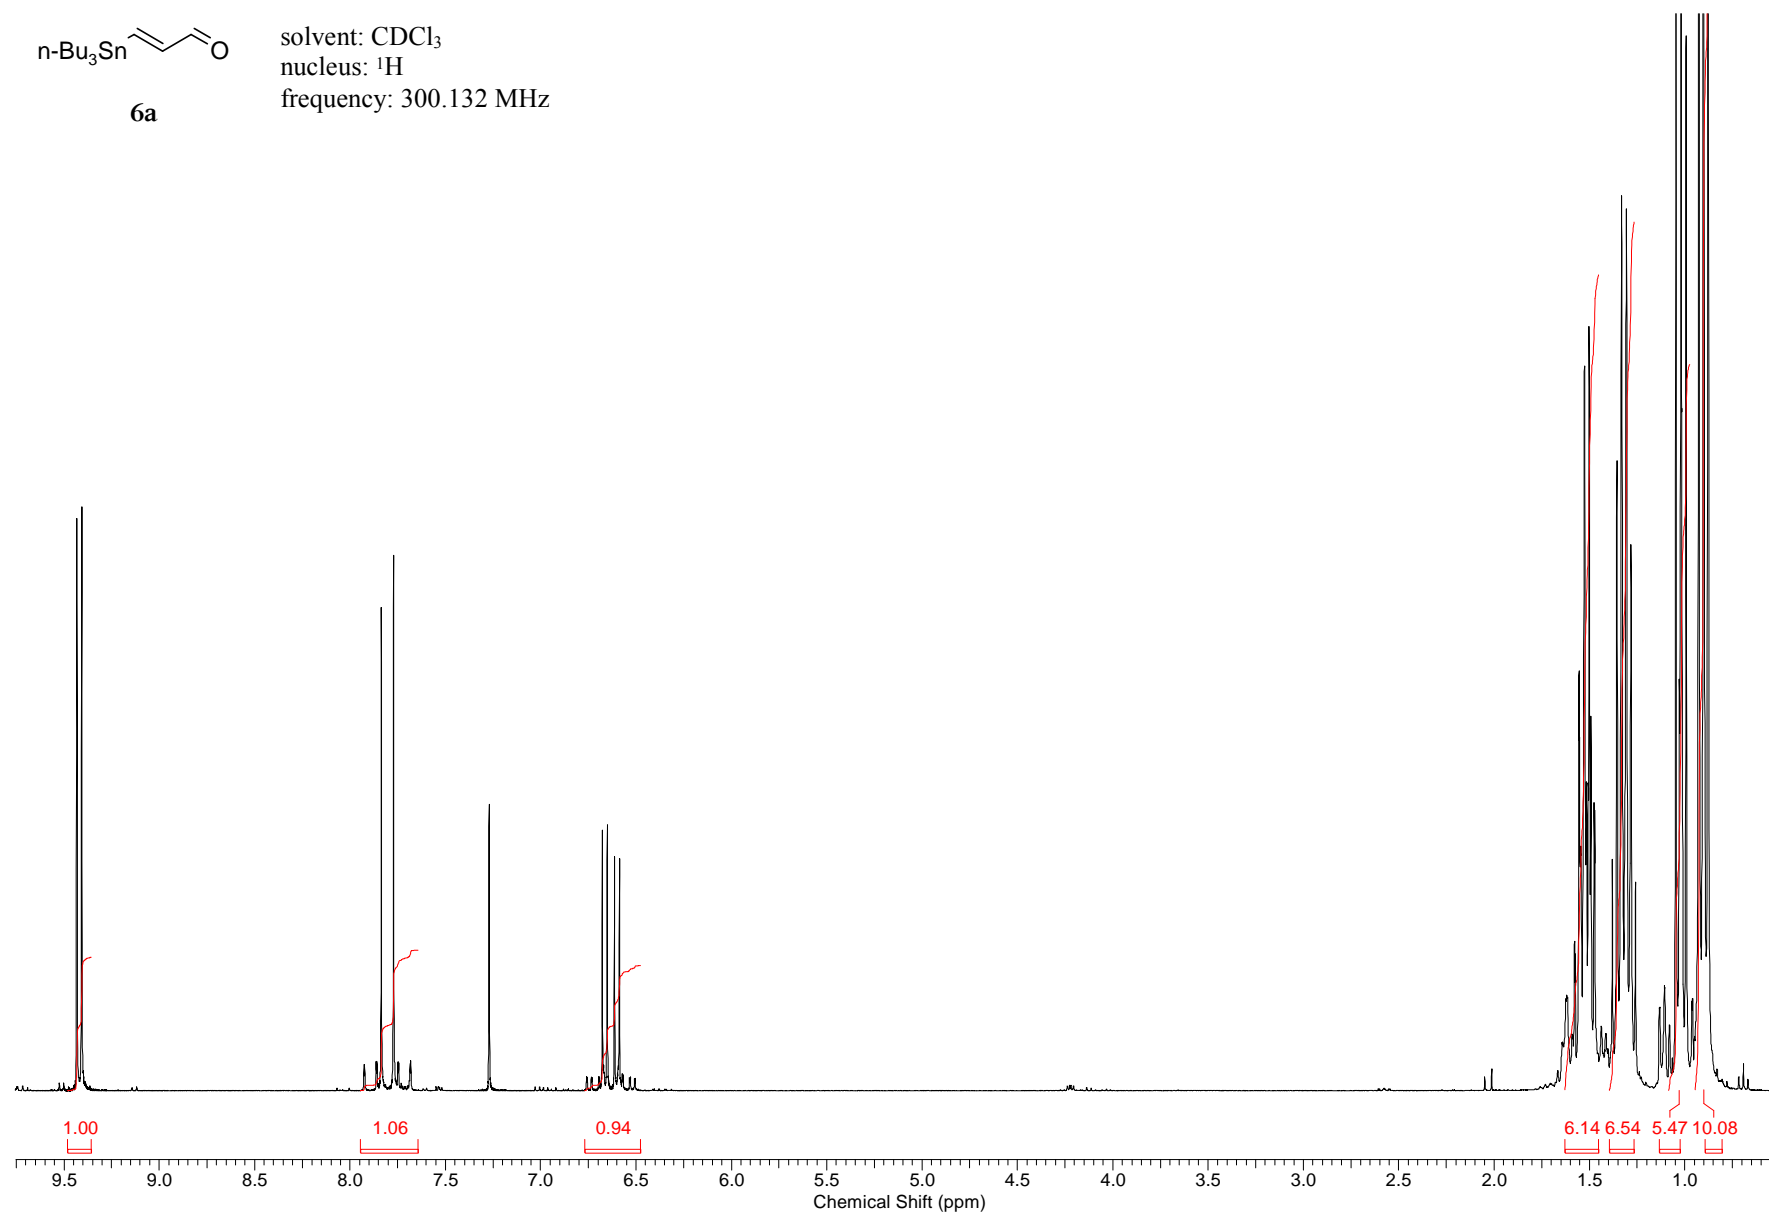

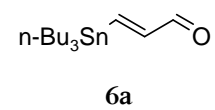

solvent: CDCl<sub>3</sub>  
nucleus: <sup>13</sup>C  
frequency: 75.48 MHz

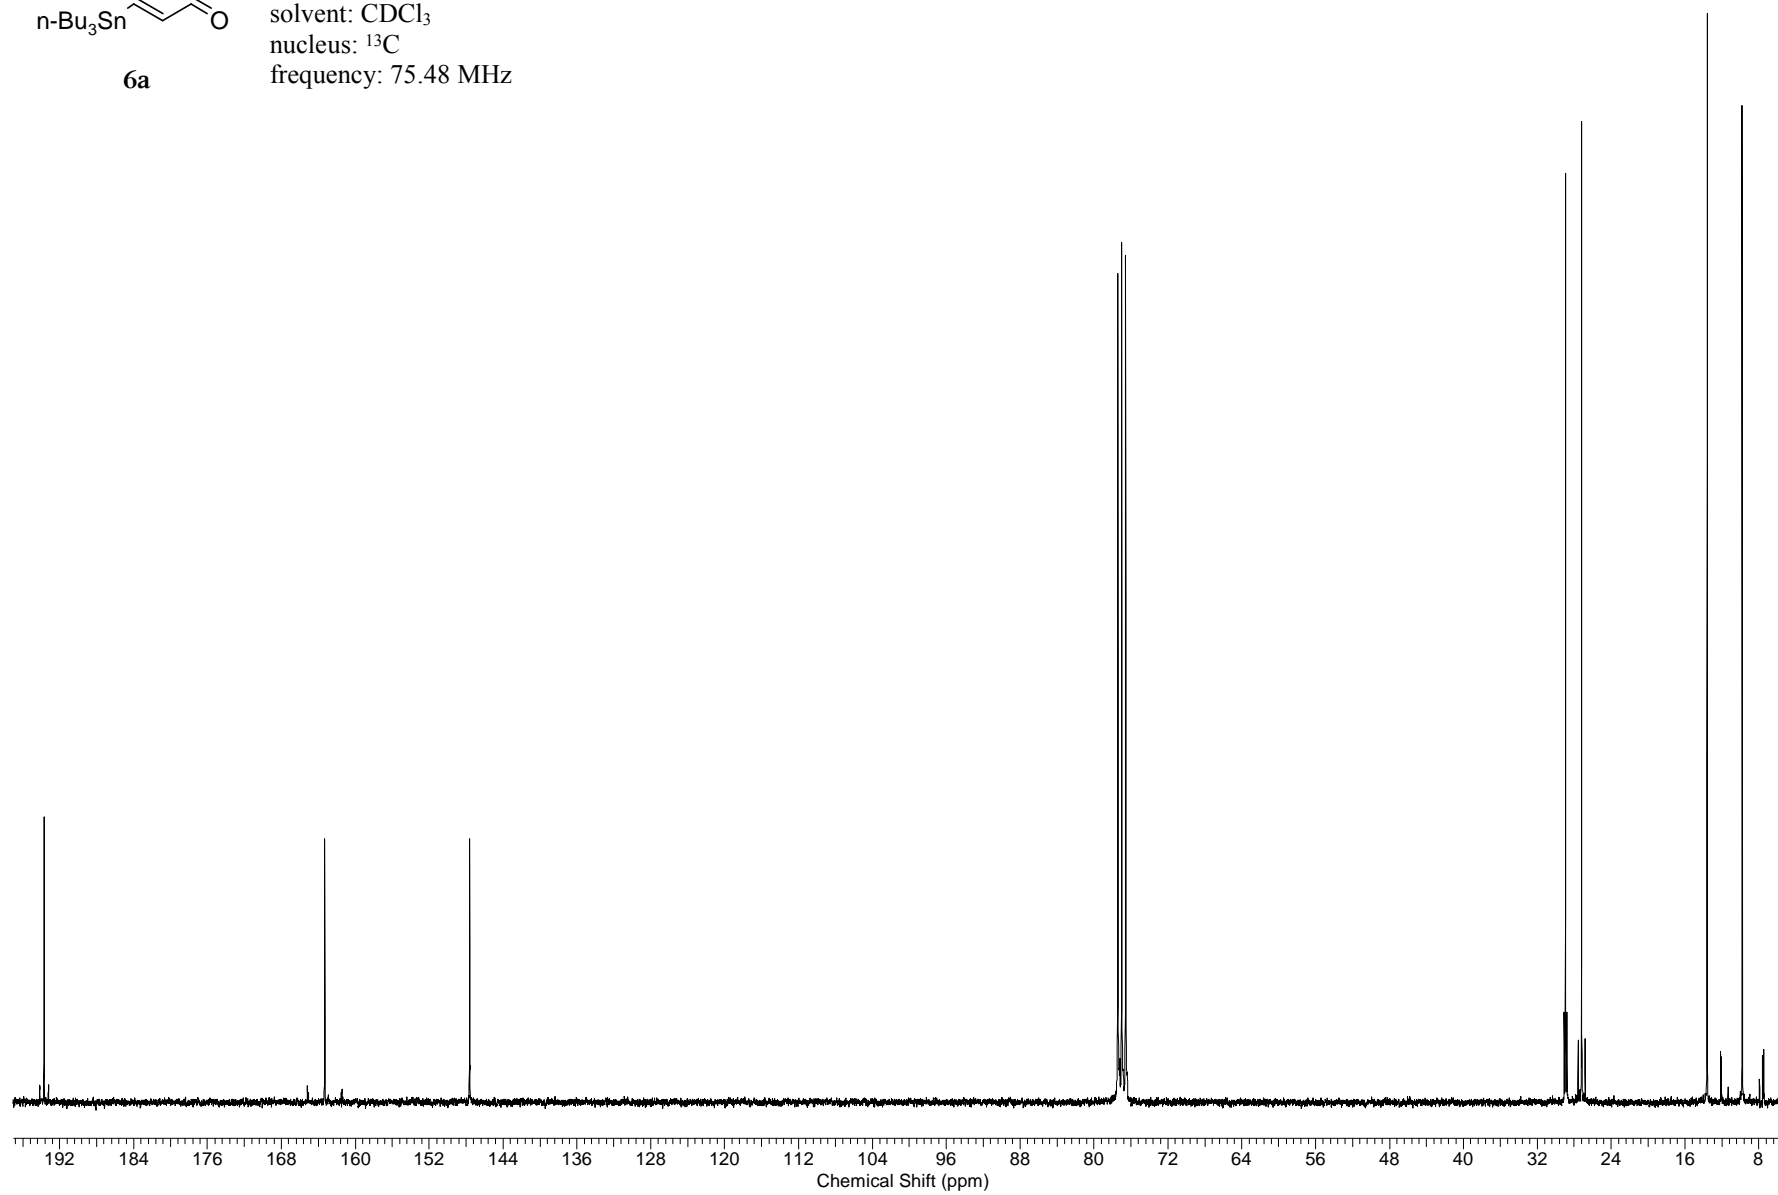

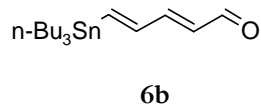

solvent: CDCl<sub>3</sub>  
nucleus: <sup>1</sup>H  
frequency: 300.132 MHz

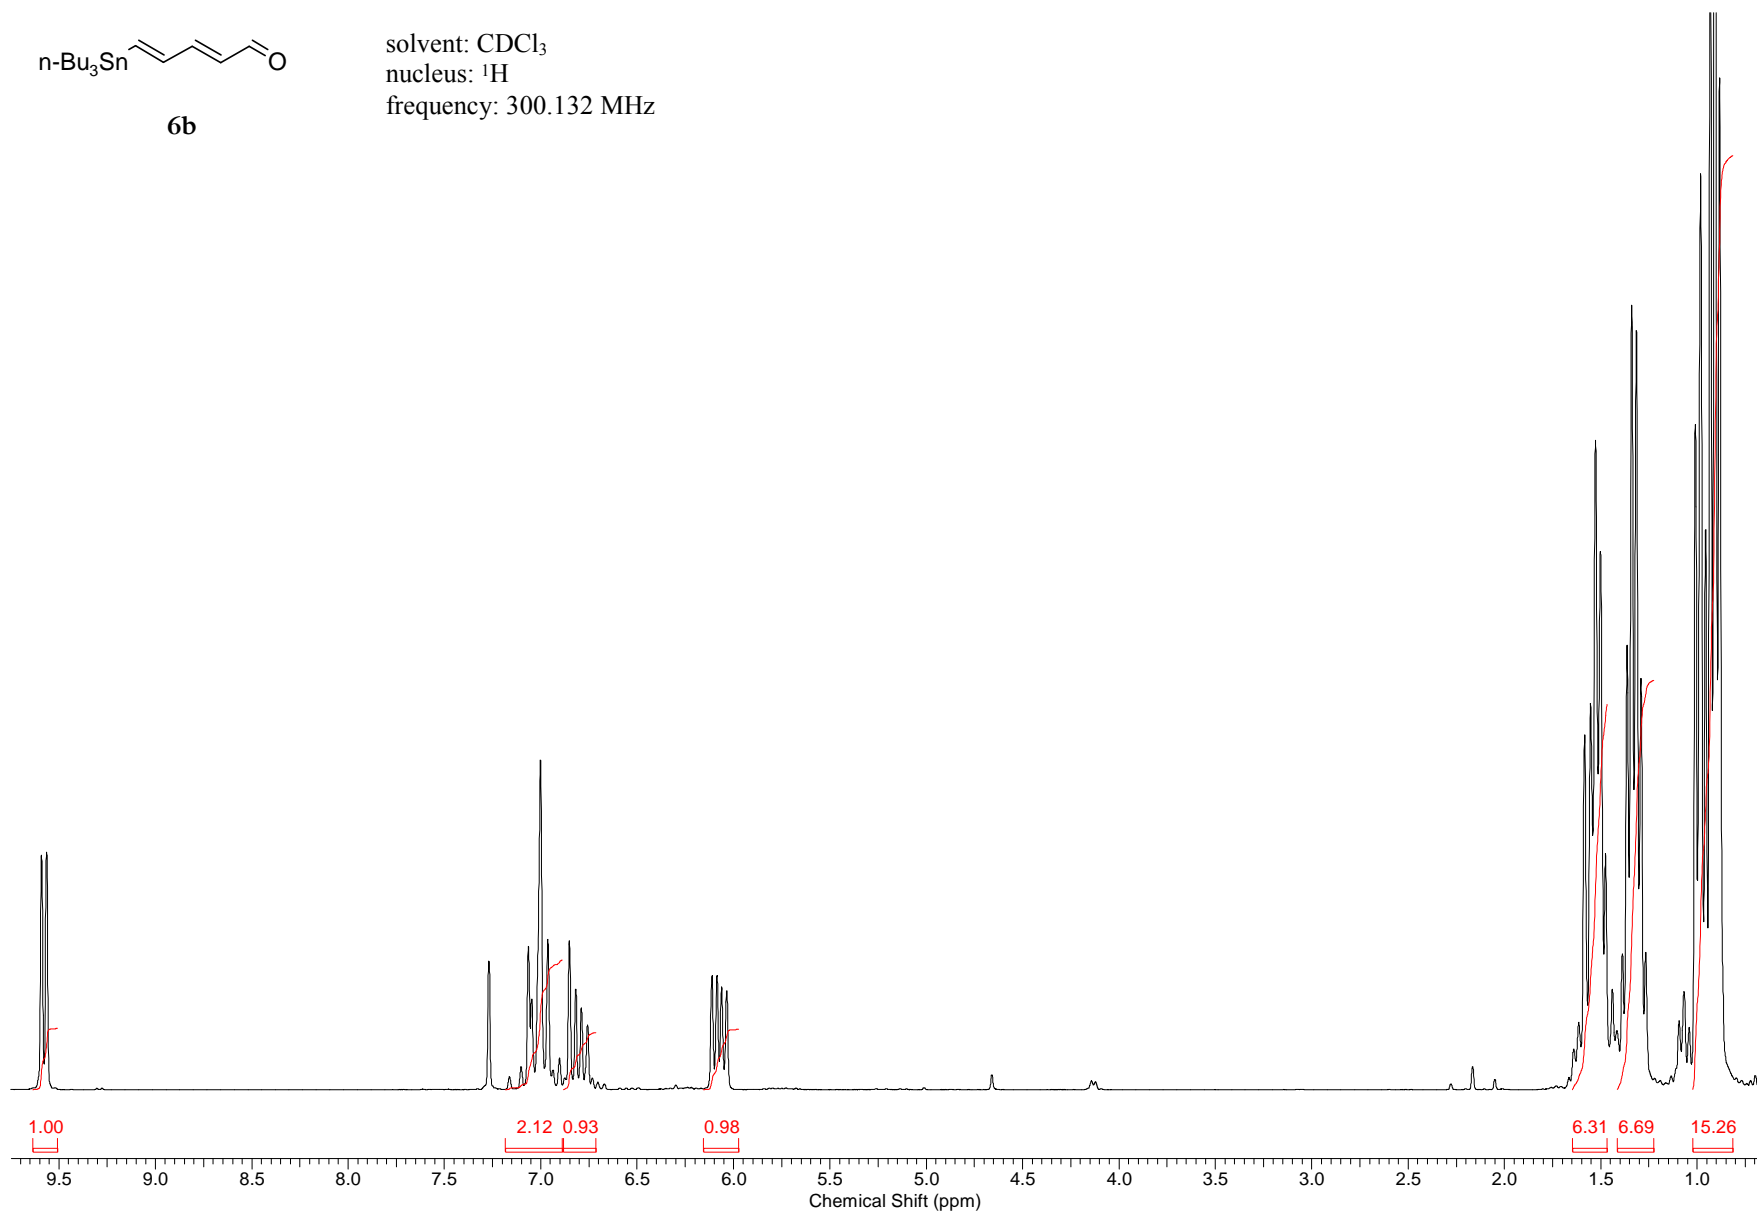

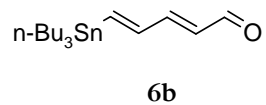

solvent: CDCl<sub>3</sub>  
nucleus: <sup>13</sup>C  
frequency: 75.48 MHz

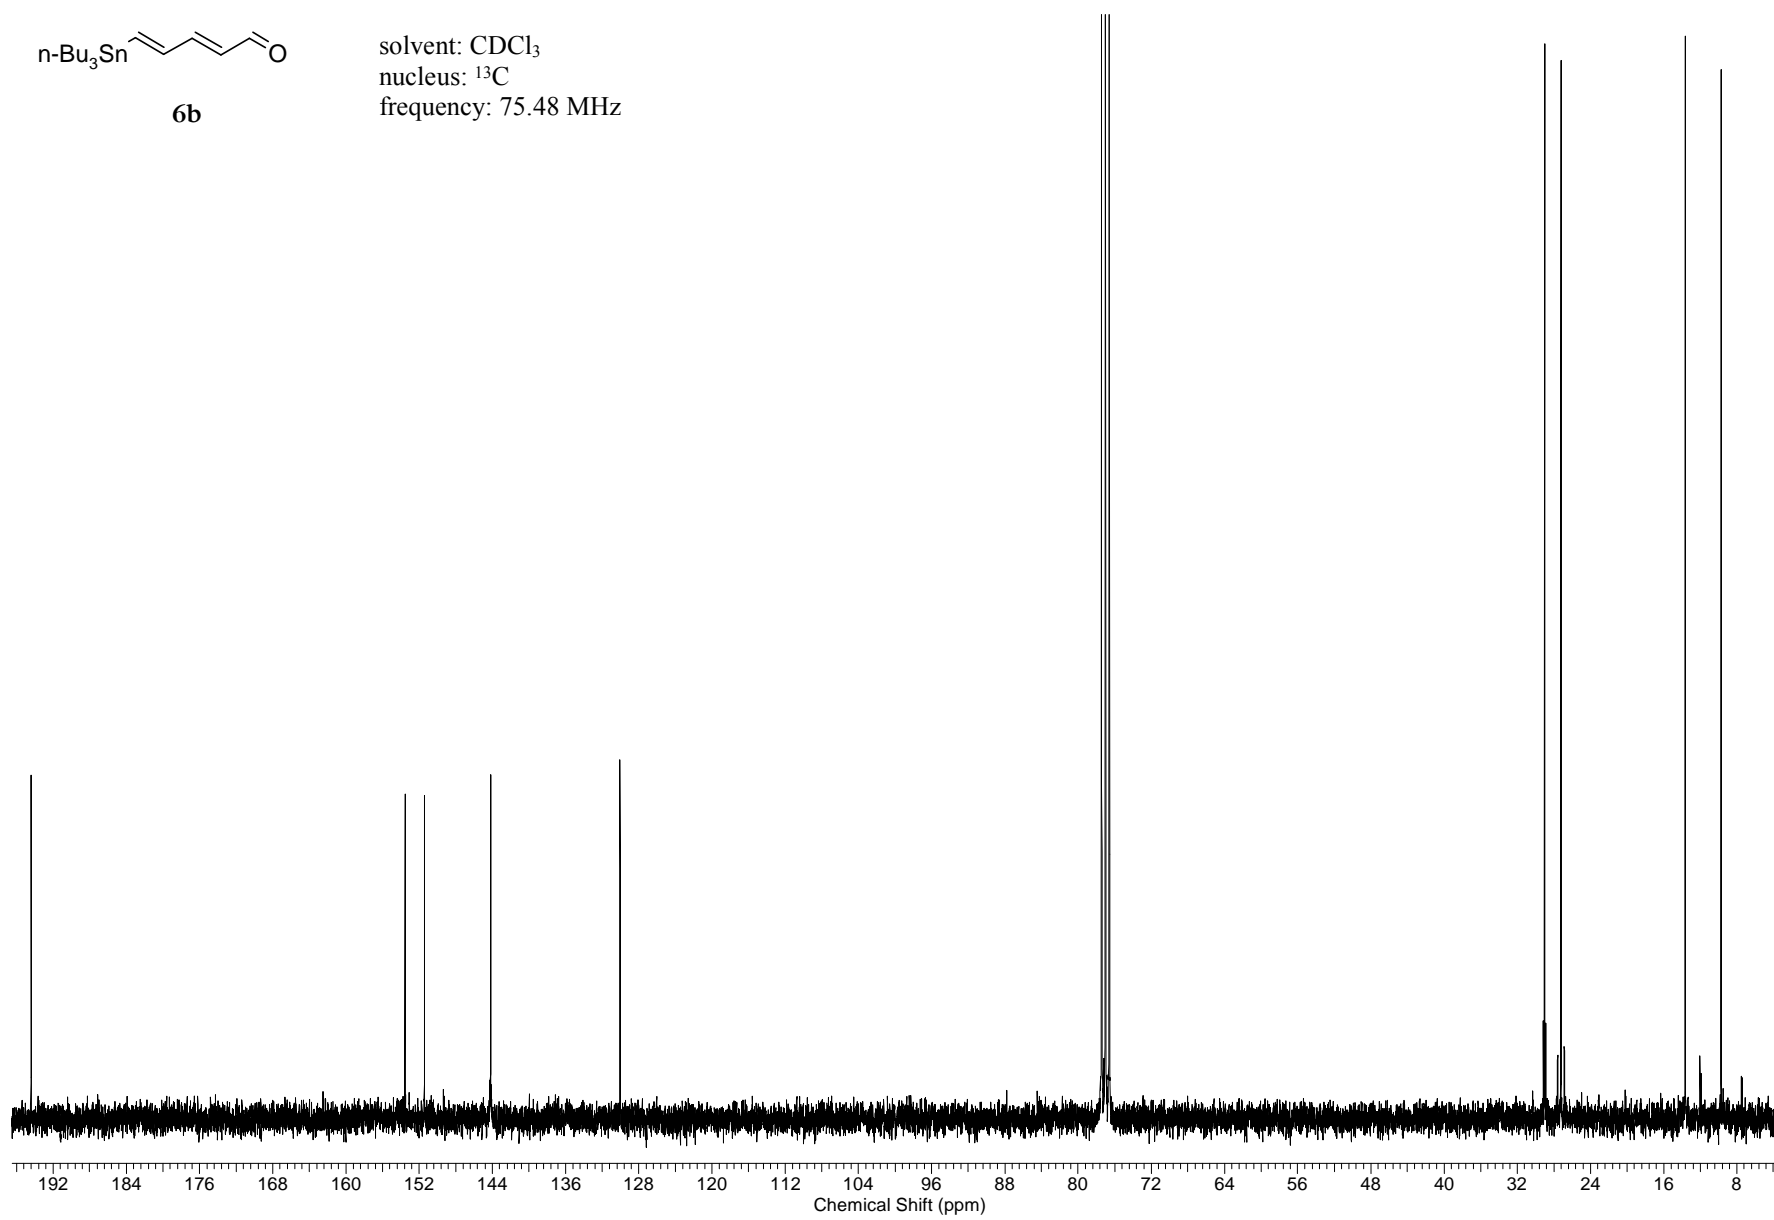

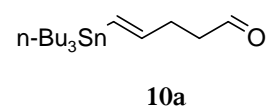

solvent: CDCl<sub>3</sub>  
nucleus: <sup>1</sup>H  
frequency: 300.132 MHz

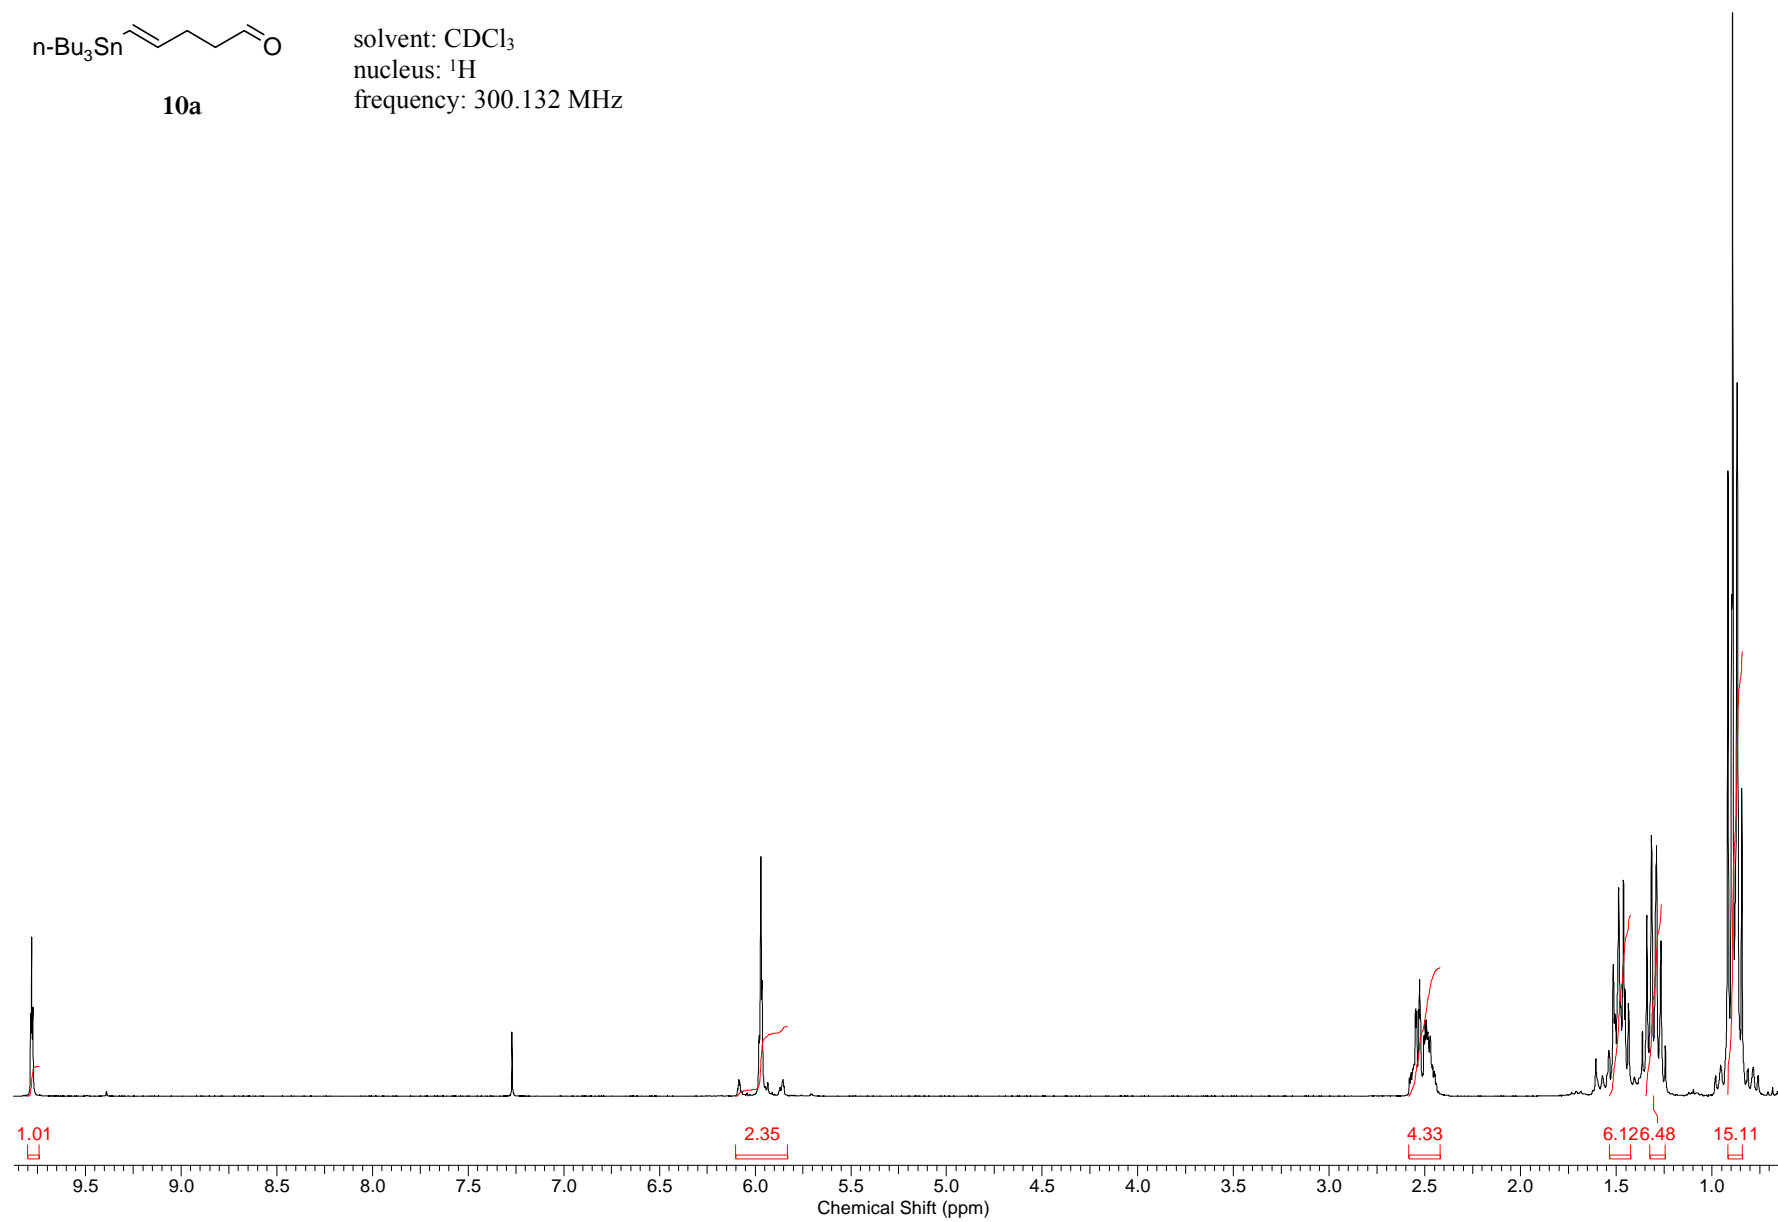

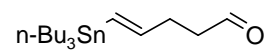

**10a**

solvent: CDCl<sub>3</sub>

nucleus: <sup>13</sup>C

frequency: 75.48 MHz

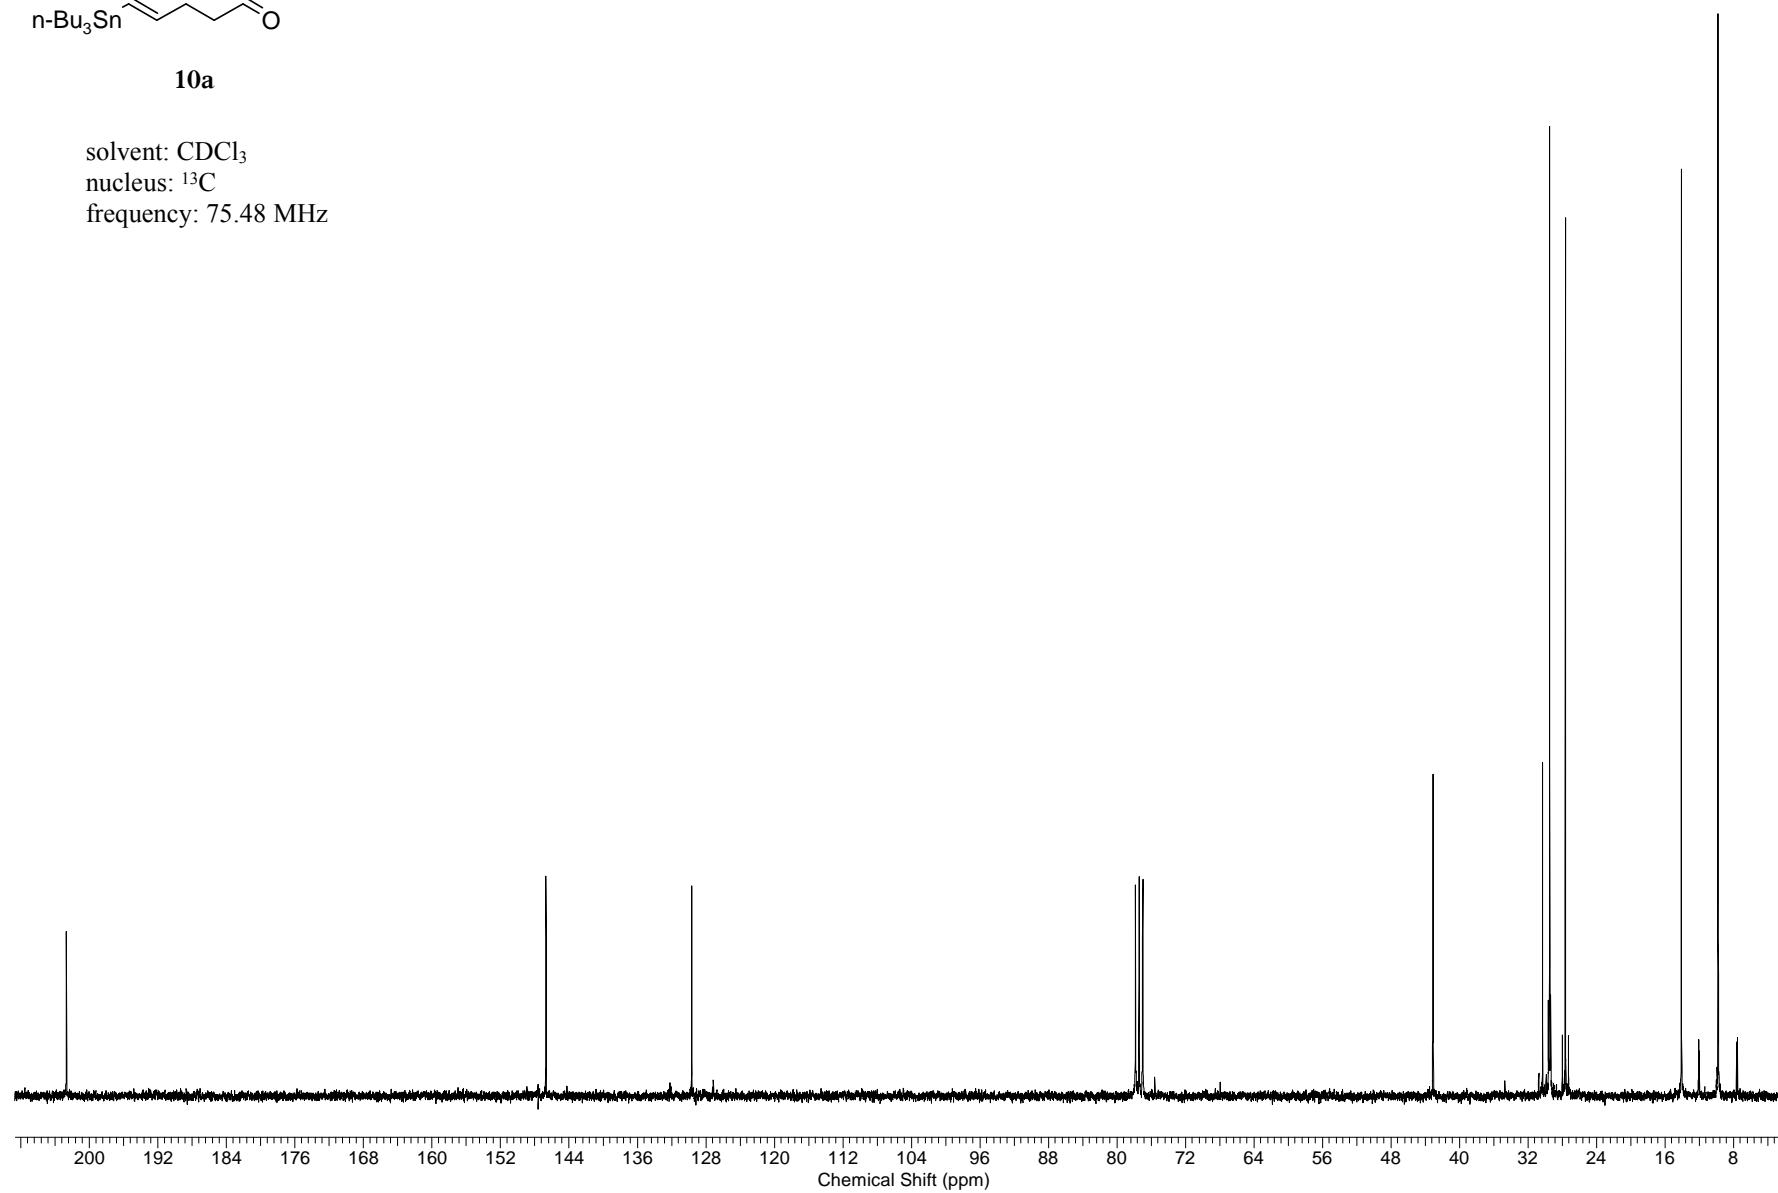

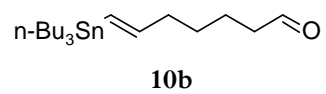

solvent: CDCl<sub>3</sub>  
nucleus: <sup>1</sup>H  
frequency: 300.132 MHz

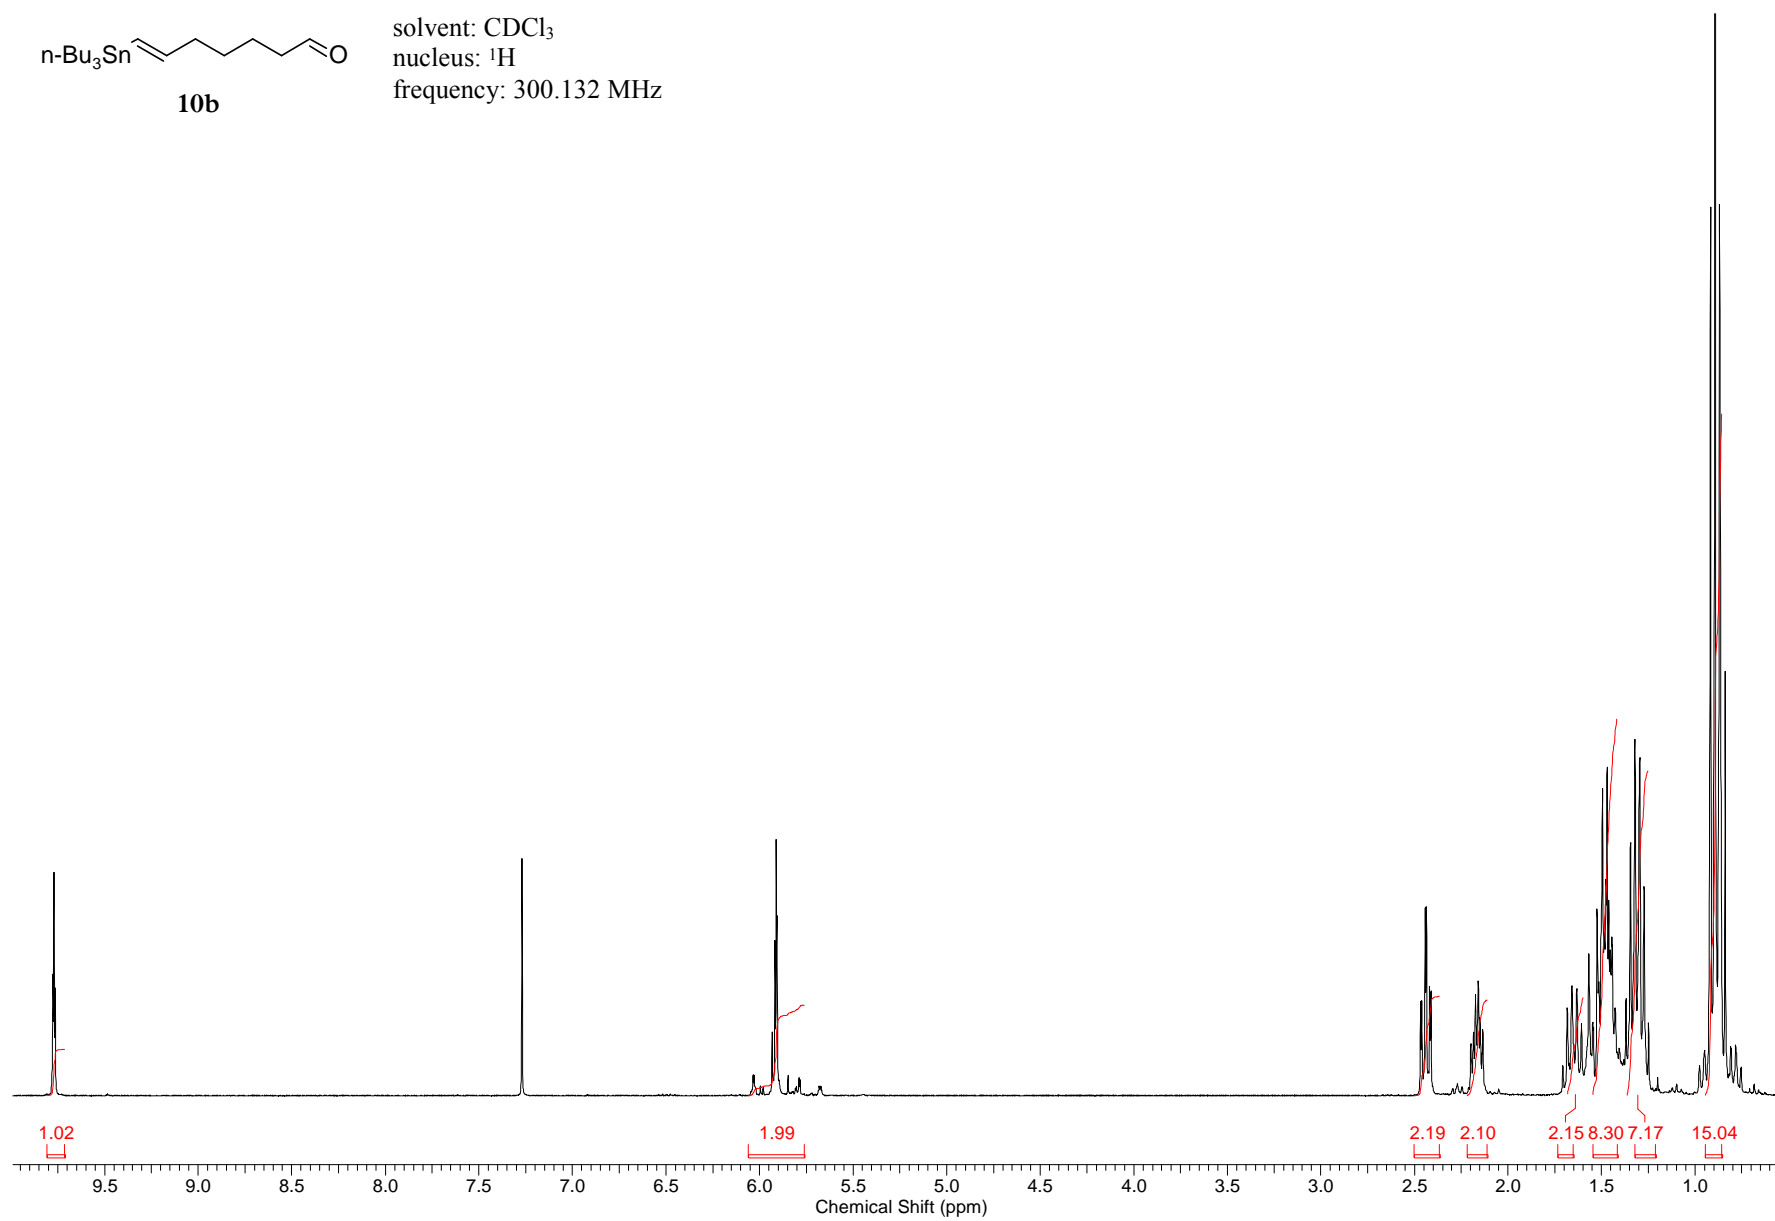

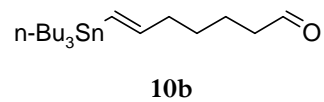

solvent: CDCl<sub>3</sub>  
nucleus: <sup>13</sup>C  
frequency: 75.48 MHz

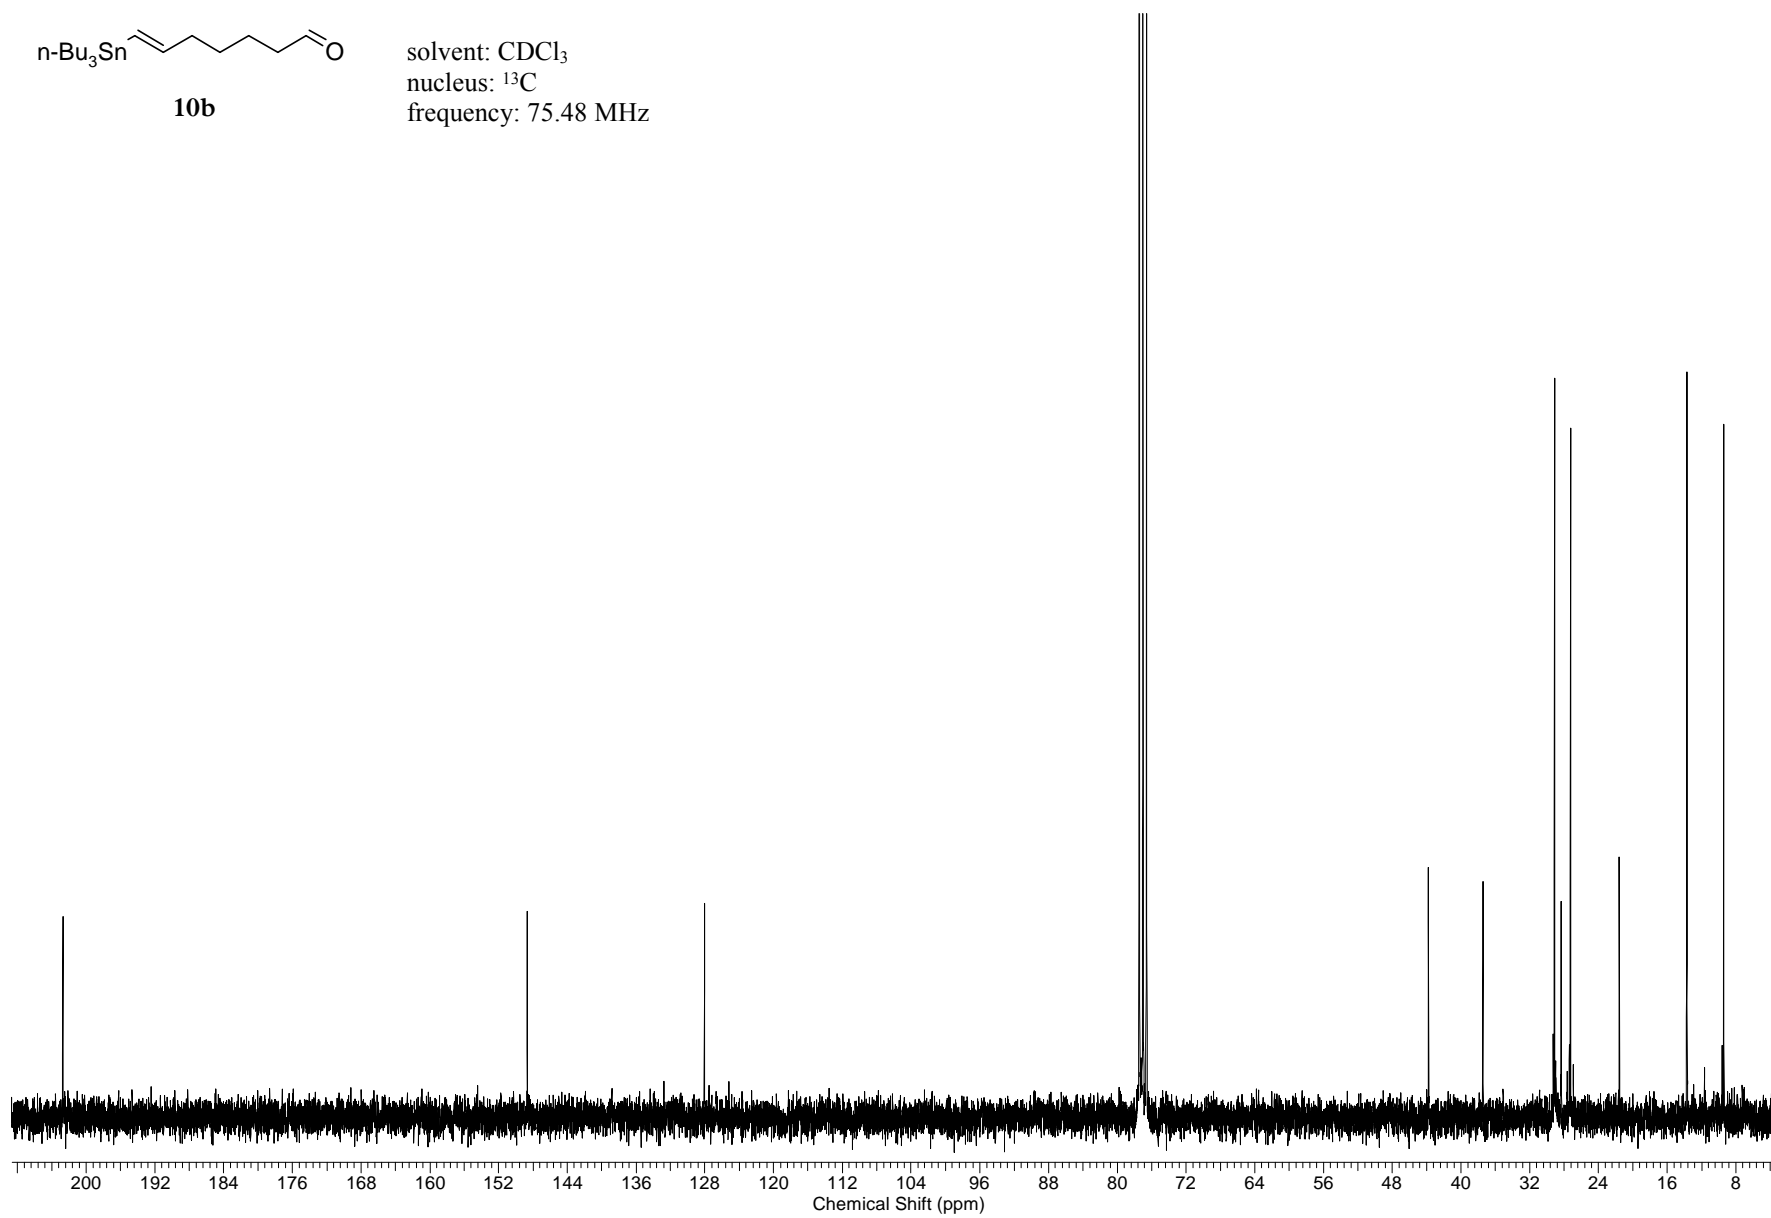



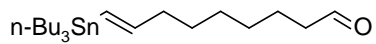

**10c**

solvent: CDCl<sub>3</sub>  
nucleus: <sup>1</sup>H  
frequency: 300.132 MHz

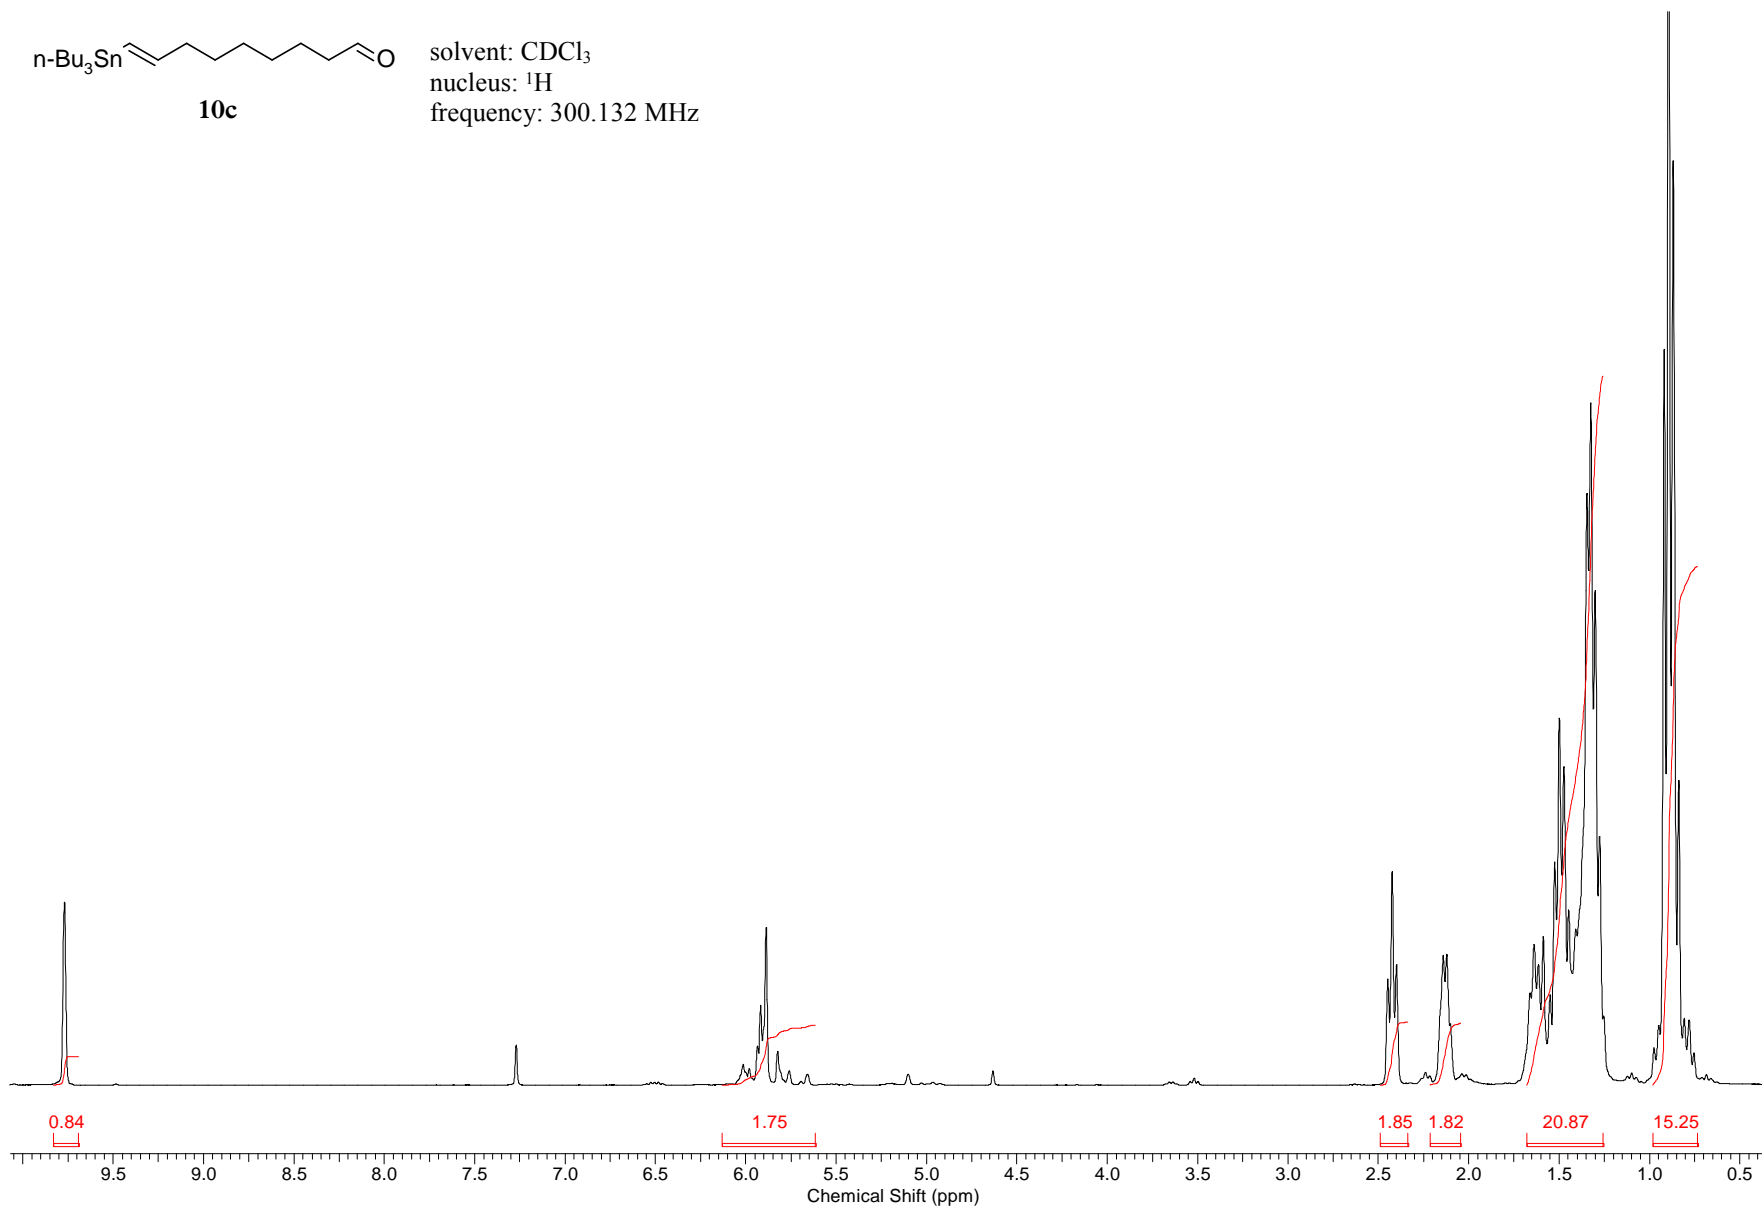

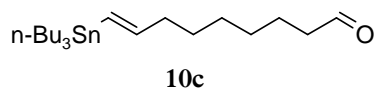

solvent: CDCl<sub>3</sub>  
nucleus: <sup>13</sup>C  
frequency: 75.48 MHz

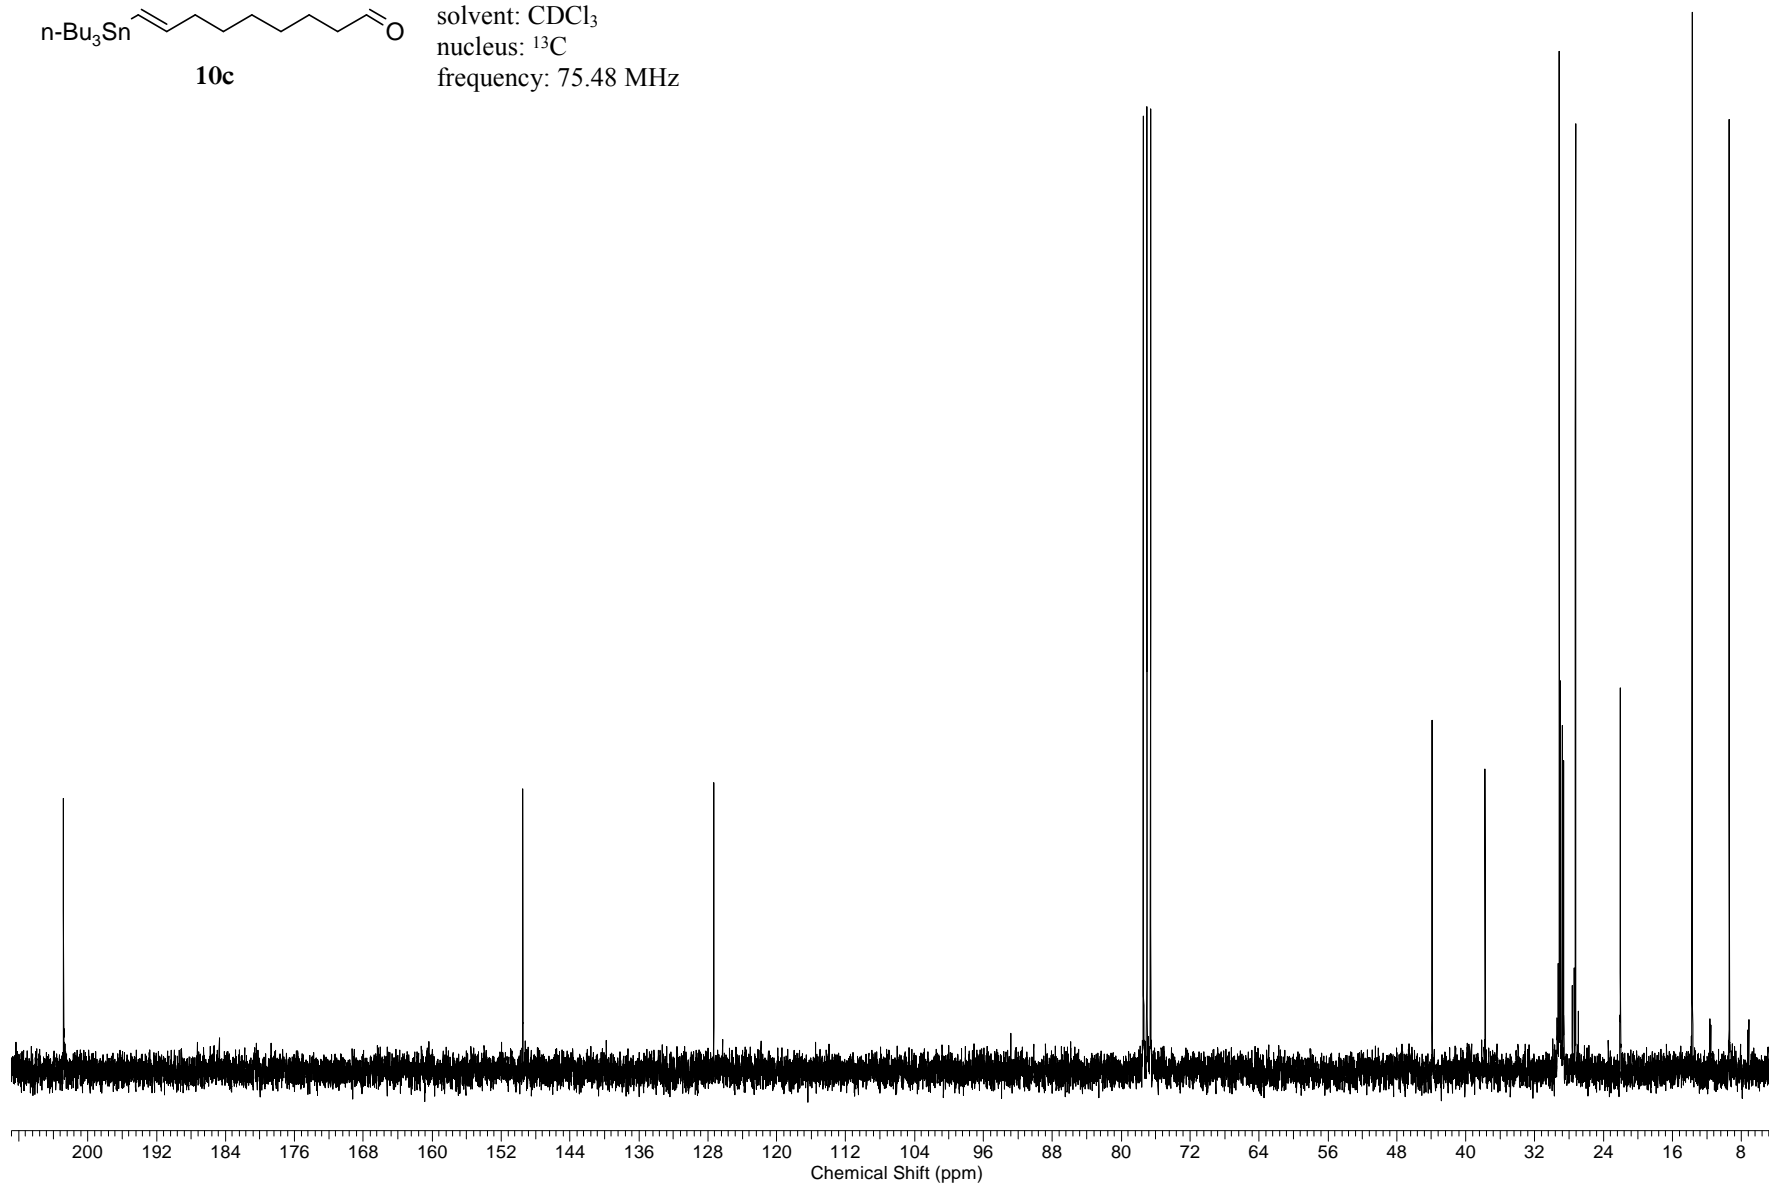

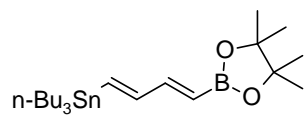

**2a**

solvent: CDCl<sub>3</sub>

nucleus: <sup>1</sup>H

frequency: 300.132 MHz

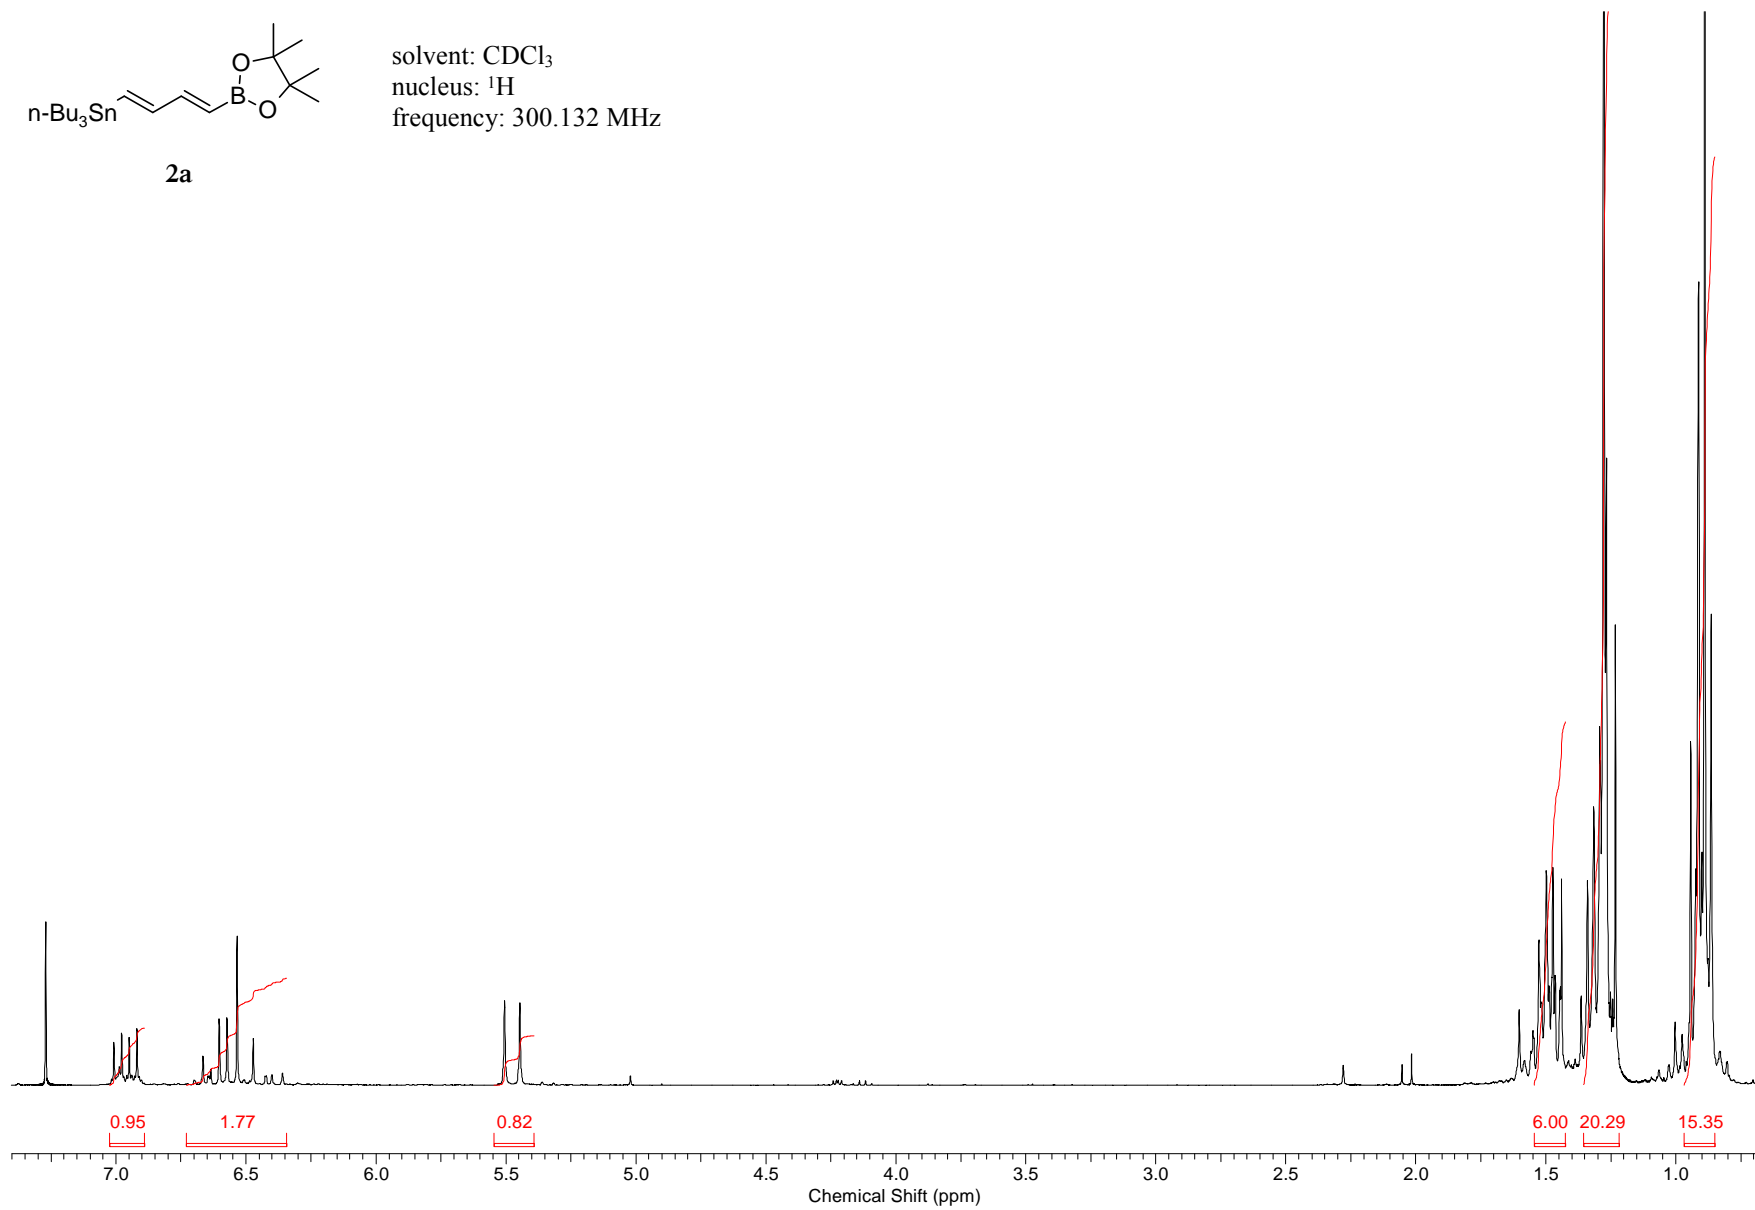

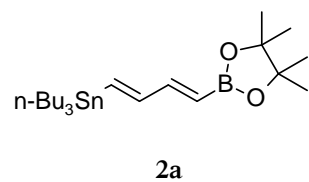

solvent: CDCl<sub>3</sub>  
nucleus: <sup>13</sup>C  
frequency: 75.48 MHz

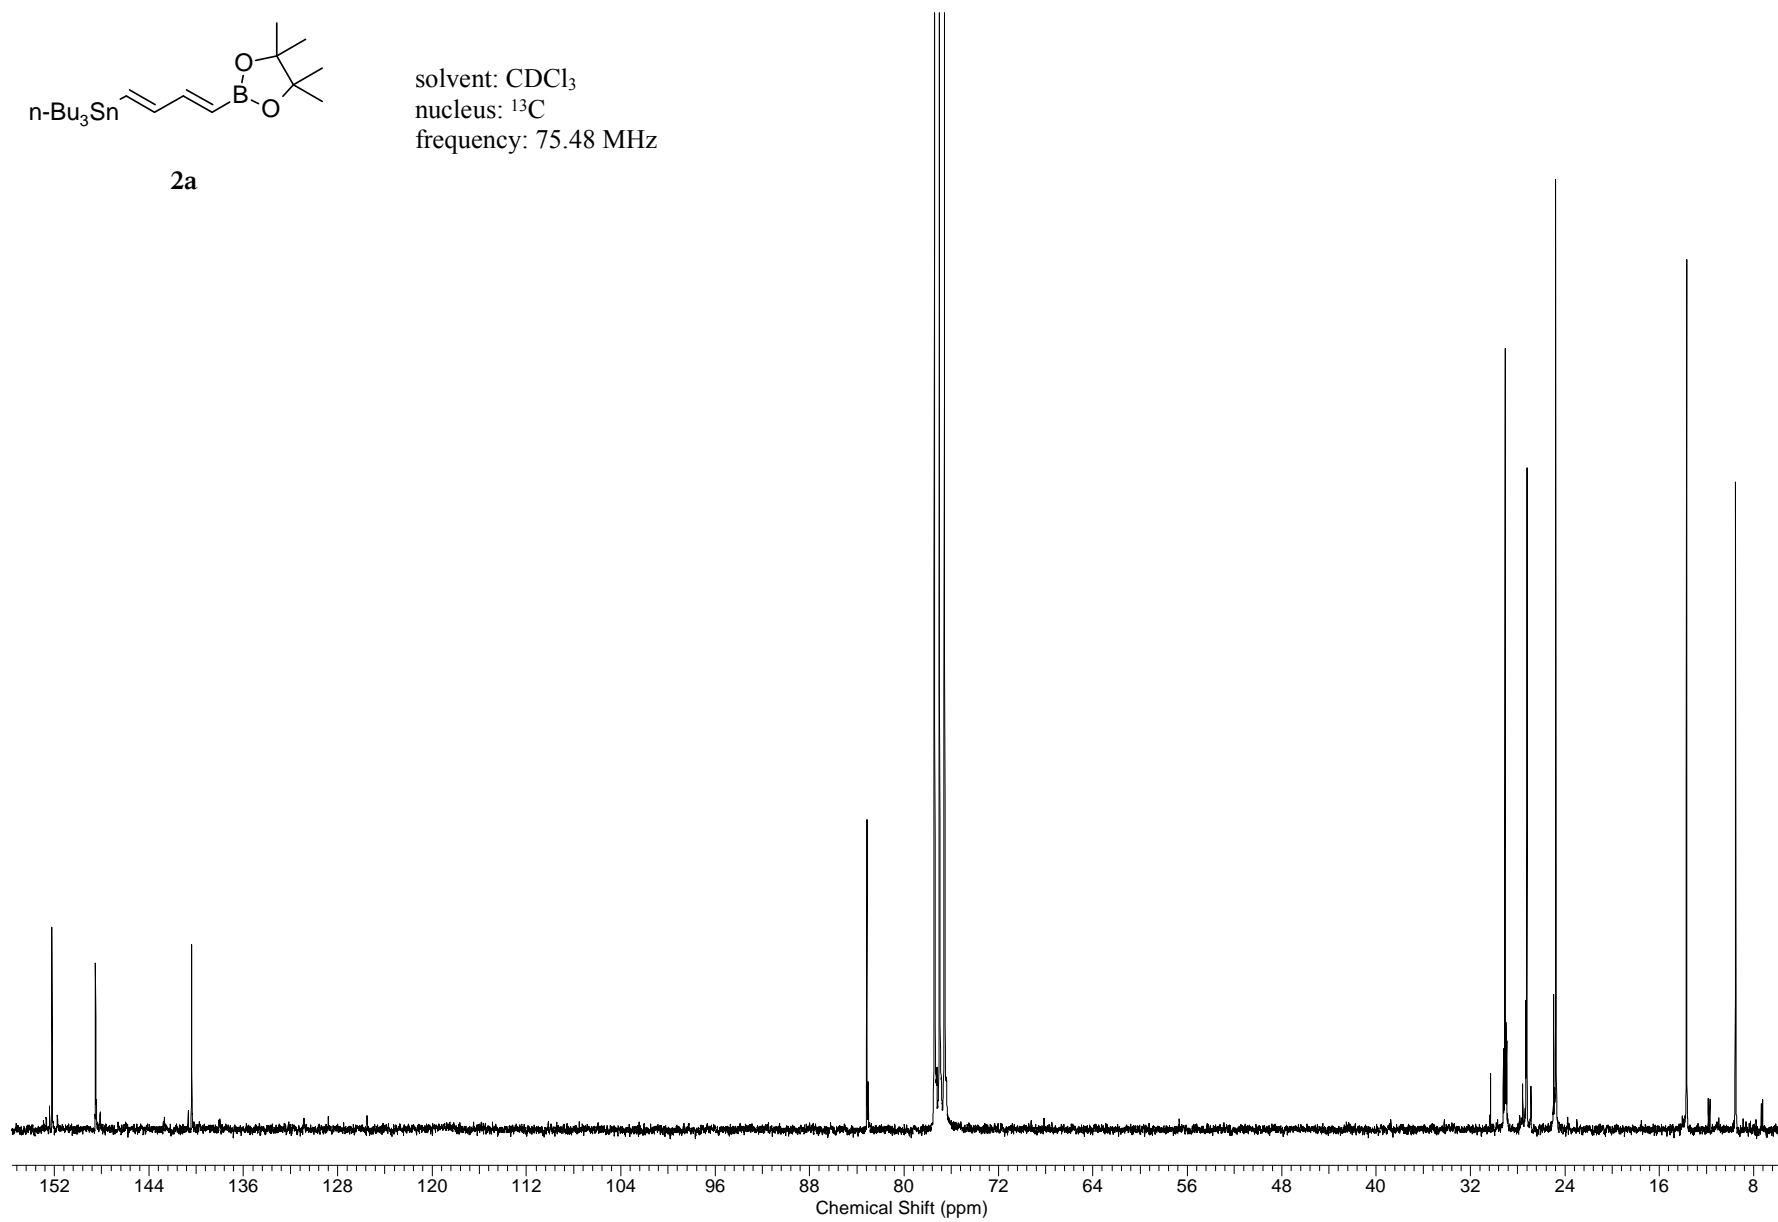

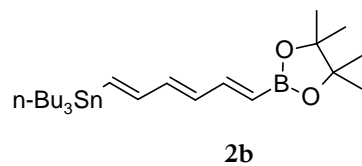

solvent: CDCl<sub>3</sub>  
nucleus: <sup>1</sup>H  
frequency: 300.132 MHz

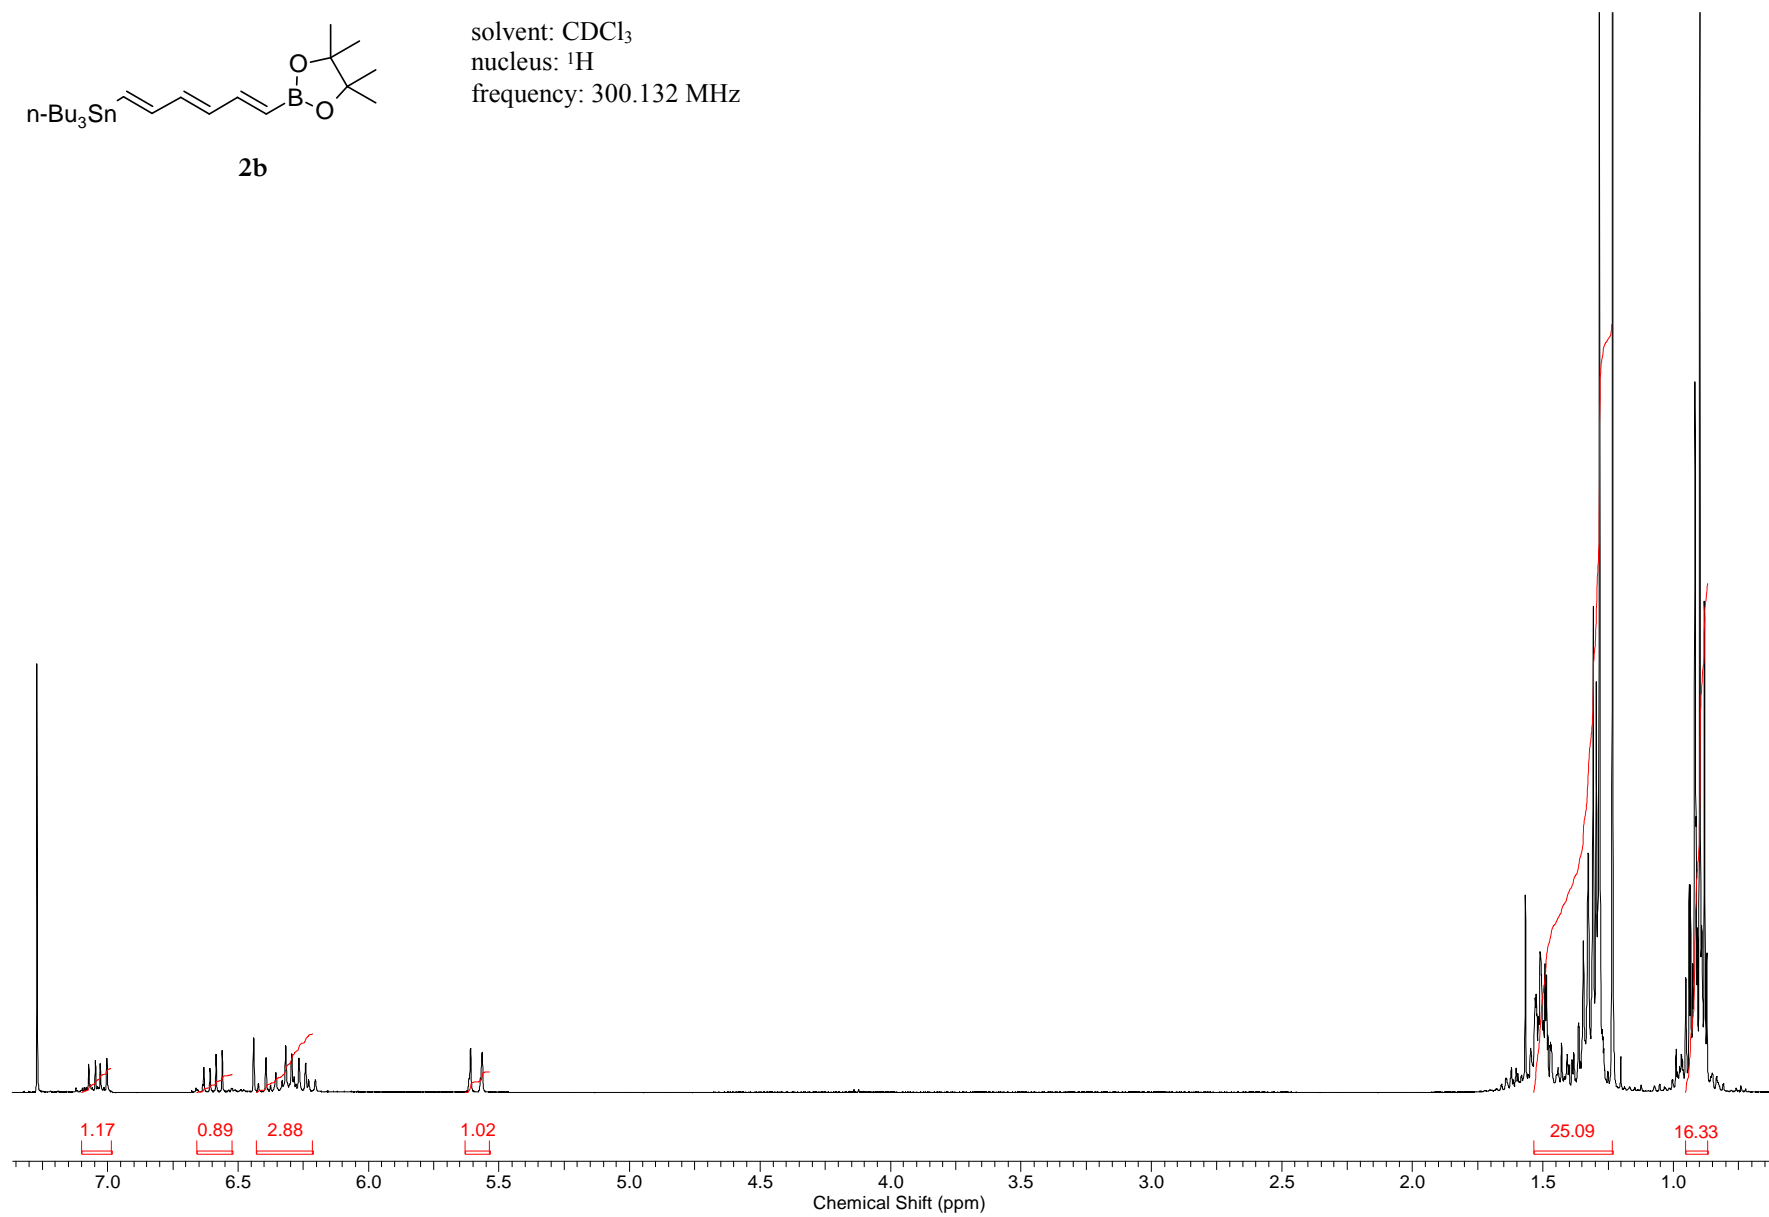

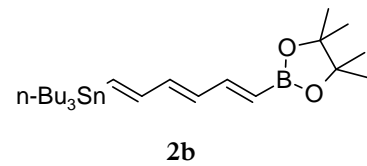

solvent: CDCl<sub>3</sub>  
nucleus: <sup>13</sup>C  
frequency: 100.61 MHz

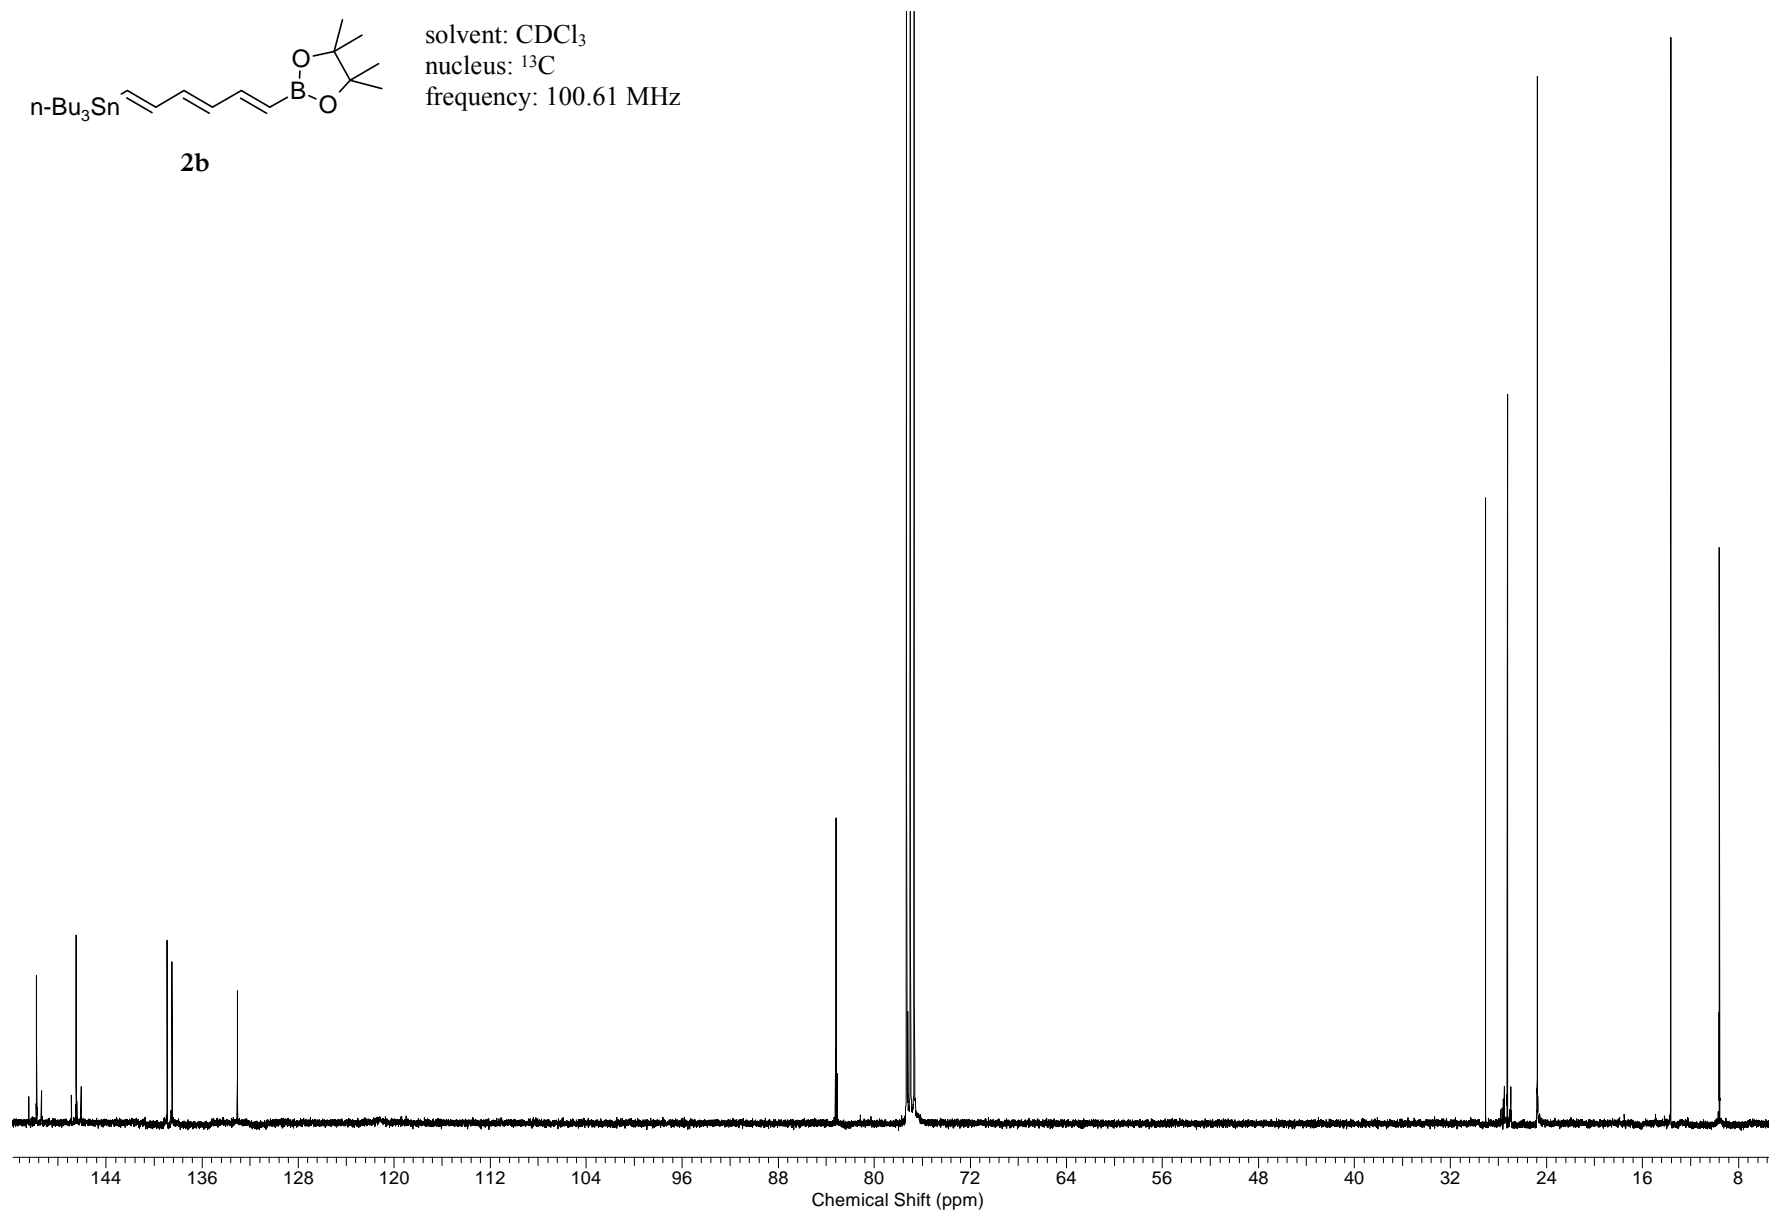

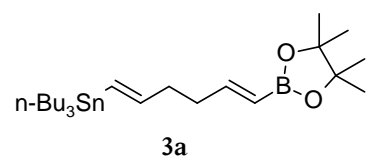

solvent: CDCl<sub>3</sub>  
nucleus: <sup>1</sup>H  
frequency: 300.132 MHz

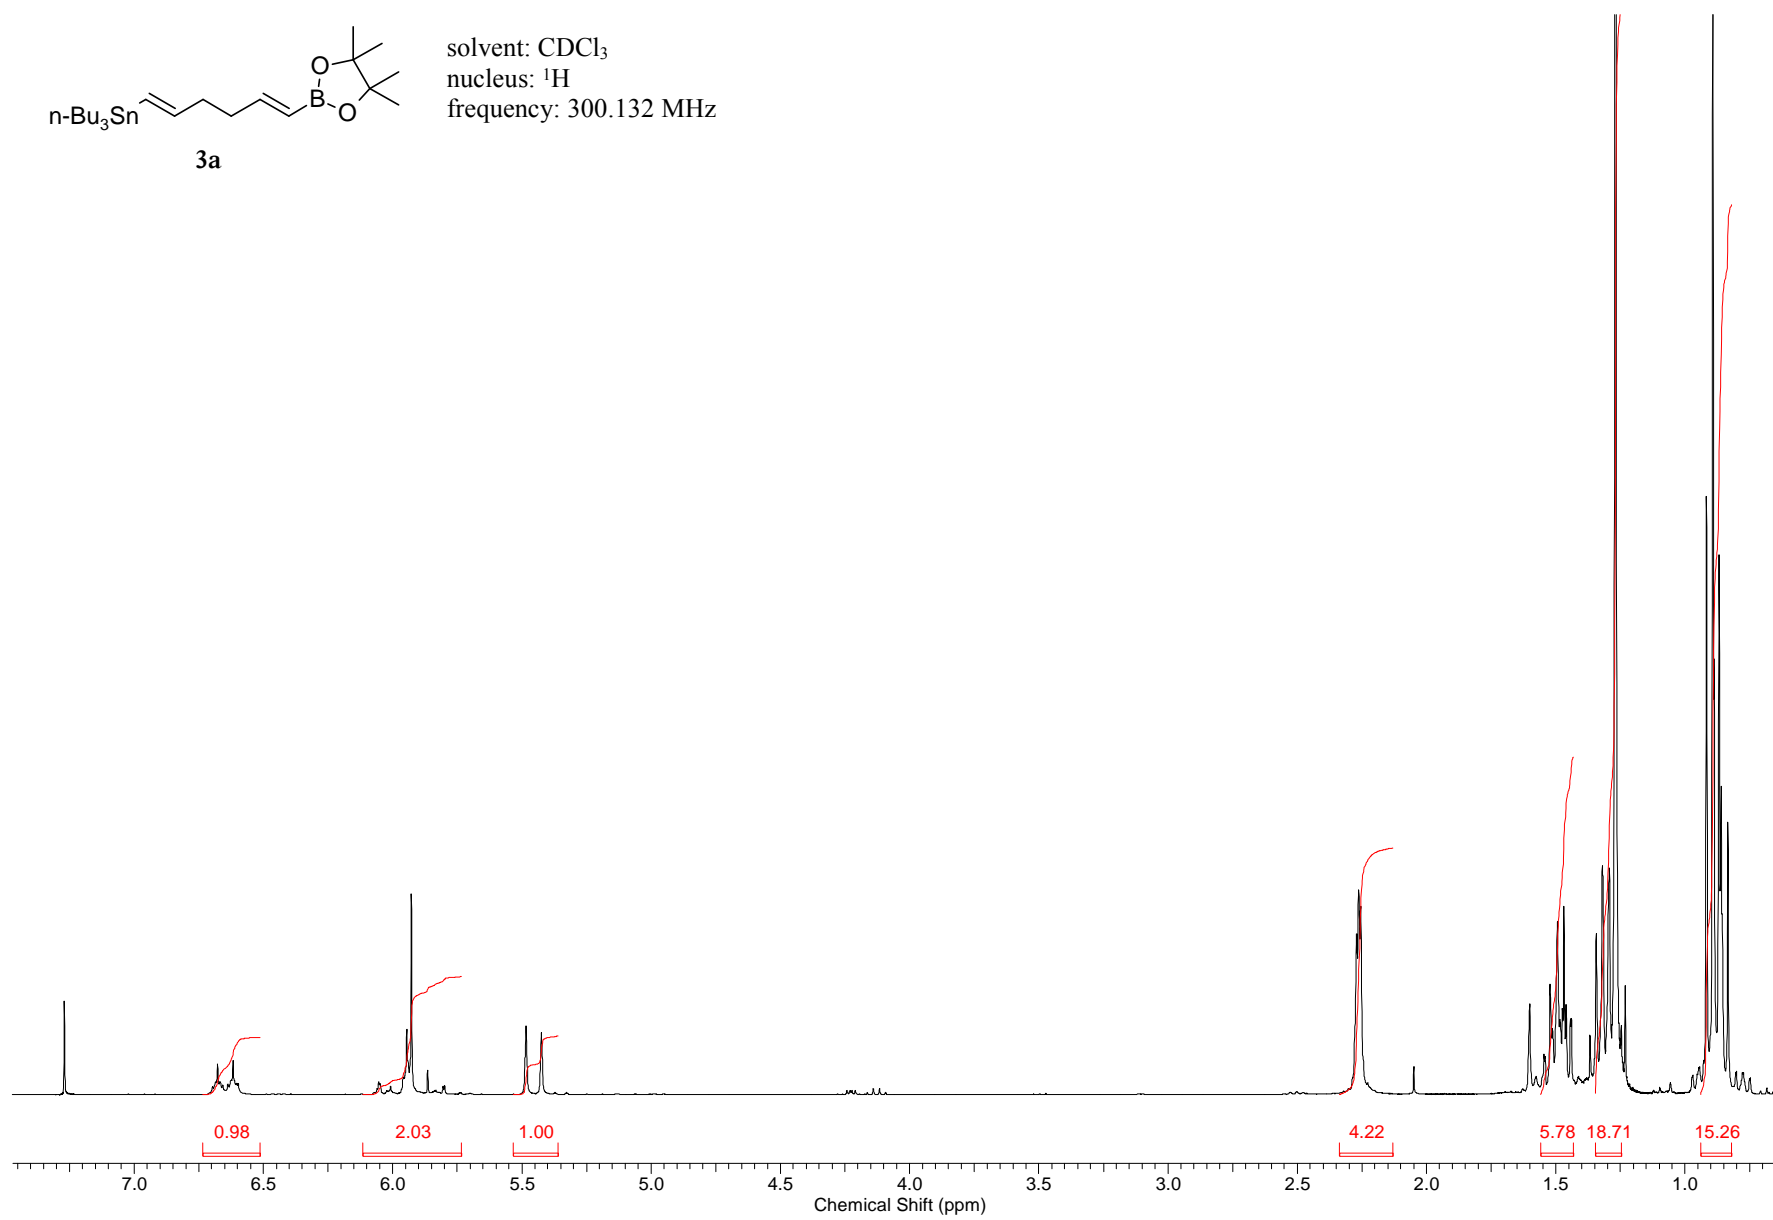

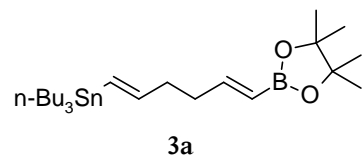

solvent: CDCl<sub>3</sub>  
nucleus: <sup>13</sup>C  
frequency: 75.48 MHz

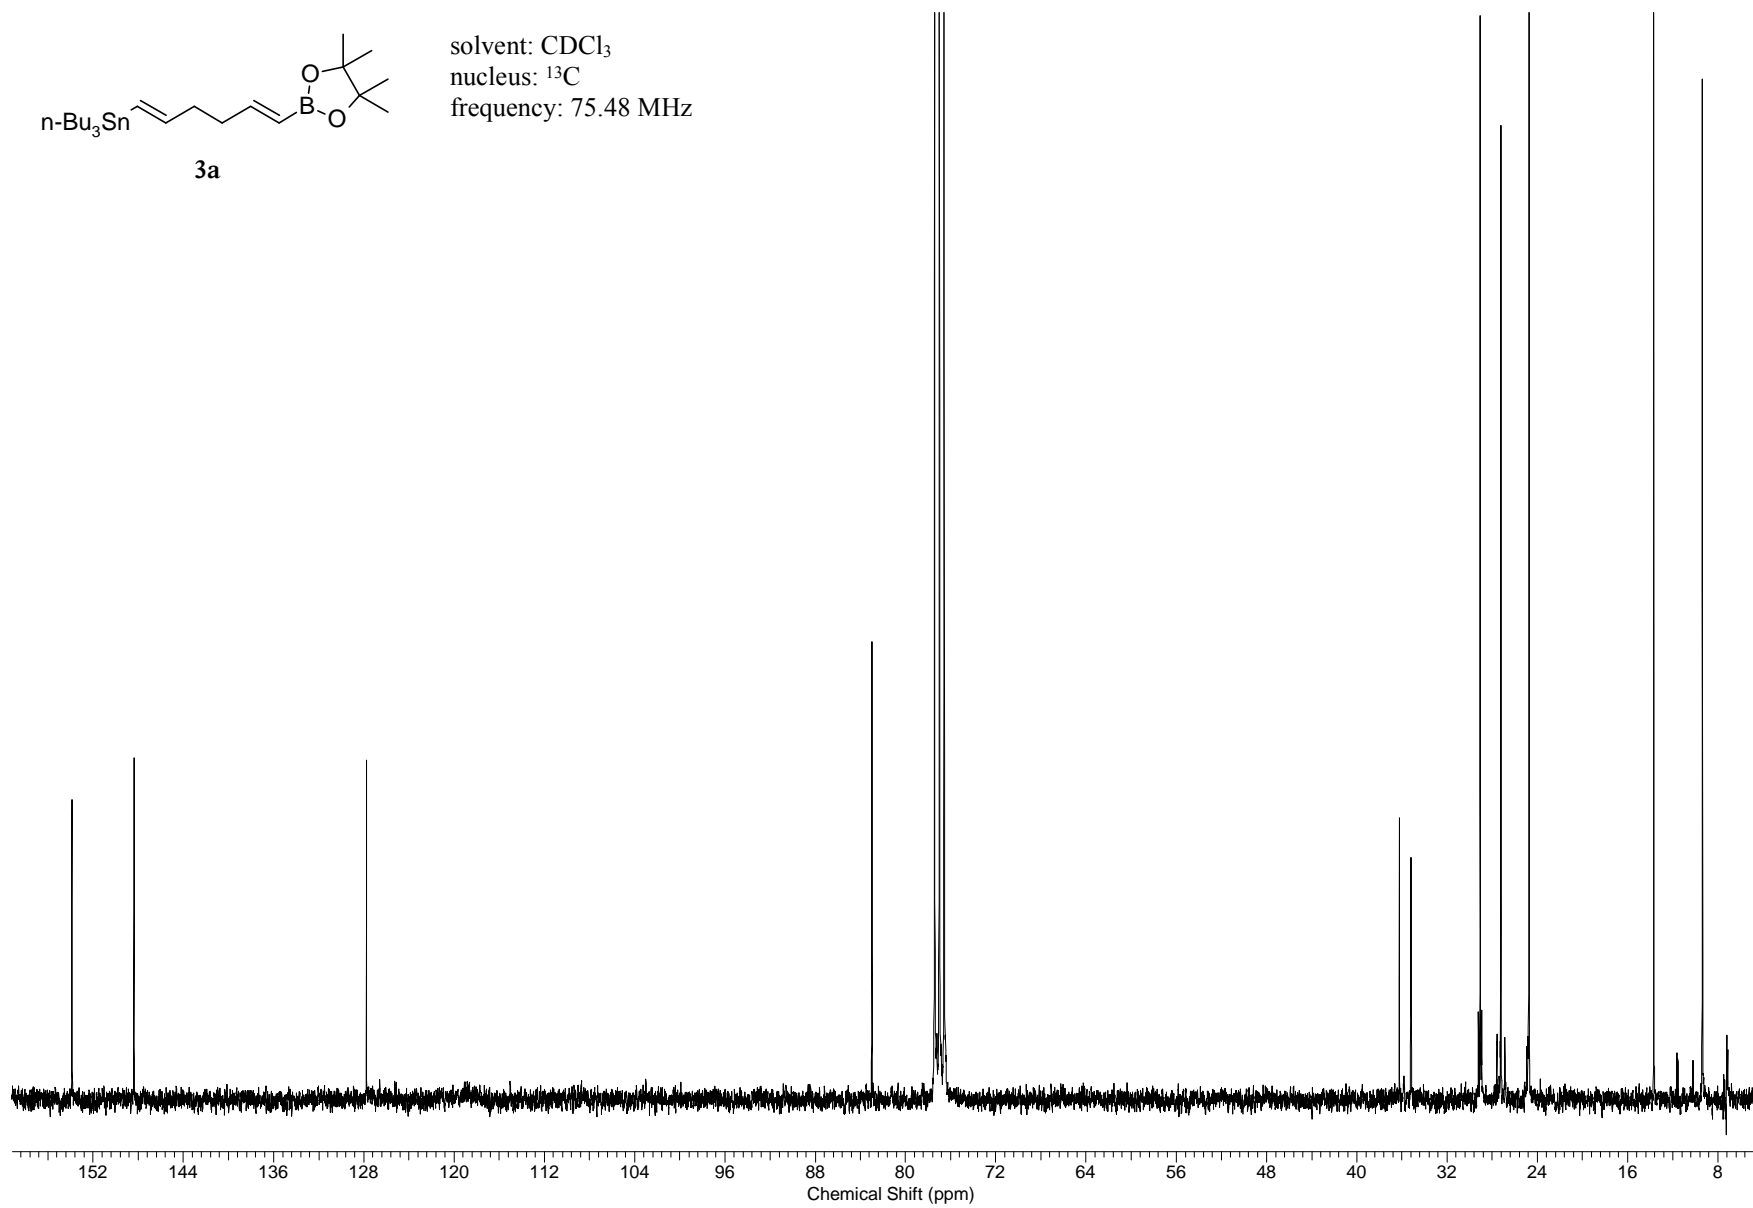



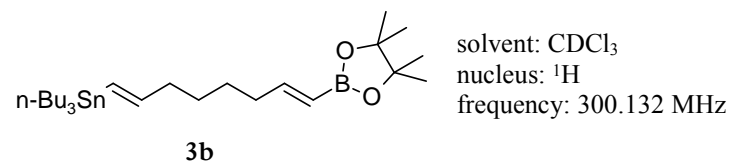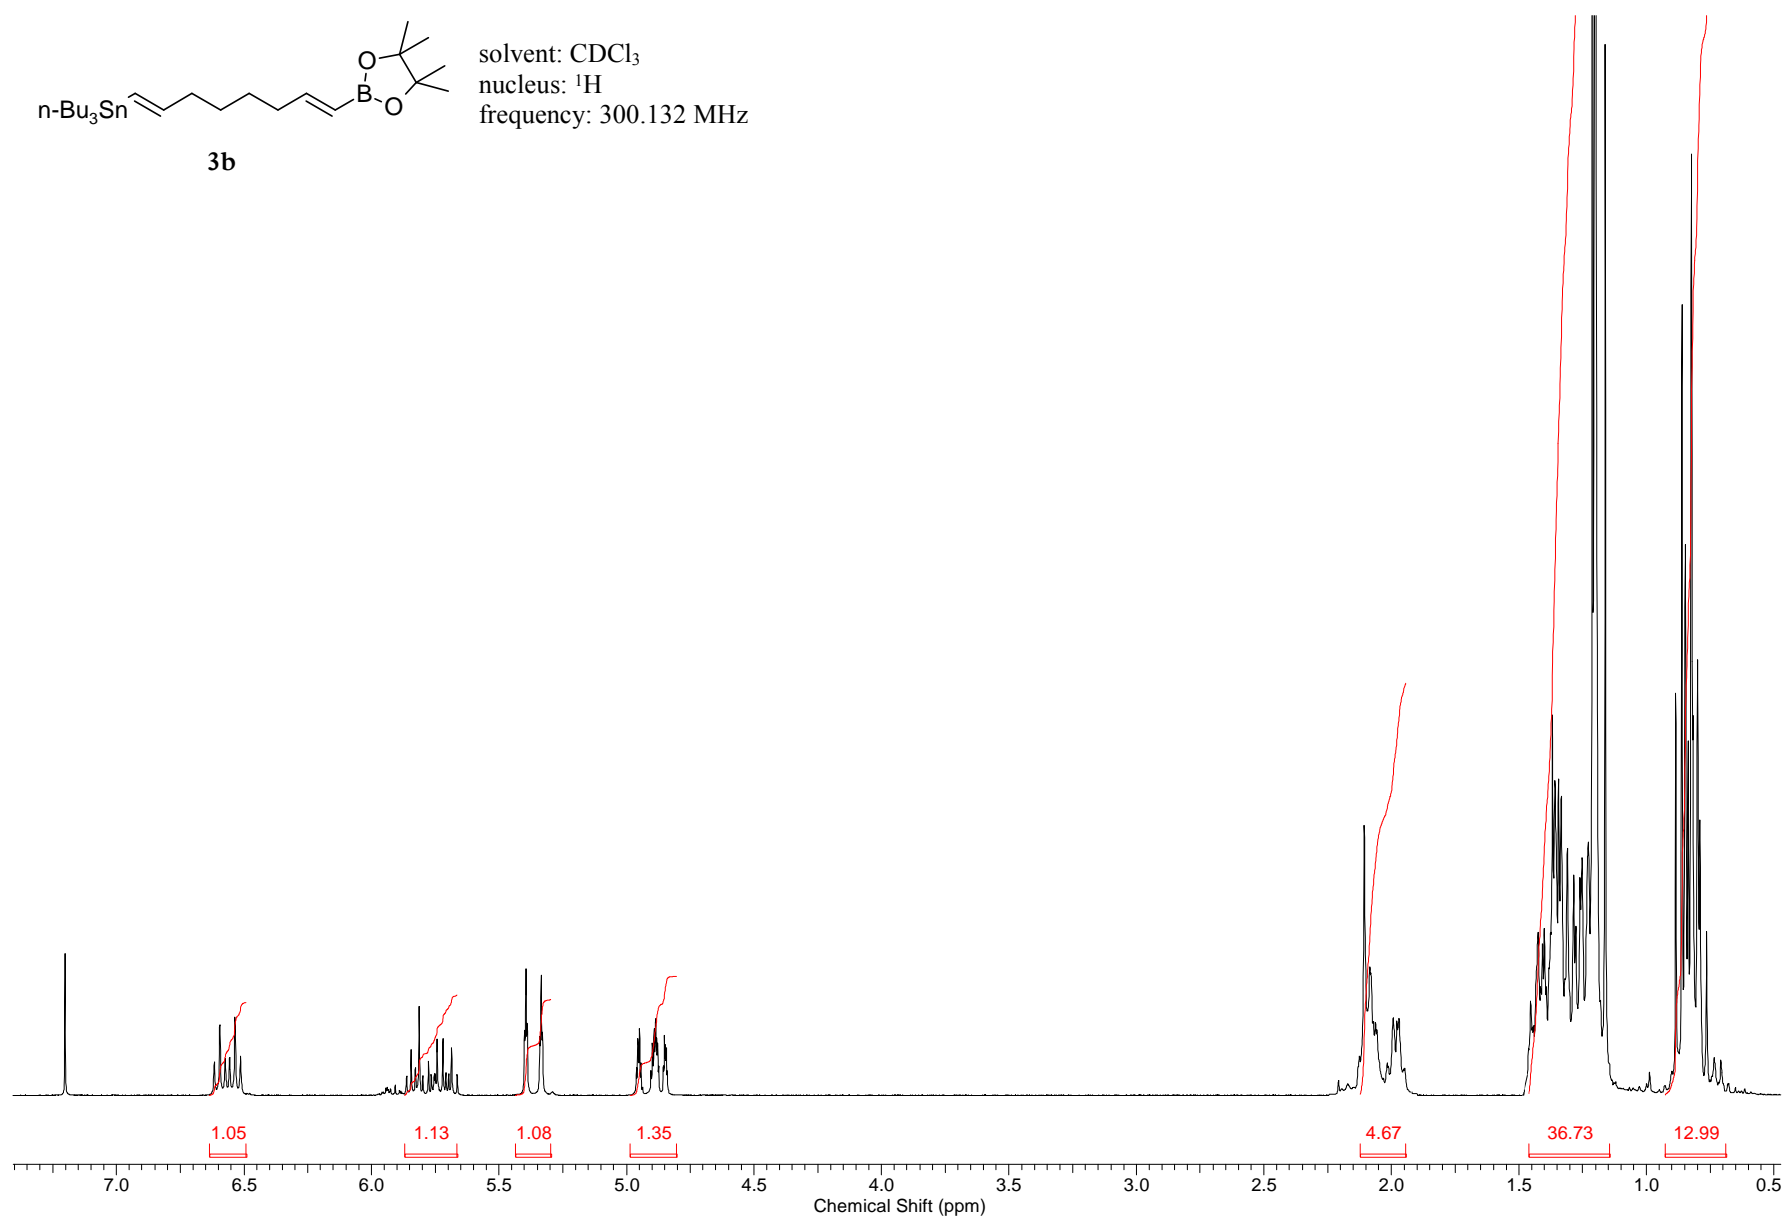

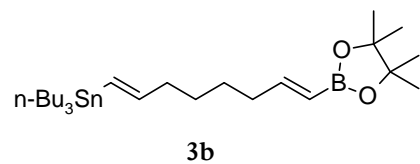

solvent: CDCl<sub>3</sub>  
nucleus: <sup>13</sup>C  
frequency: 75.48 MHz

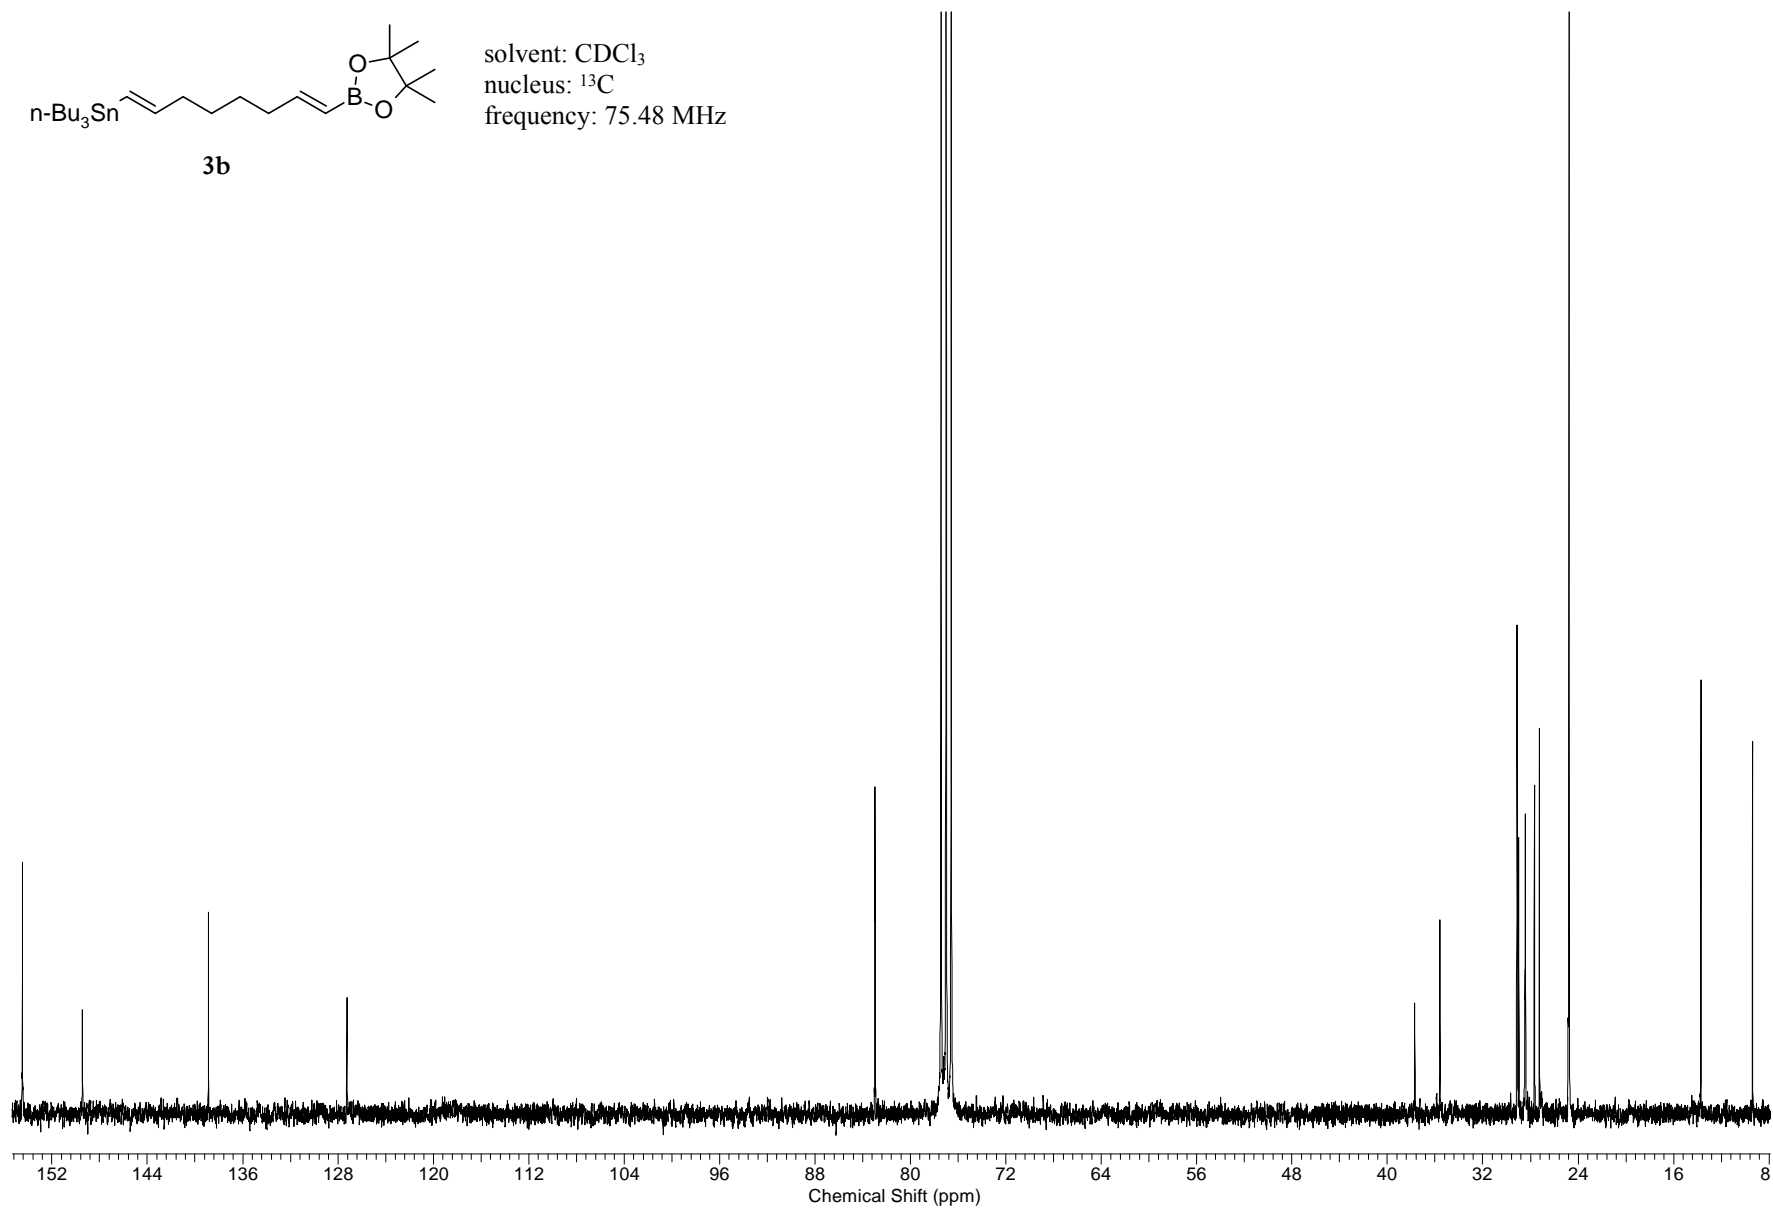

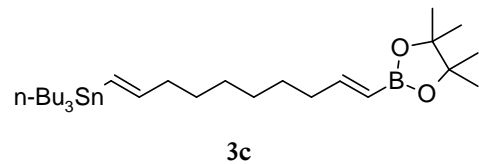

solvent: CDCl<sub>3</sub>  
nucleus: <sup>1</sup>H  
frequency: 300.132 MHz

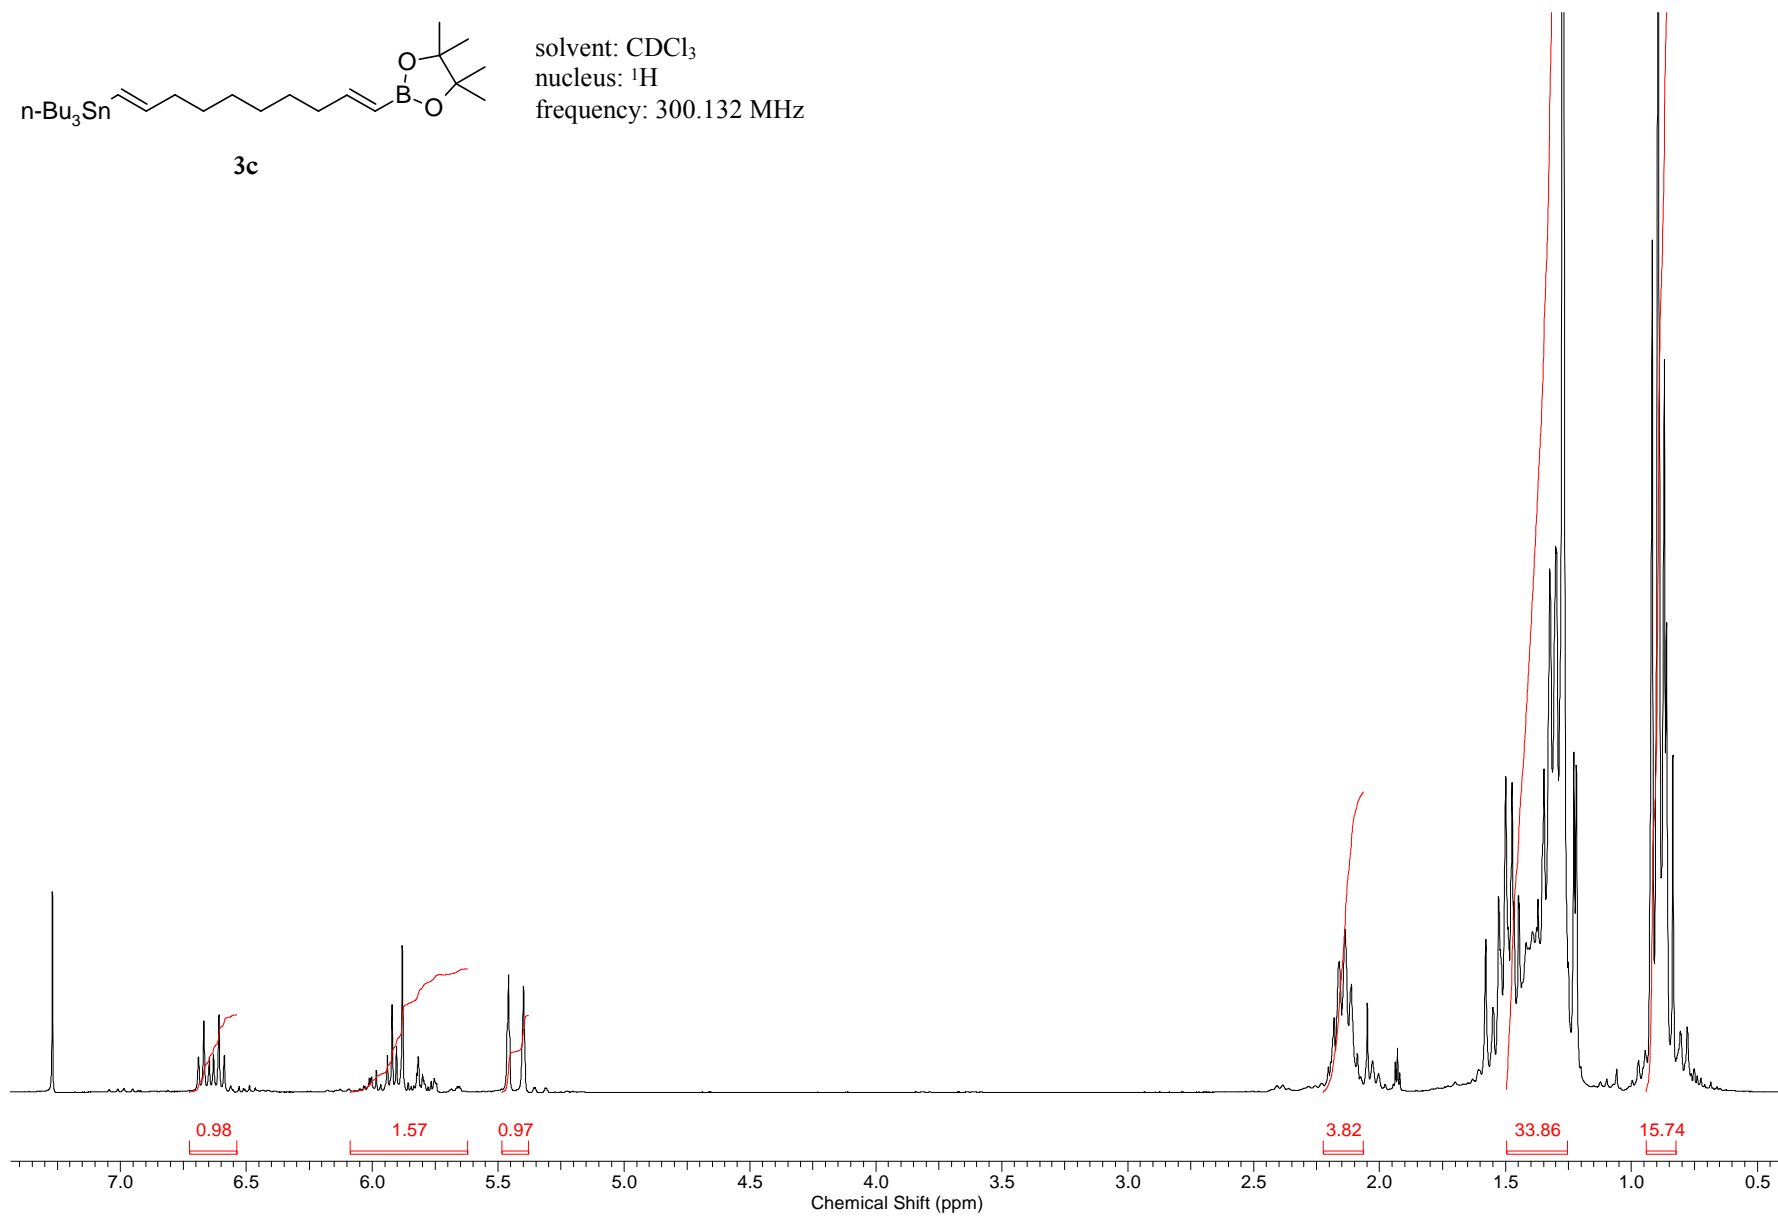

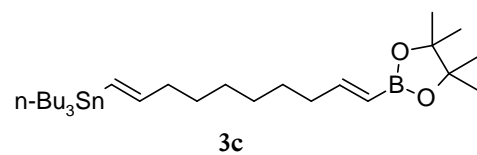

solvent: CDCl<sub>3</sub>  
nucleus: <sup>13</sup>C  
frequency: 75.48 MHz

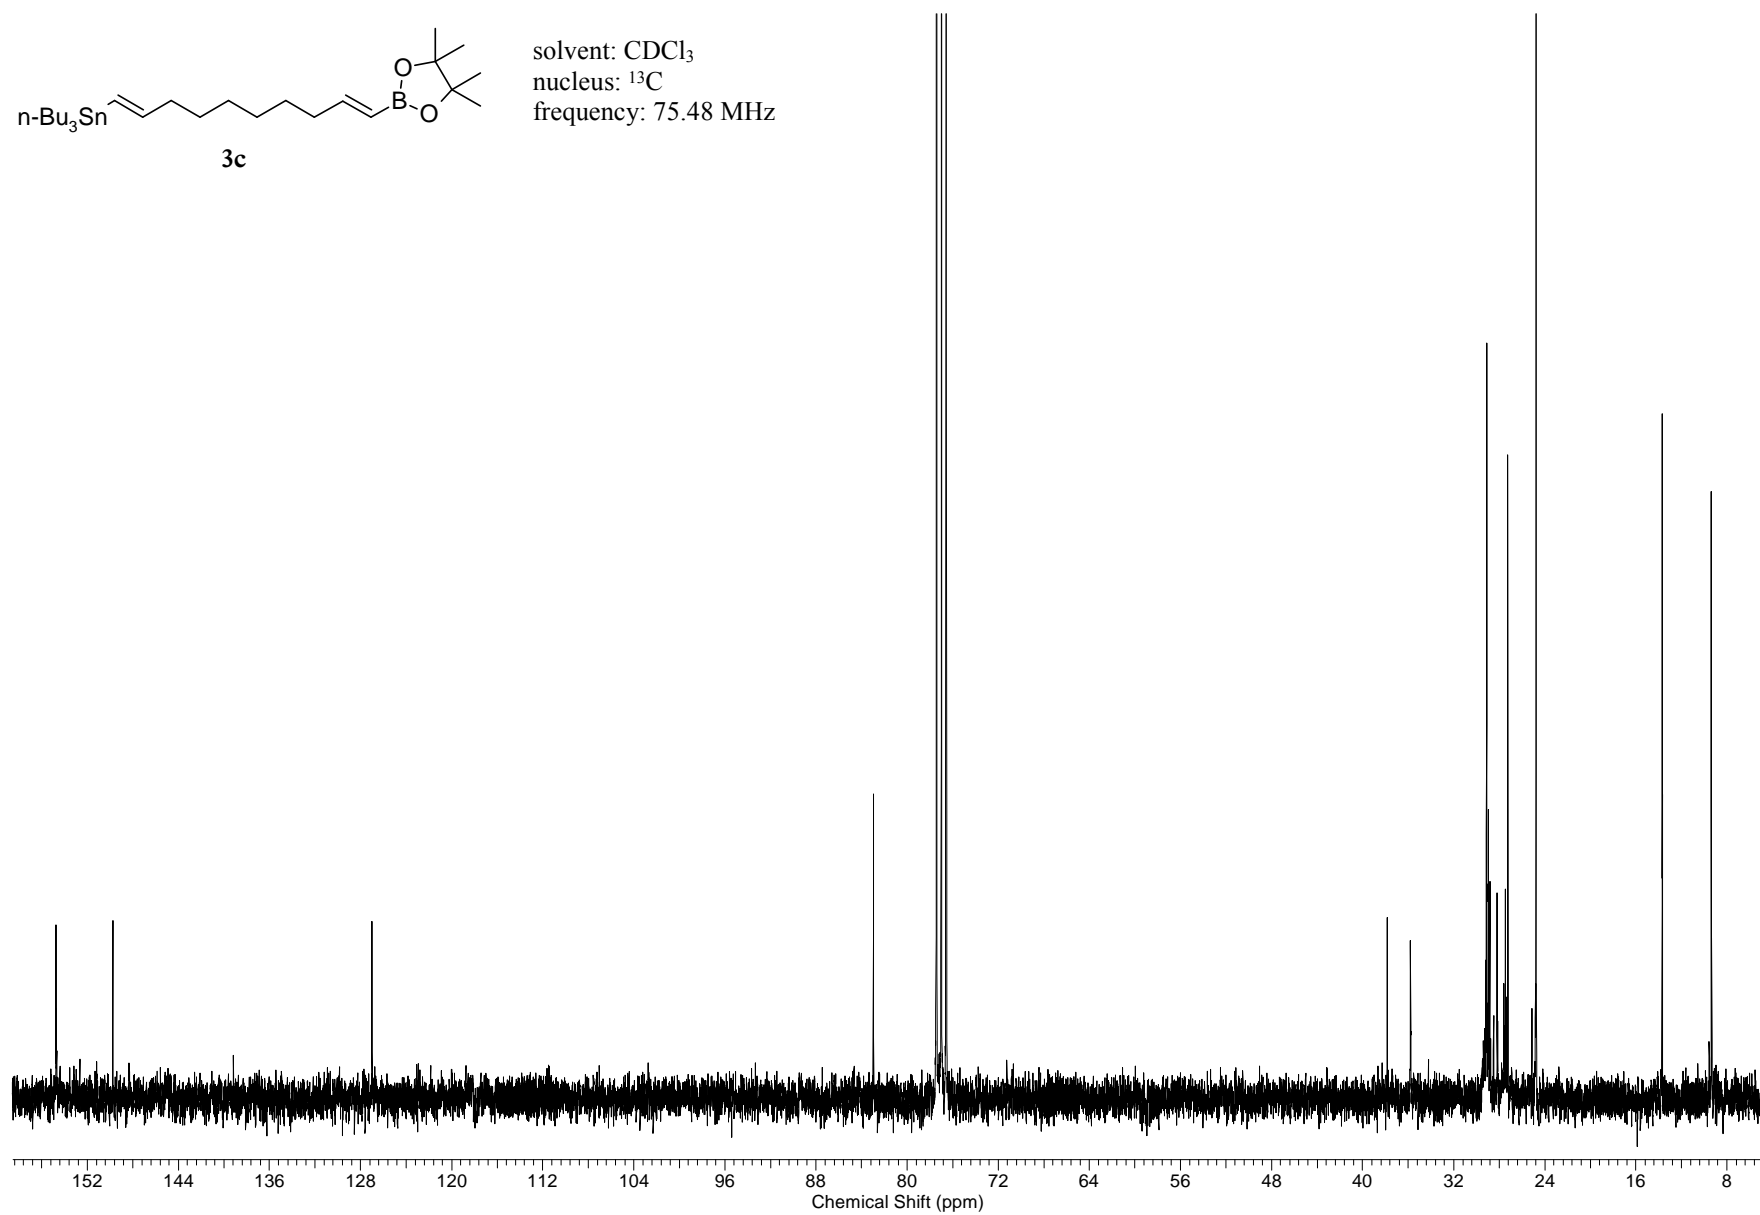

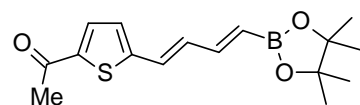

**12a**

solvent: CDCl<sub>3</sub>  
nucleus: <sup>1</sup>H  
frequency: 300.132 MHz

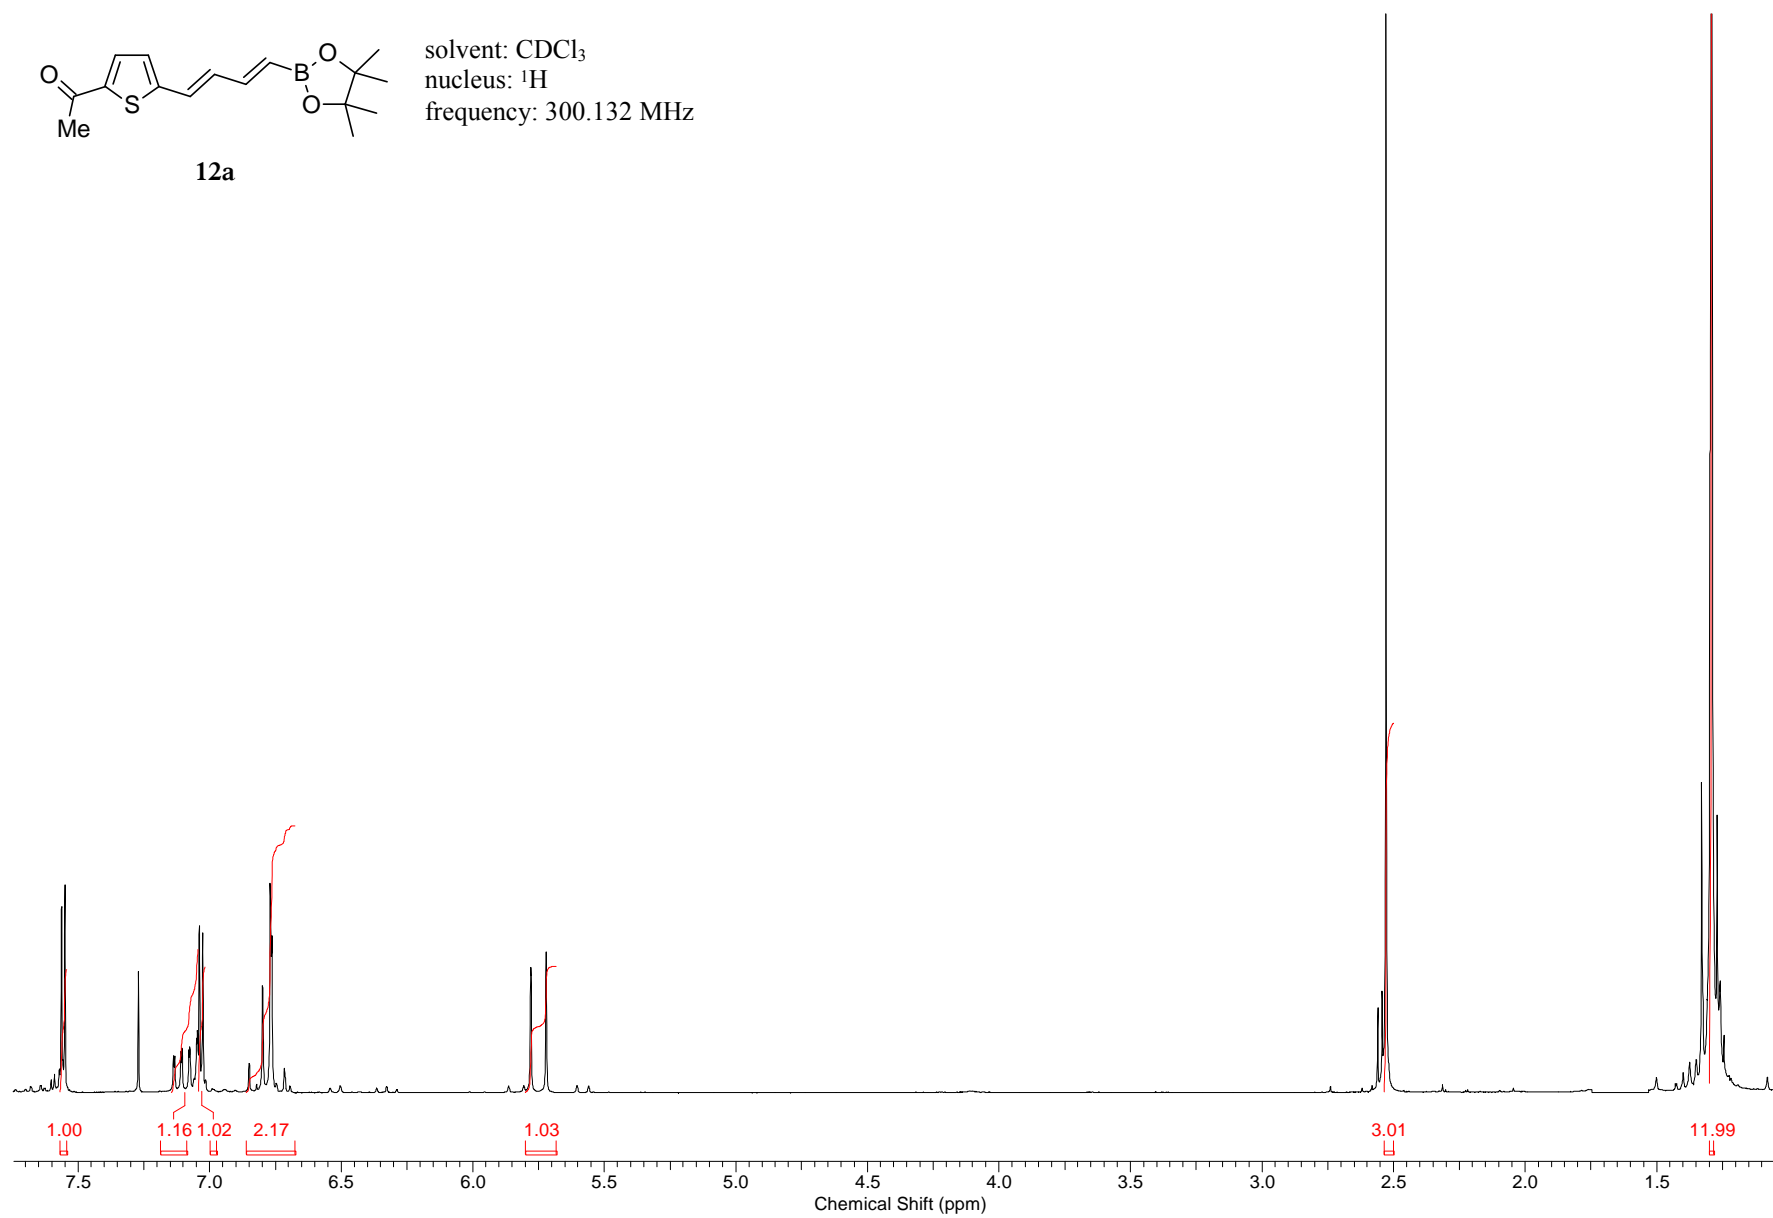

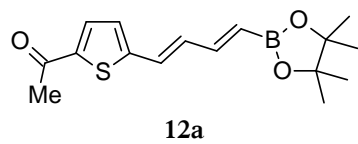

solvent: CDCl<sub>3</sub>  
nucleus: <sup>13</sup>C  
frequency: 75.48 MHz

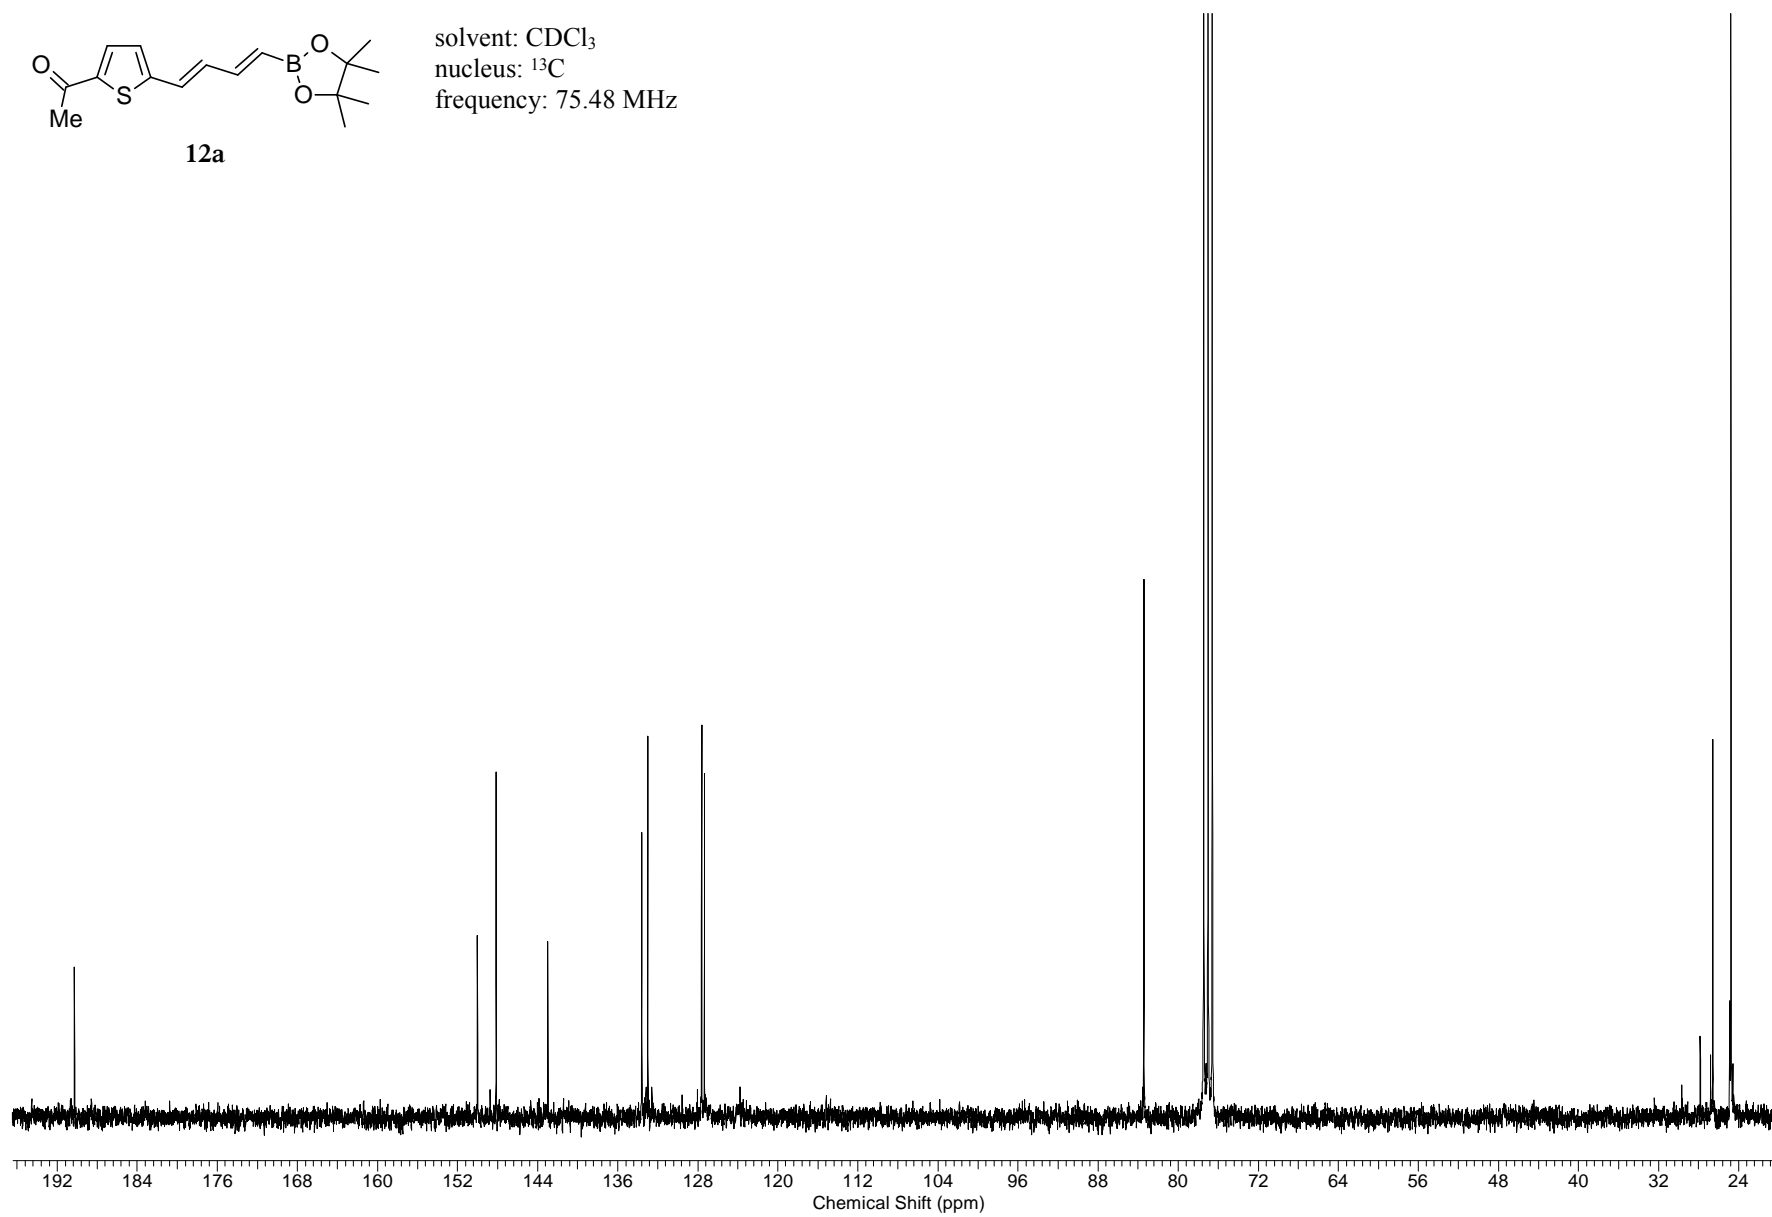

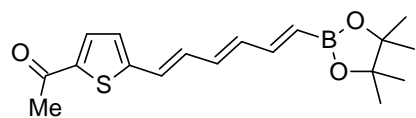

12b

solvent: CDCl<sub>3</sub>  
nucleus: <sup>1</sup>H  
frequency: 300.132 MHz

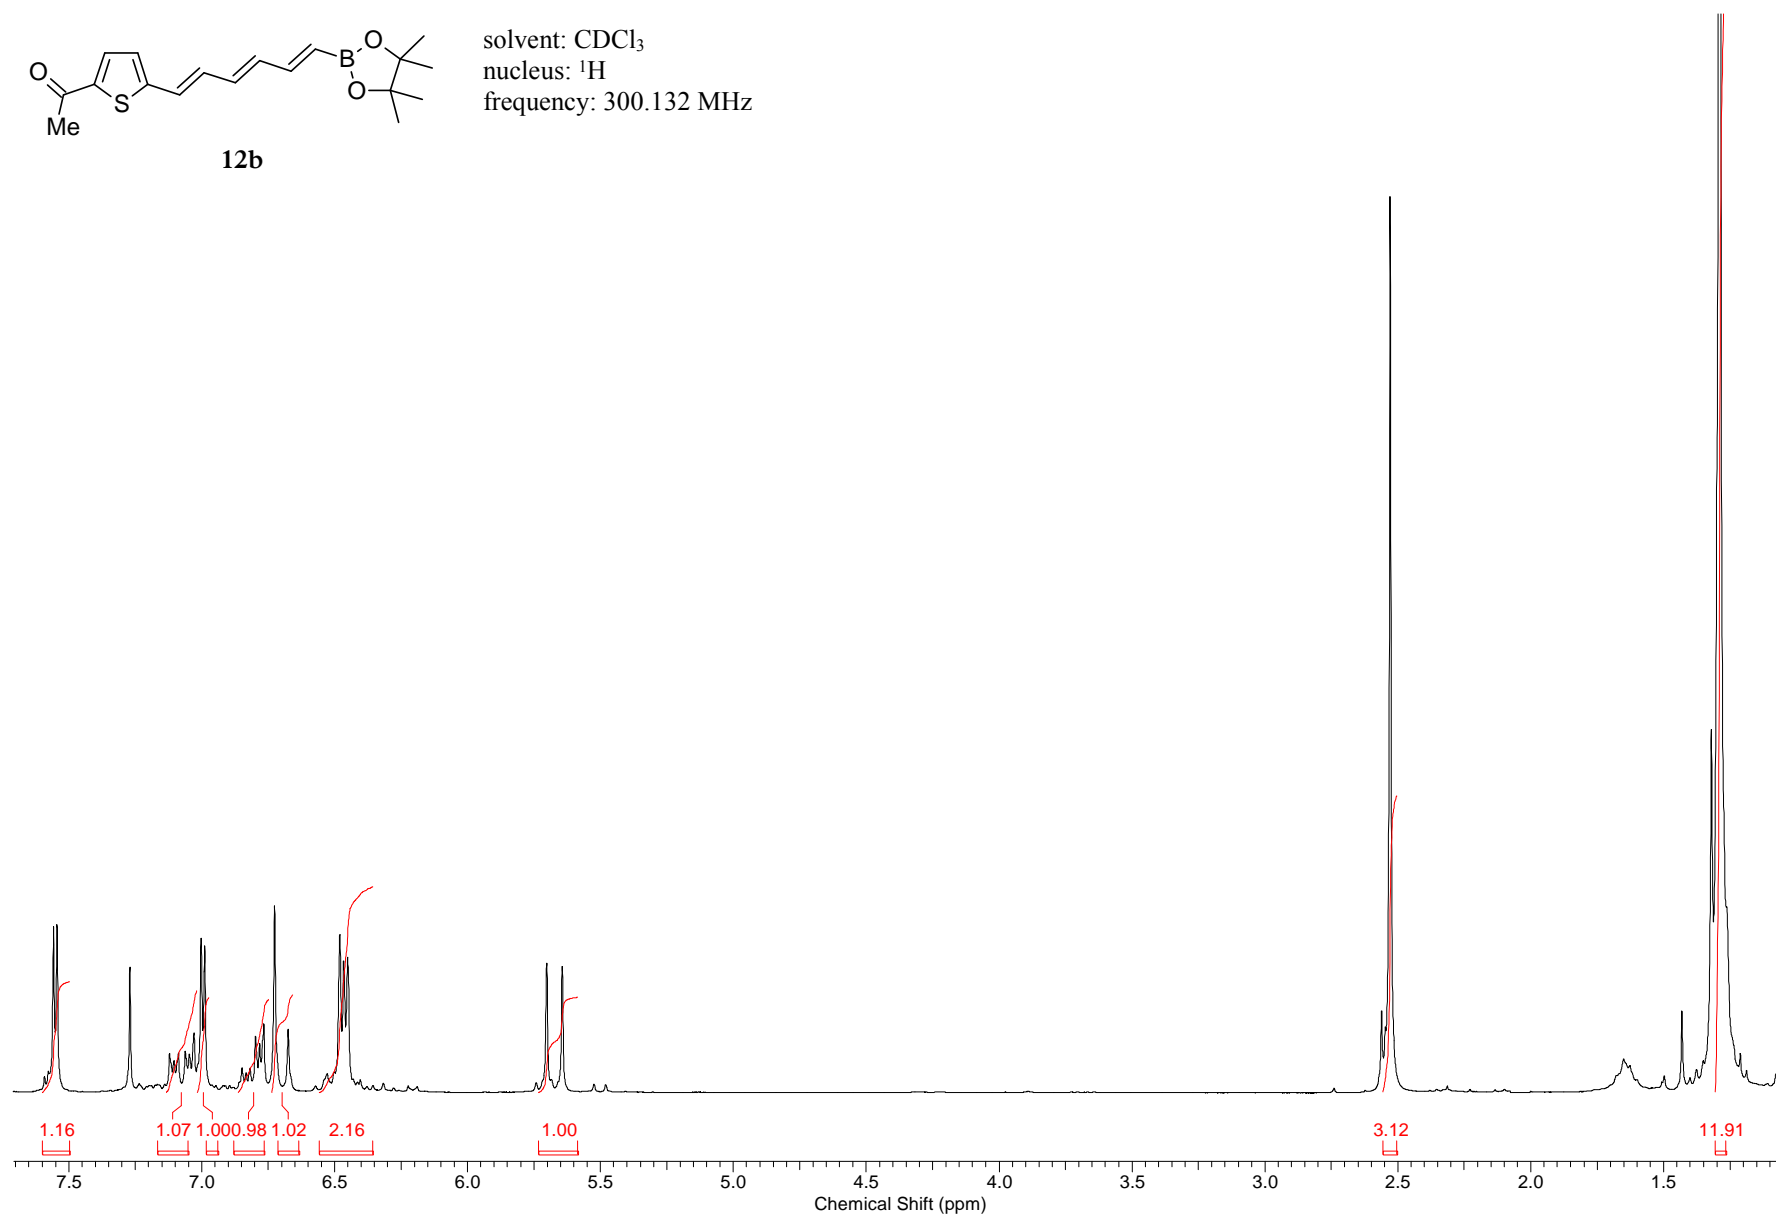

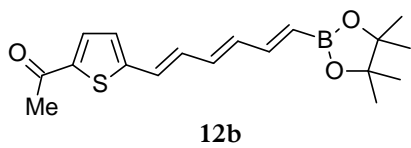

solvent: CDCl<sub>3</sub>  
nucleus: <sup>13</sup>C  
frequency: 75.48 MHz

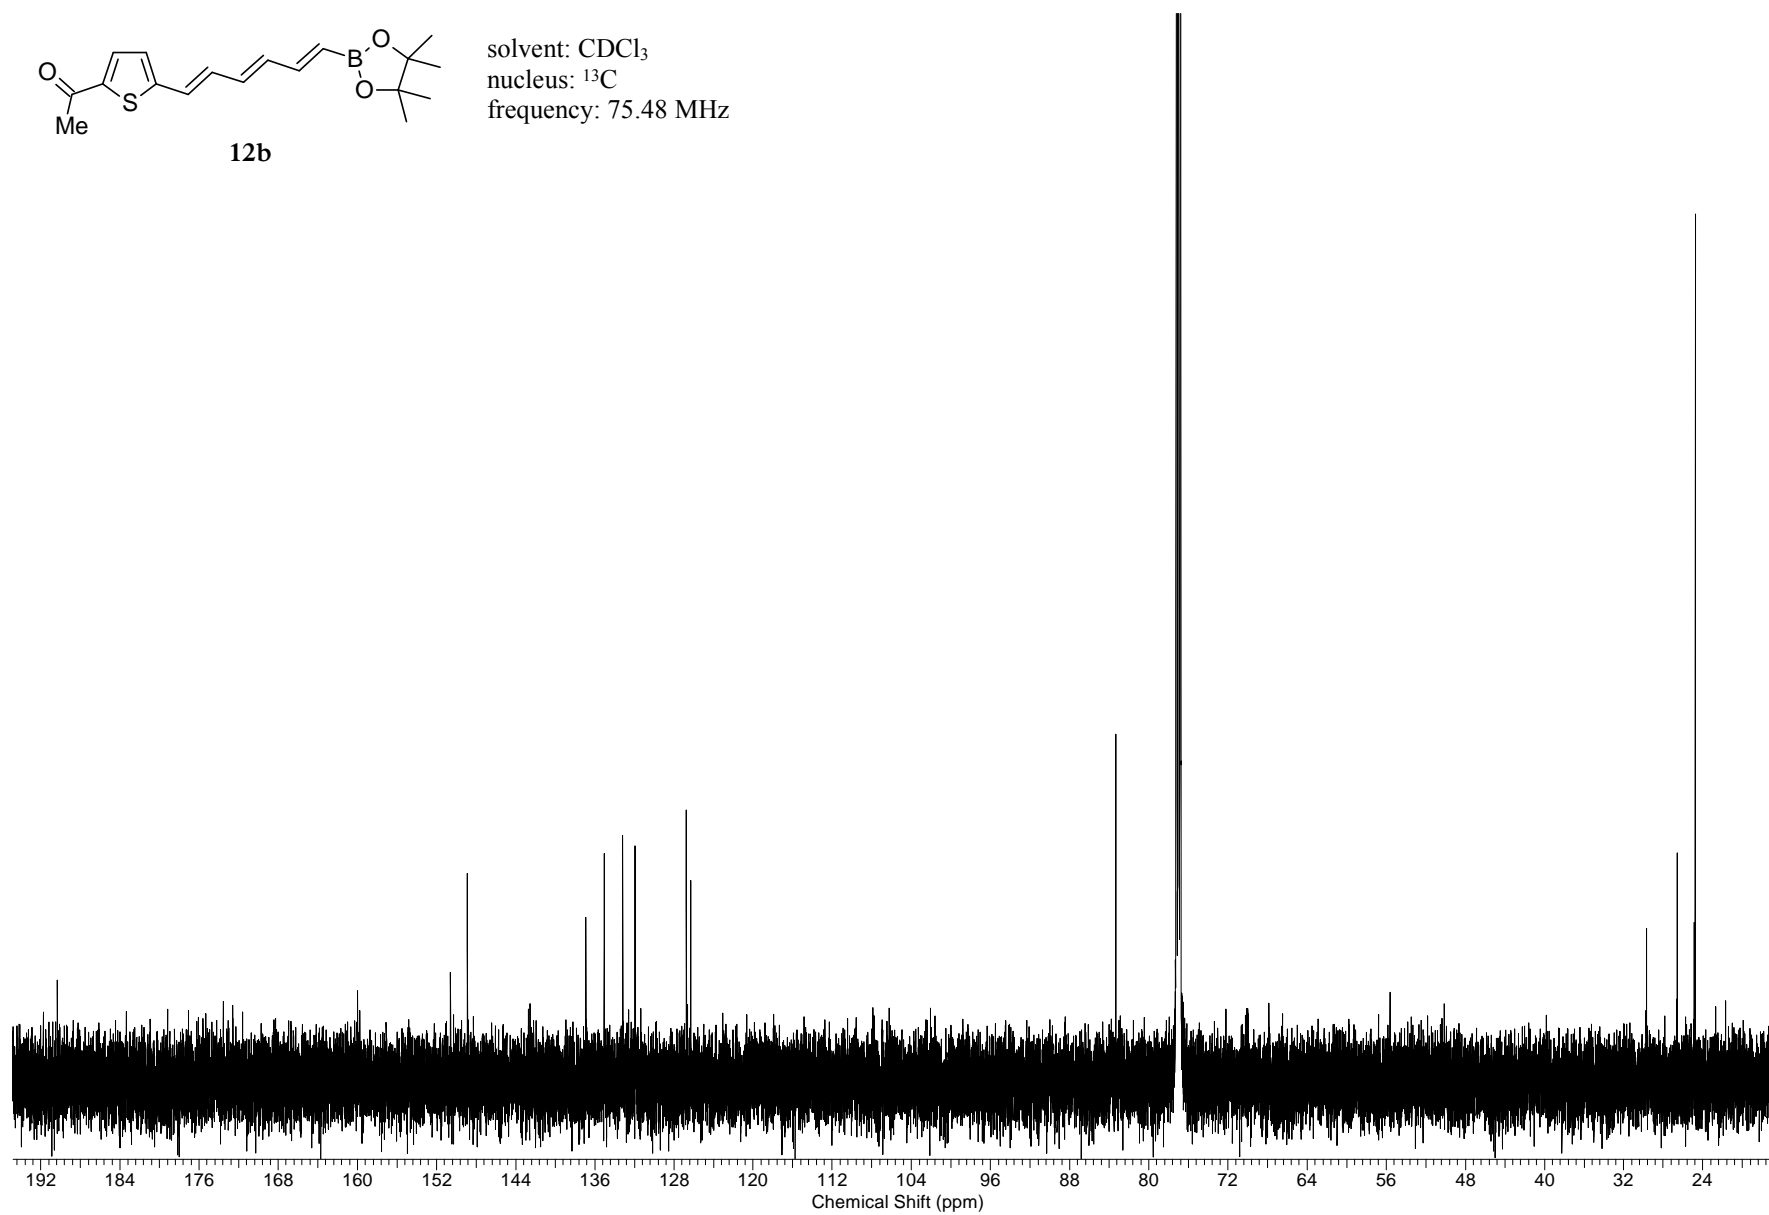



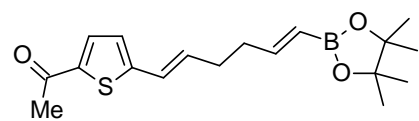

14a

solvent: CDCl<sub>3</sub>  
nucleus: <sup>1</sup>H  
frequency: 300.132 MHz

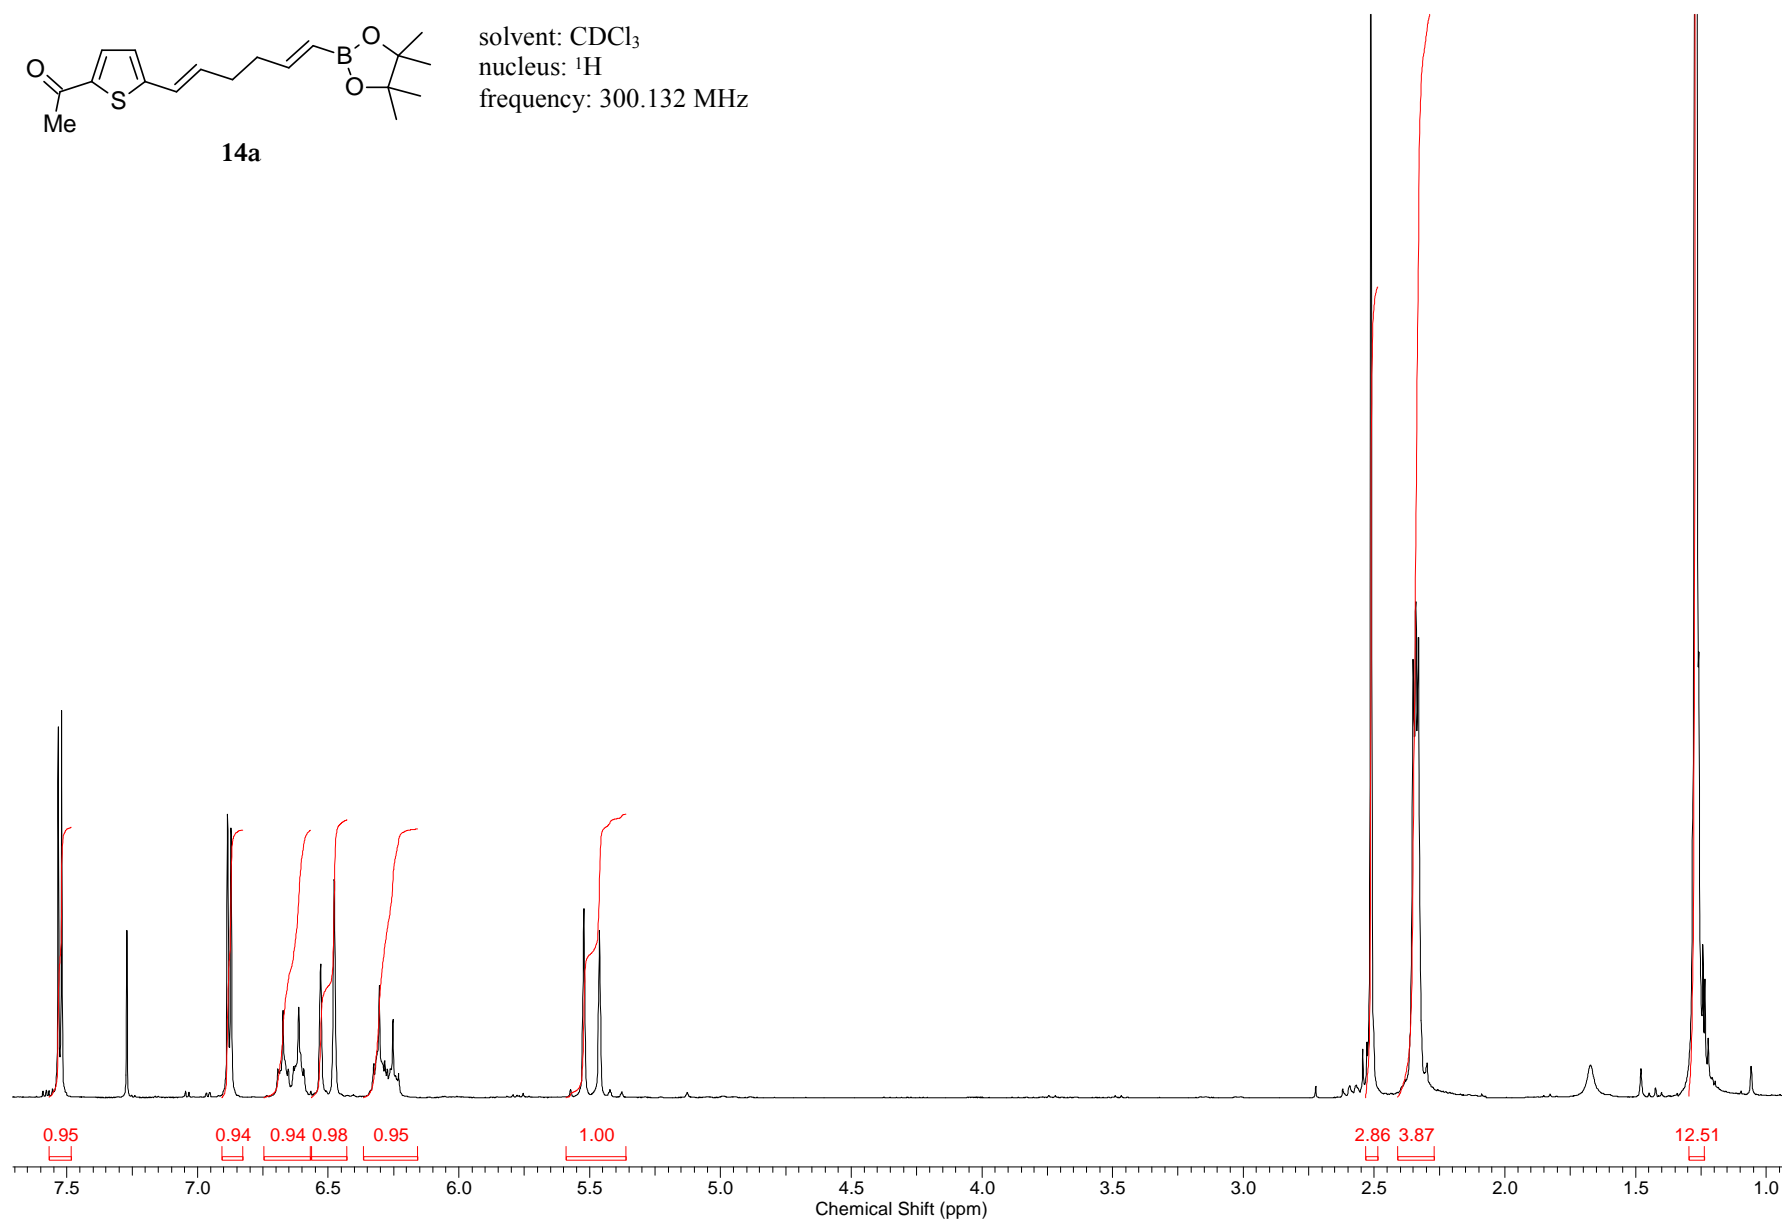

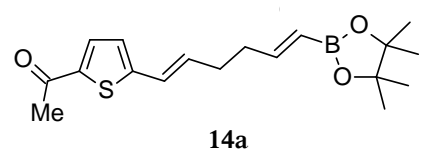

solvent: CDCl<sub>3</sub>  
nucleus: <sup>13</sup>C  
frequency: 75.48 MHz

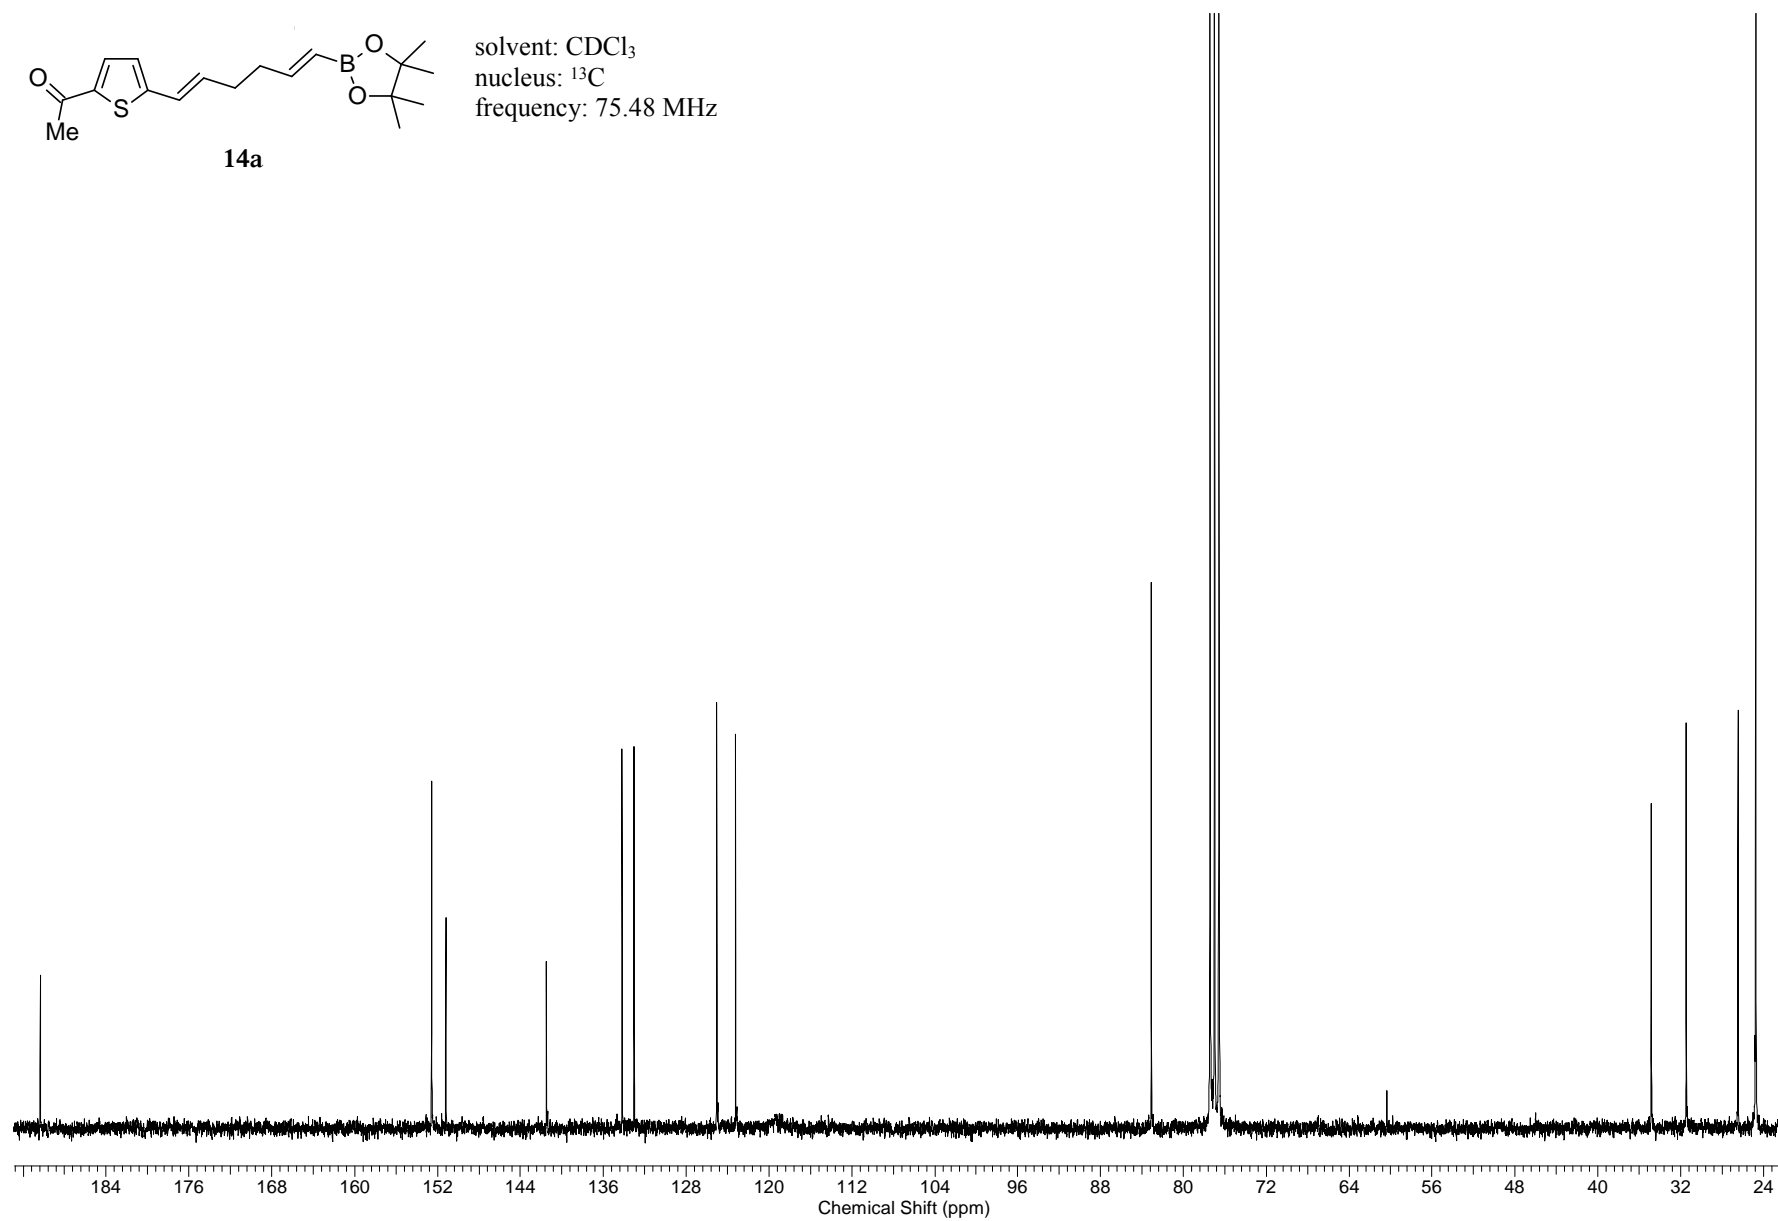

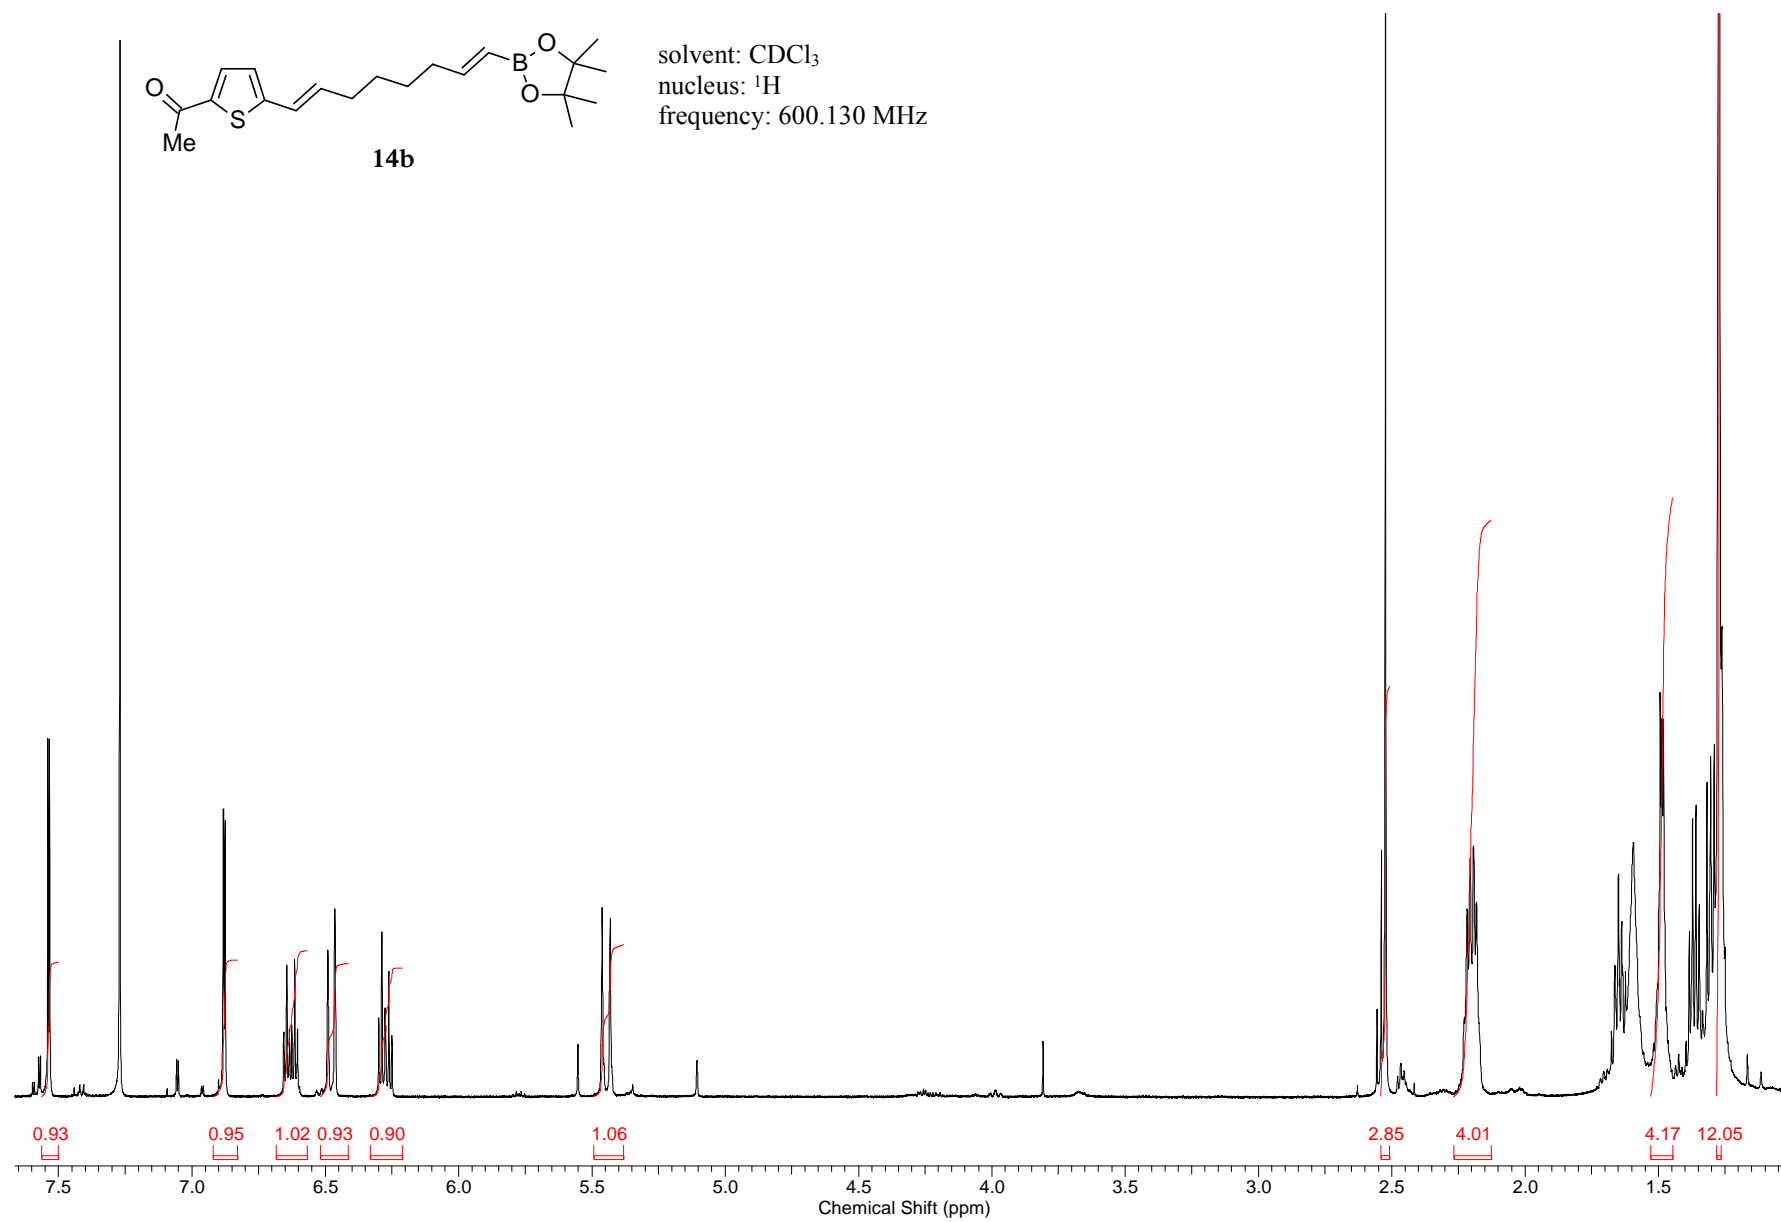

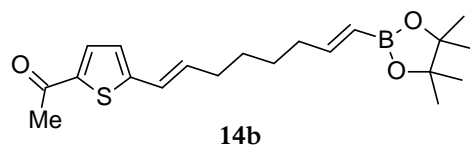

solvent: CDCl<sub>3</sub>  
nucleus: <sup>13</sup>C  
frequency: 150.90 MHz

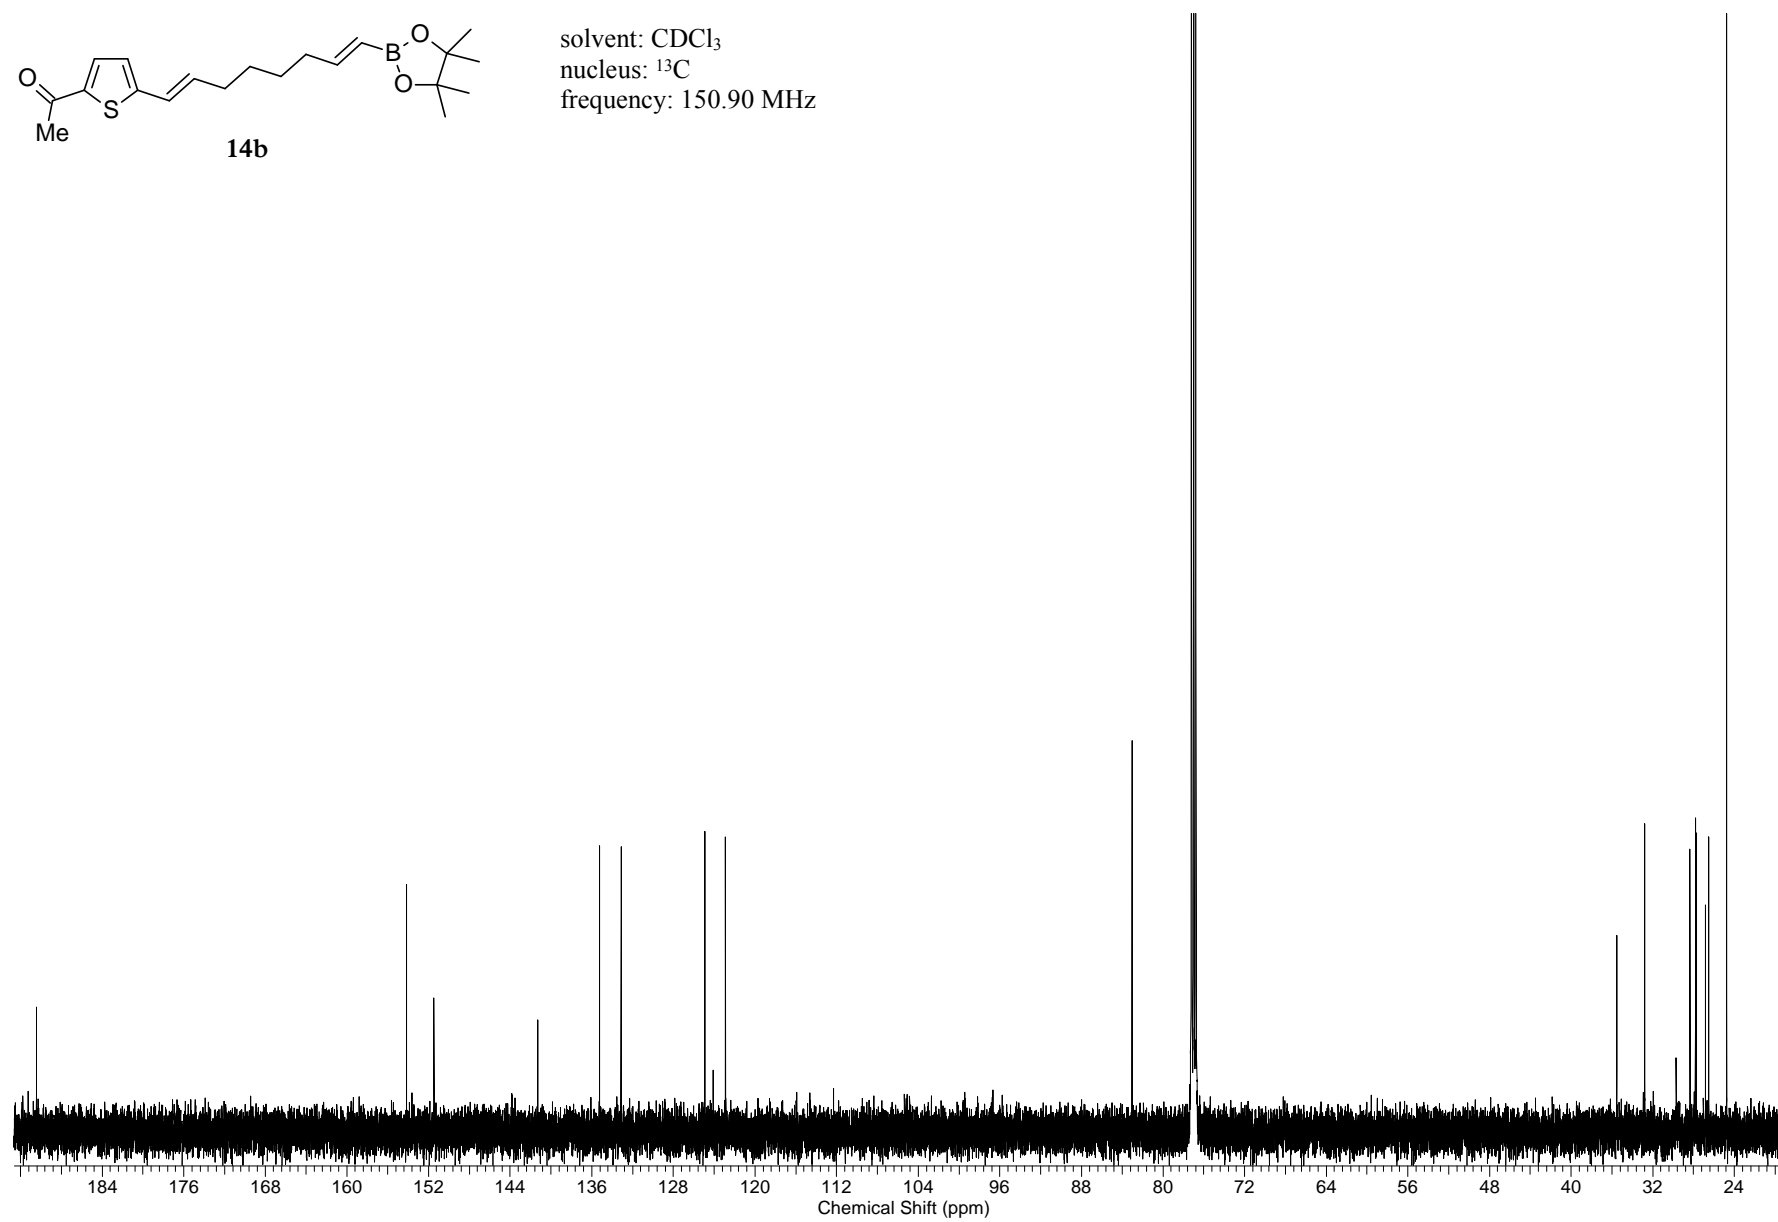

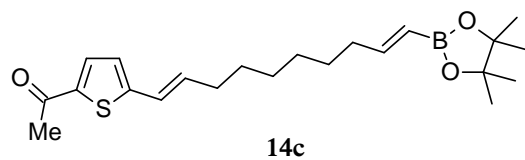

solvent: CDCl<sub>3</sub>  
nucleus: <sup>1</sup>H  
frequency: 300.132 MHz

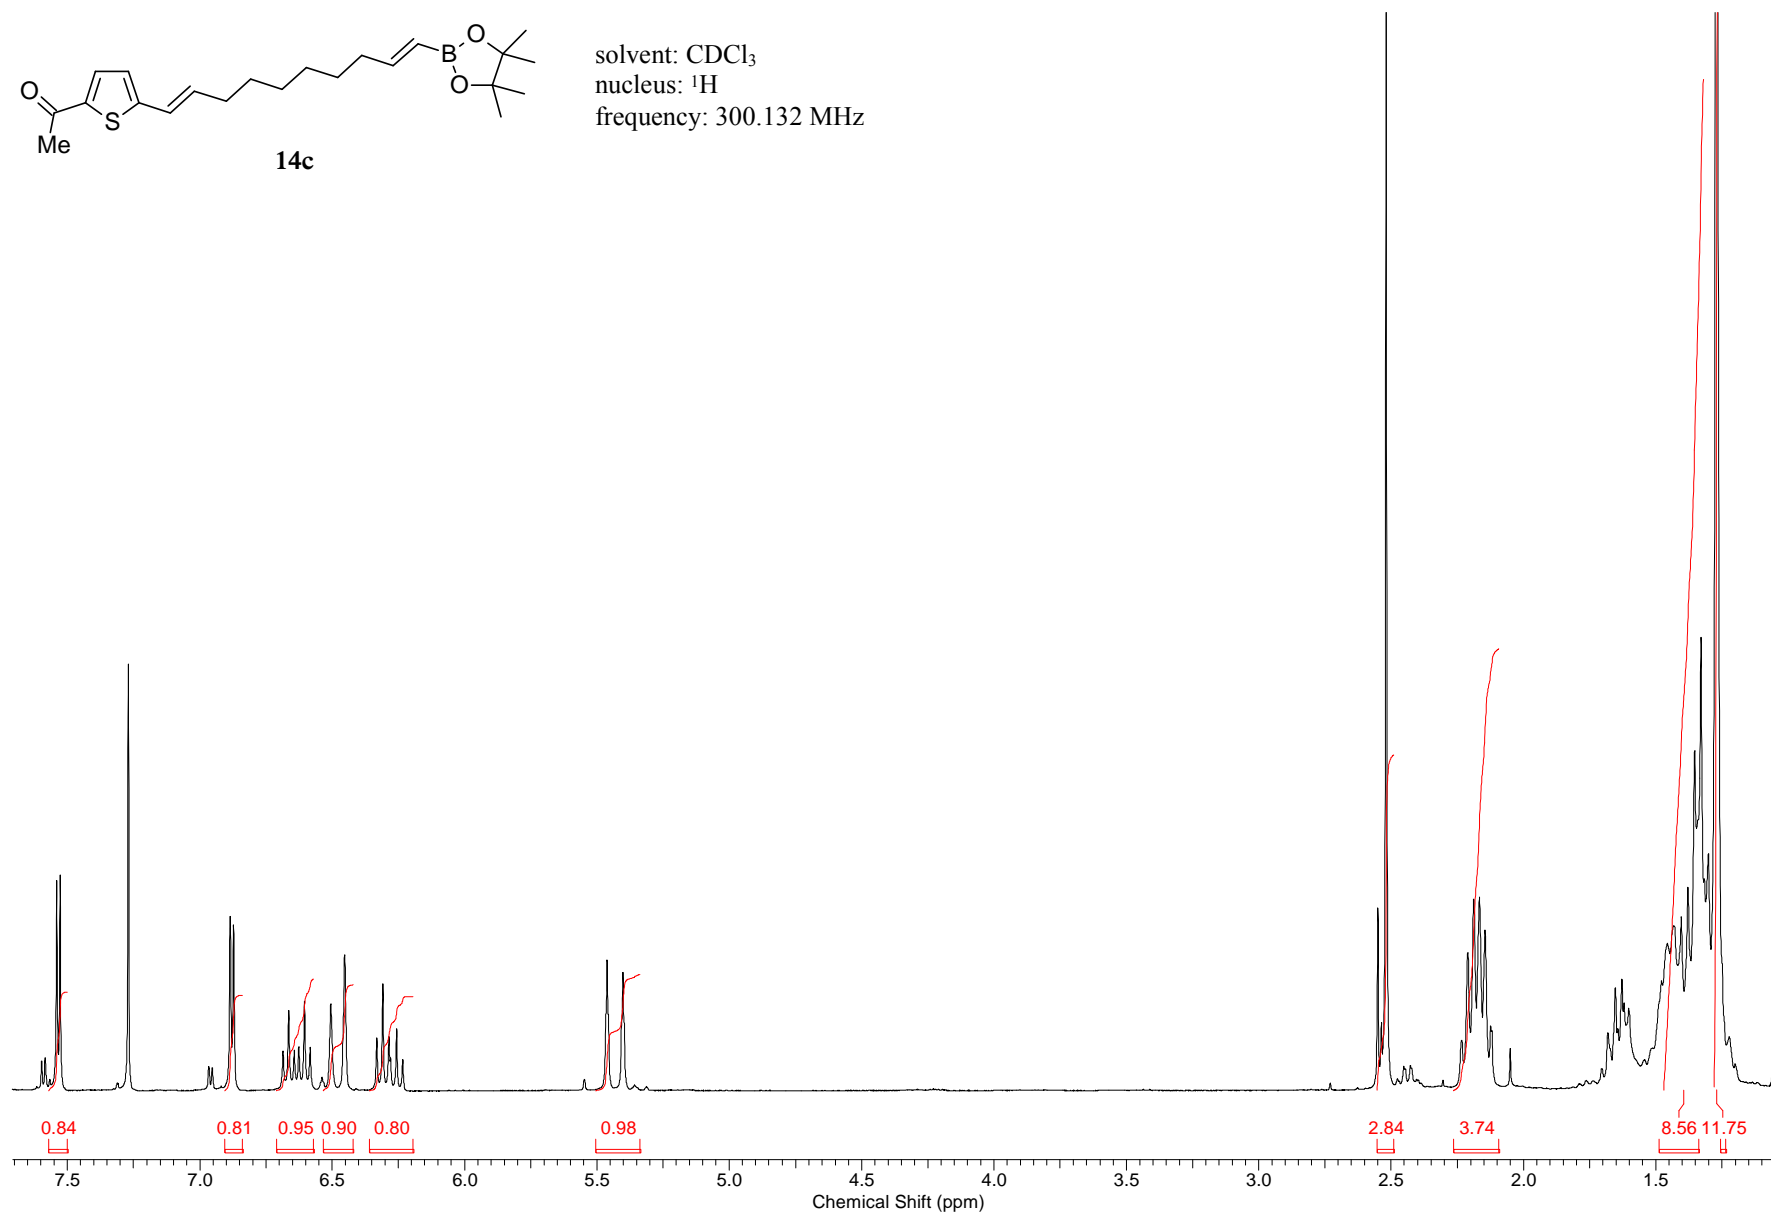

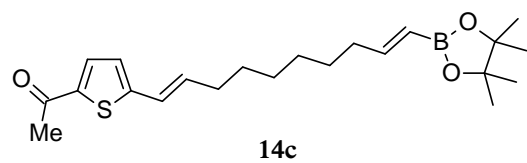

solvent: CDCl<sub>3</sub>  
nucleus: <sup>13</sup>C  
frequency: 75.48 MHz

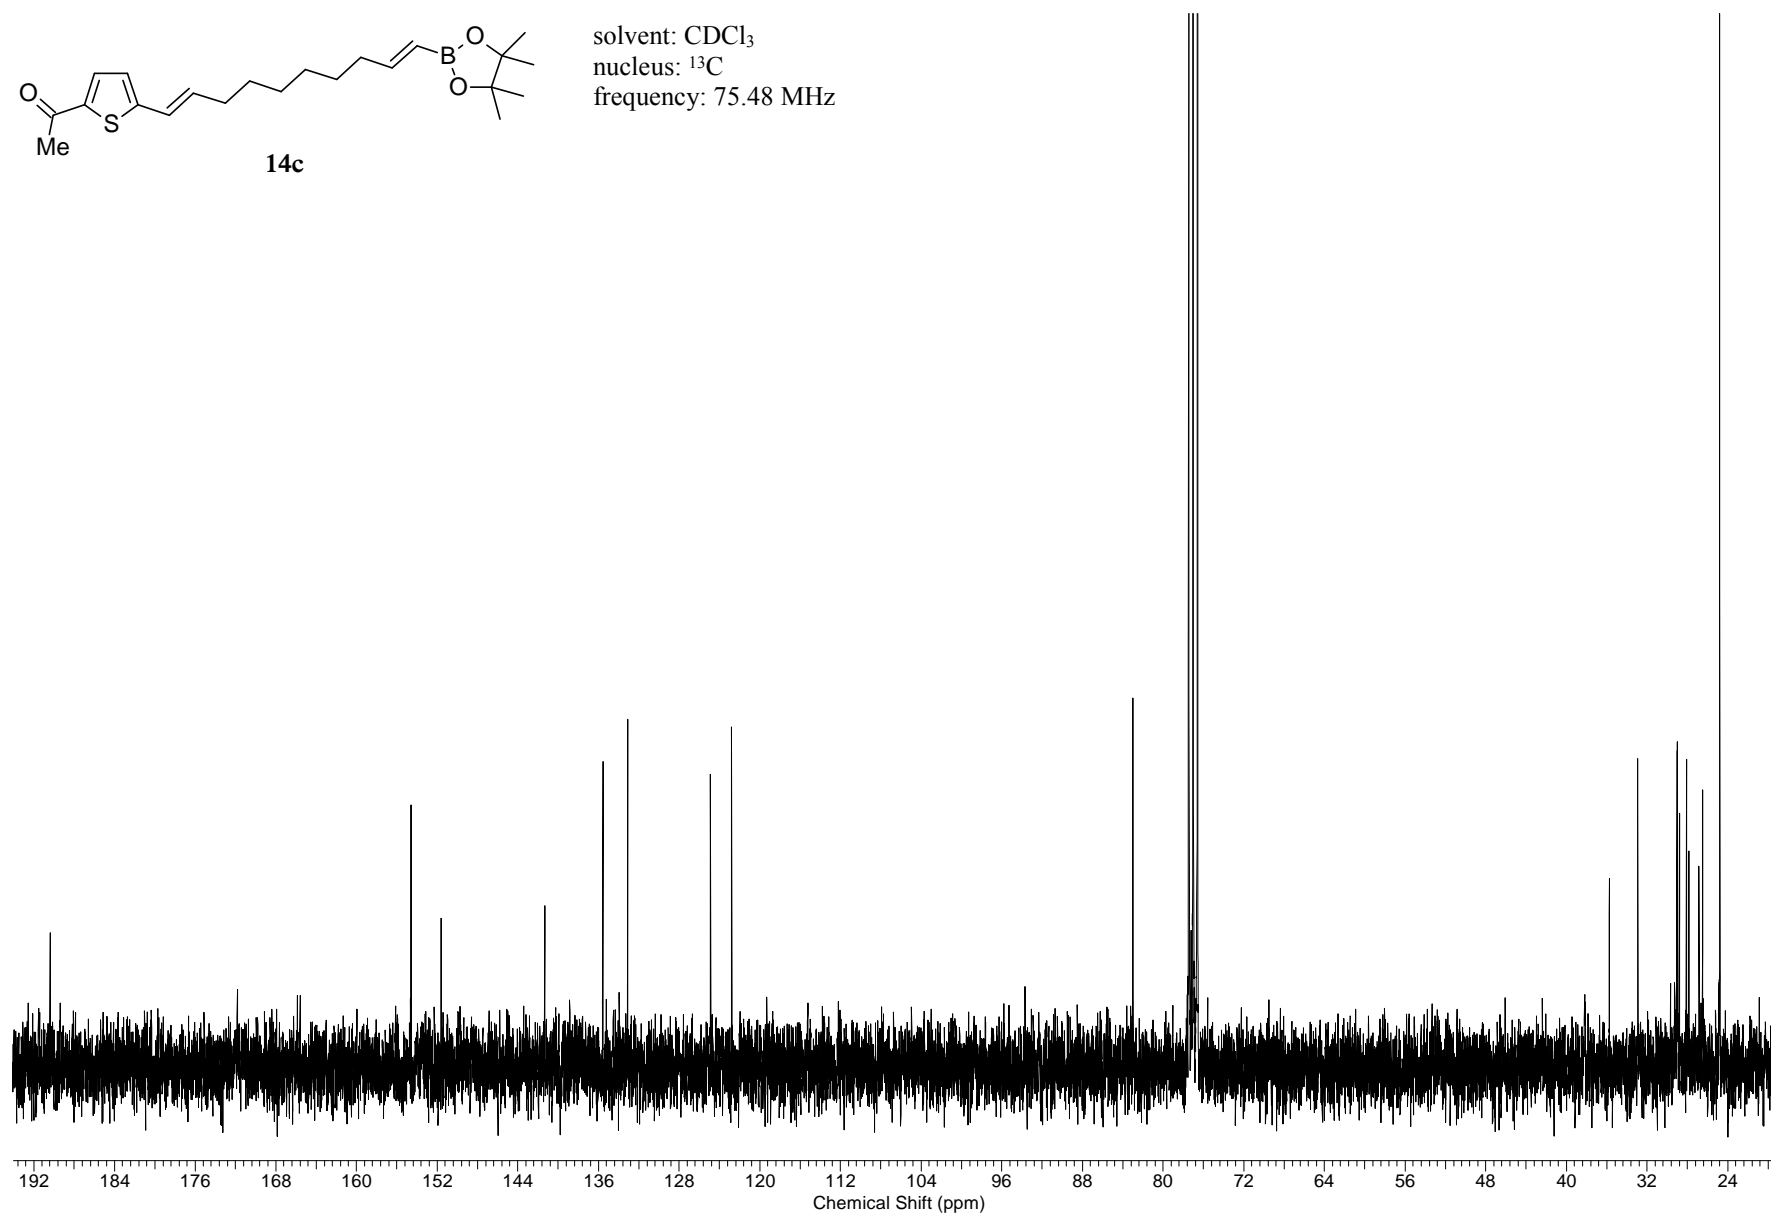

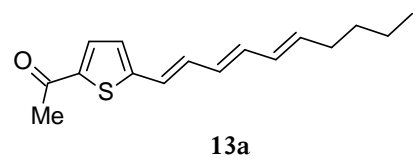

solvent: CDCl<sub>3</sub>  
nucleus: <sup>1</sup>H  
frequency: 300.132 MHz

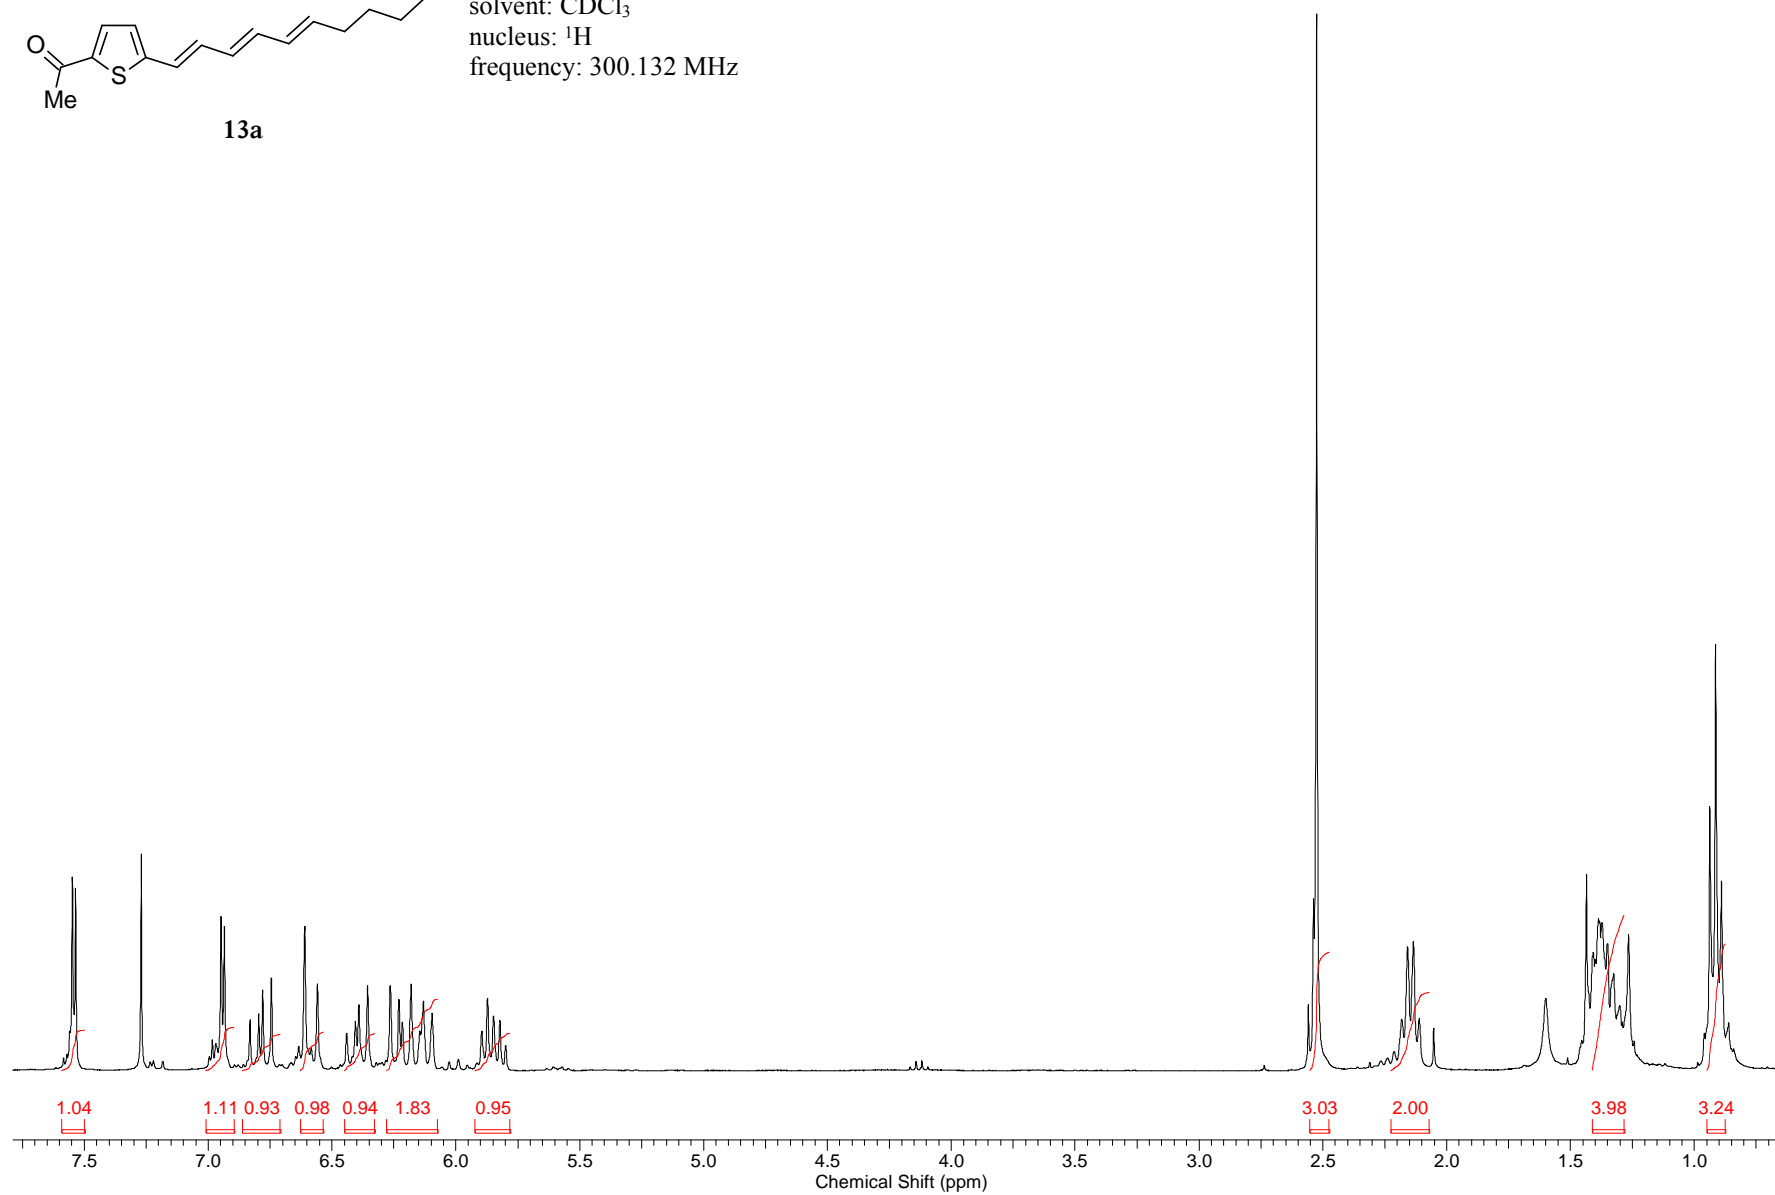

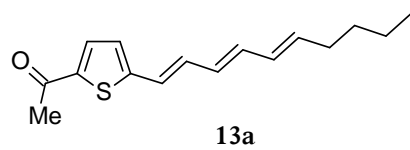

solvent: CDCl<sub>3</sub>  
nucleus: <sup>13</sup>C  
frequency: 75.48 MHz

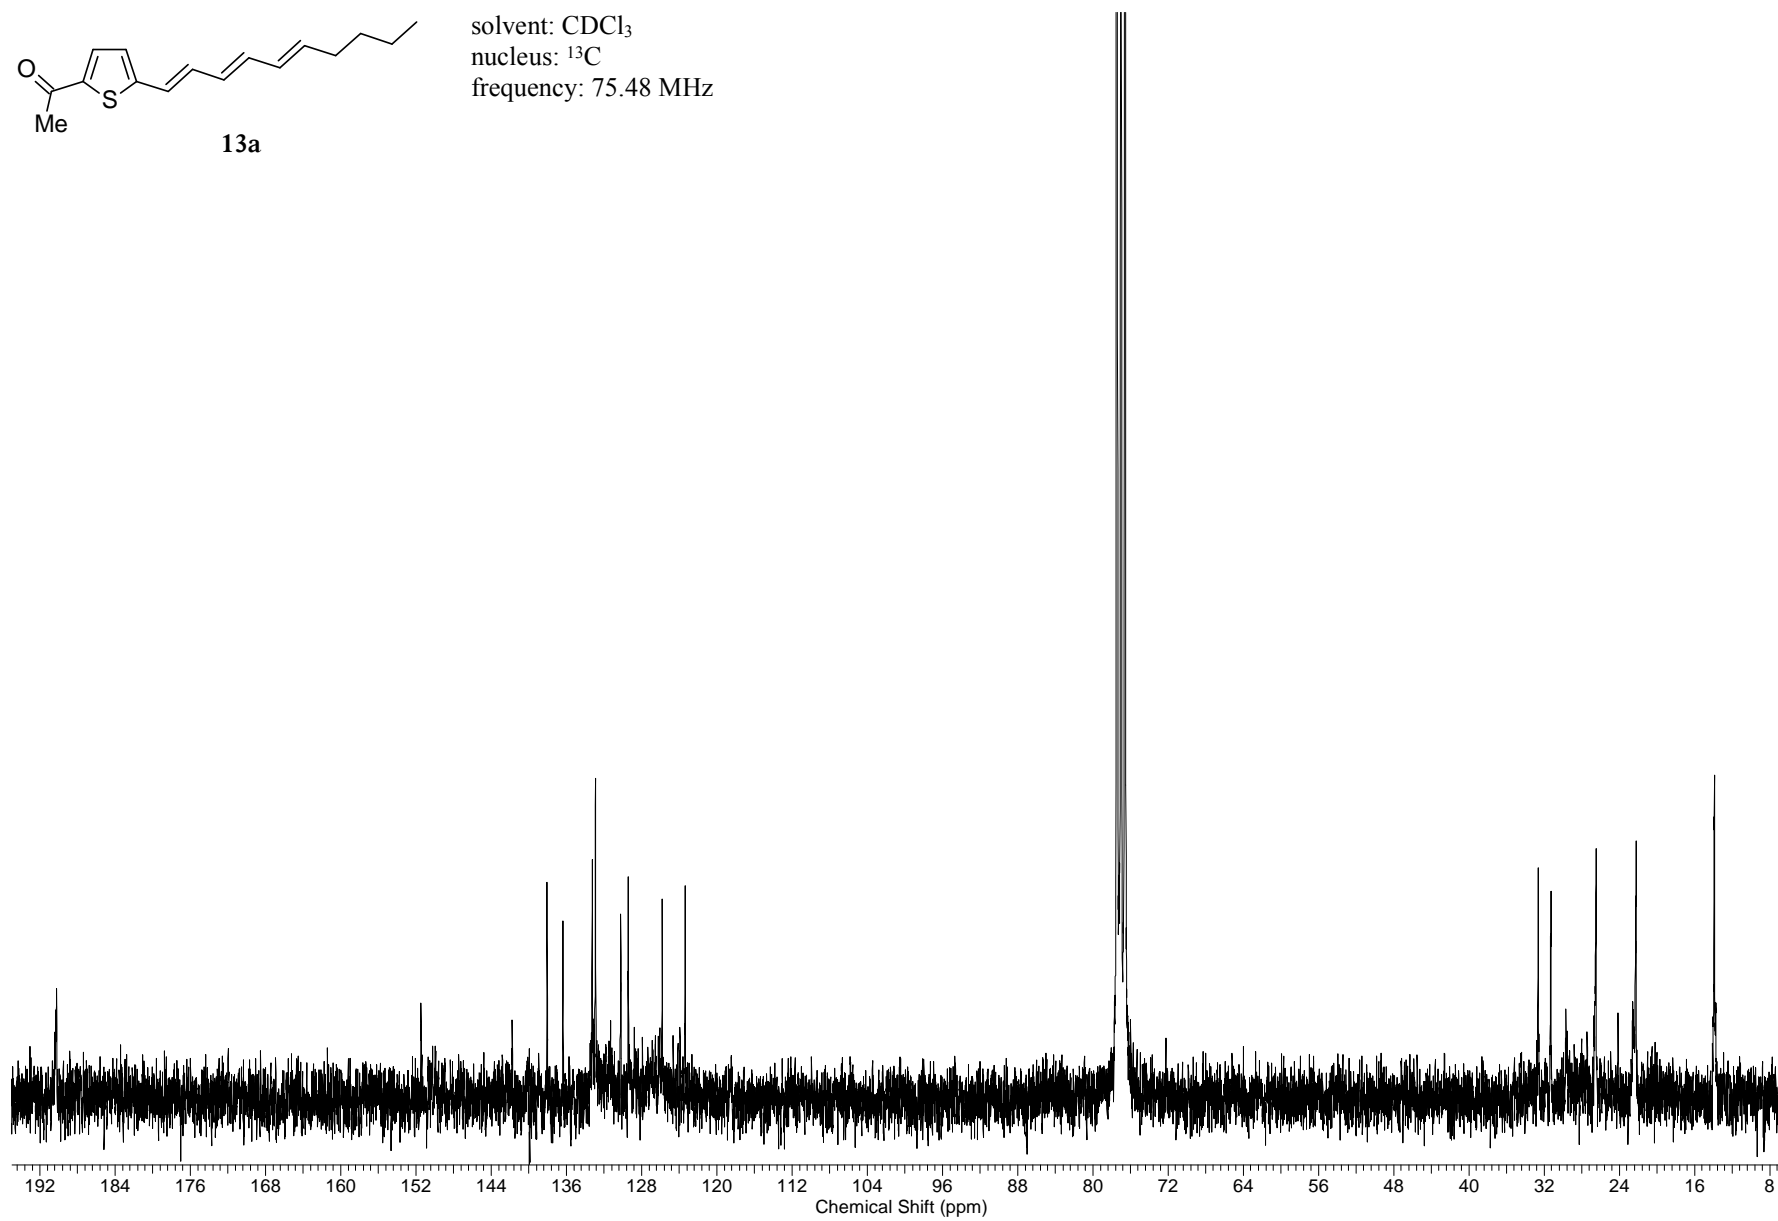



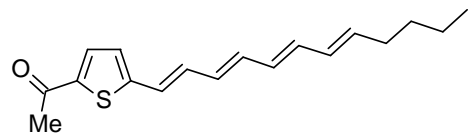

13b

solvent: CDCl<sub>3</sub>  
nucleus: <sup>1</sup>H  
frequency: 600.130 MHz

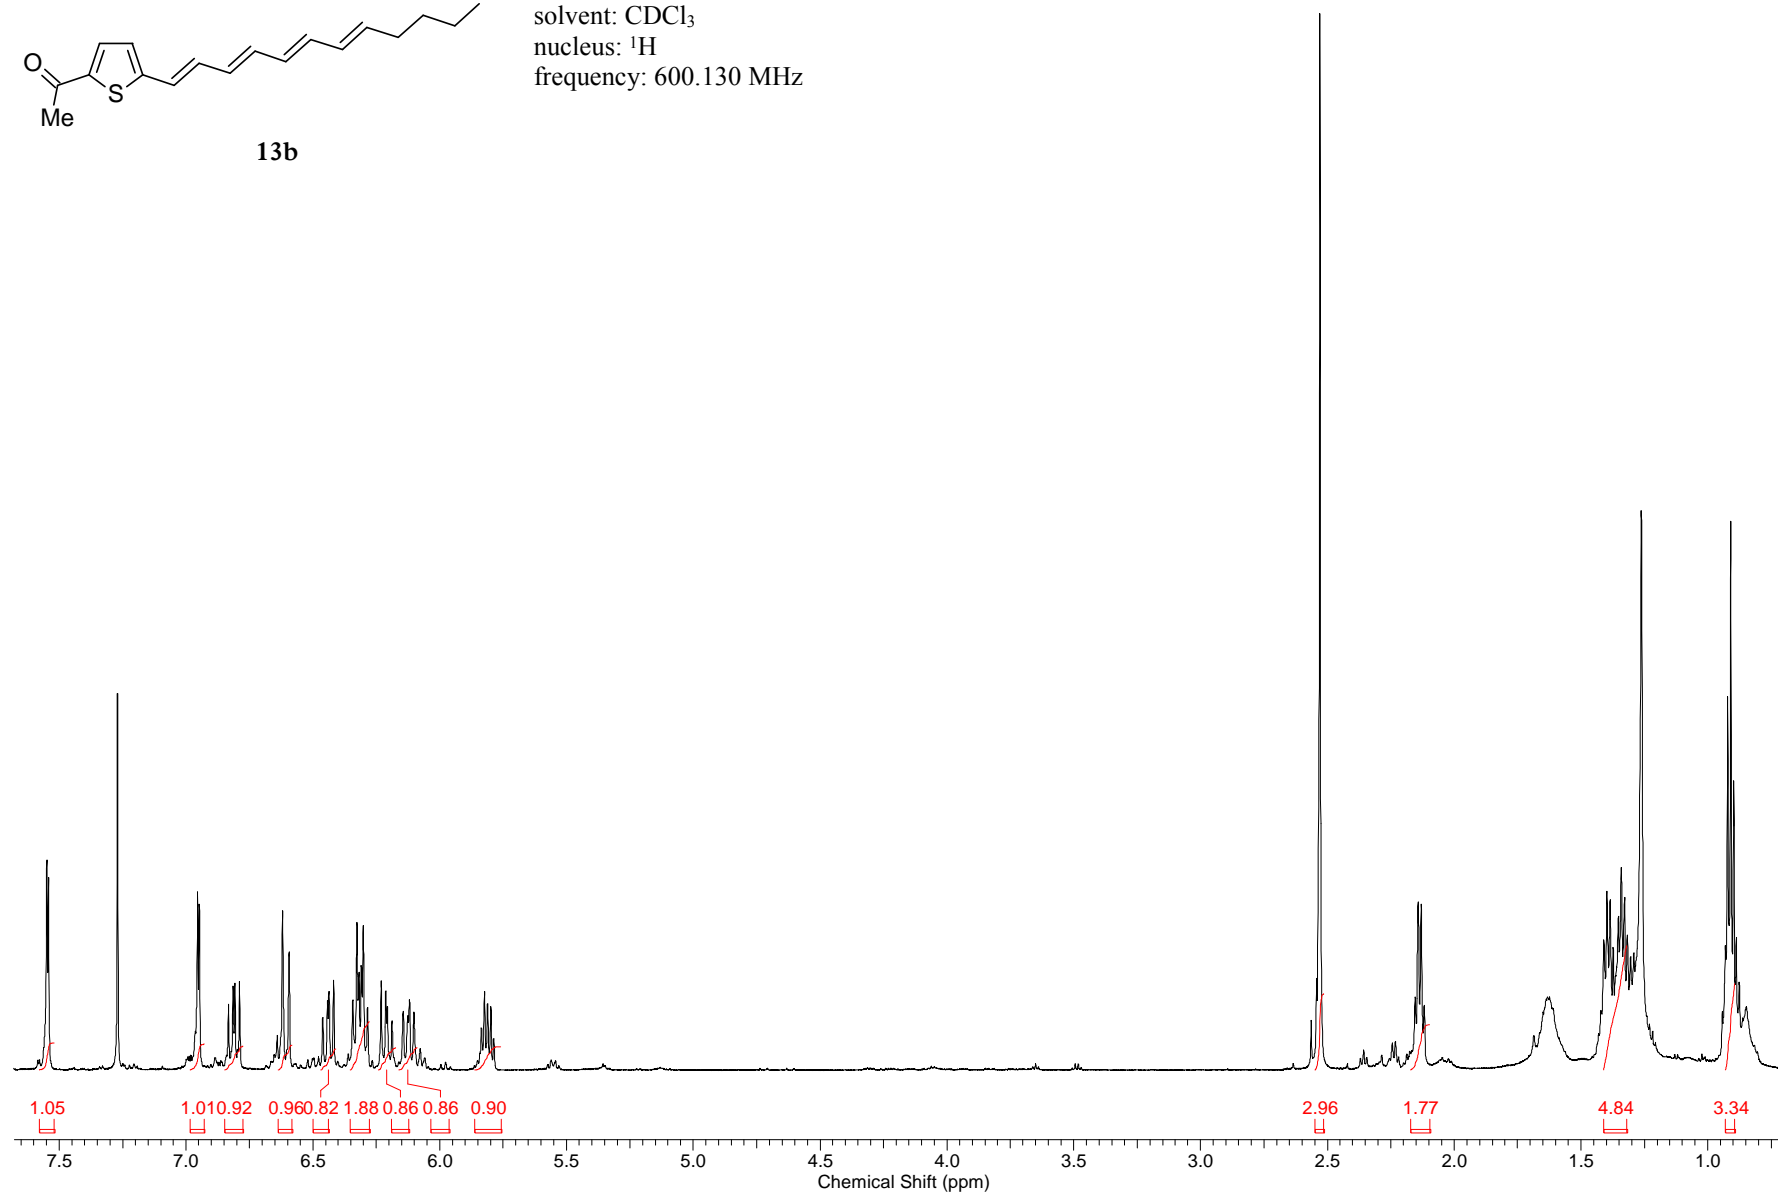

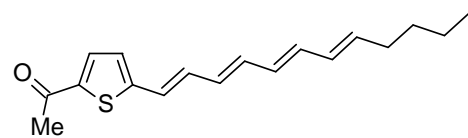

13b

solvent: CDCl<sub>3</sub>  
nucleus: <sup>13</sup>C  
frequency: 150.90 MHz

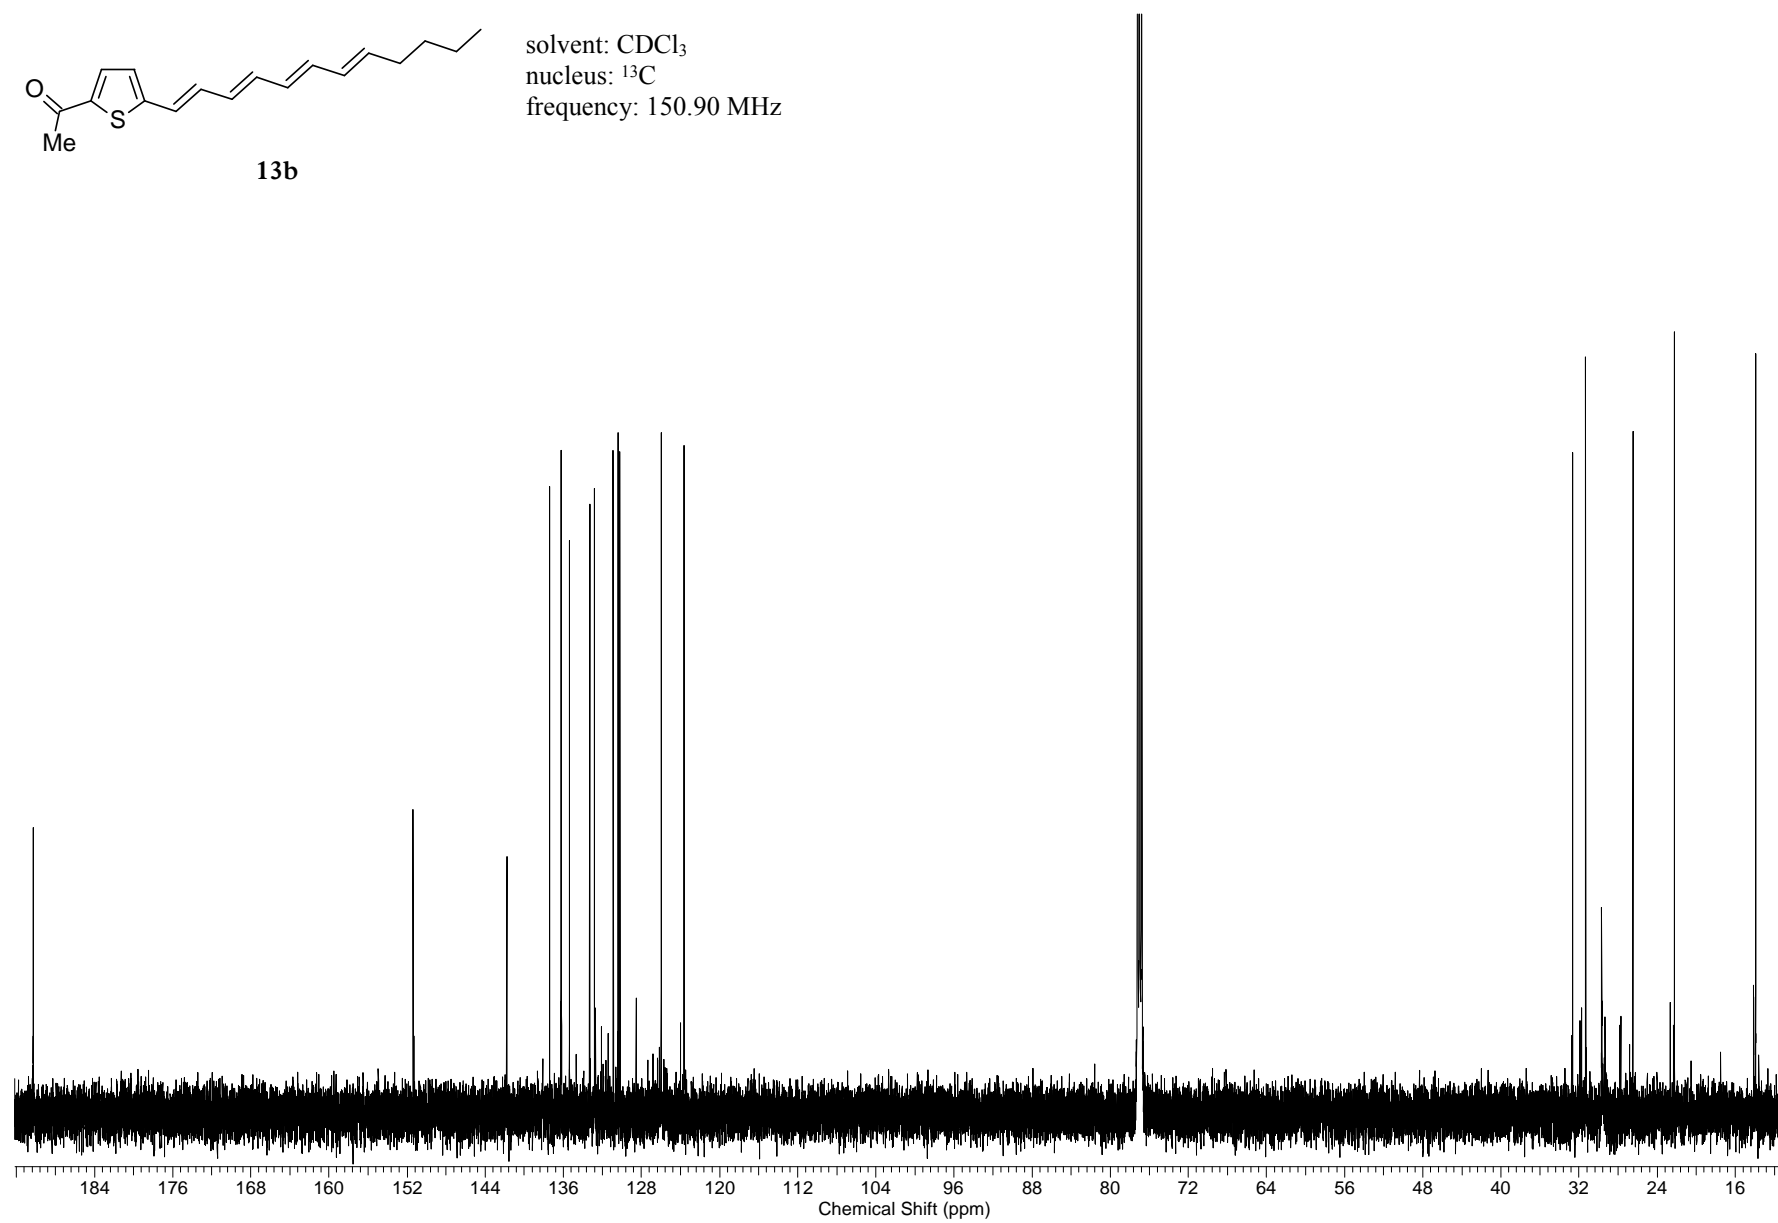

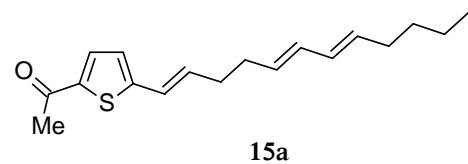

solvent: CDCl<sub>3</sub>  
nucleus: <sup>1</sup>H  
frequency: 399.982 MHz

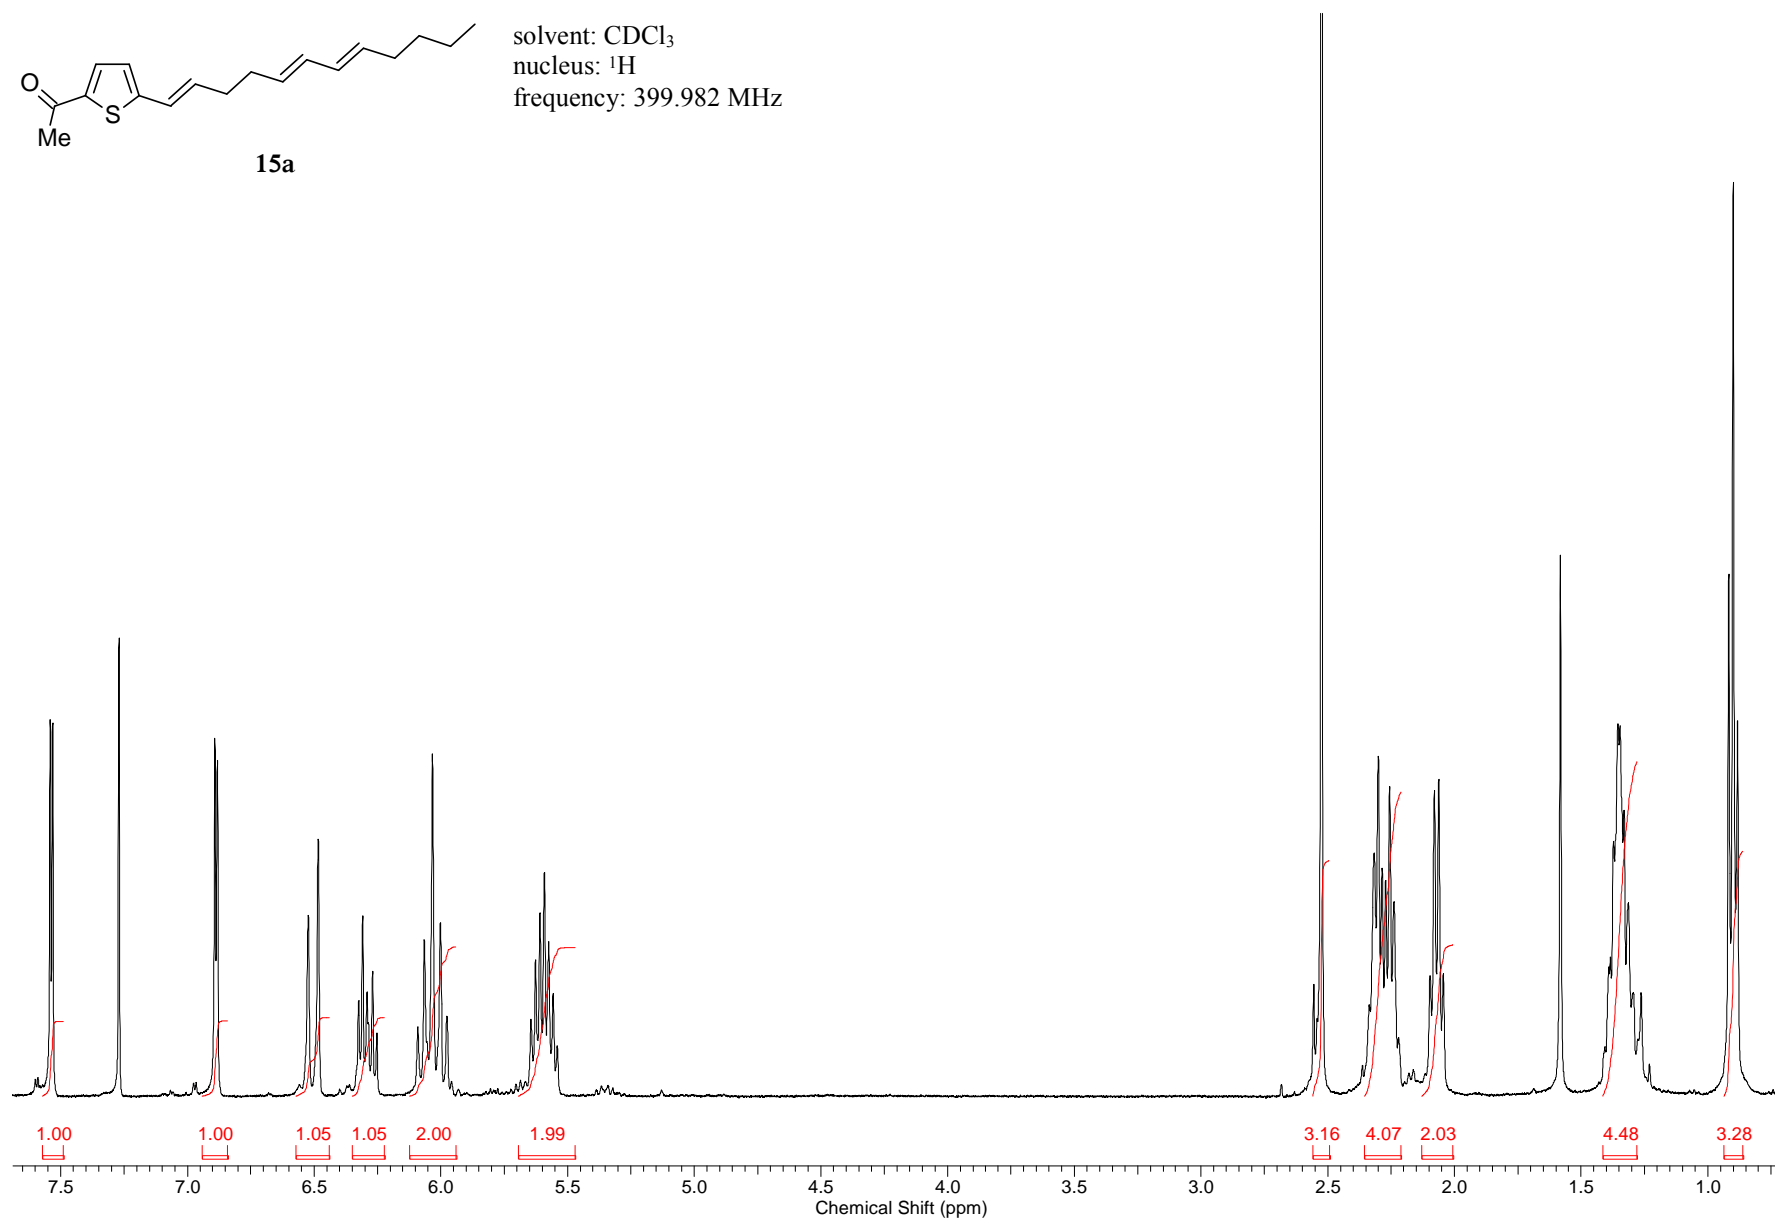

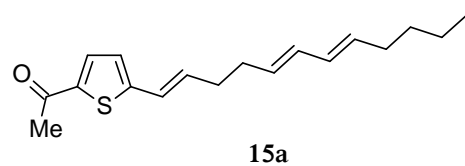

solvent: CDCl<sub>3</sub>  
nucleus: <sup>13</sup>C  
frequency: 100.56 MHz

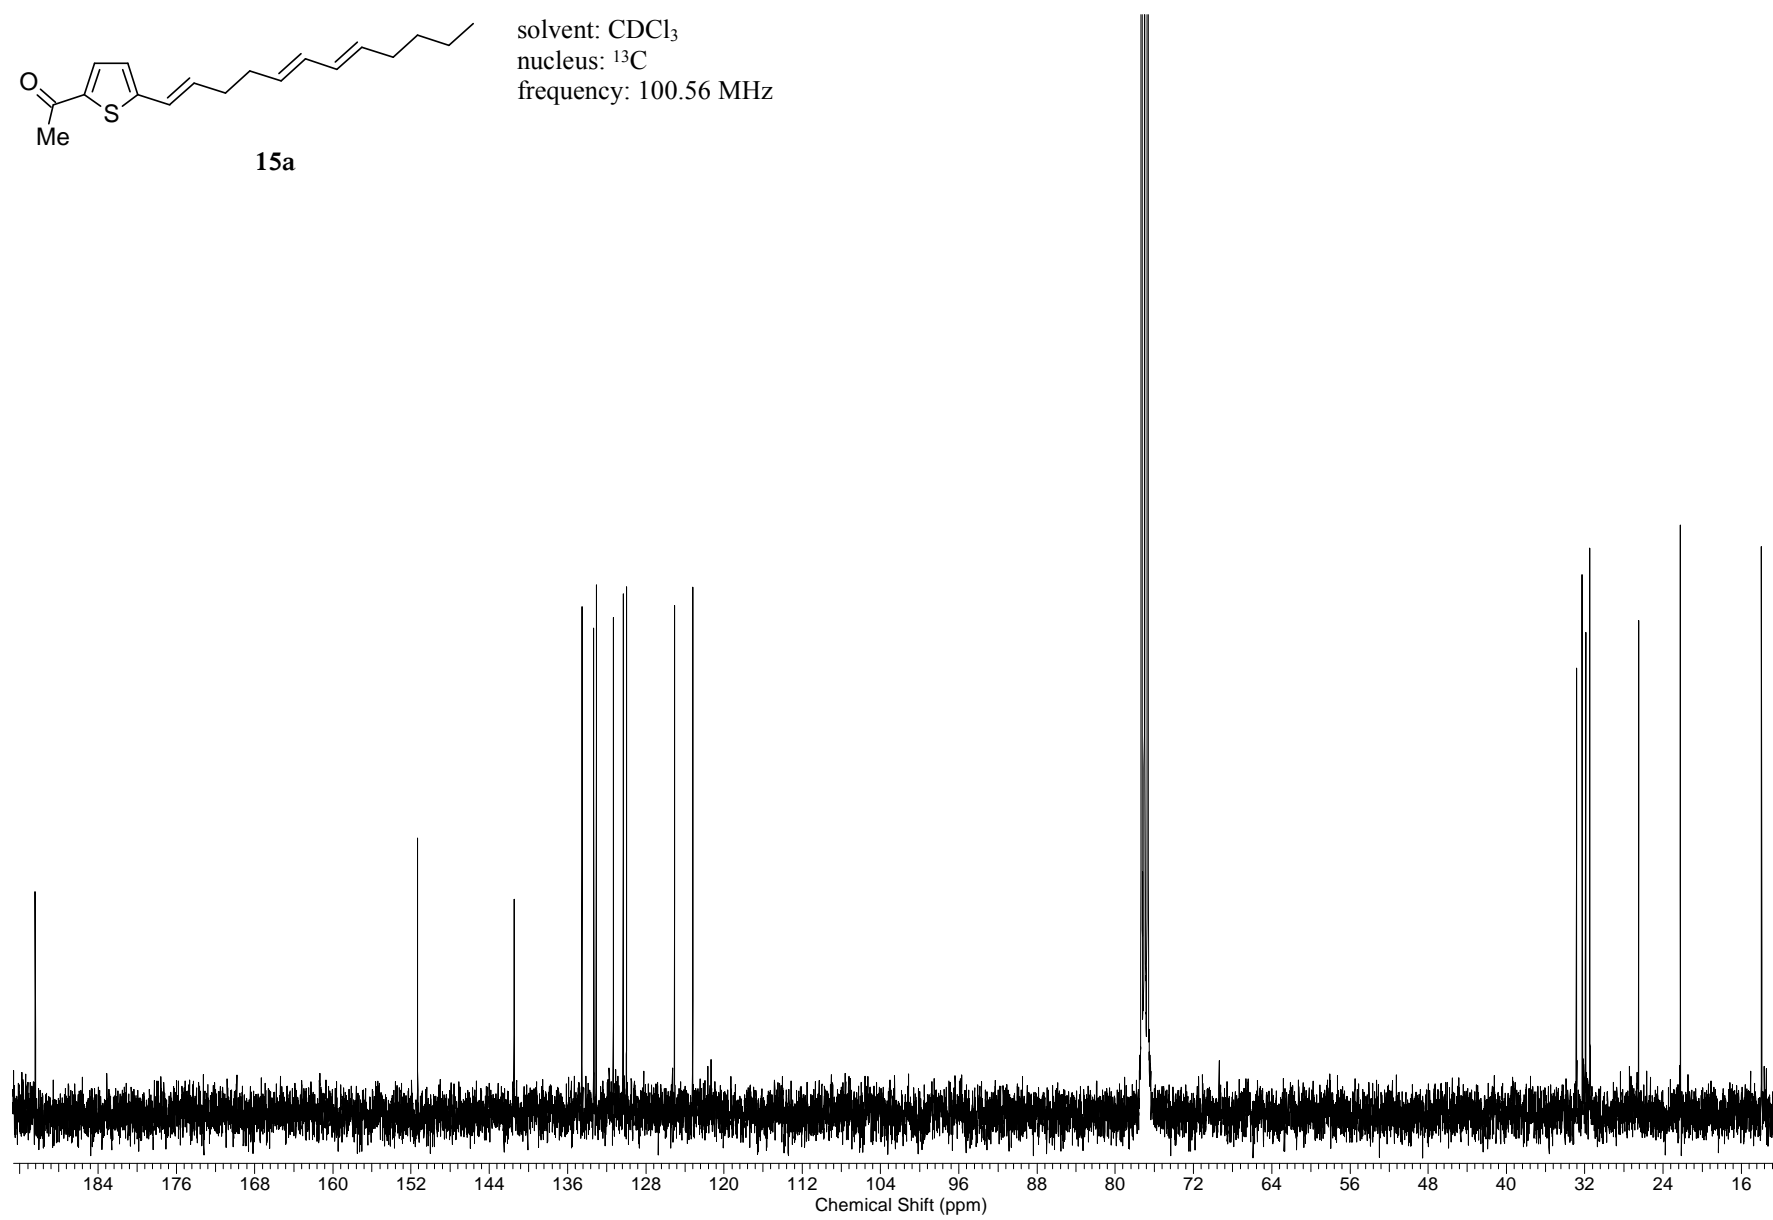

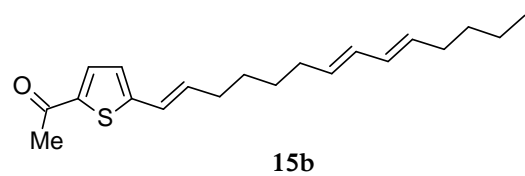

solvent: CDCl<sub>3</sub>  
nucleus: <sup>1</sup>H  
frequency: 399.982 MHz

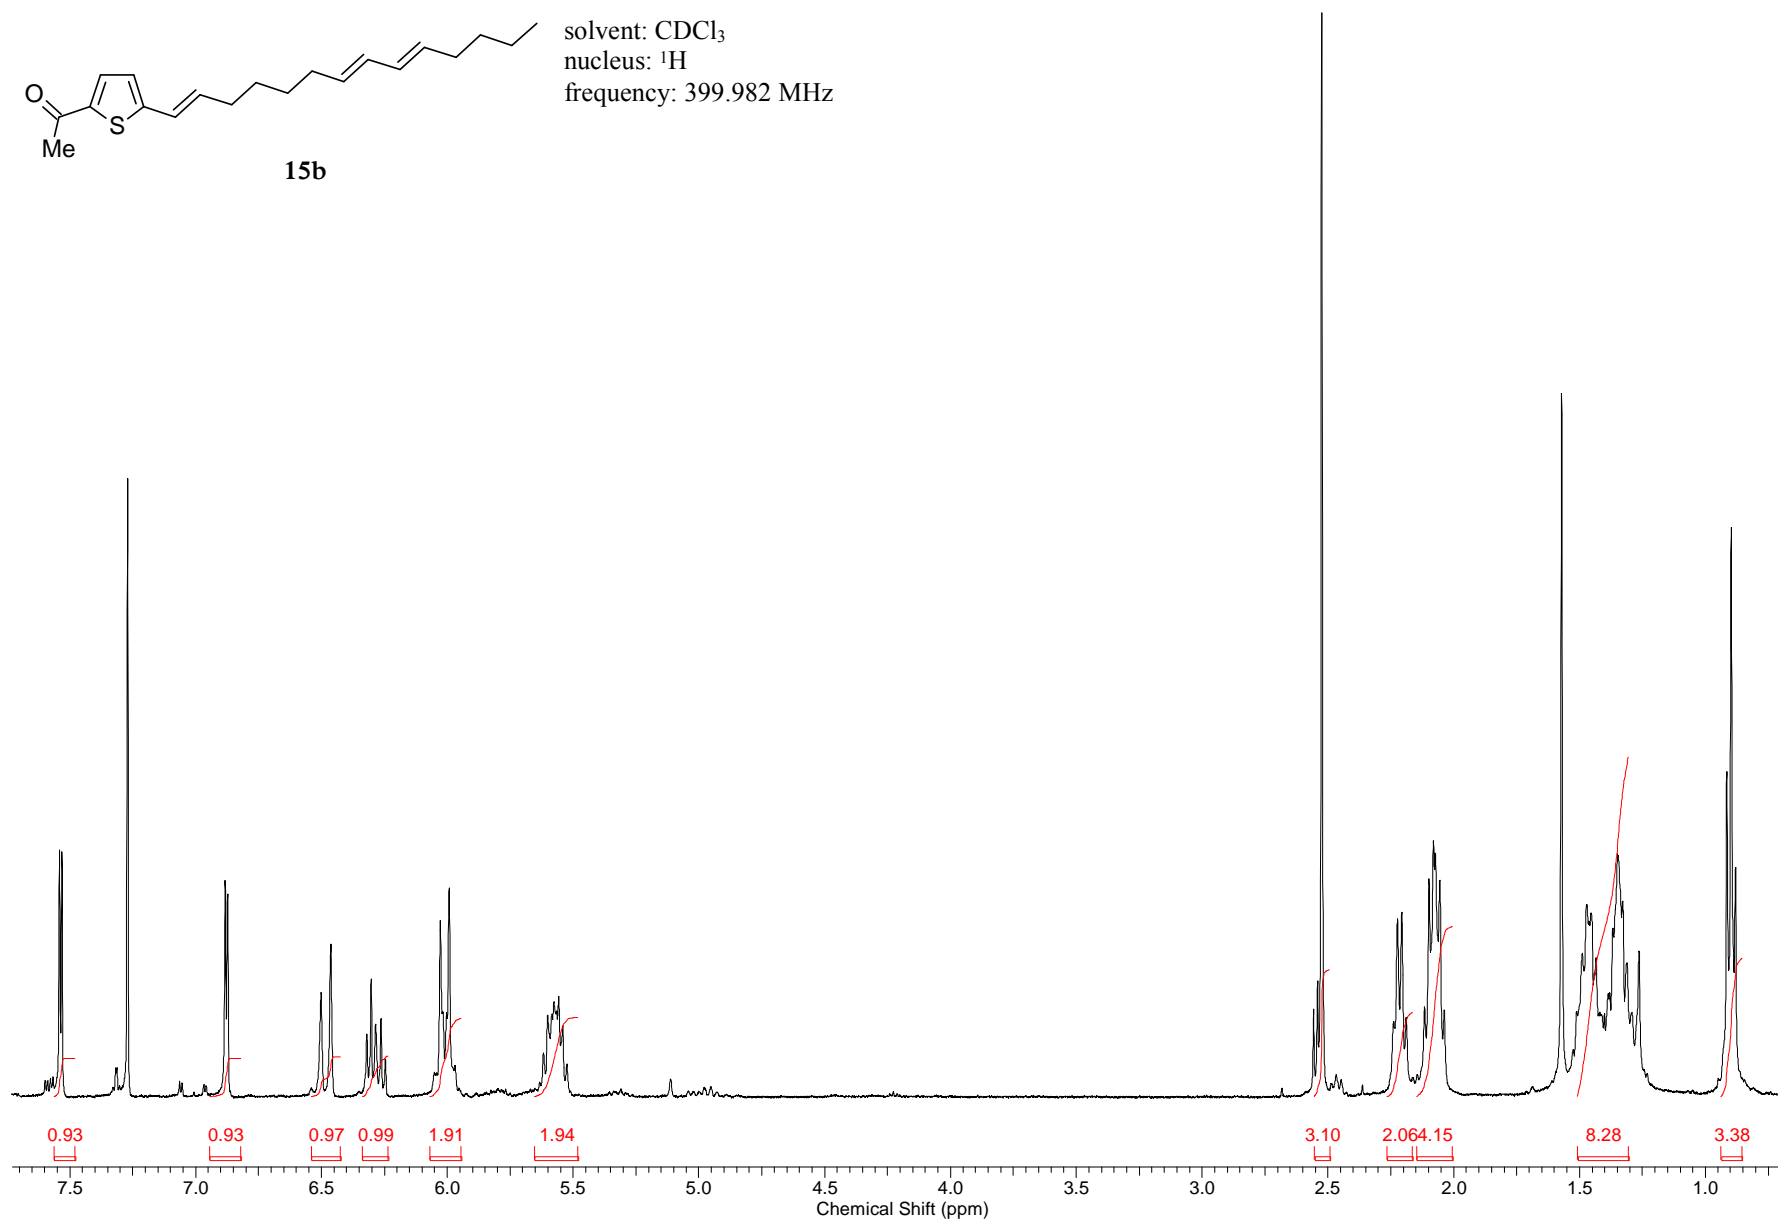

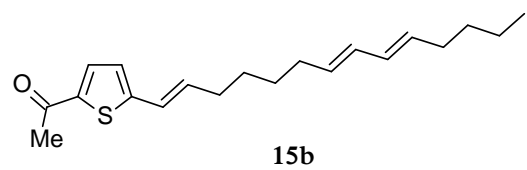

solvent: CDCl<sub>3</sub>  
nucleus: <sup>13</sup>C  
frequency: 100.56 MHz

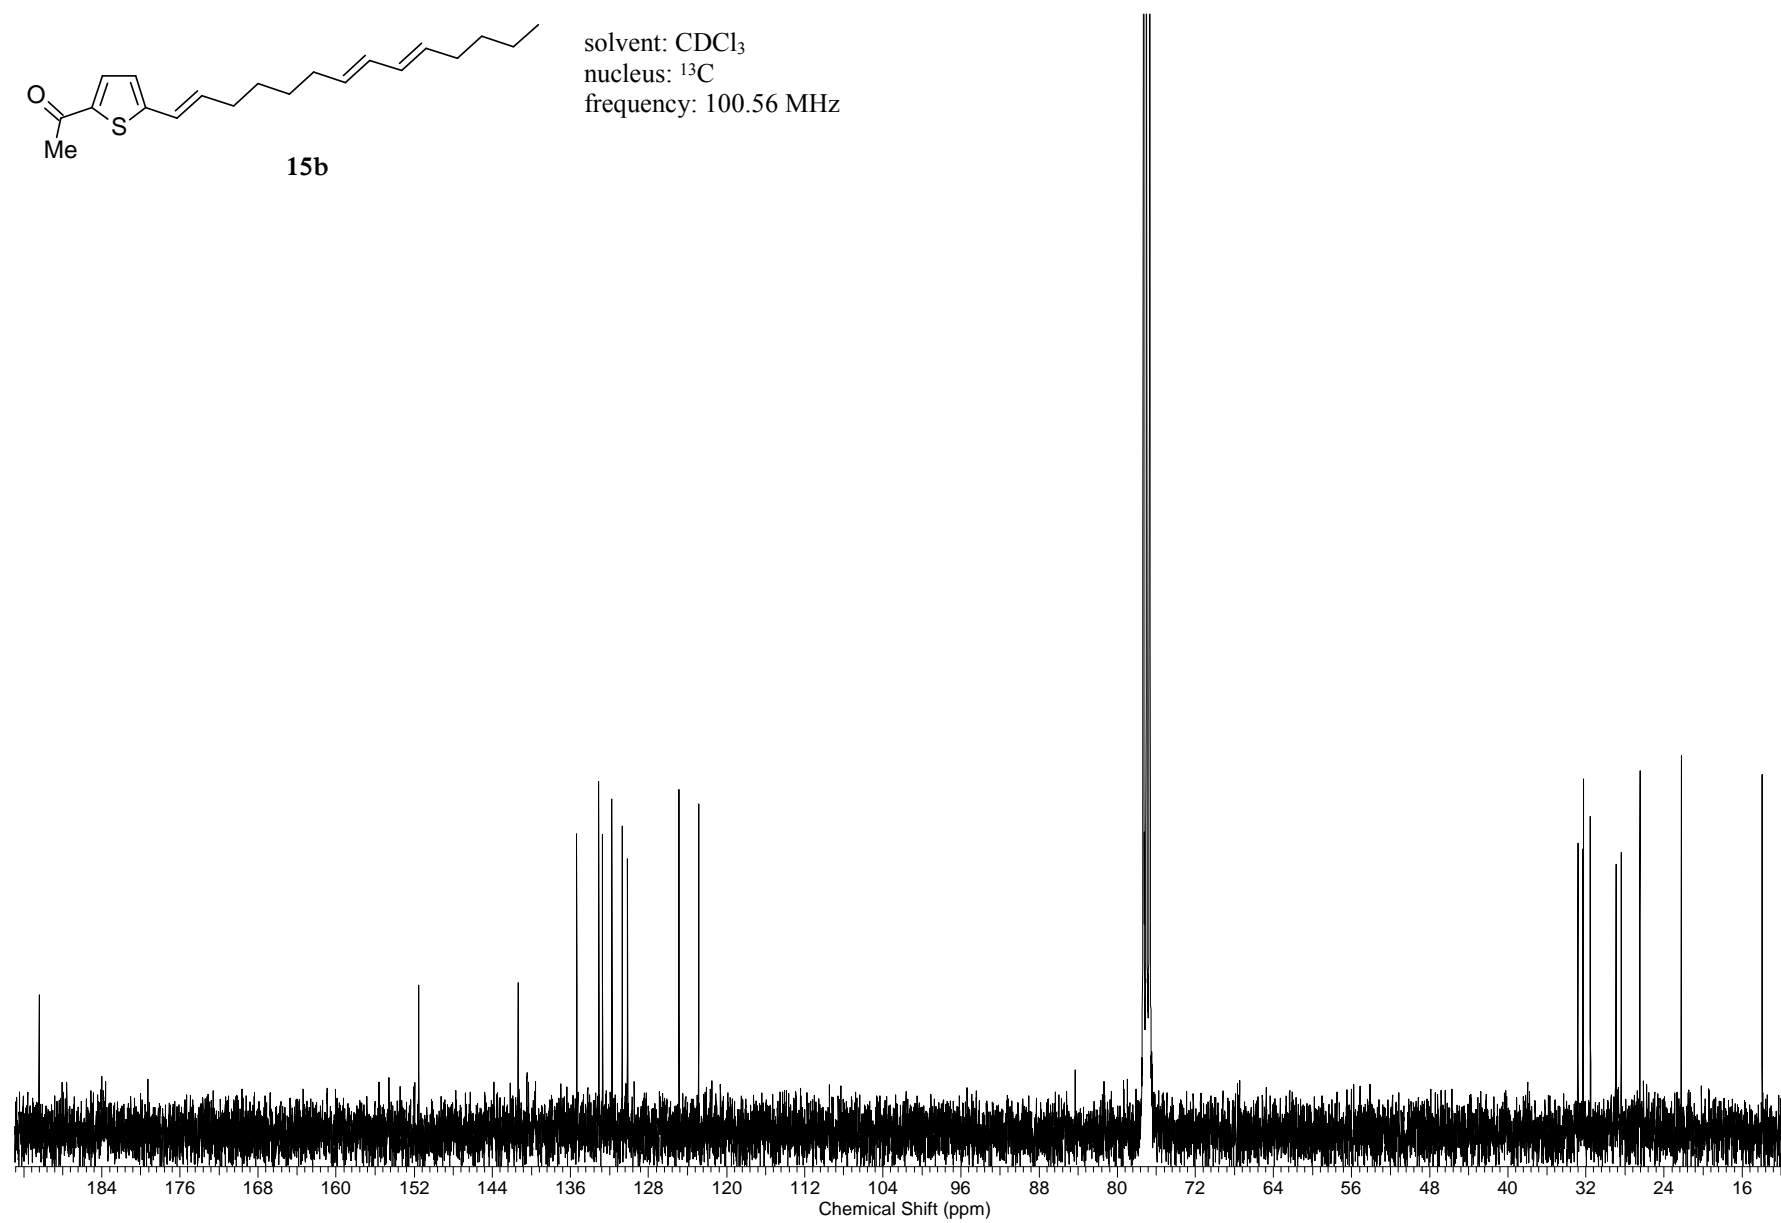

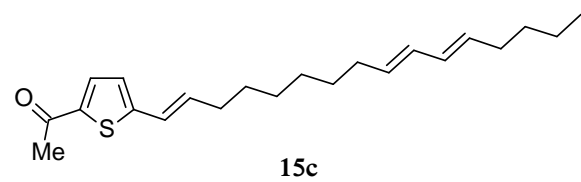

solvent: CDCl<sub>3</sub>  
nucleus: <sup>1</sup>H  
frequency: 399.982 MHz

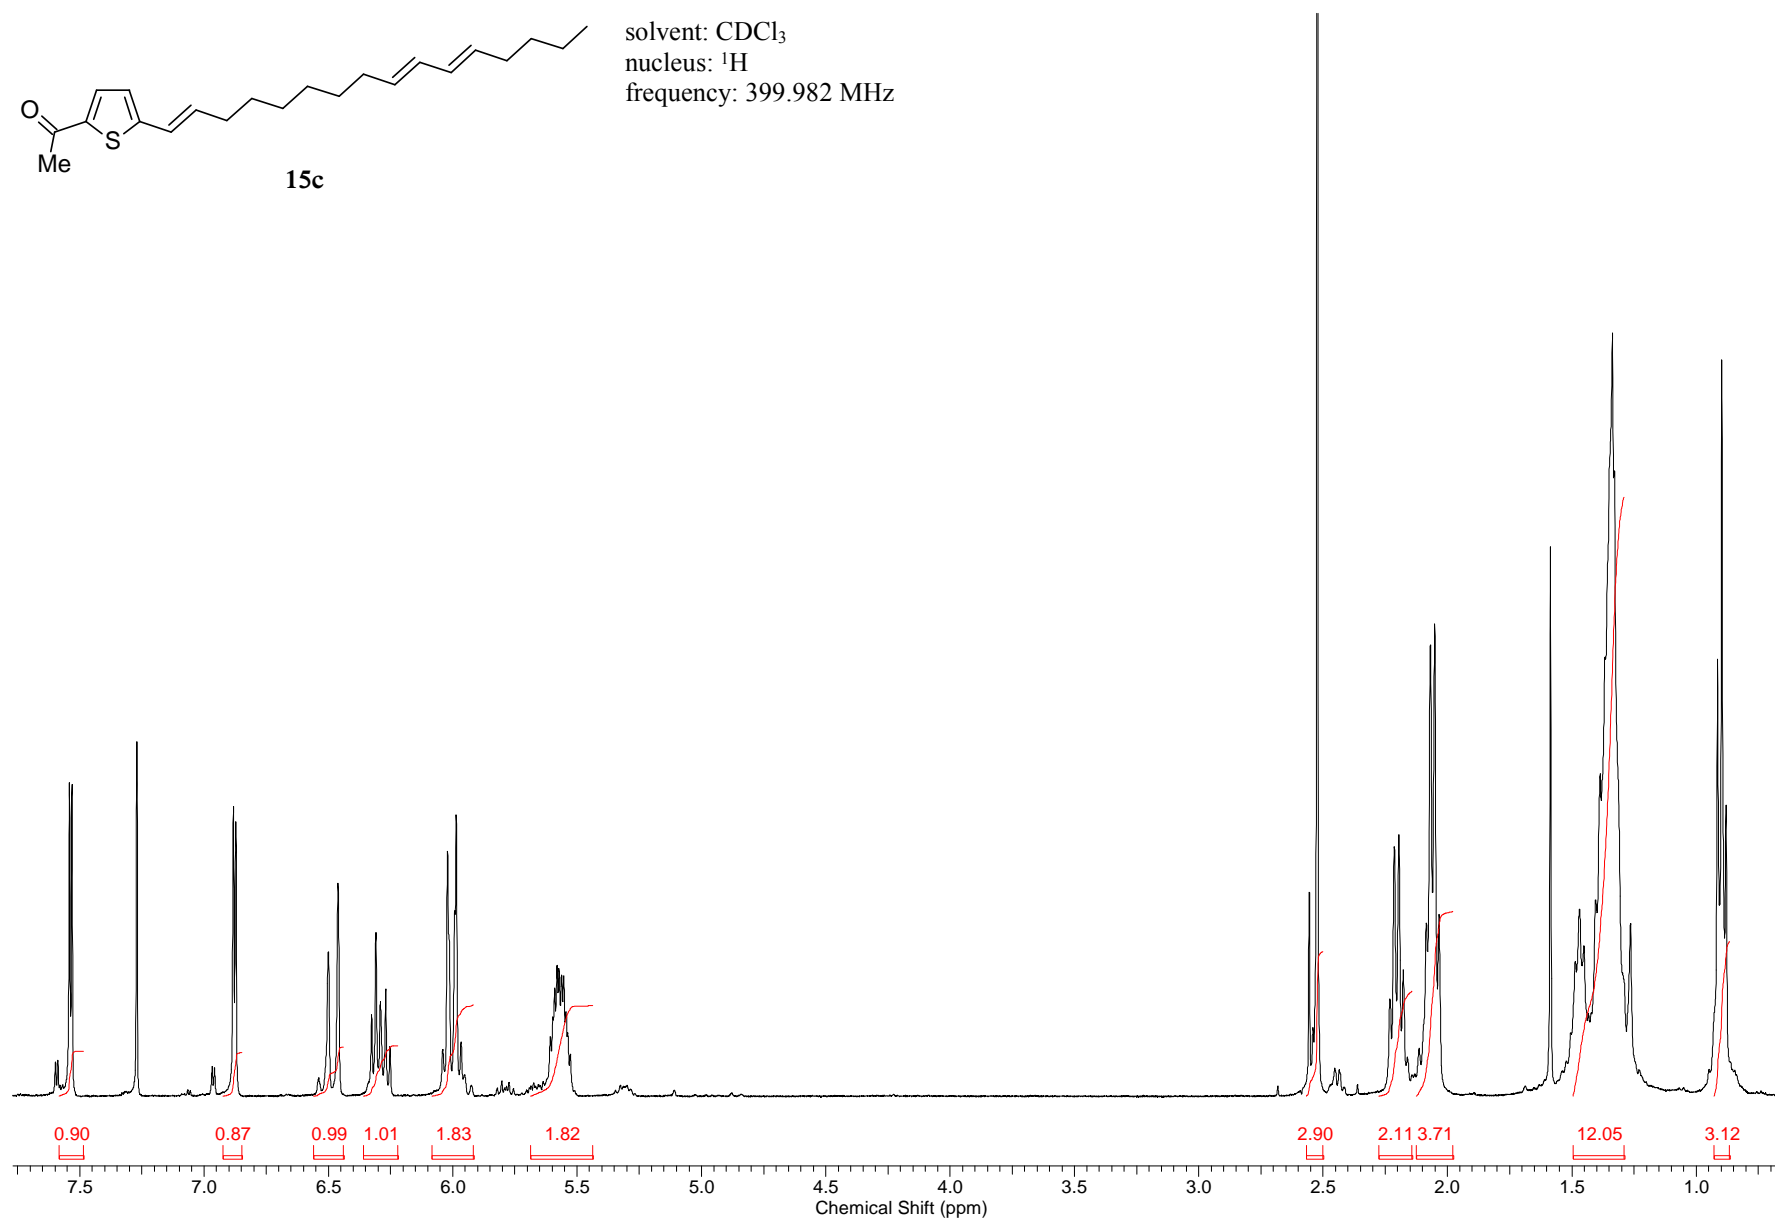

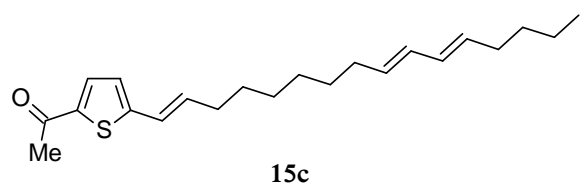

solvent: CDCl<sub>3</sub>  
nucleus: <sup>13</sup>C  
frequency: 100.56 MHz

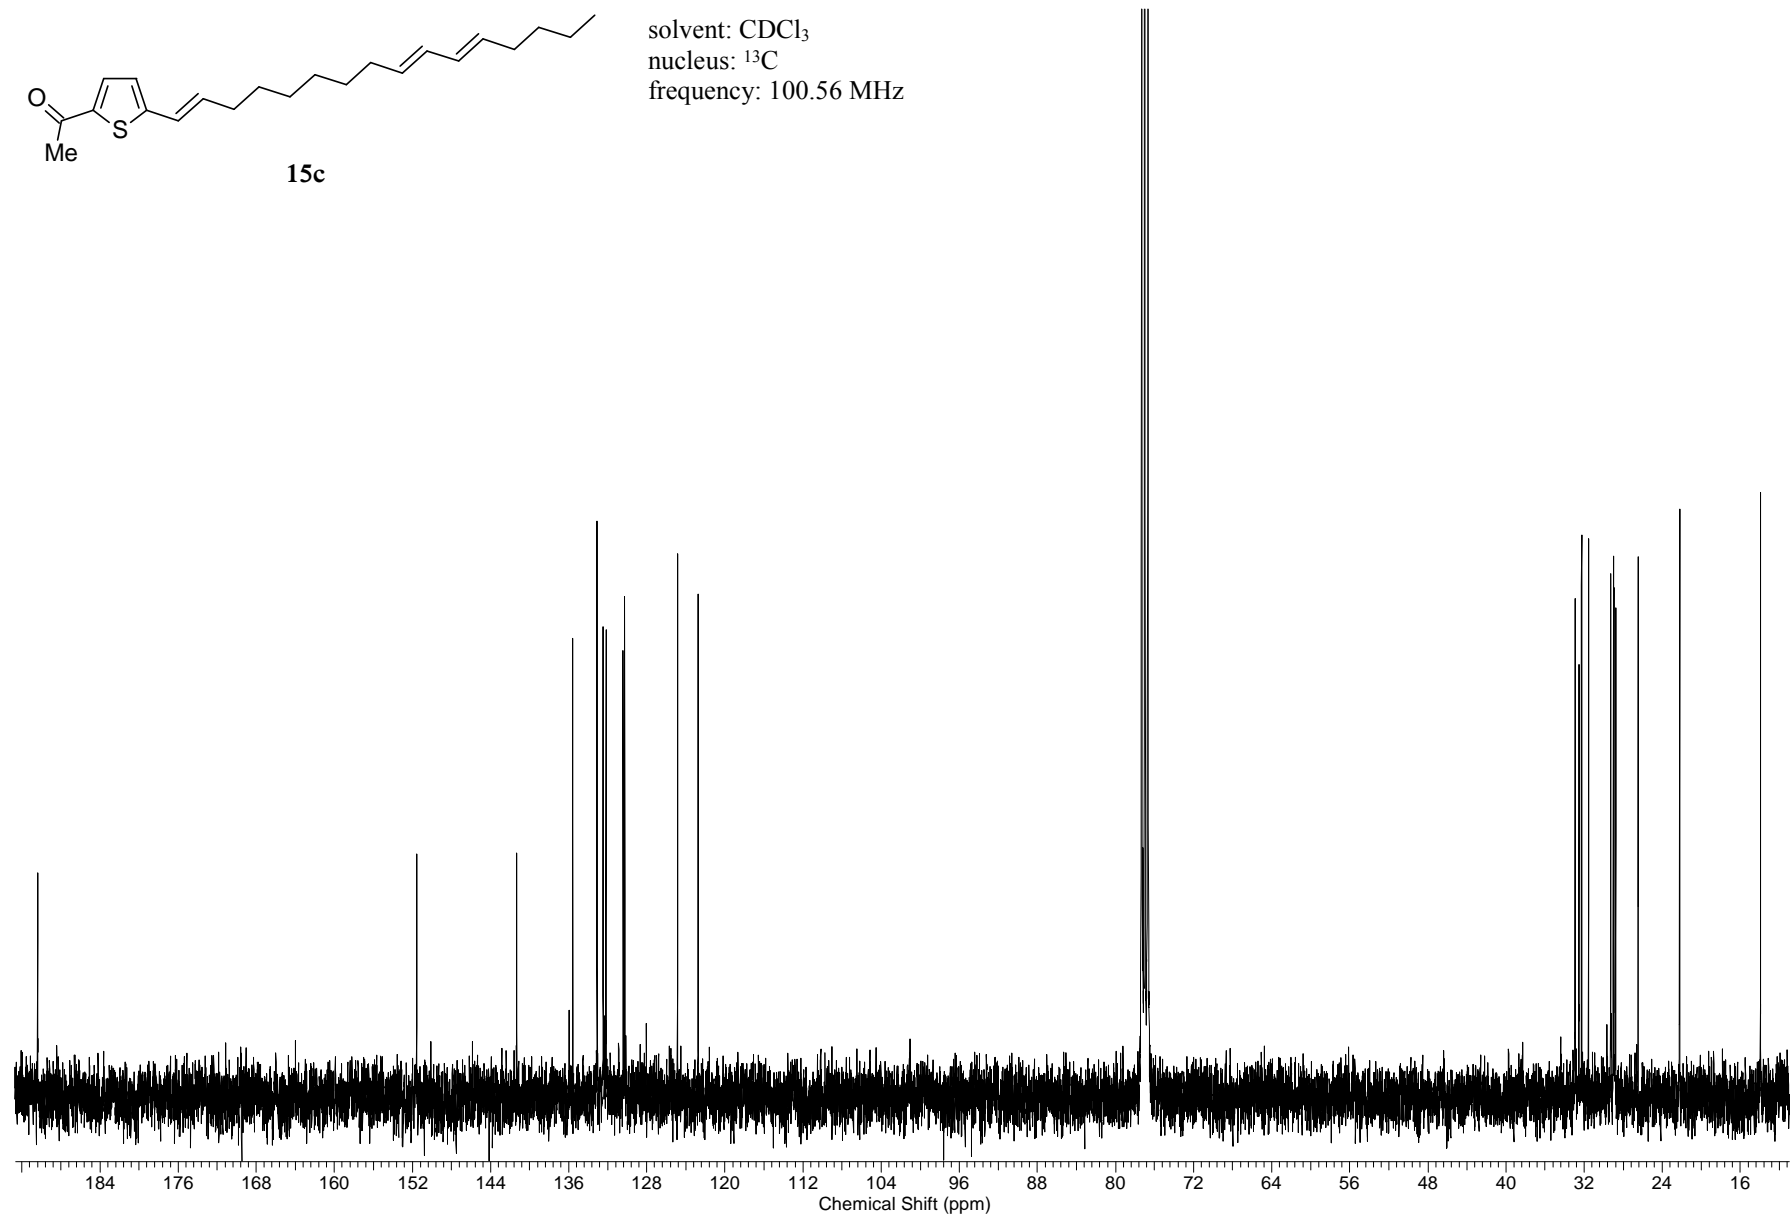



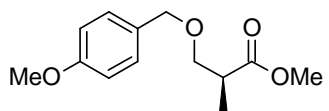

25

solvent: CDCl<sub>3</sub>  
nucleus: <sup>1</sup>H  
frequency: 500.130 MHz

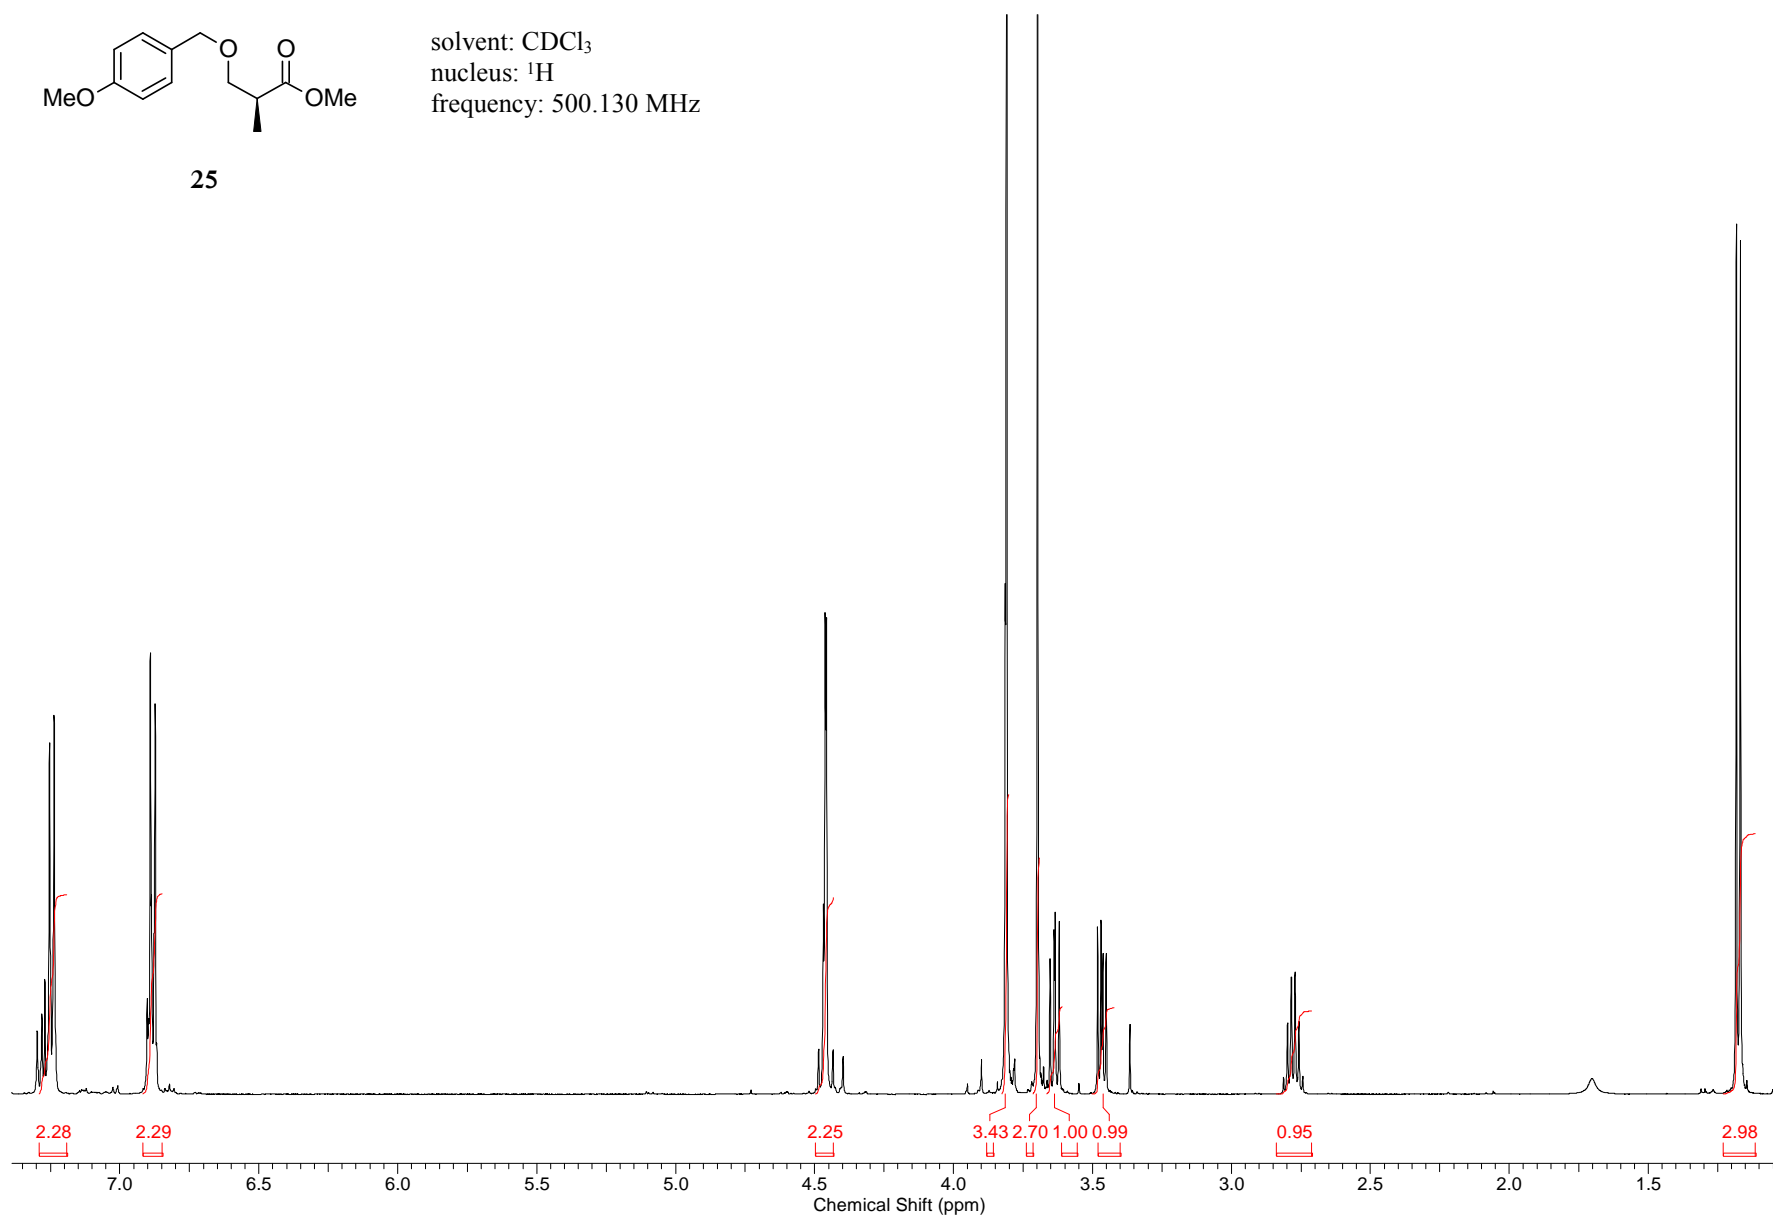

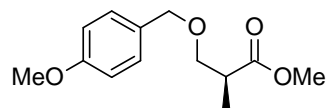

25

solvent: CDCl<sub>3</sub>

nucleus: <sup>13</sup>C

frequency: 125.76 MHz

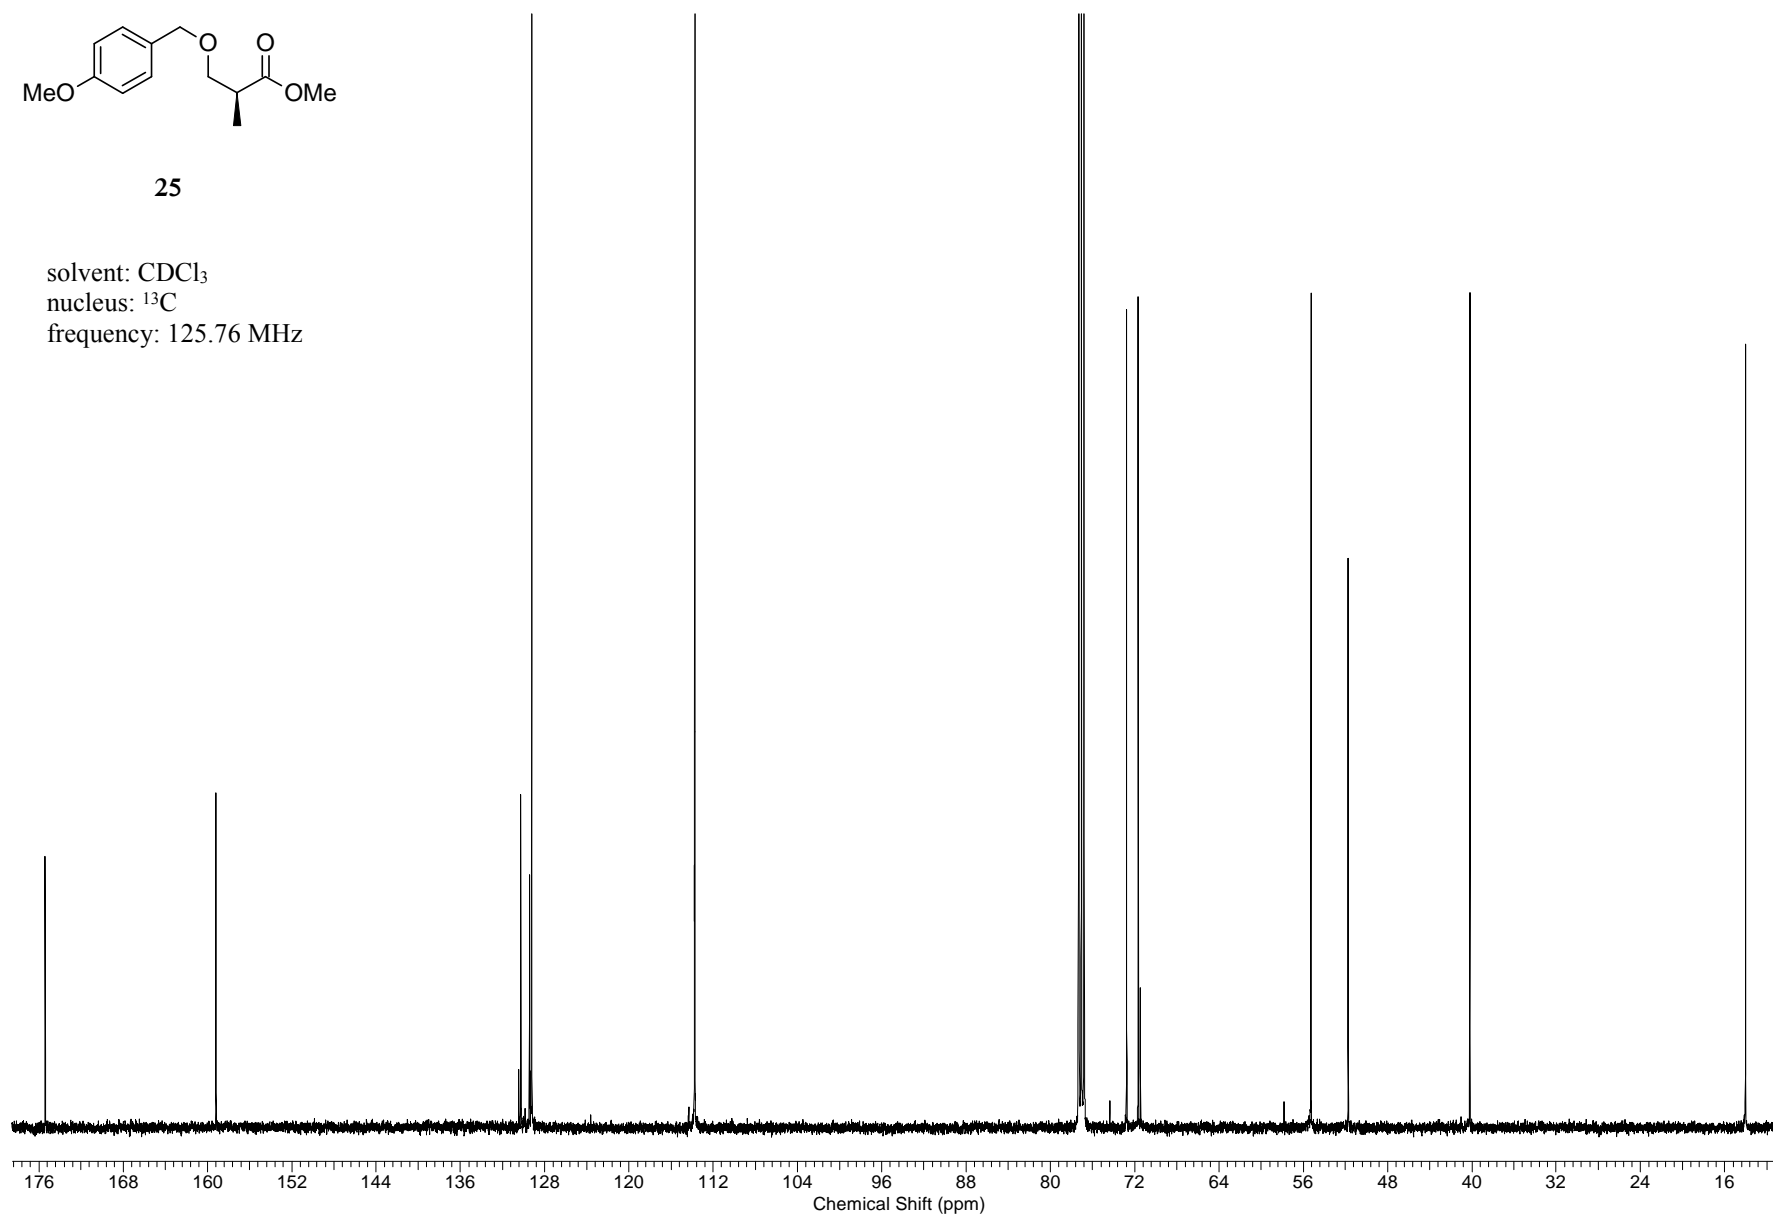

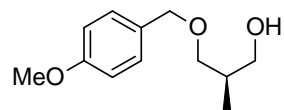

26

solvent: CDCl<sub>3</sub>  
nucleus: <sup>1</sup>H  
frequency: 300.132 MHz

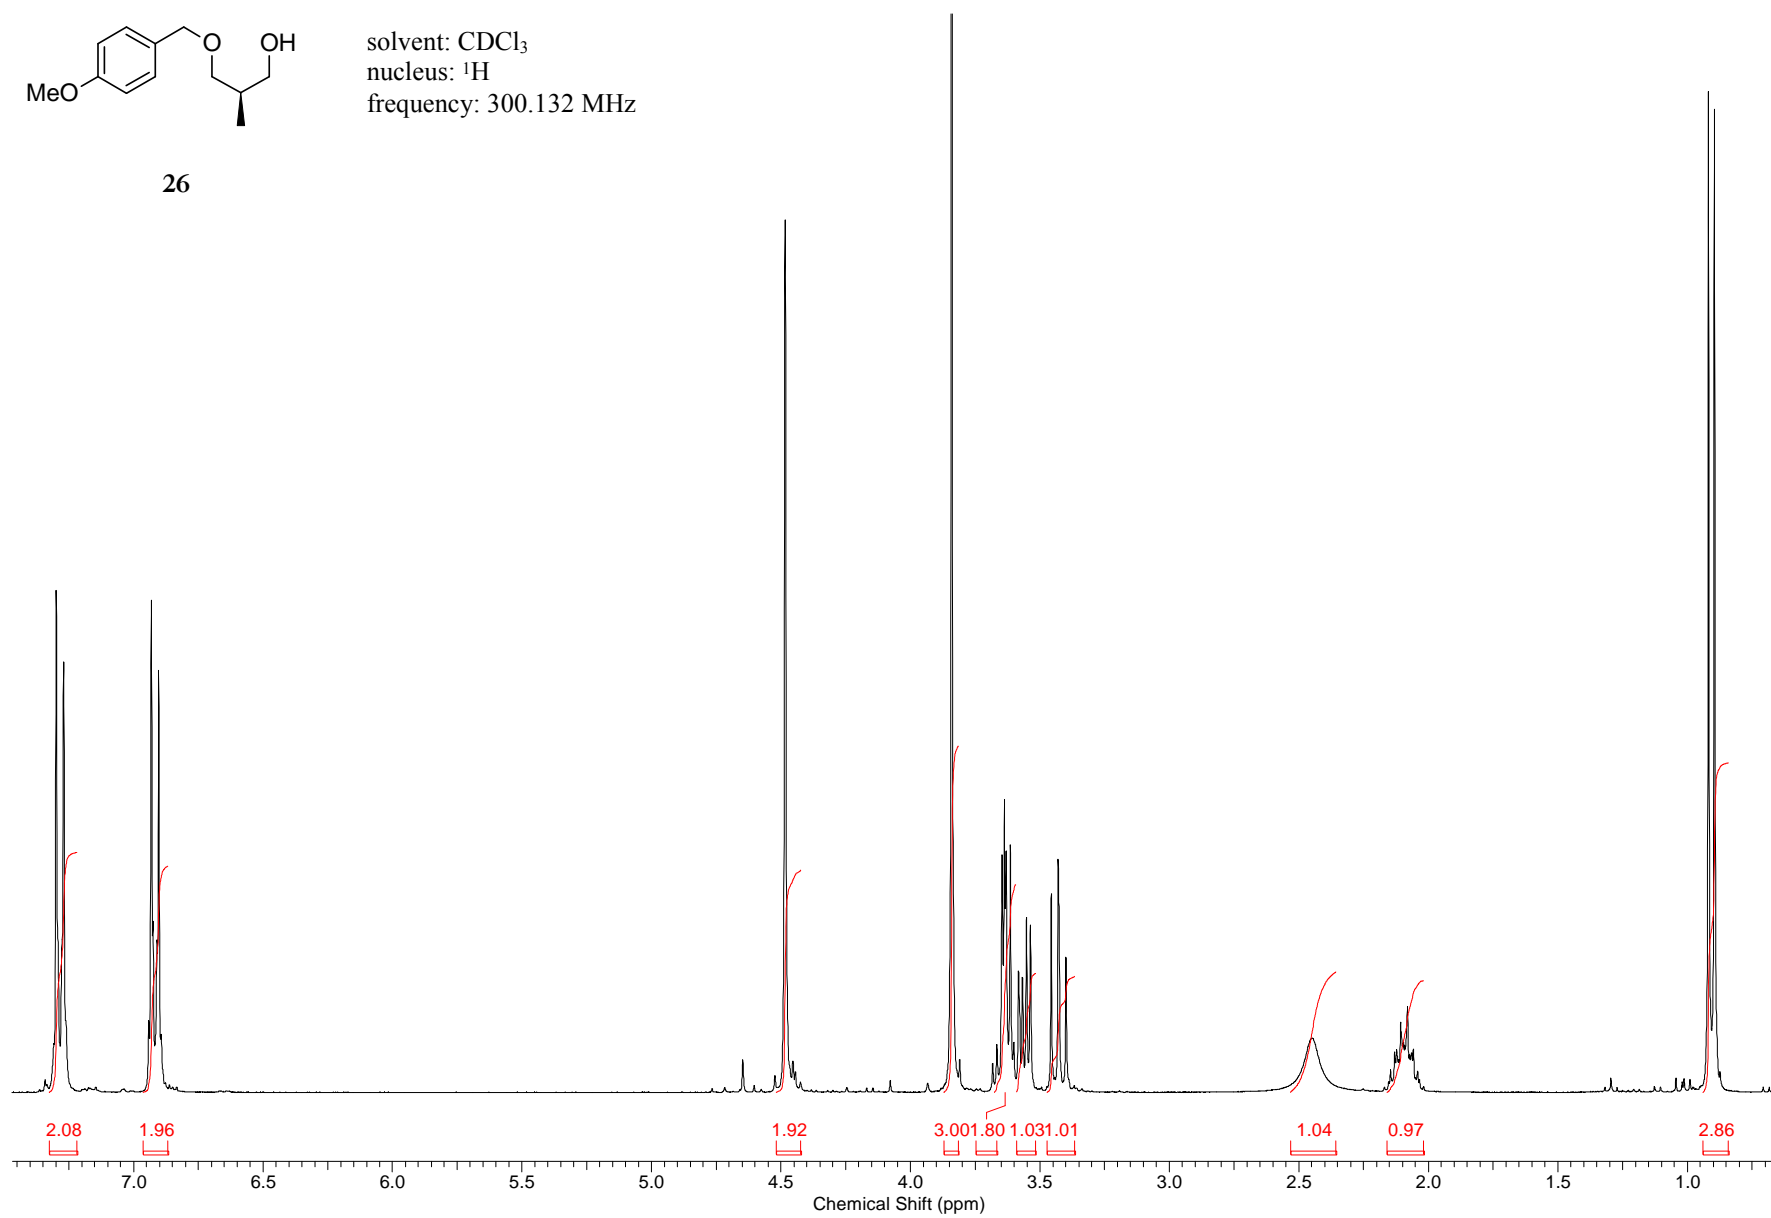

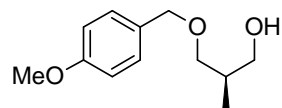

26

solvent: CDCl<sub>3</sub>

nucleus: <sup>13</sup>C

frequency: 75.48 MHz

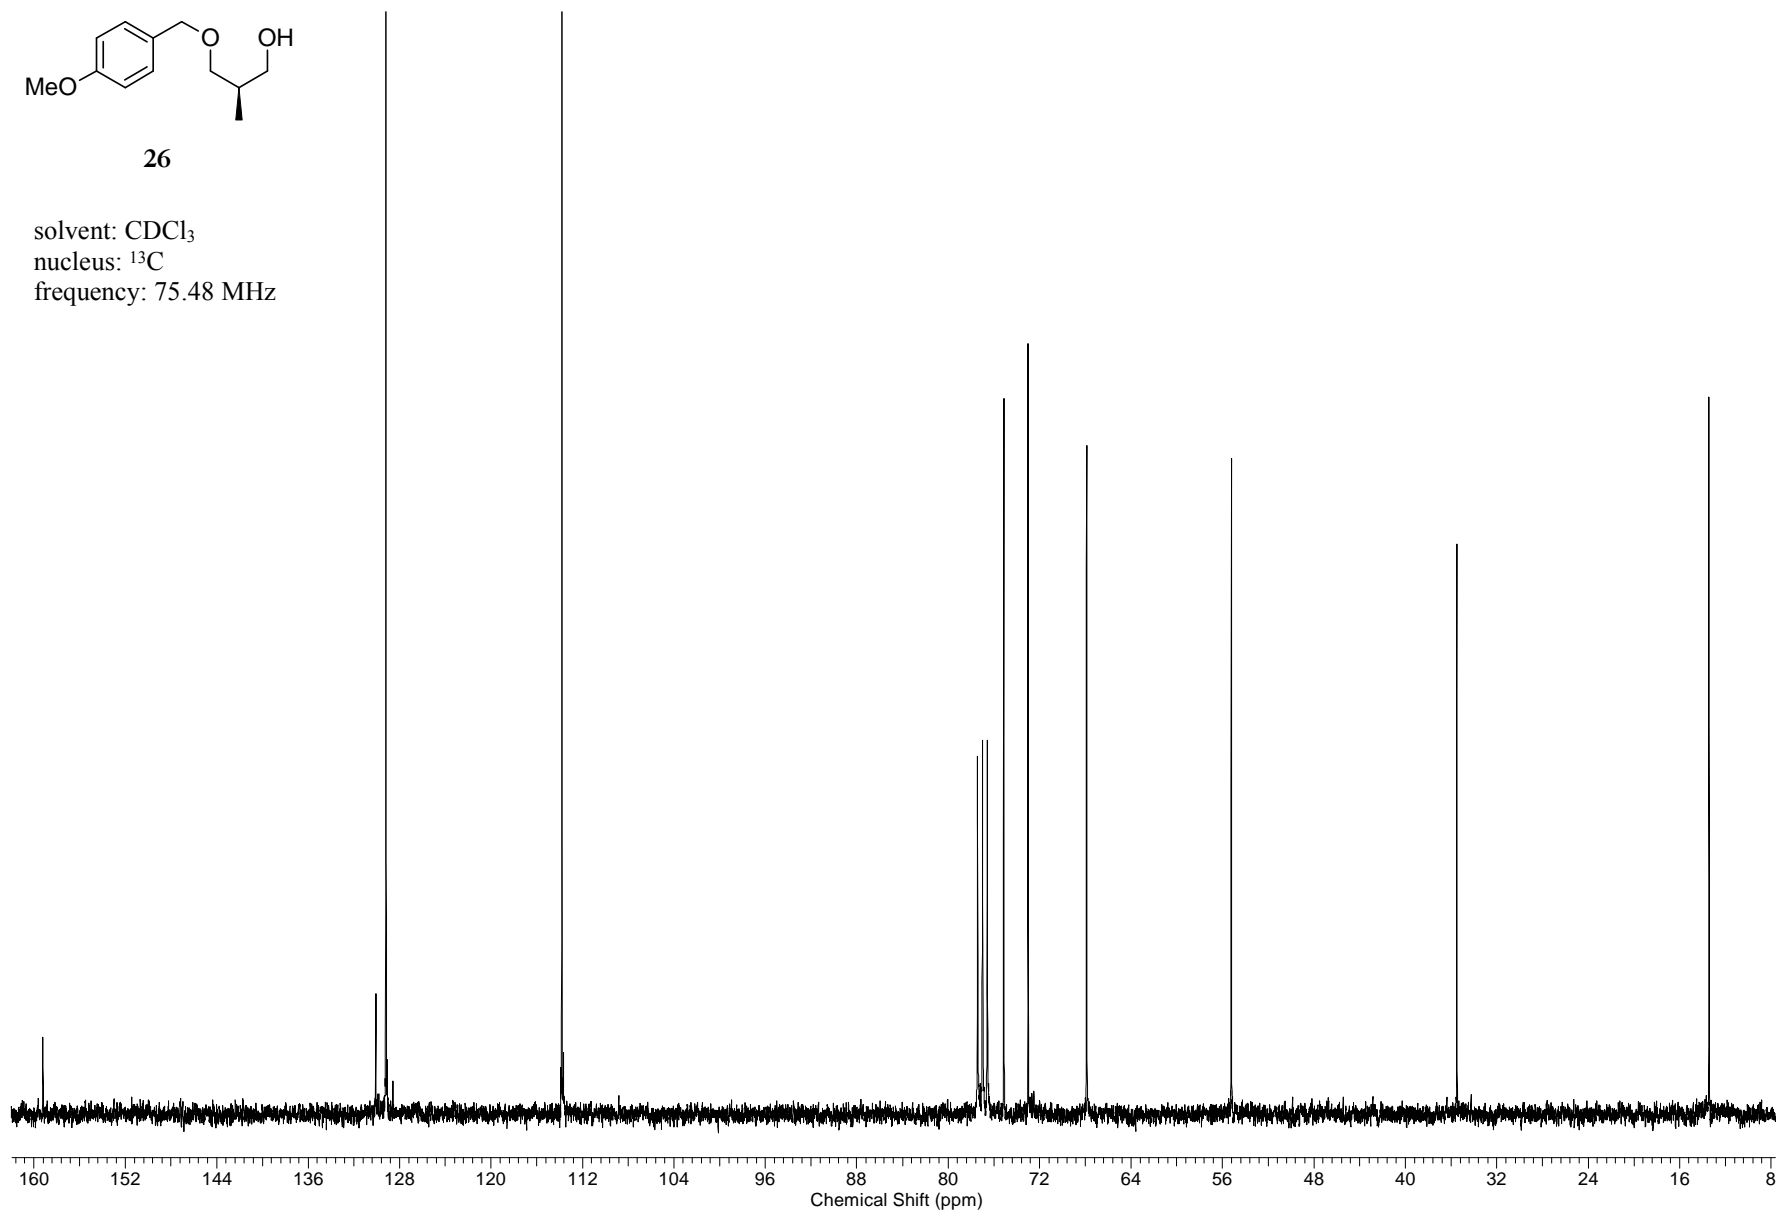

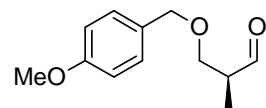

27

solvent: CDCl<sub>3</sub>  
nucleus: <sup>1</sup>H  
frequency: 300.132 MHz

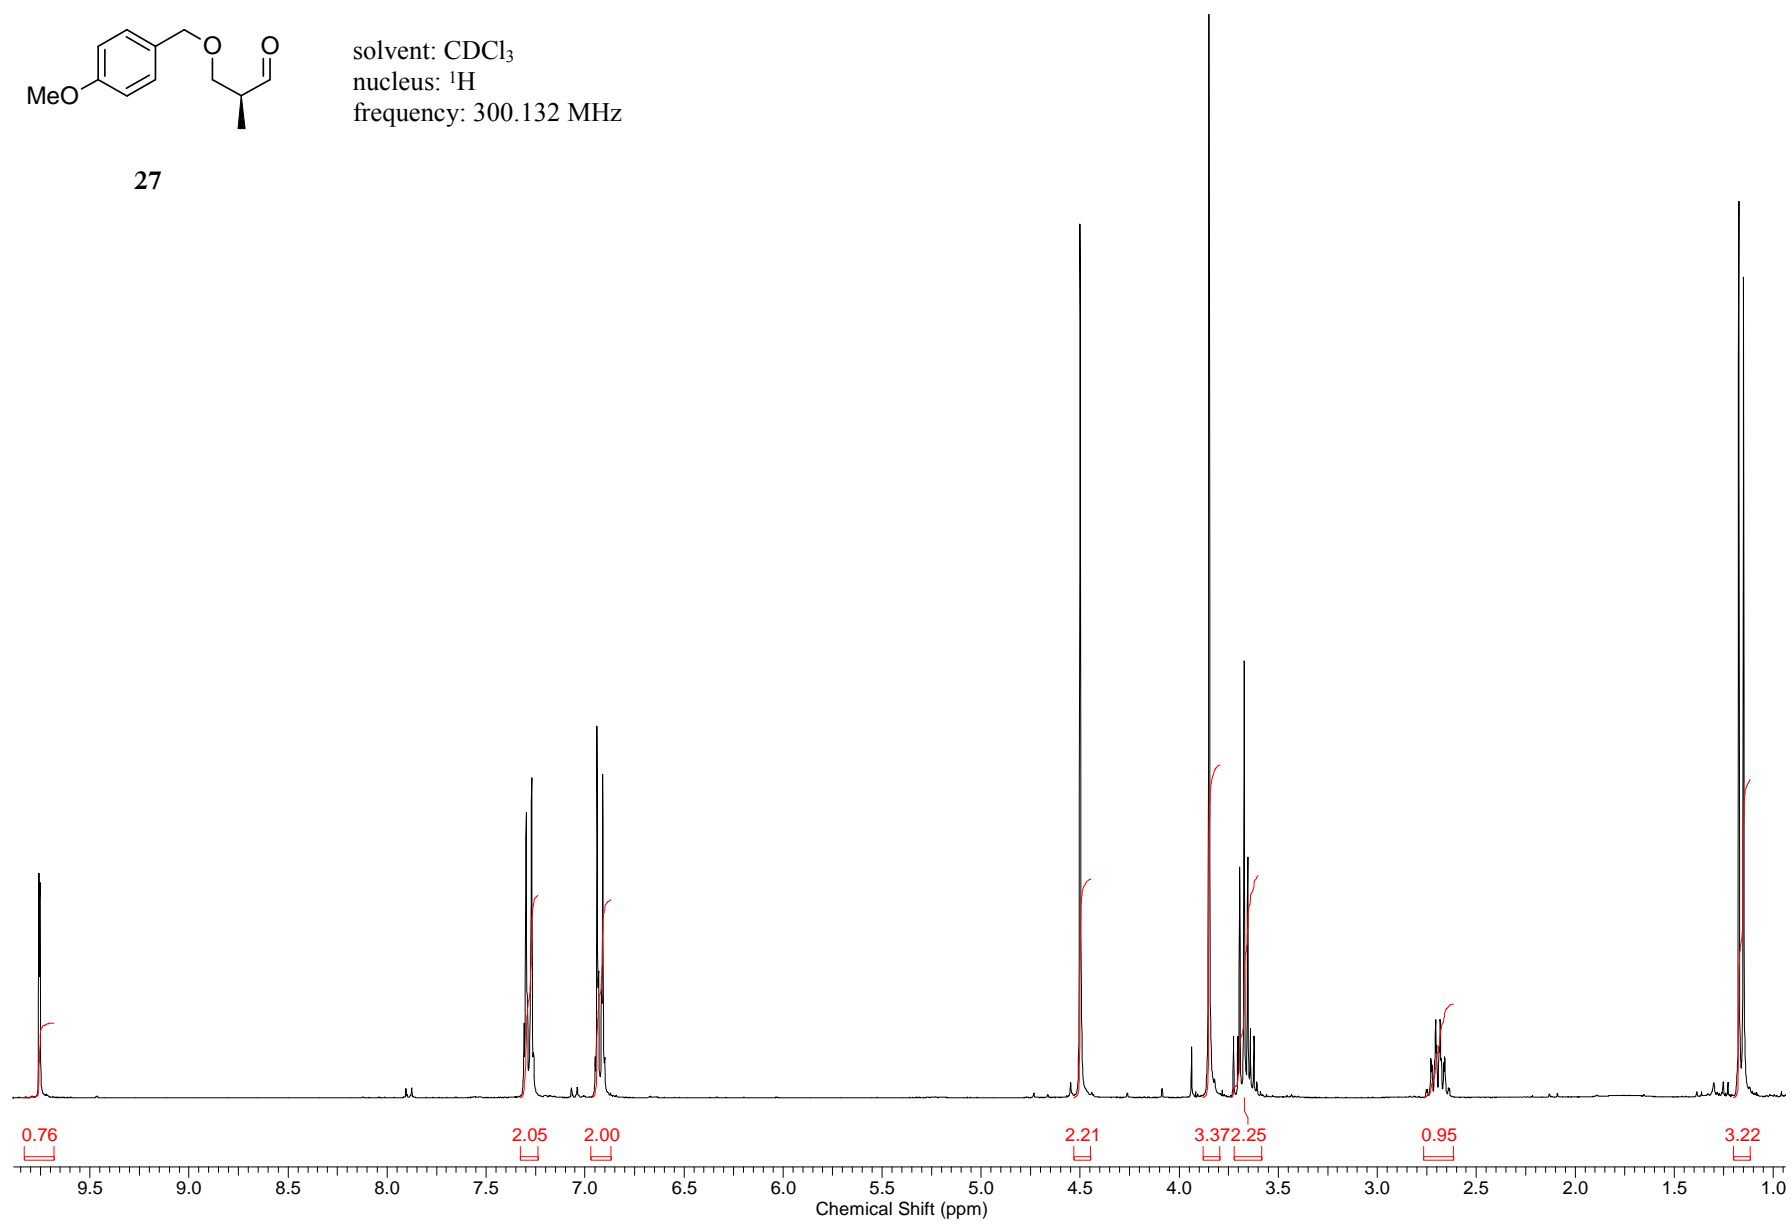

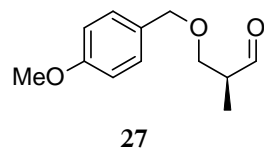

solvent: CDCl<sub>3</sub>  
nucleus: <sup>13</sup>C  
frequency: 75.48 MHz

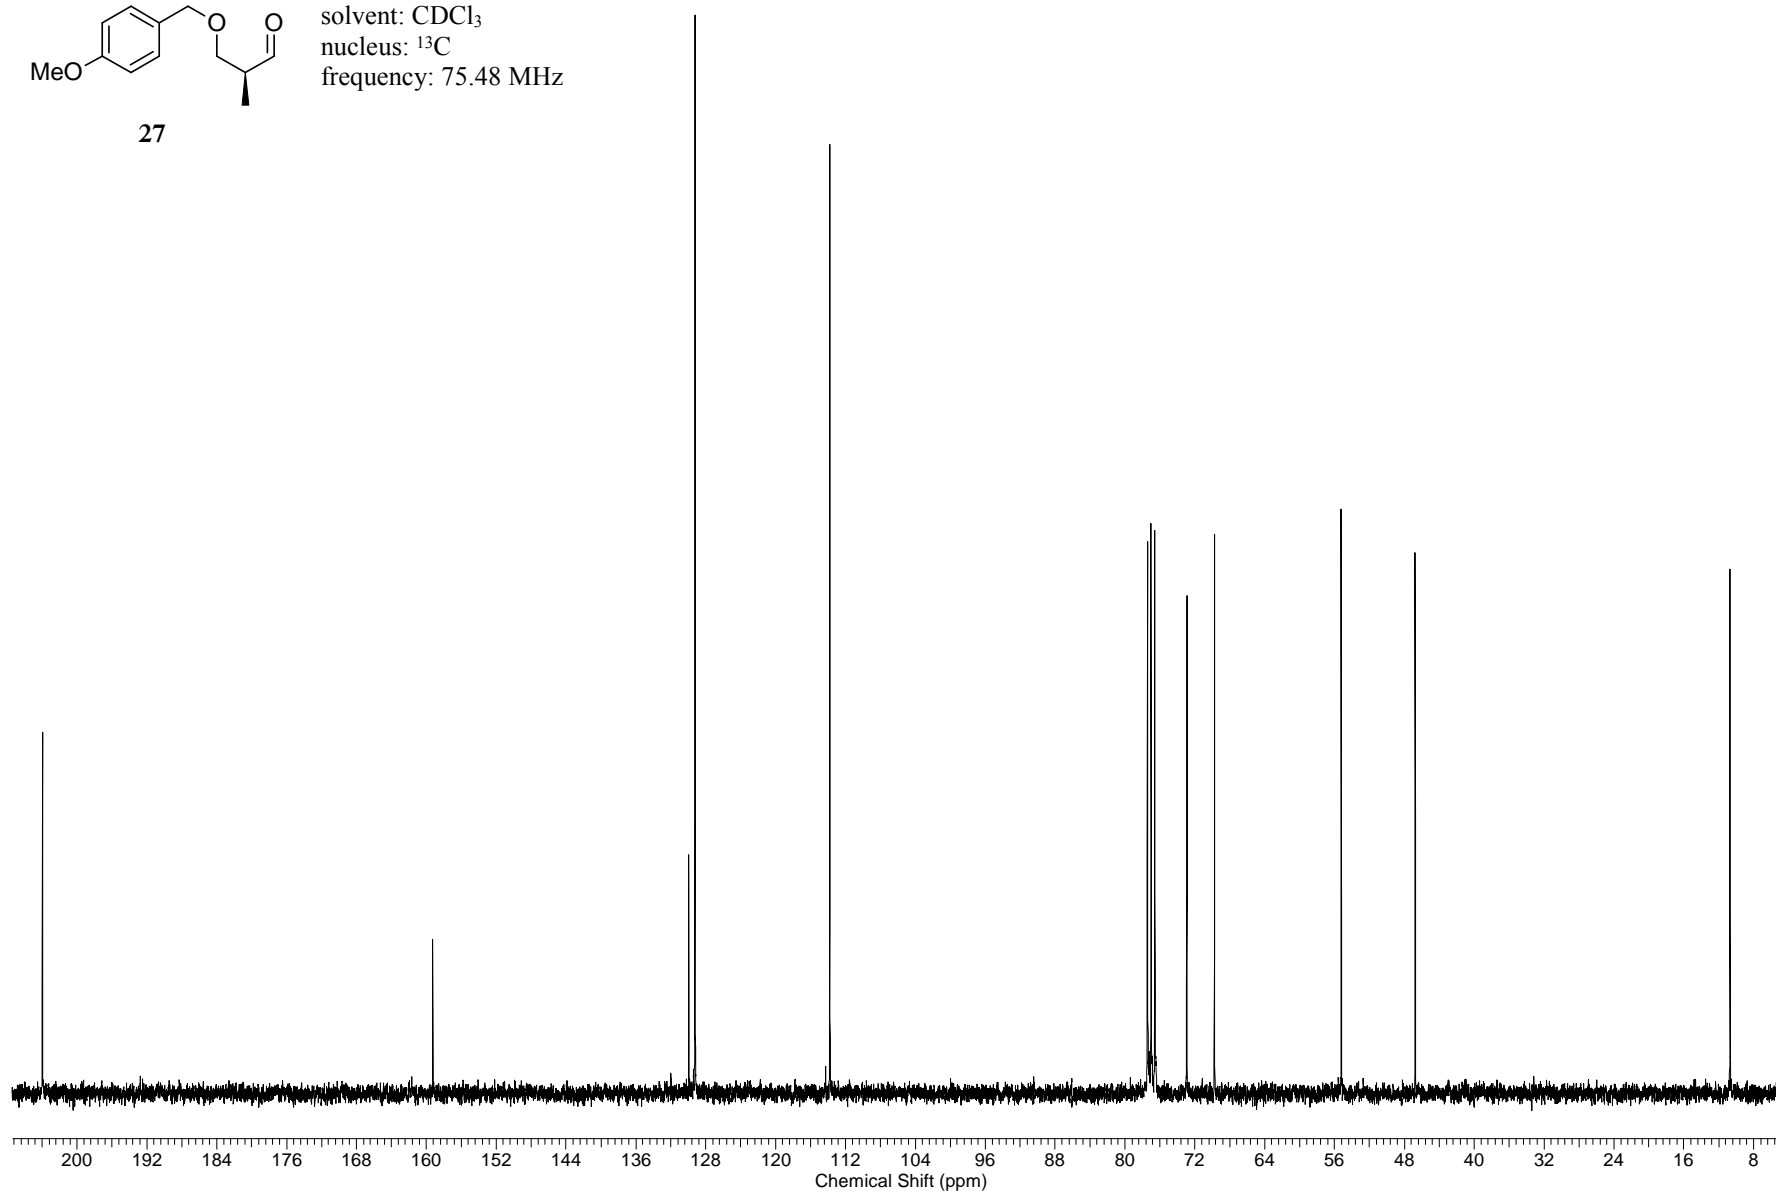

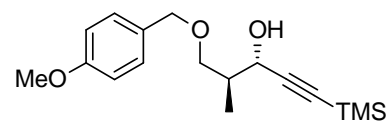

17

solvent: CDCl<sub>3</sub>  
nucleus: <sup>1</sup>H  
frequency: 300.132 MHz

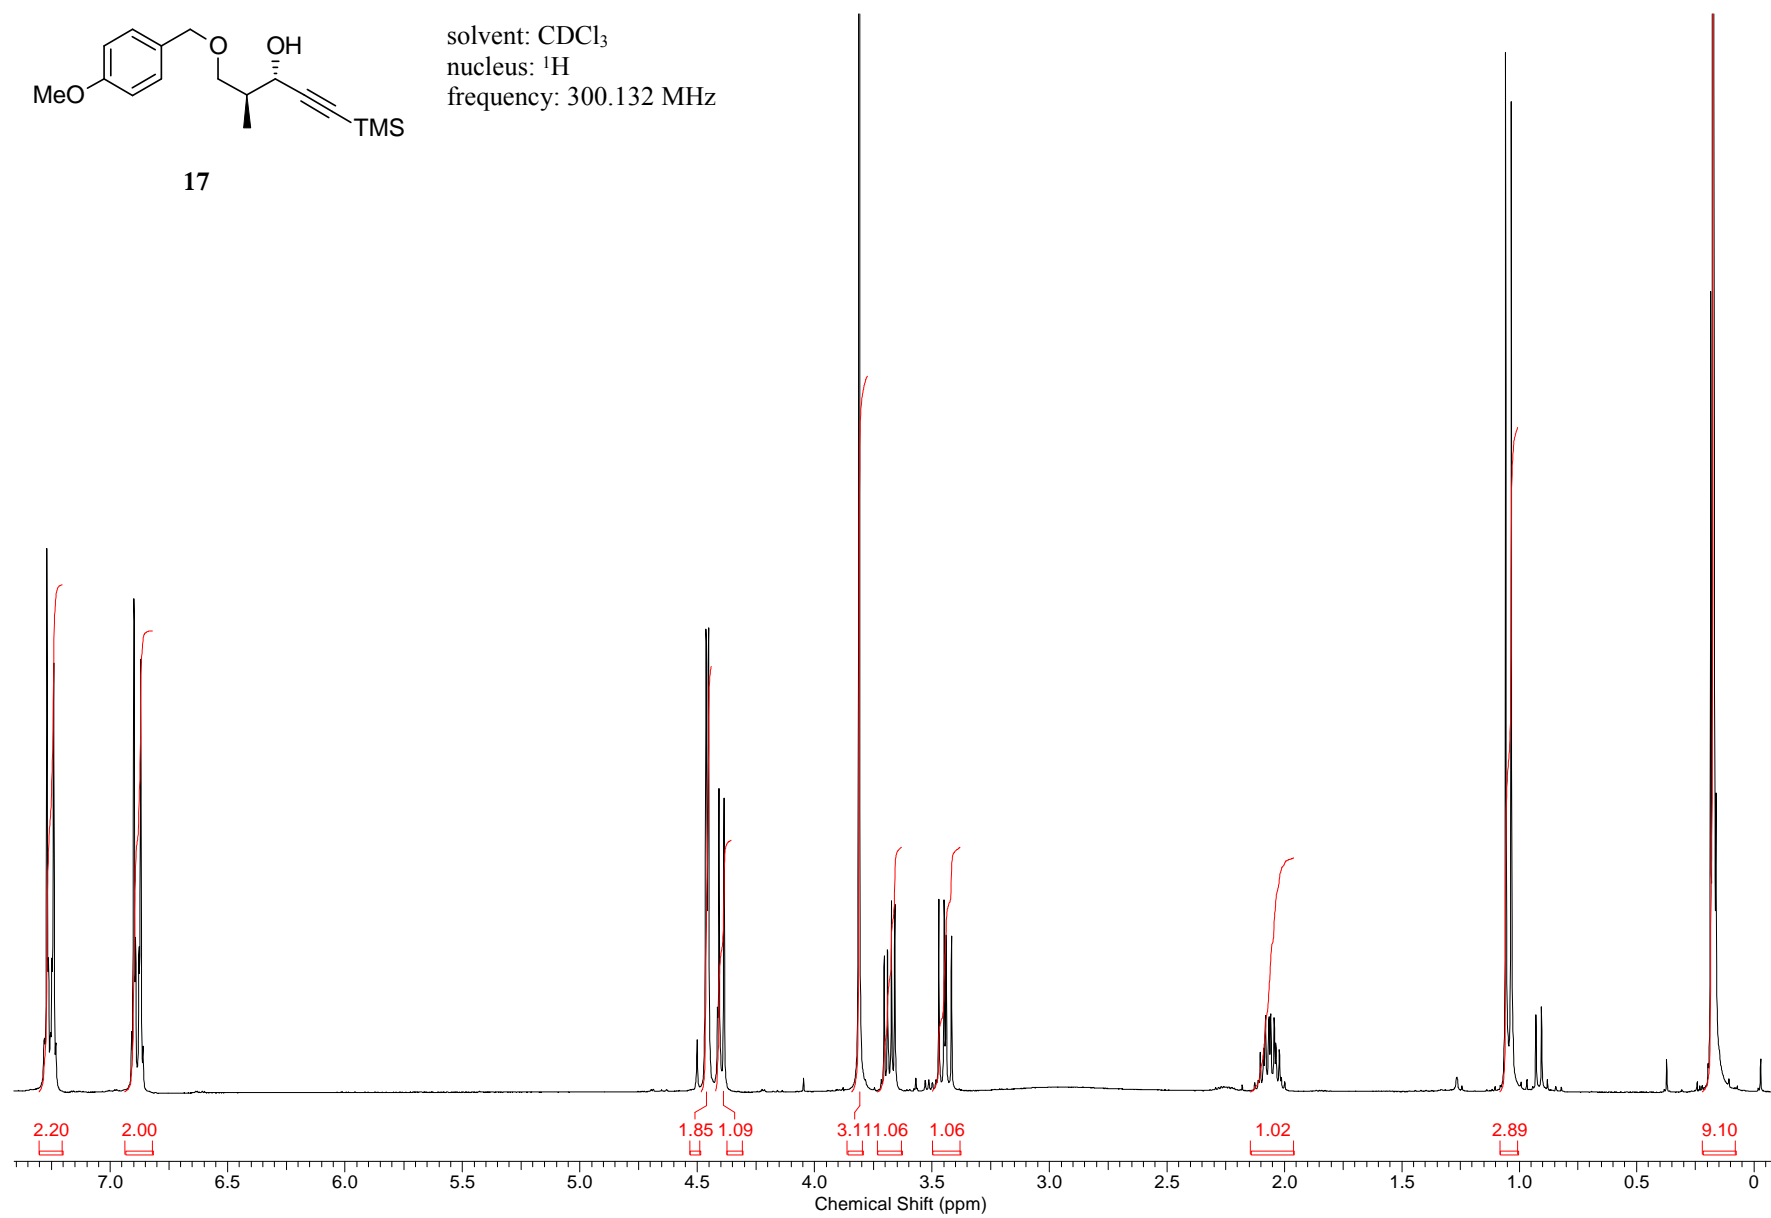

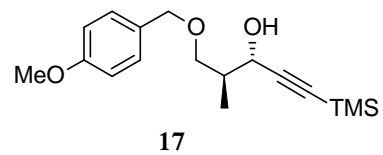

solvent: CDCl<sub>3</sub>  
nucleus: <sup>13</sup>C  
frequency: 75.48 MHz

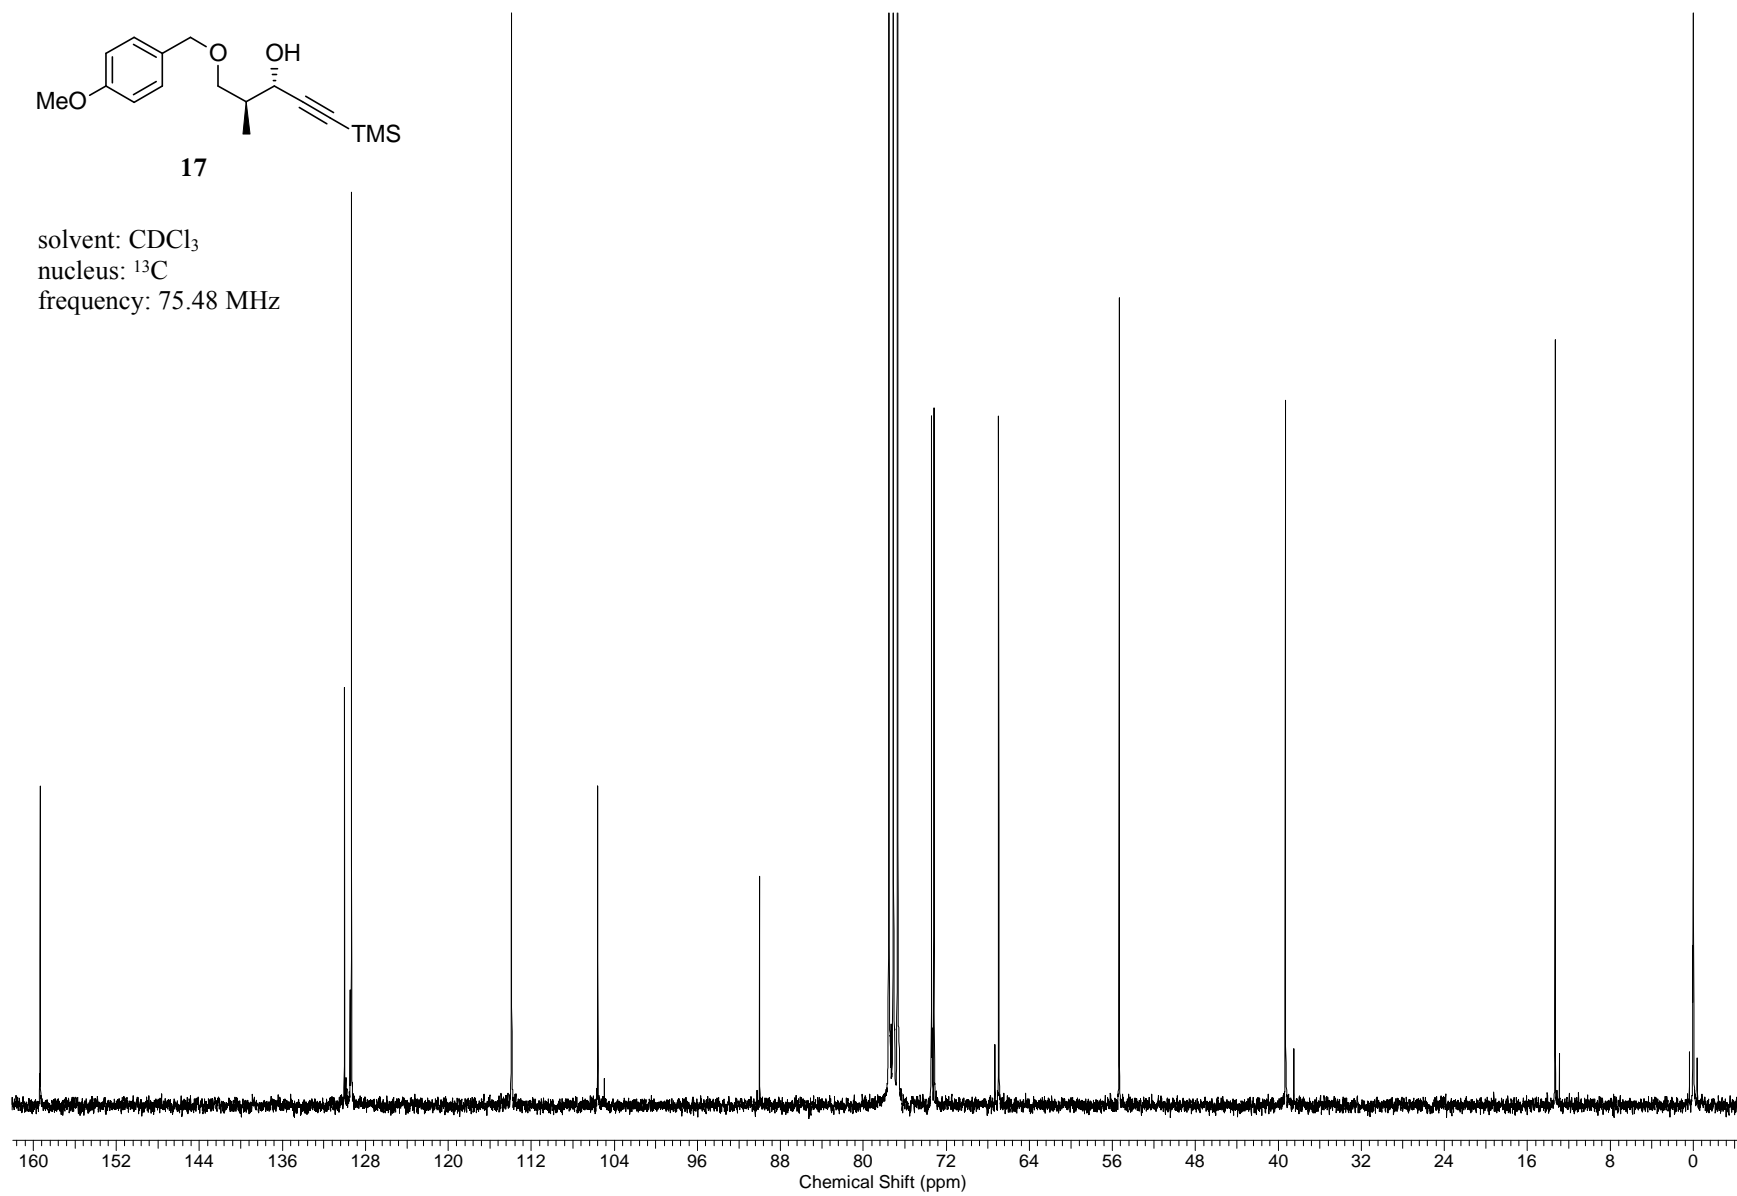



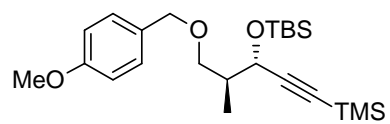

28

solvent: CDCl<sub>3</sub>  
nucleus: <sup>1</sup>H  
frequency: 300.132 MHz

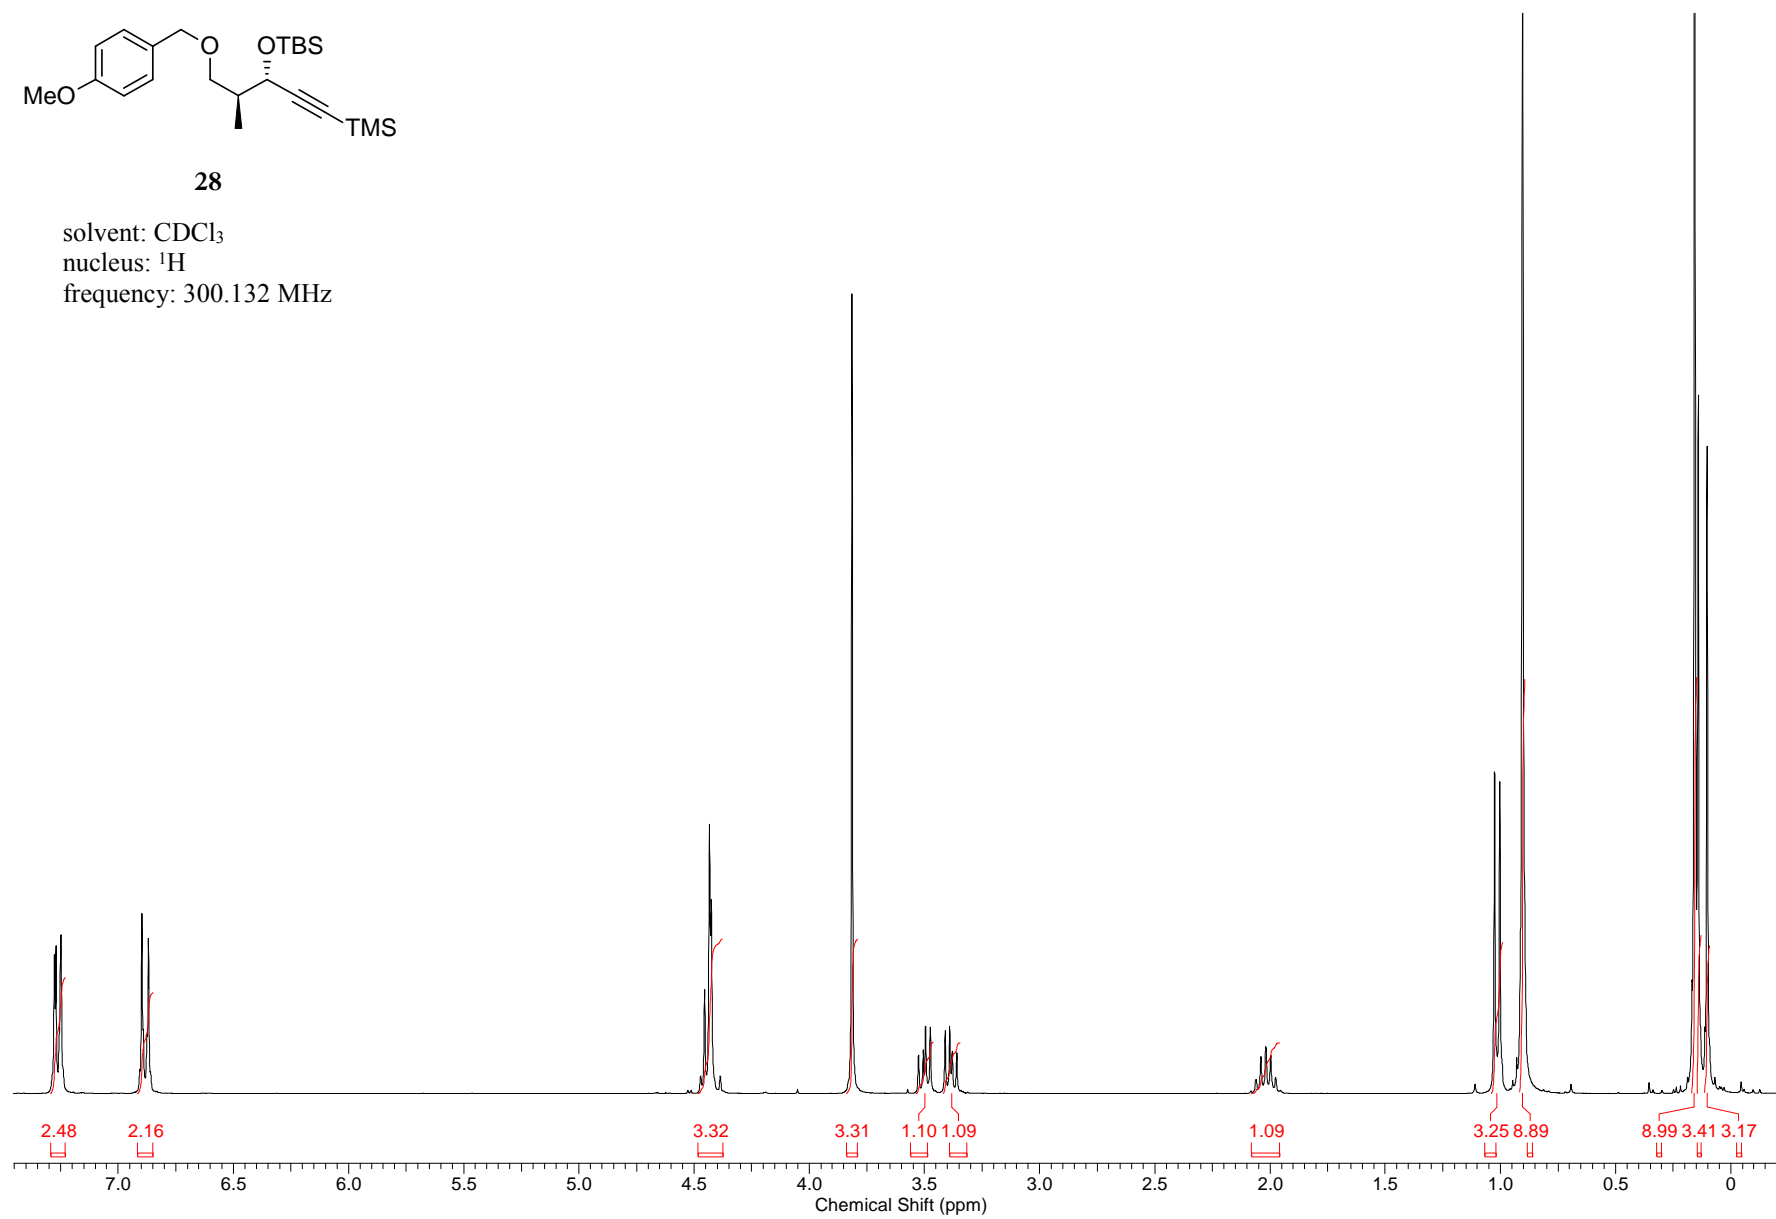

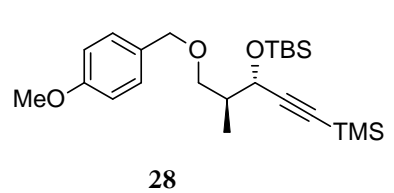

solvent: CDCl<sub>3</sub>  
nucleus: <sup>13</sup>C  
frequency: 75.48 MHz

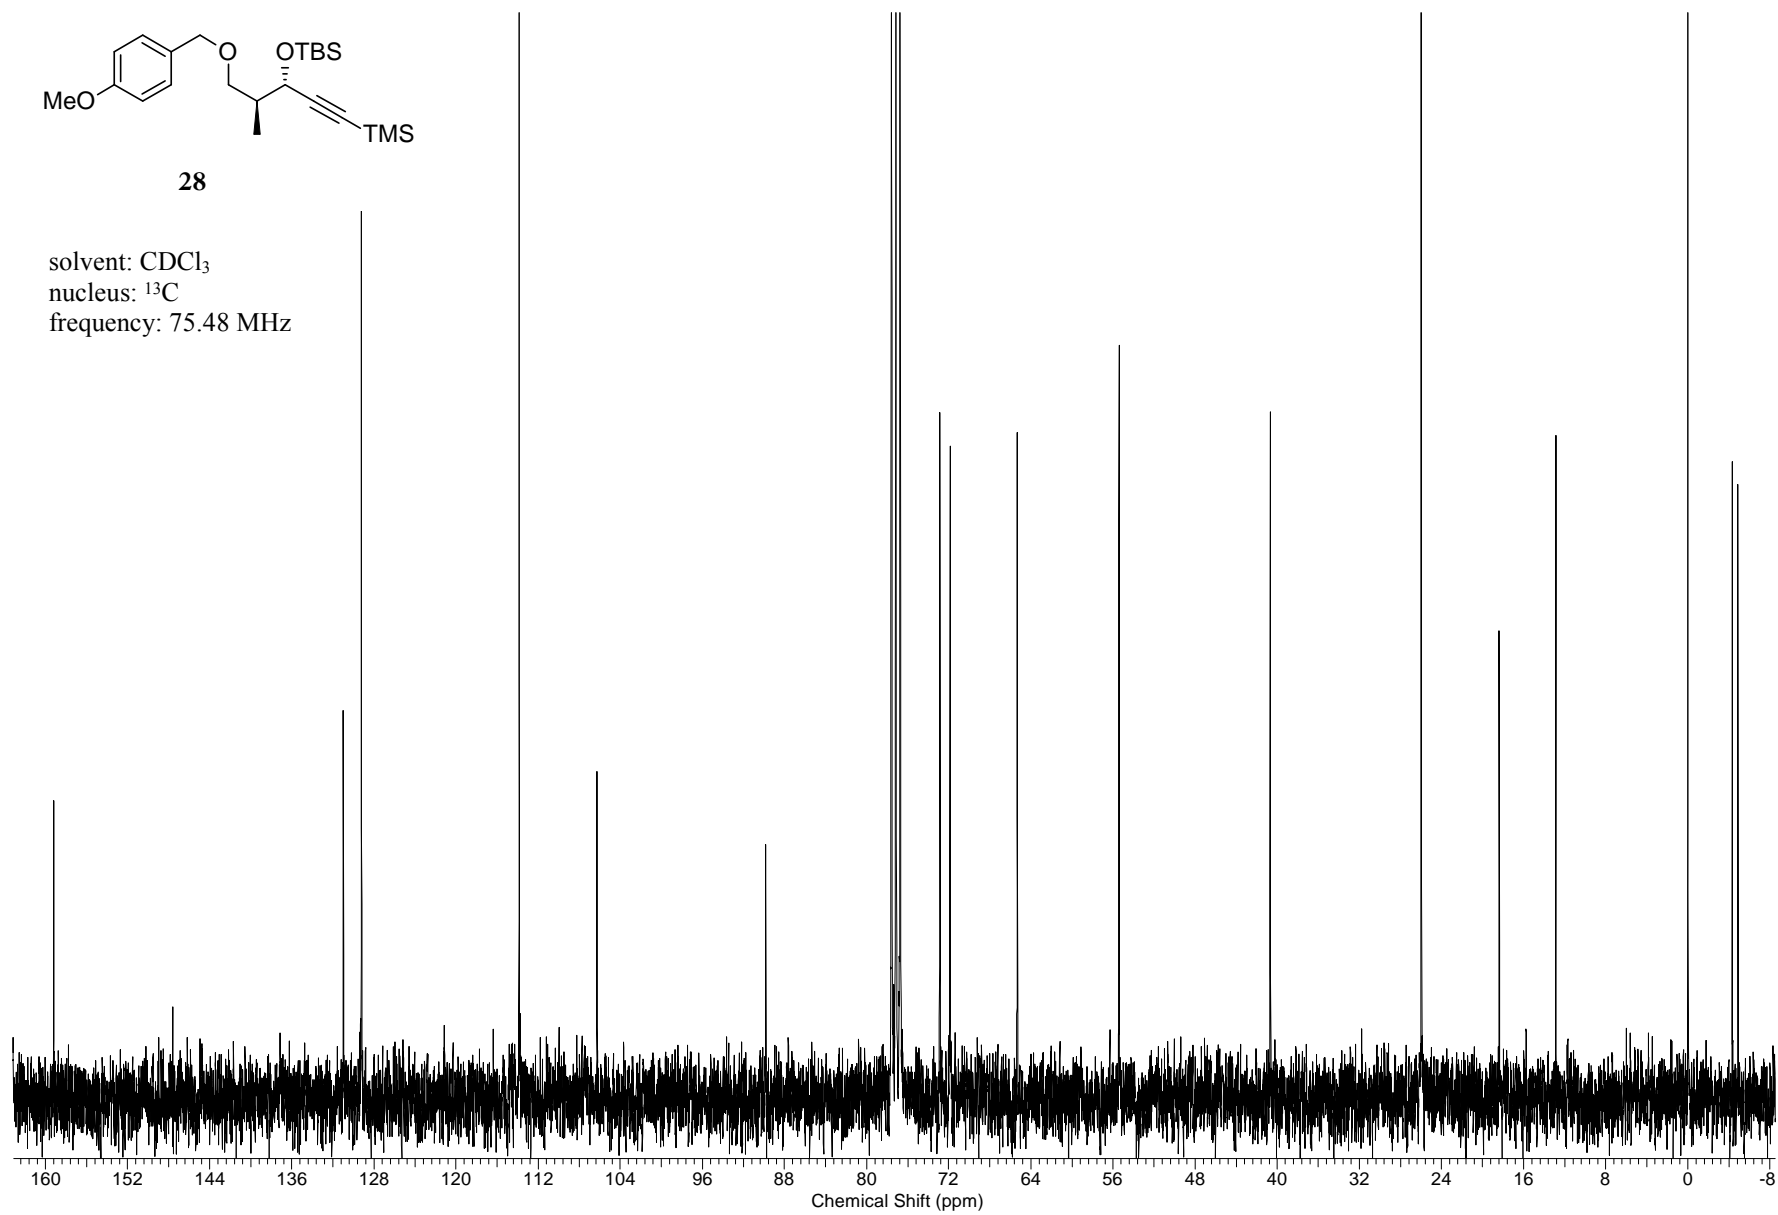

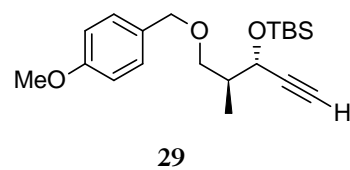

solvent: CDCl<sub>3</sub>  
nucleus: <sup>1</sup>H  
frequency: 300.132 MHz

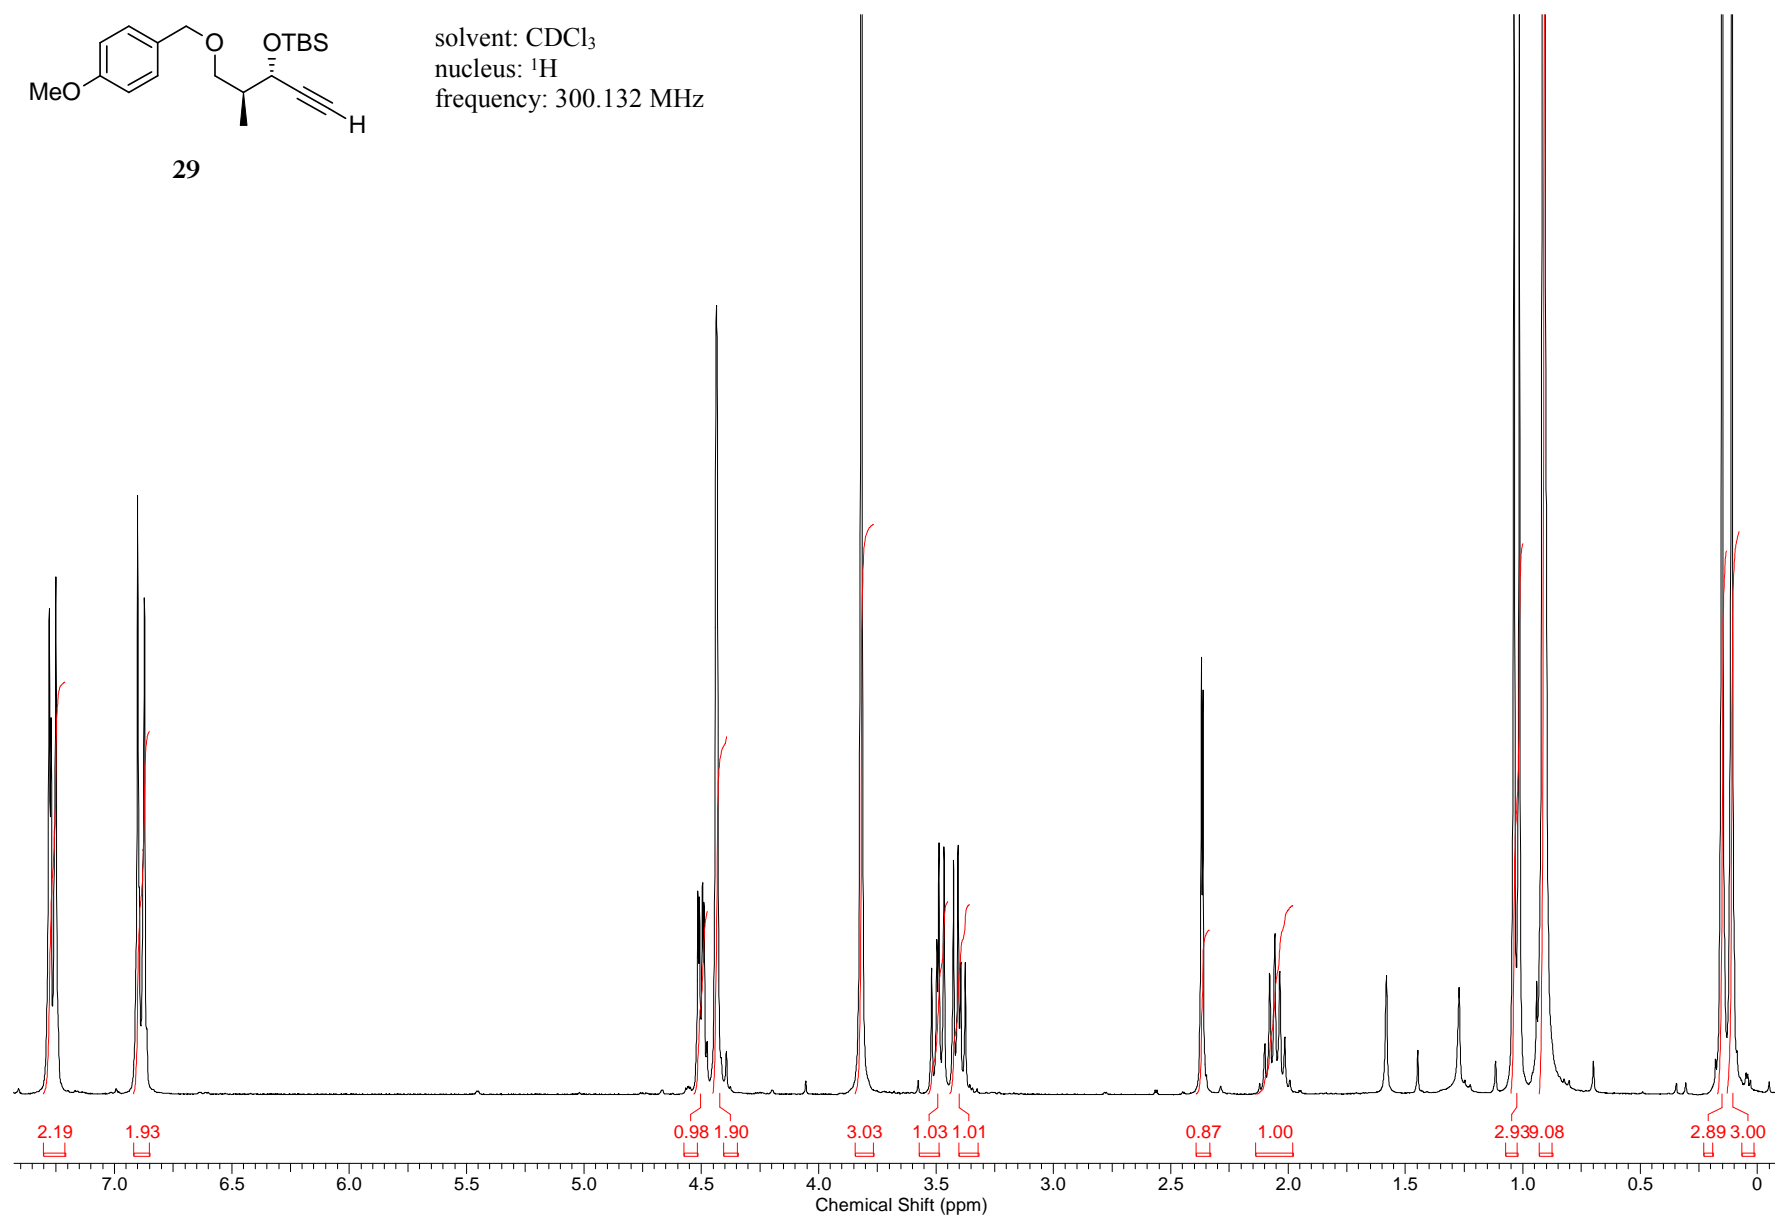

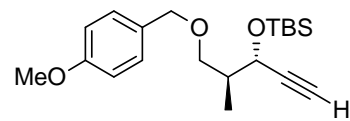

**29**

solvent: CDCl<sub>3</sub>  
nucleus: <sup>13</sup>C  
frequency: 75.48 MHz

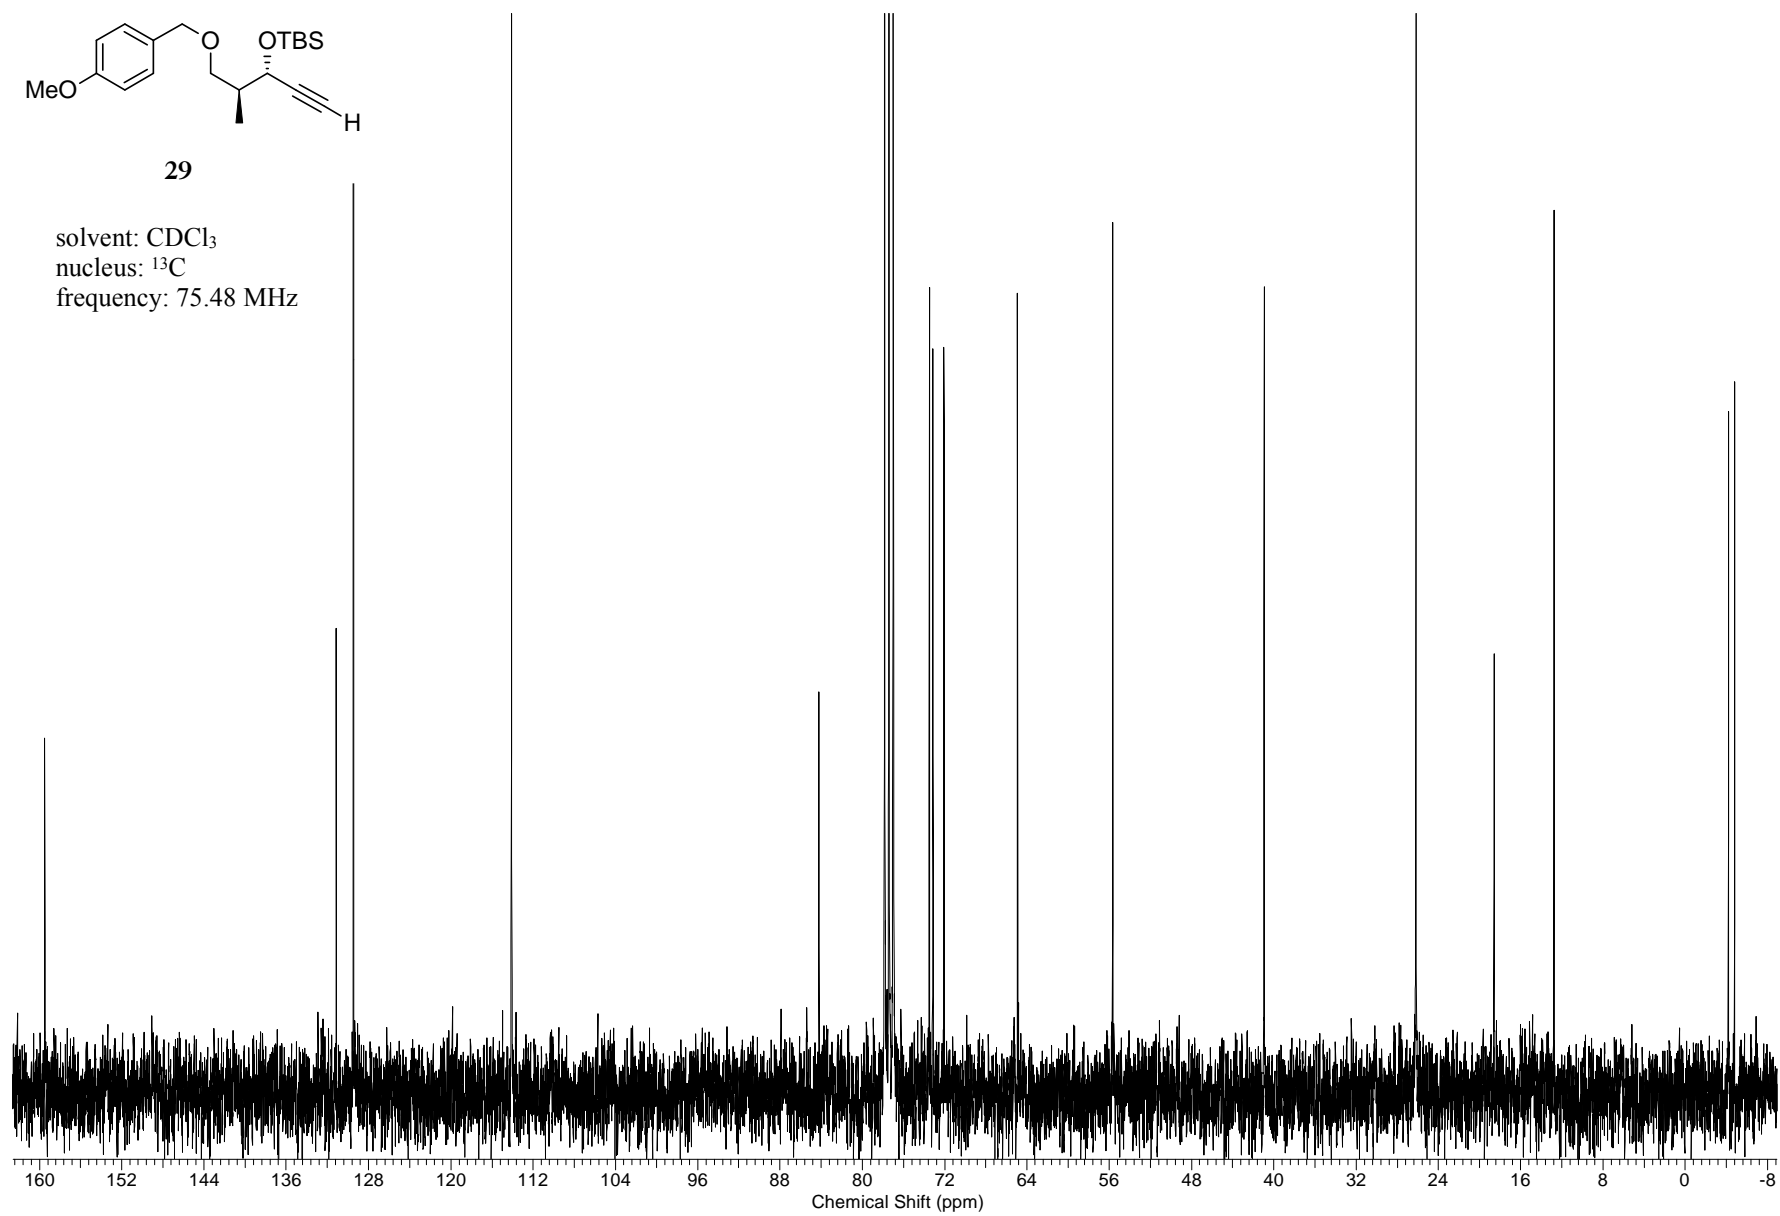

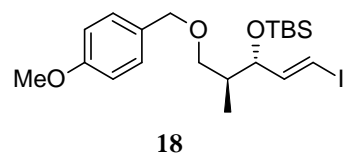

solvent: CDCl<sub>3</sub>  
nucleus: <sup>1</sup>H  
frequency: 300.132 MHz

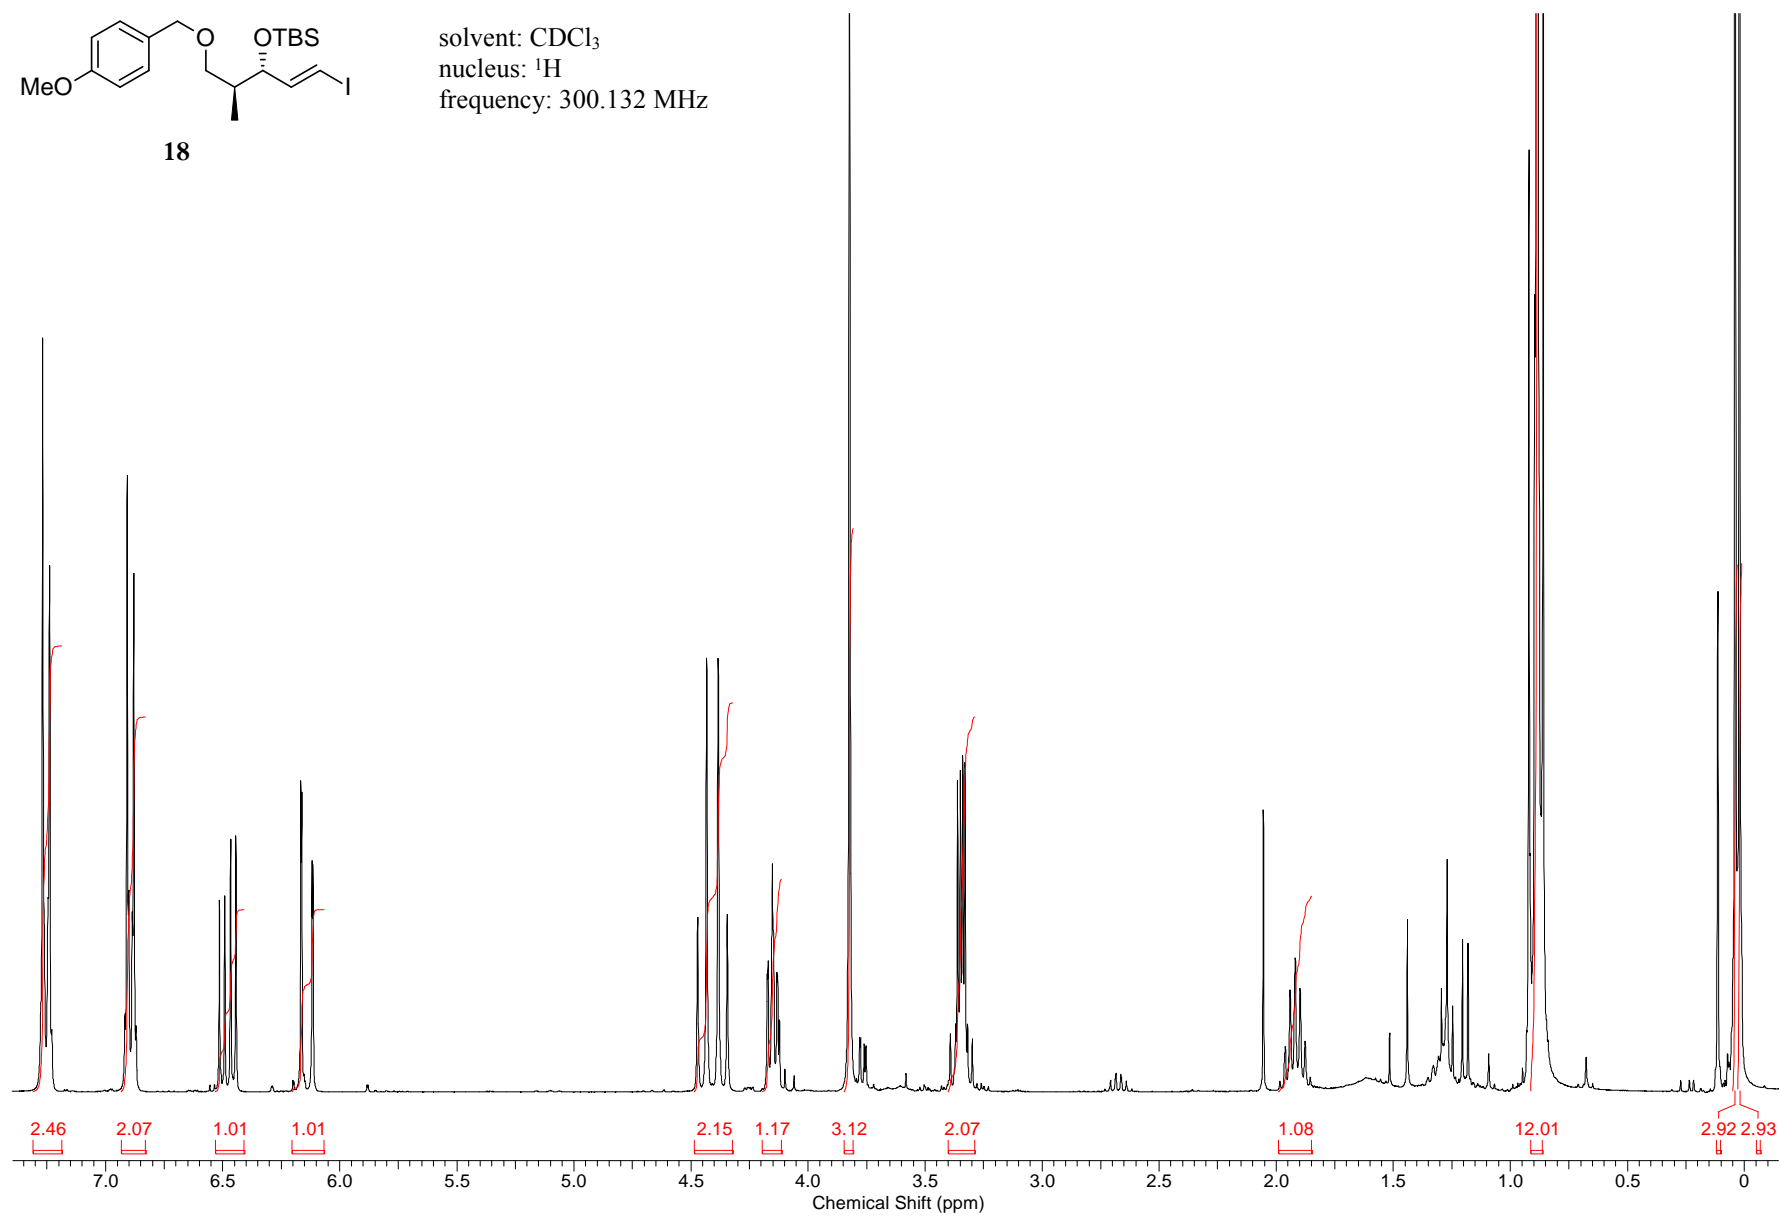

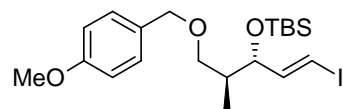

**18**

solvent: CDCl<sub>3</sub>  
nucleus: <sup>13</sup>C  
frequency: 75.48 MHz

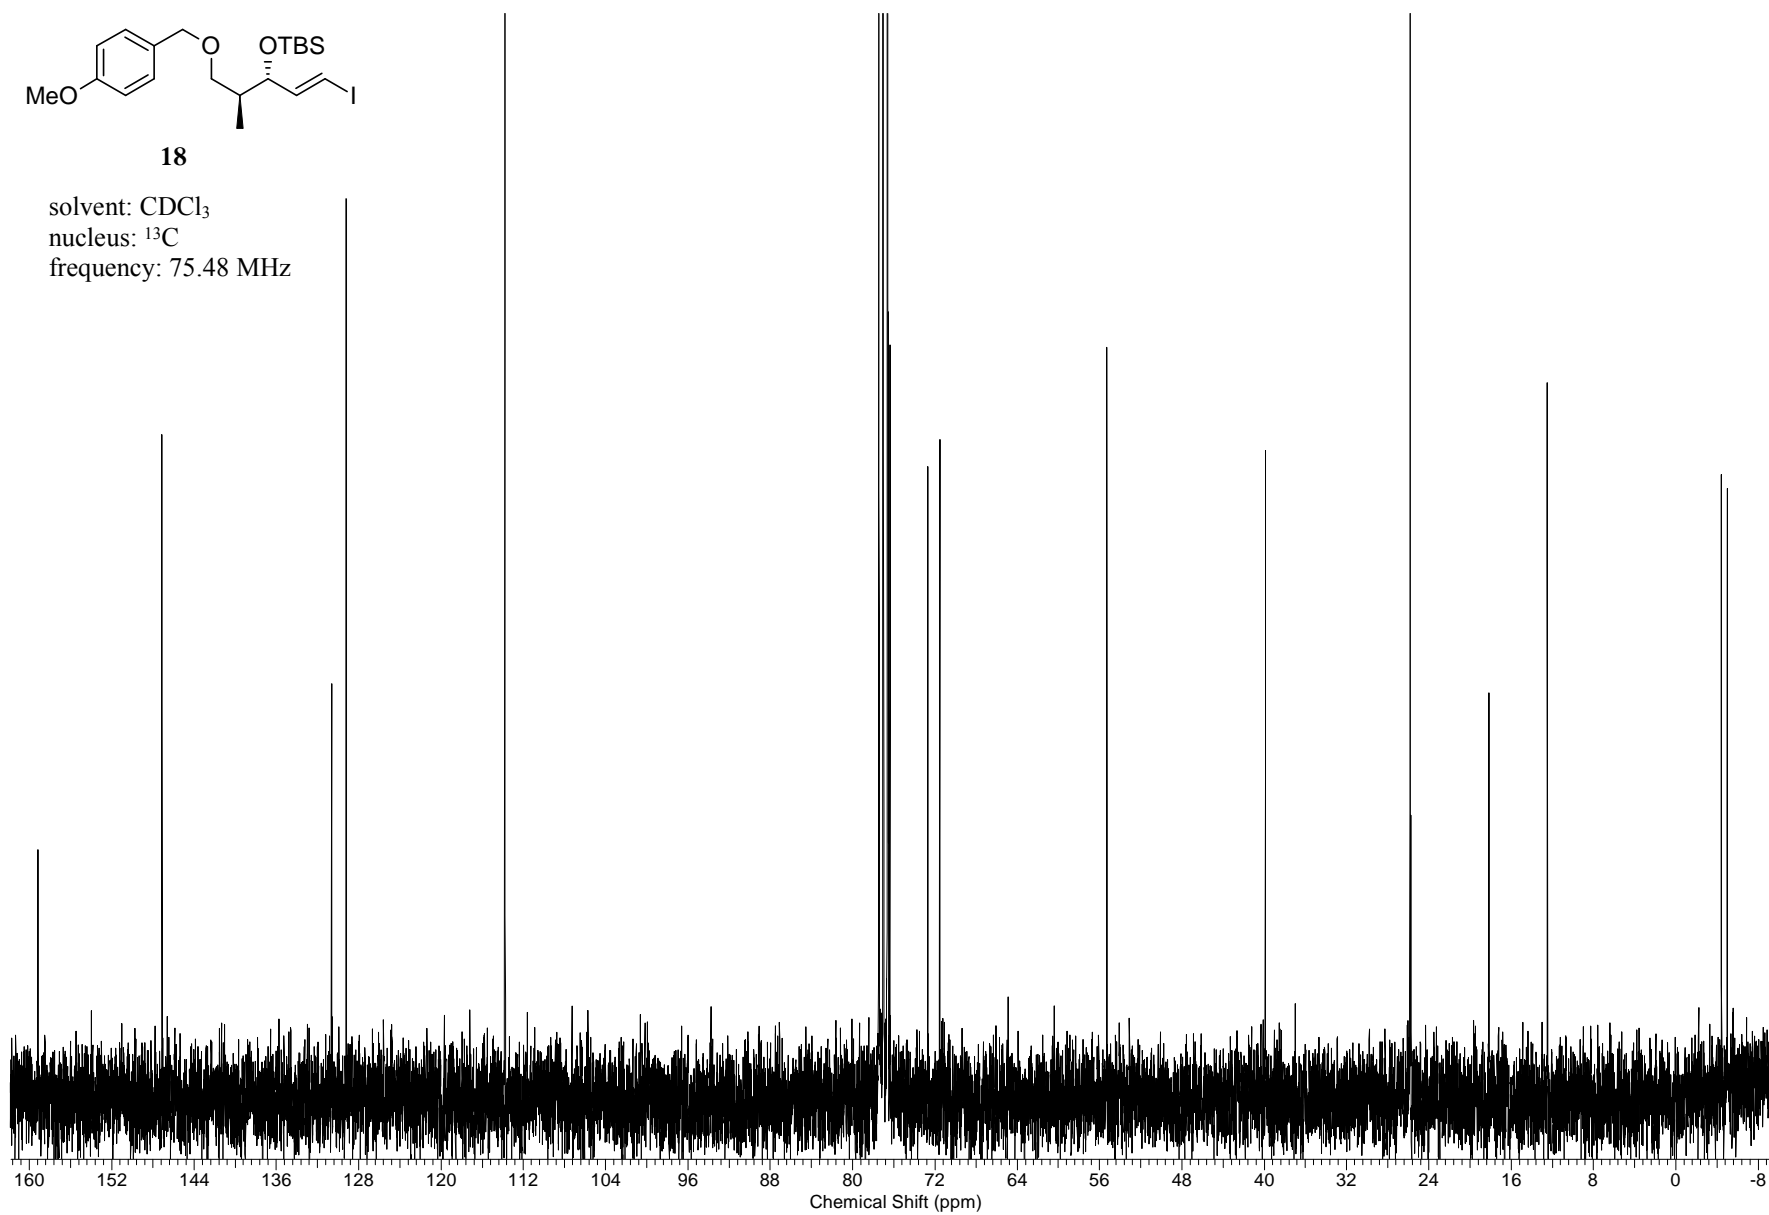

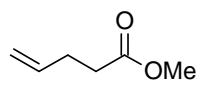

30

solvent: CDCl<sub>3</sub>  
nucleus: <sup>1</sup>H  
frequency: 300.132 MHz

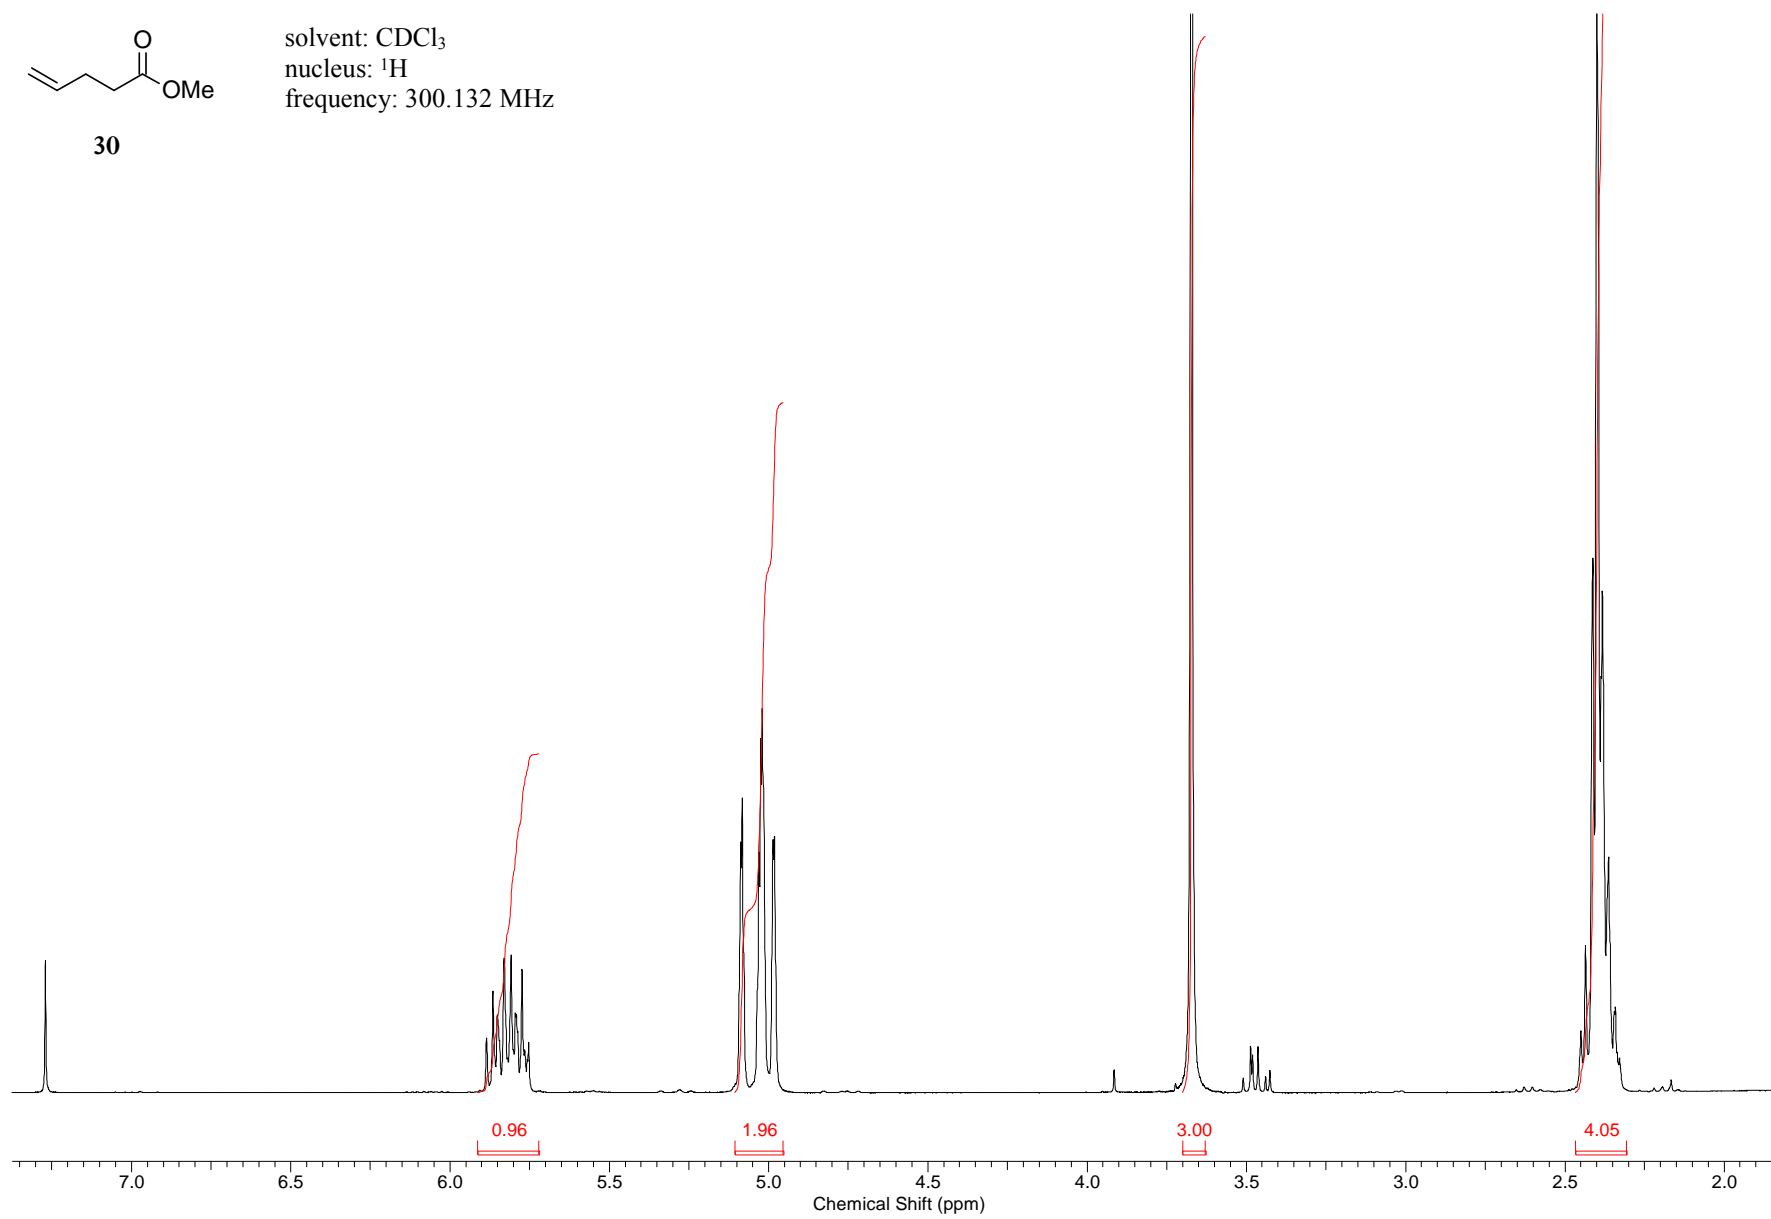

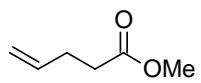

**30**

solvent: CDCl<sub>3</sub>  
nucleus: <sup>13</sup>C  
frequency: 75.48 MHz

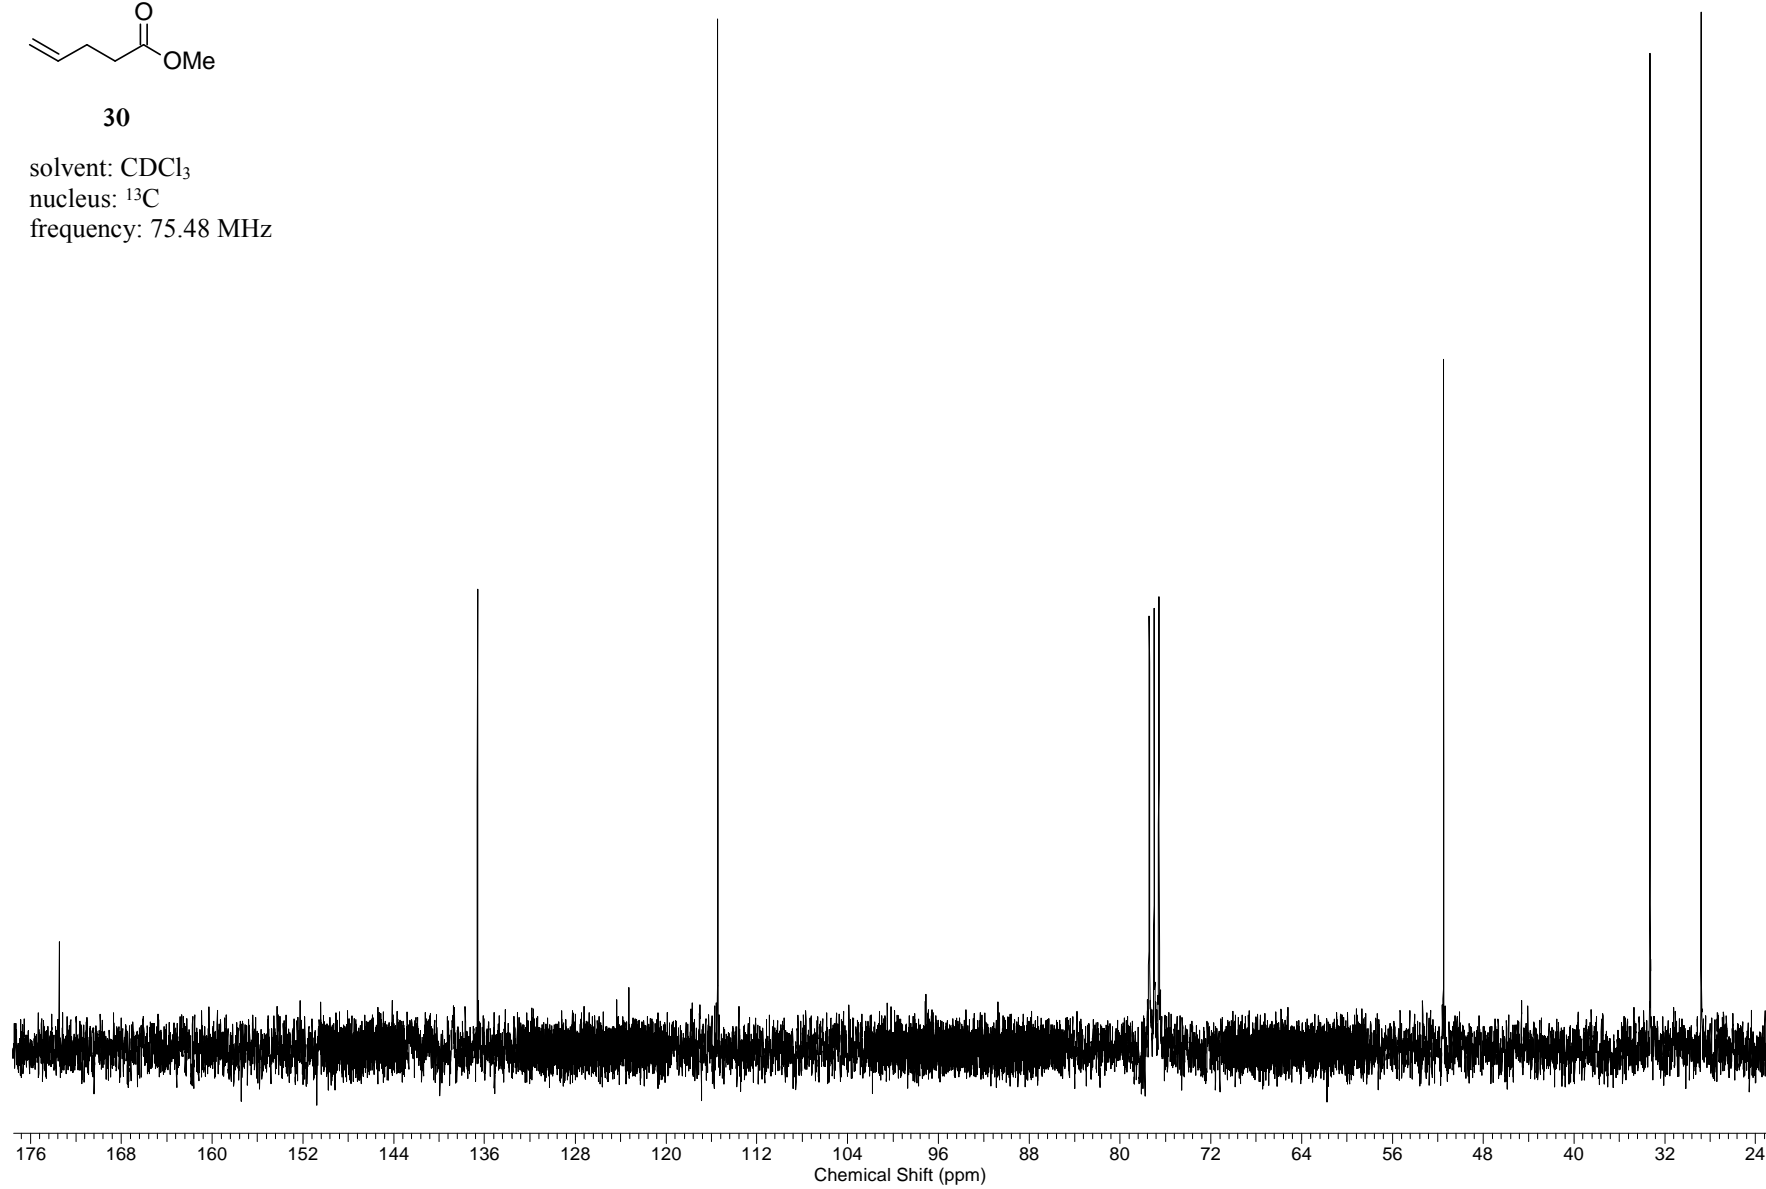



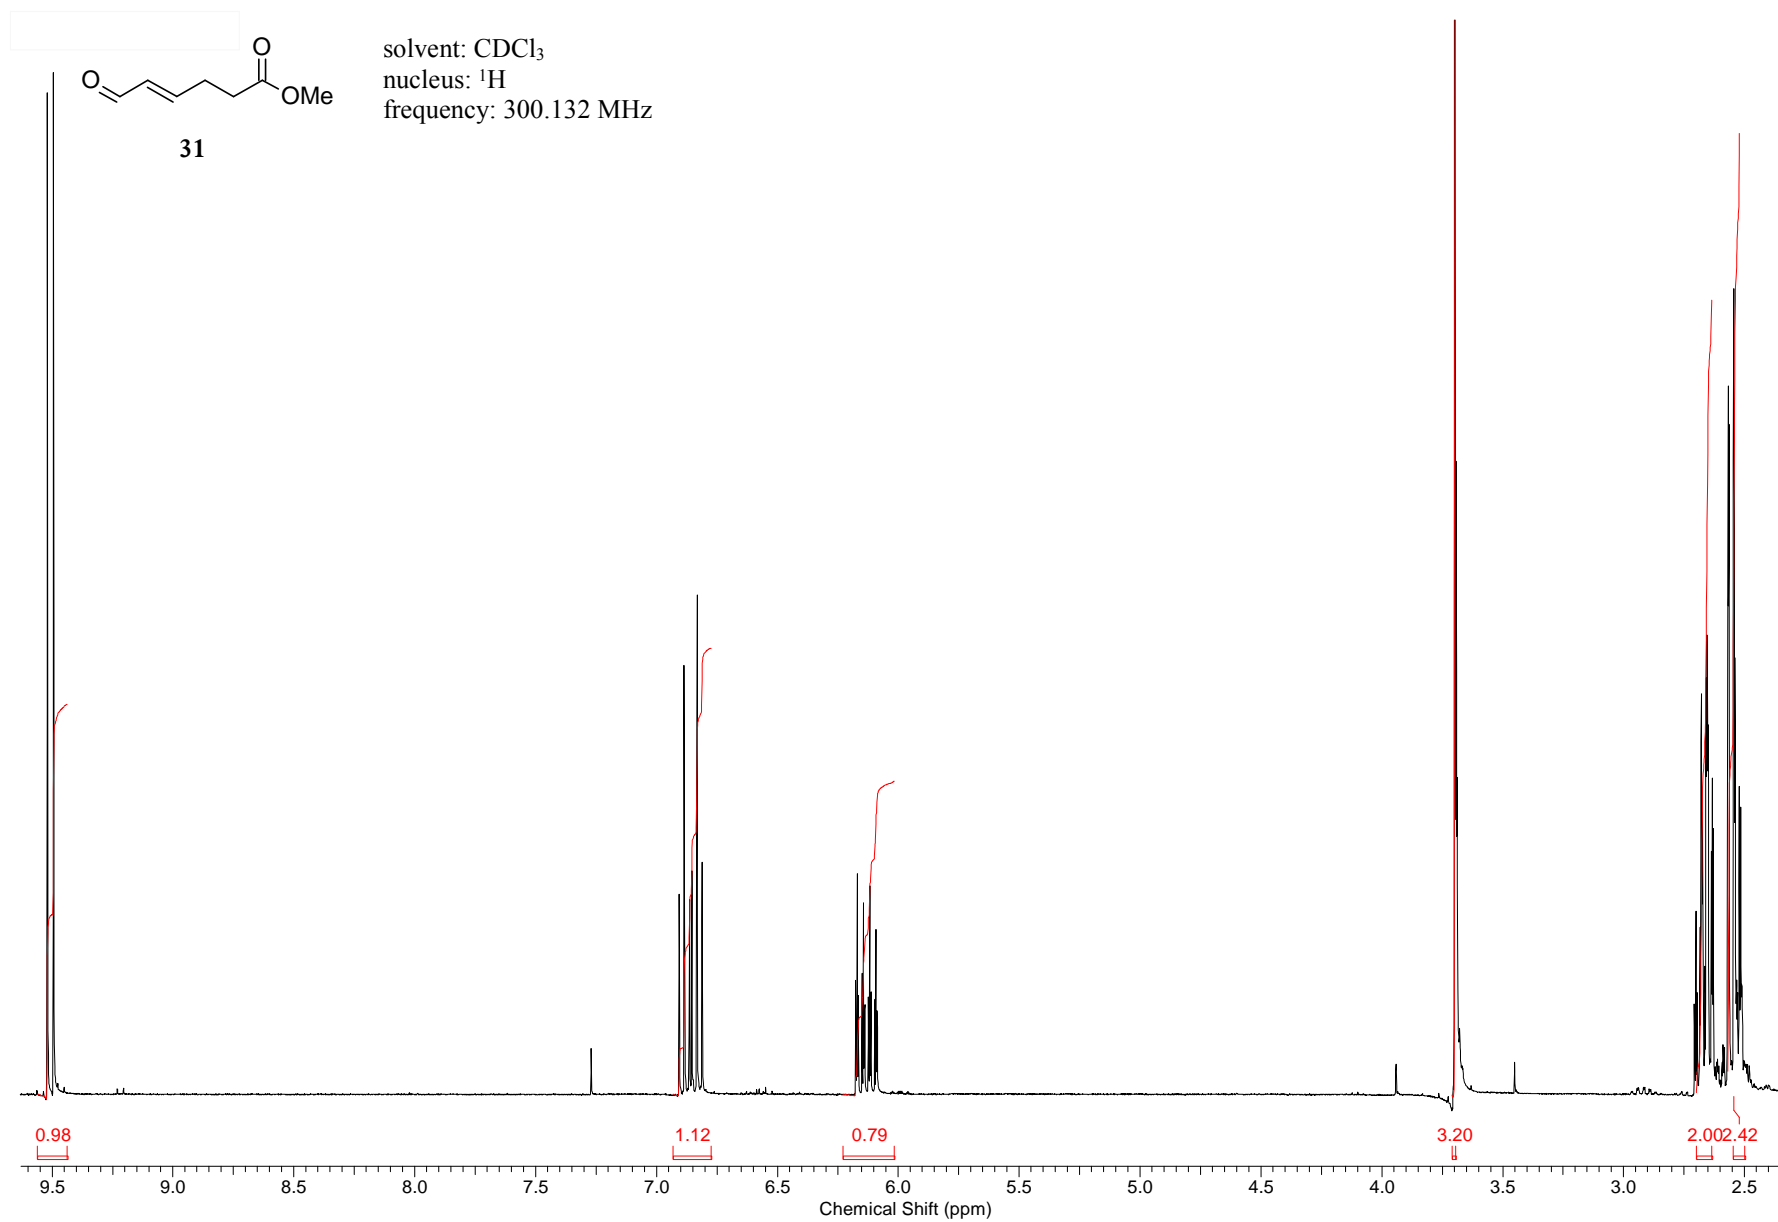

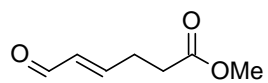

31

solvent: CDCl<sub>3</sub>  
nucleus: <sup>13</sup>C  
frequency: 75.48 MHz

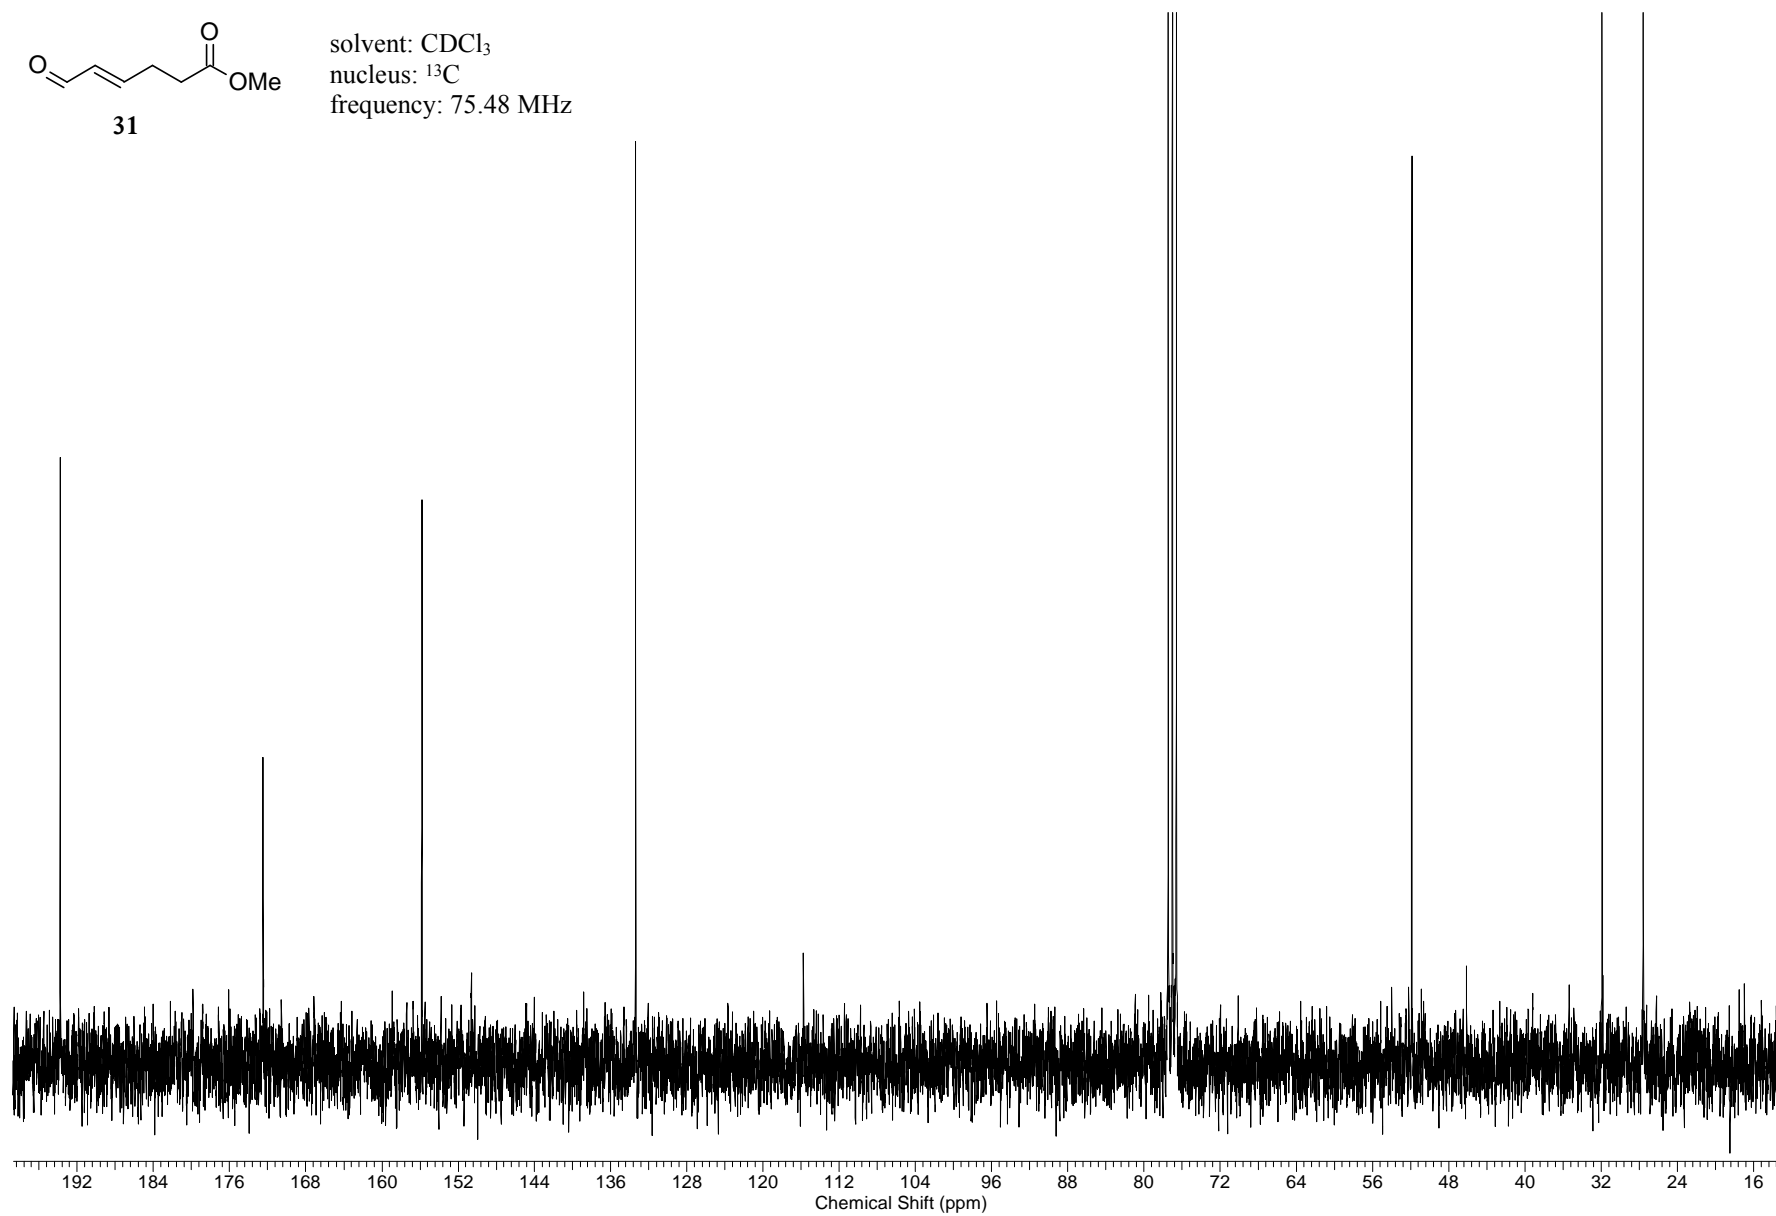

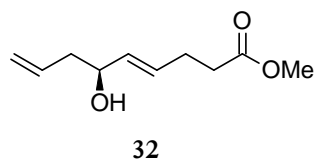

solvent: CDCl<sub>3</sub>  
nucleus: <sup>1</sup>H  
frequency: 300.132 MHz

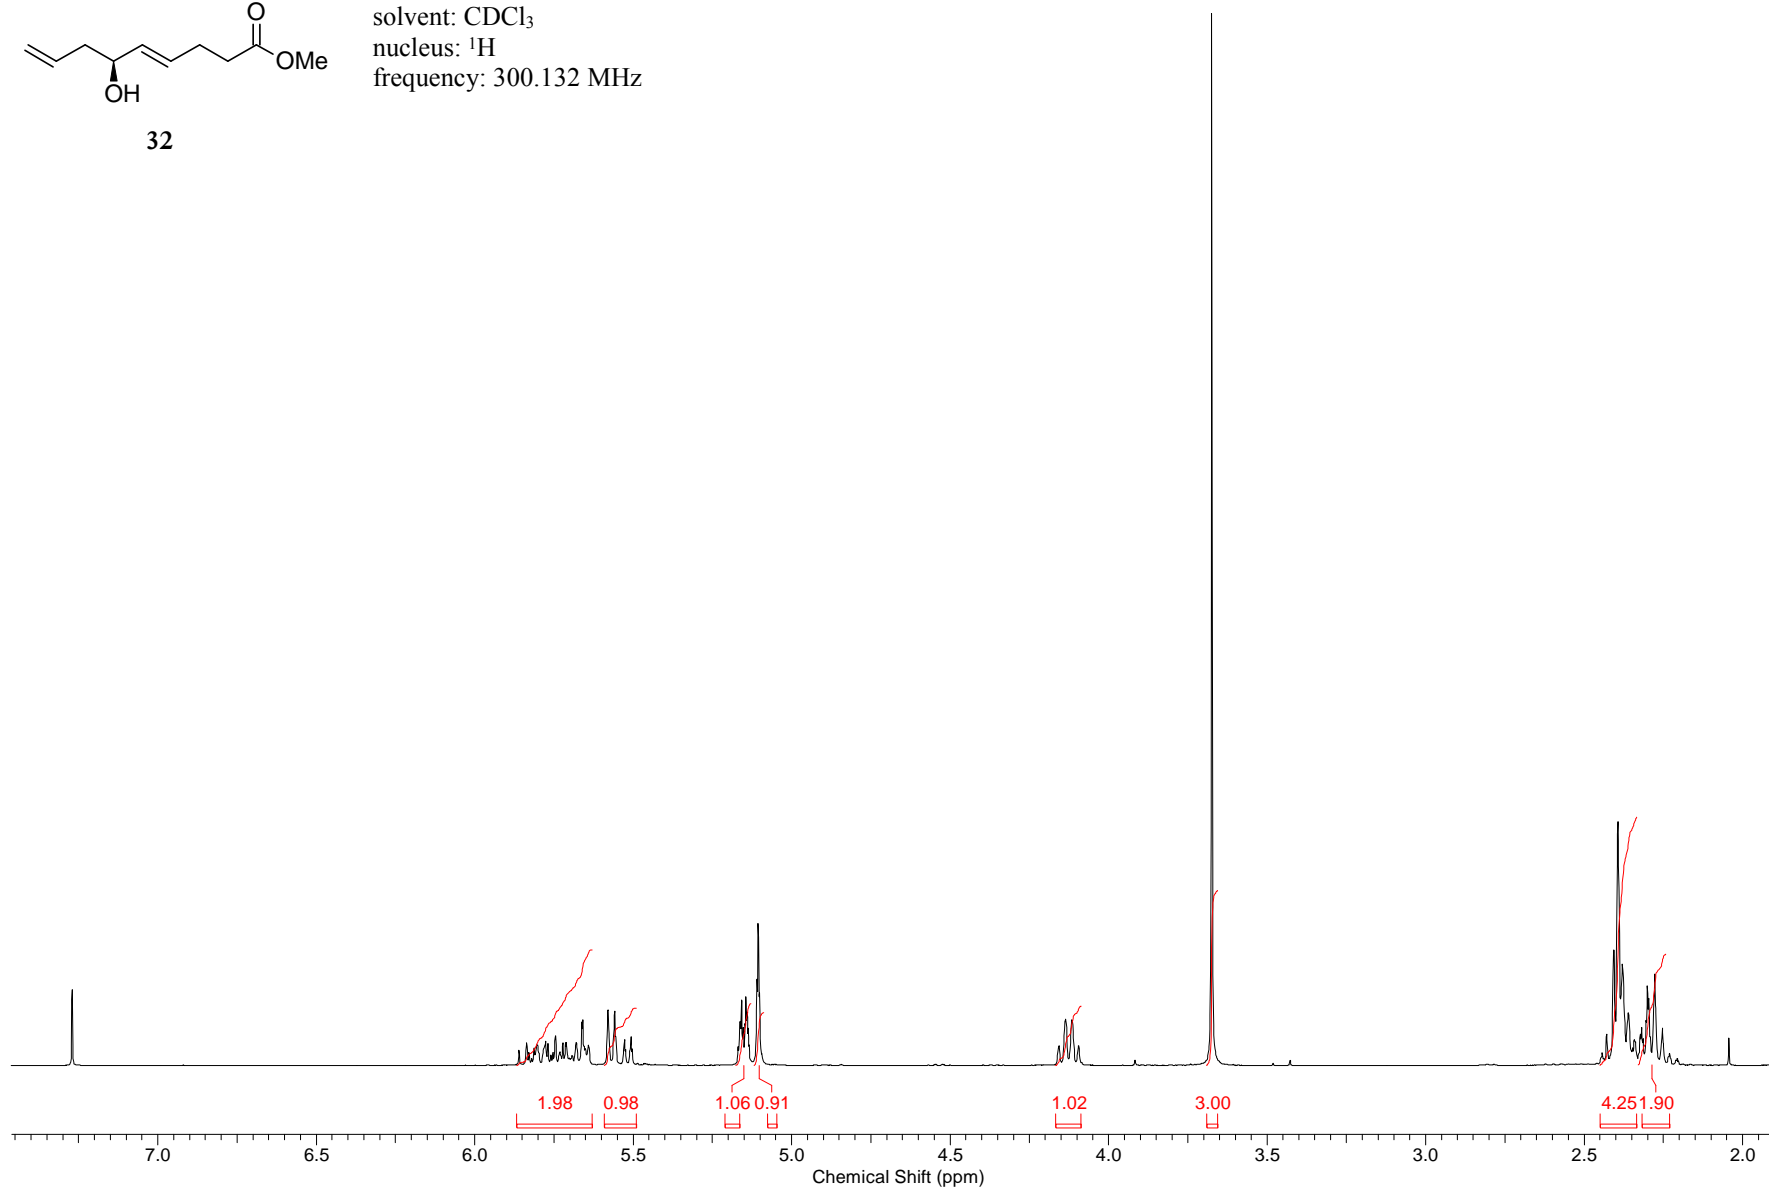

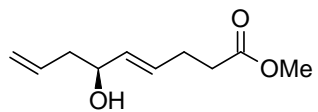

32

solvent: CDCl<sub>3</sub>  
nucleus: <sup>13</sup>C  
frequency: 75.48 MHz

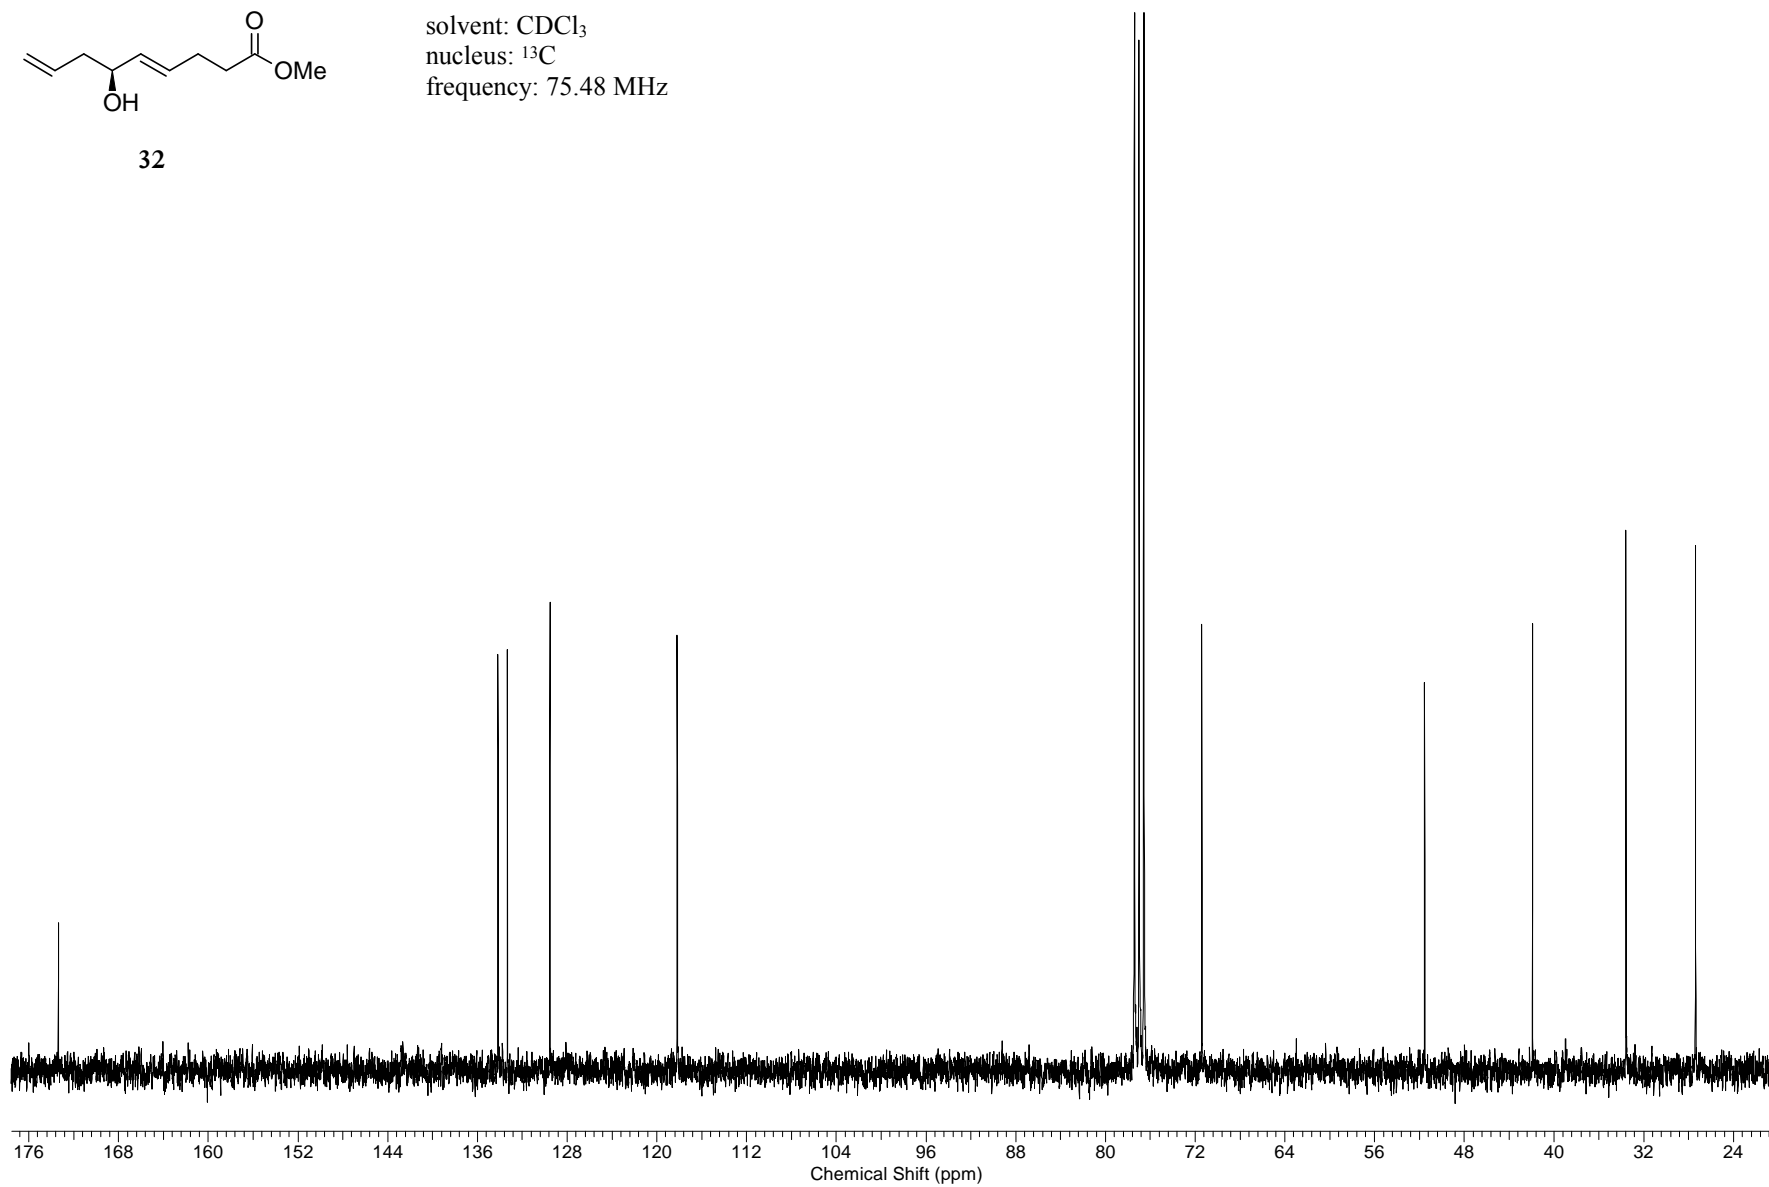

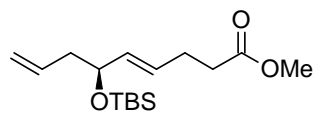

33

solvent: CDCl<sub>3</sub>  
nucleus: <sup>1</sup>H  
frequency: 300.132 MHz

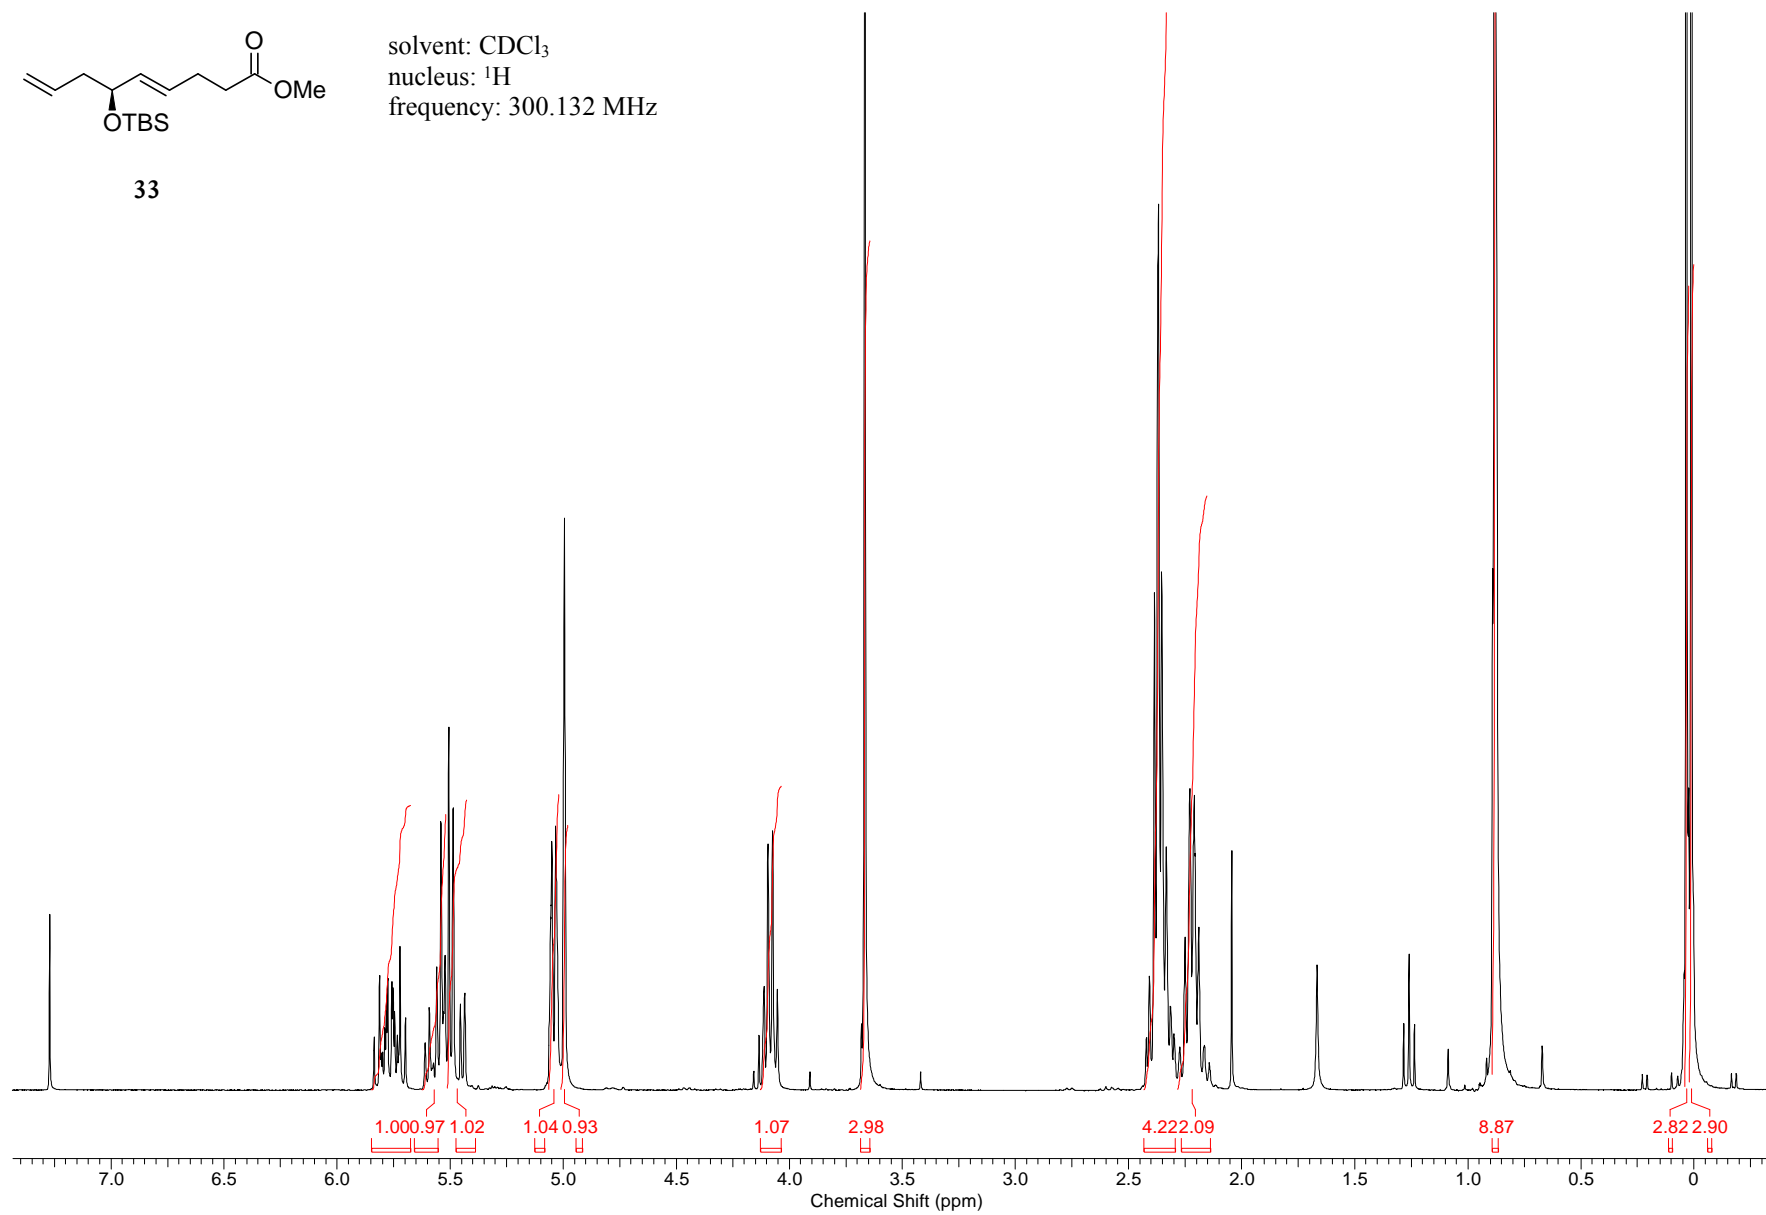

S101

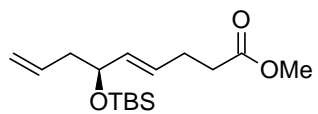

33

solvent: CDCl<sub>3</sub>  
nucleus: <sup>13</sup>C  
frequency: 75.48 MHz

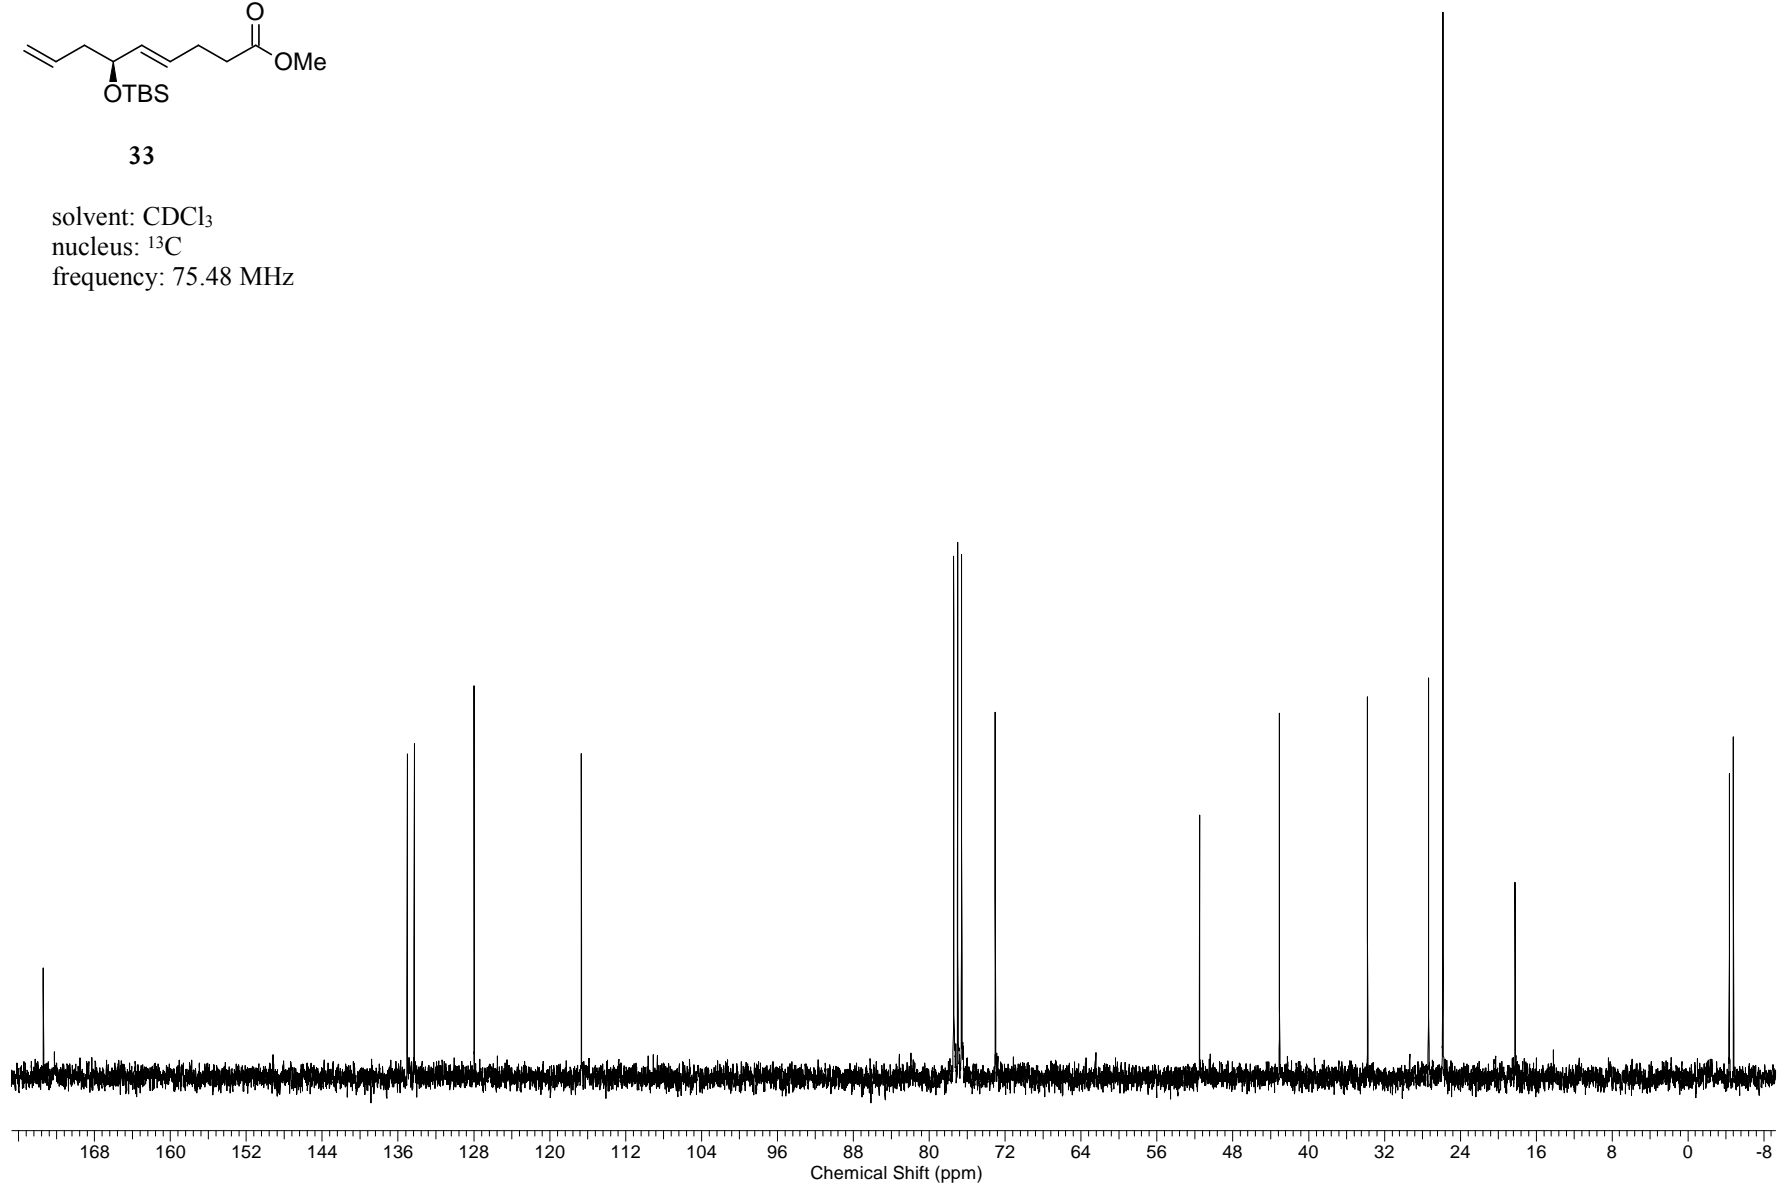

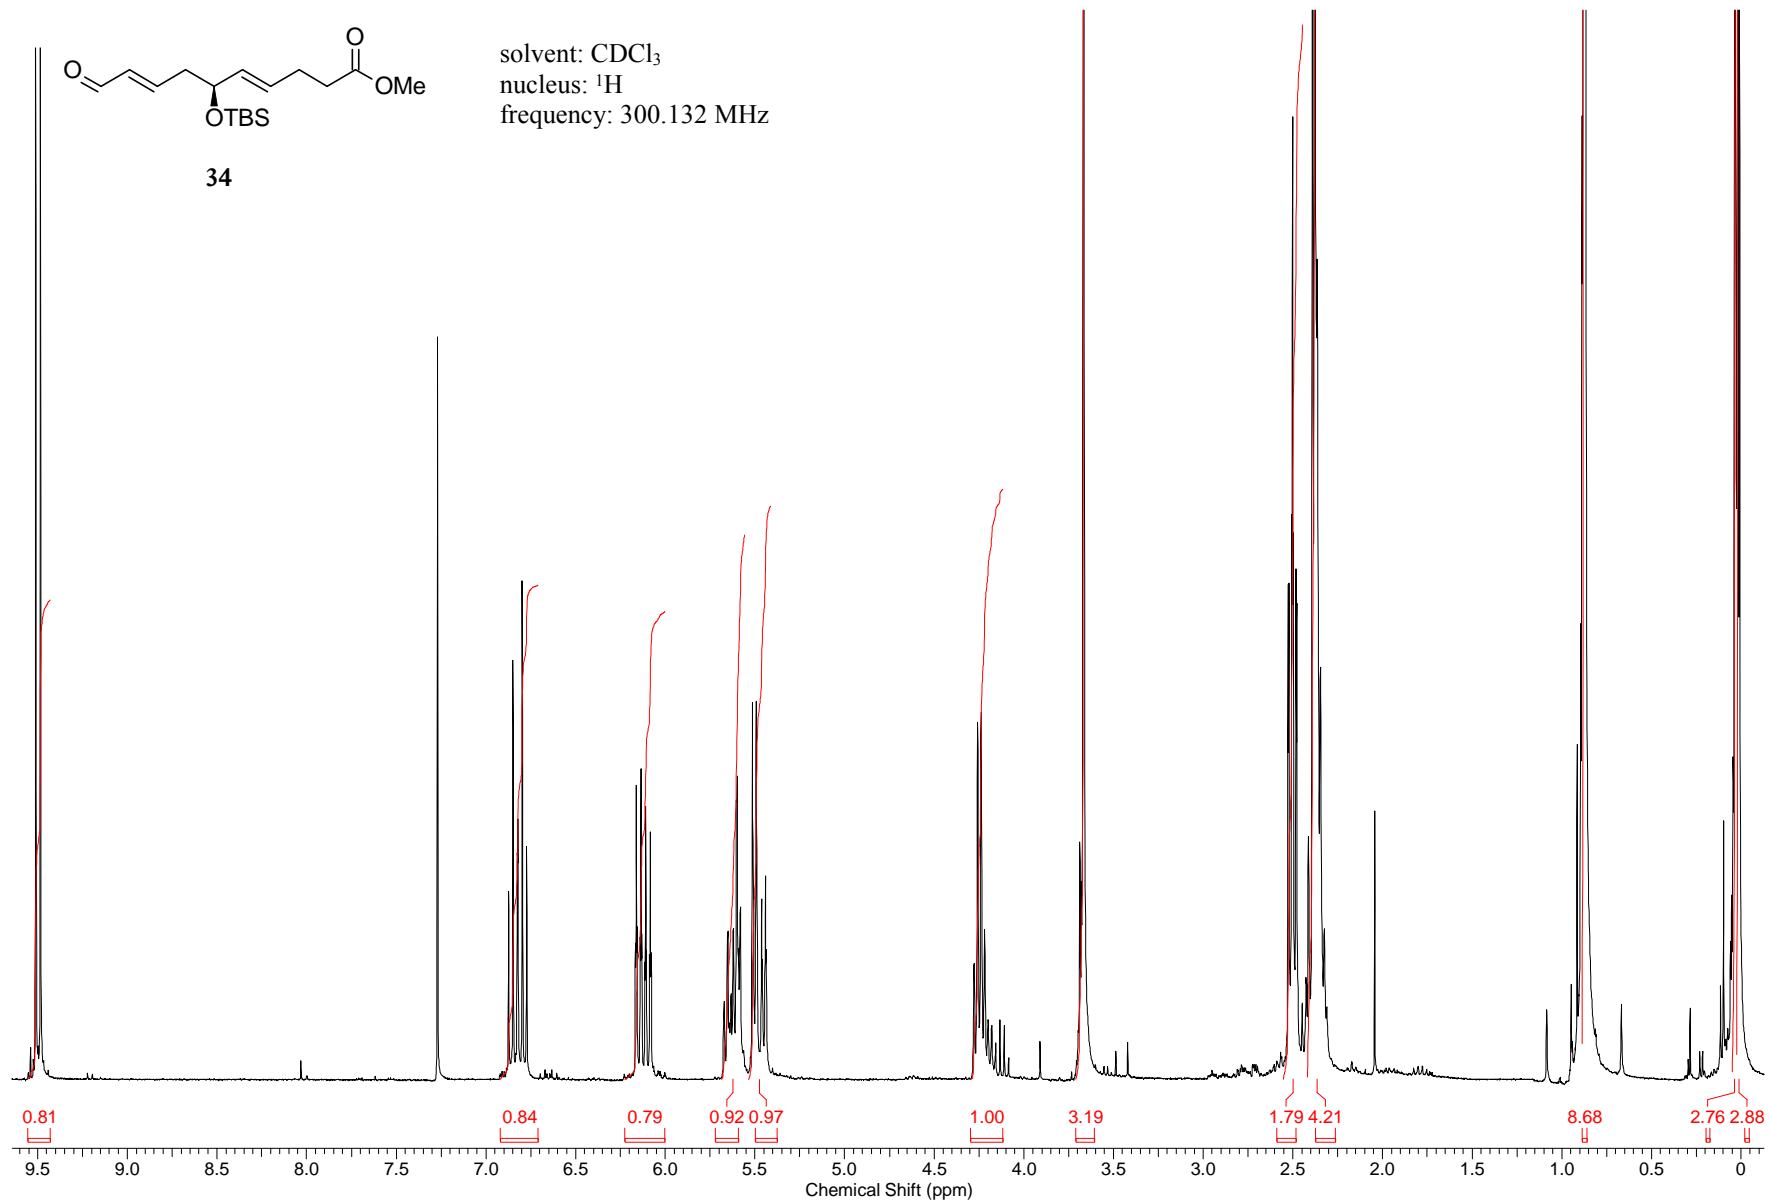

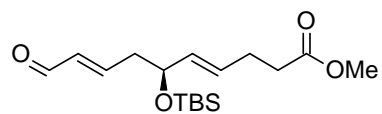

34

solvent: CDCl<sub>3</sub>  
nucleus: <sup>13</sup>C  
frequency: 75.48 MHz

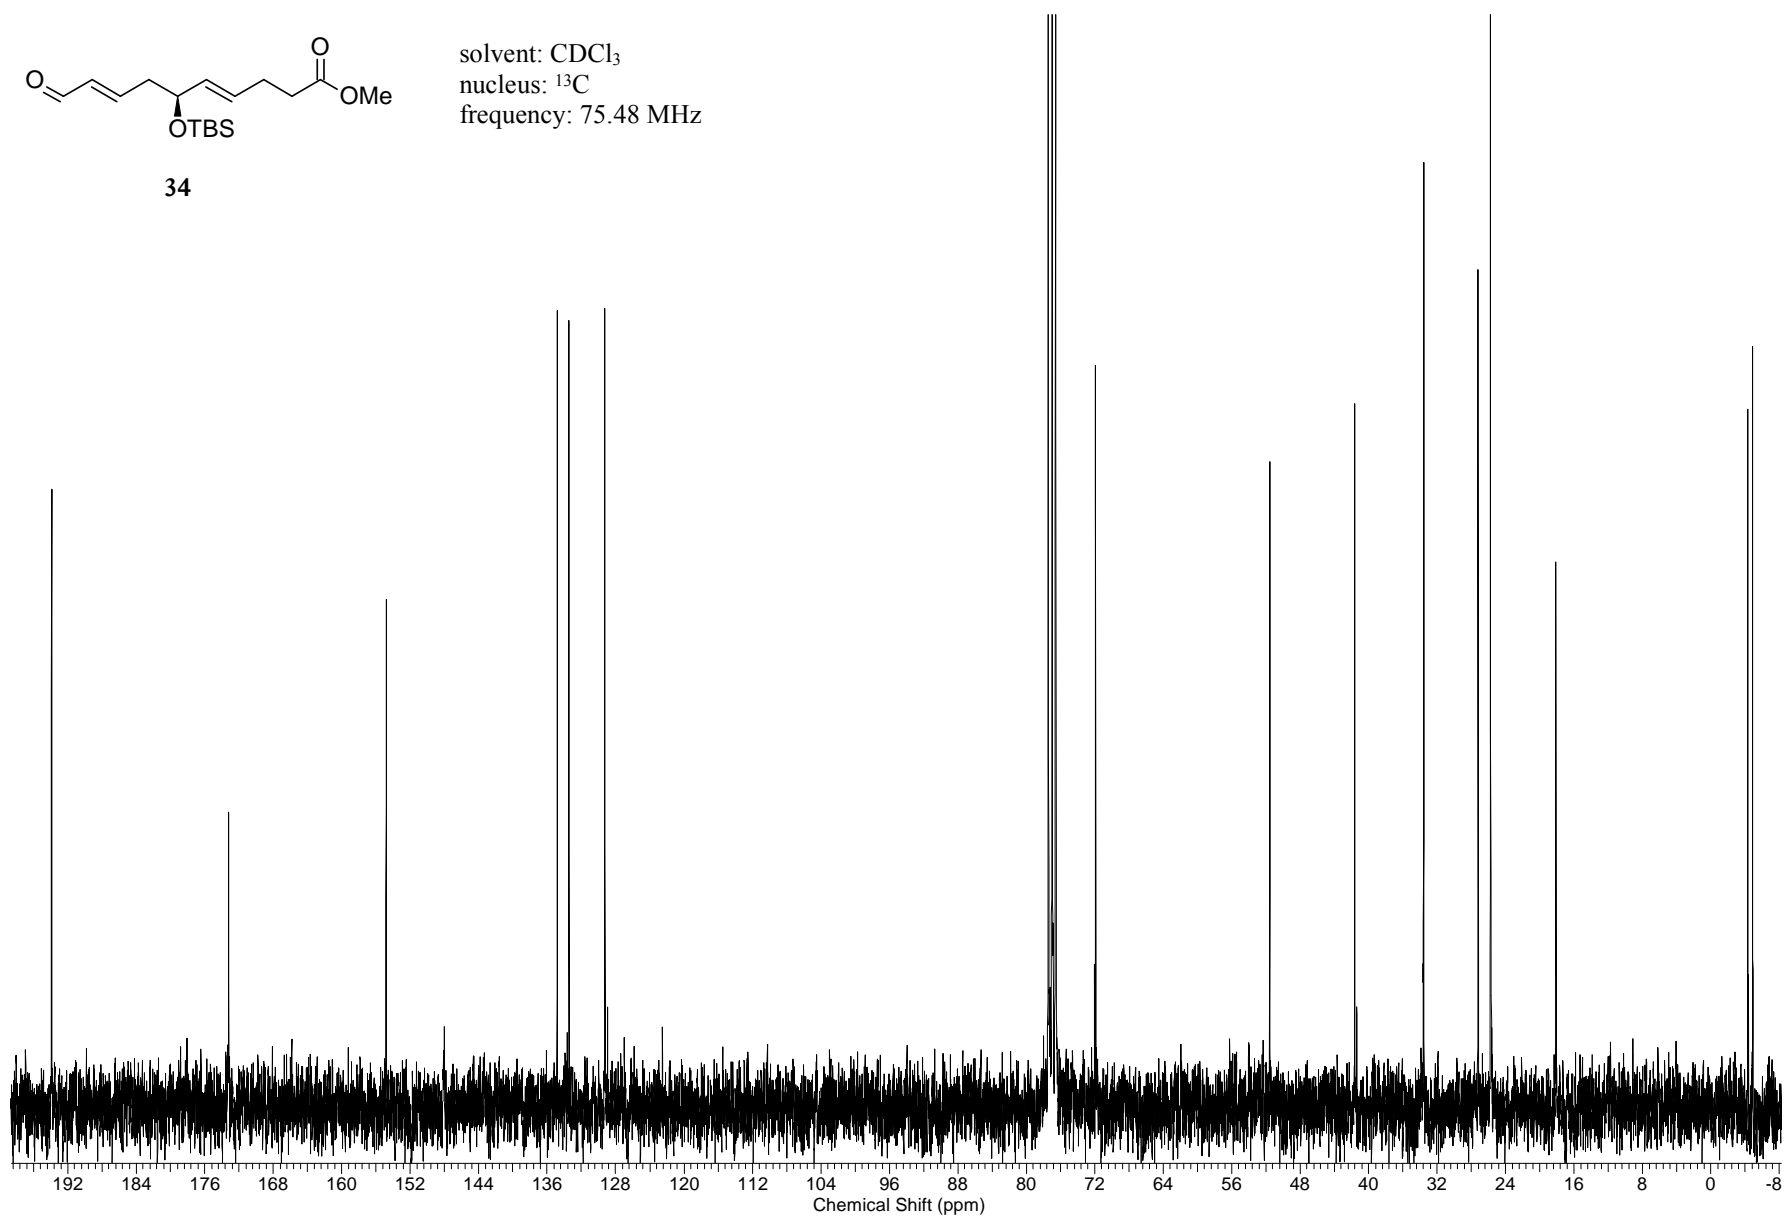





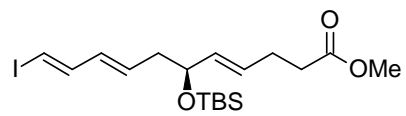

**19**

*E/Z* = 7:1

solvent: CDCl<sub>3</sub>  
nucleus: <sup>13</sup>C  
frequency: 75.48 MHz

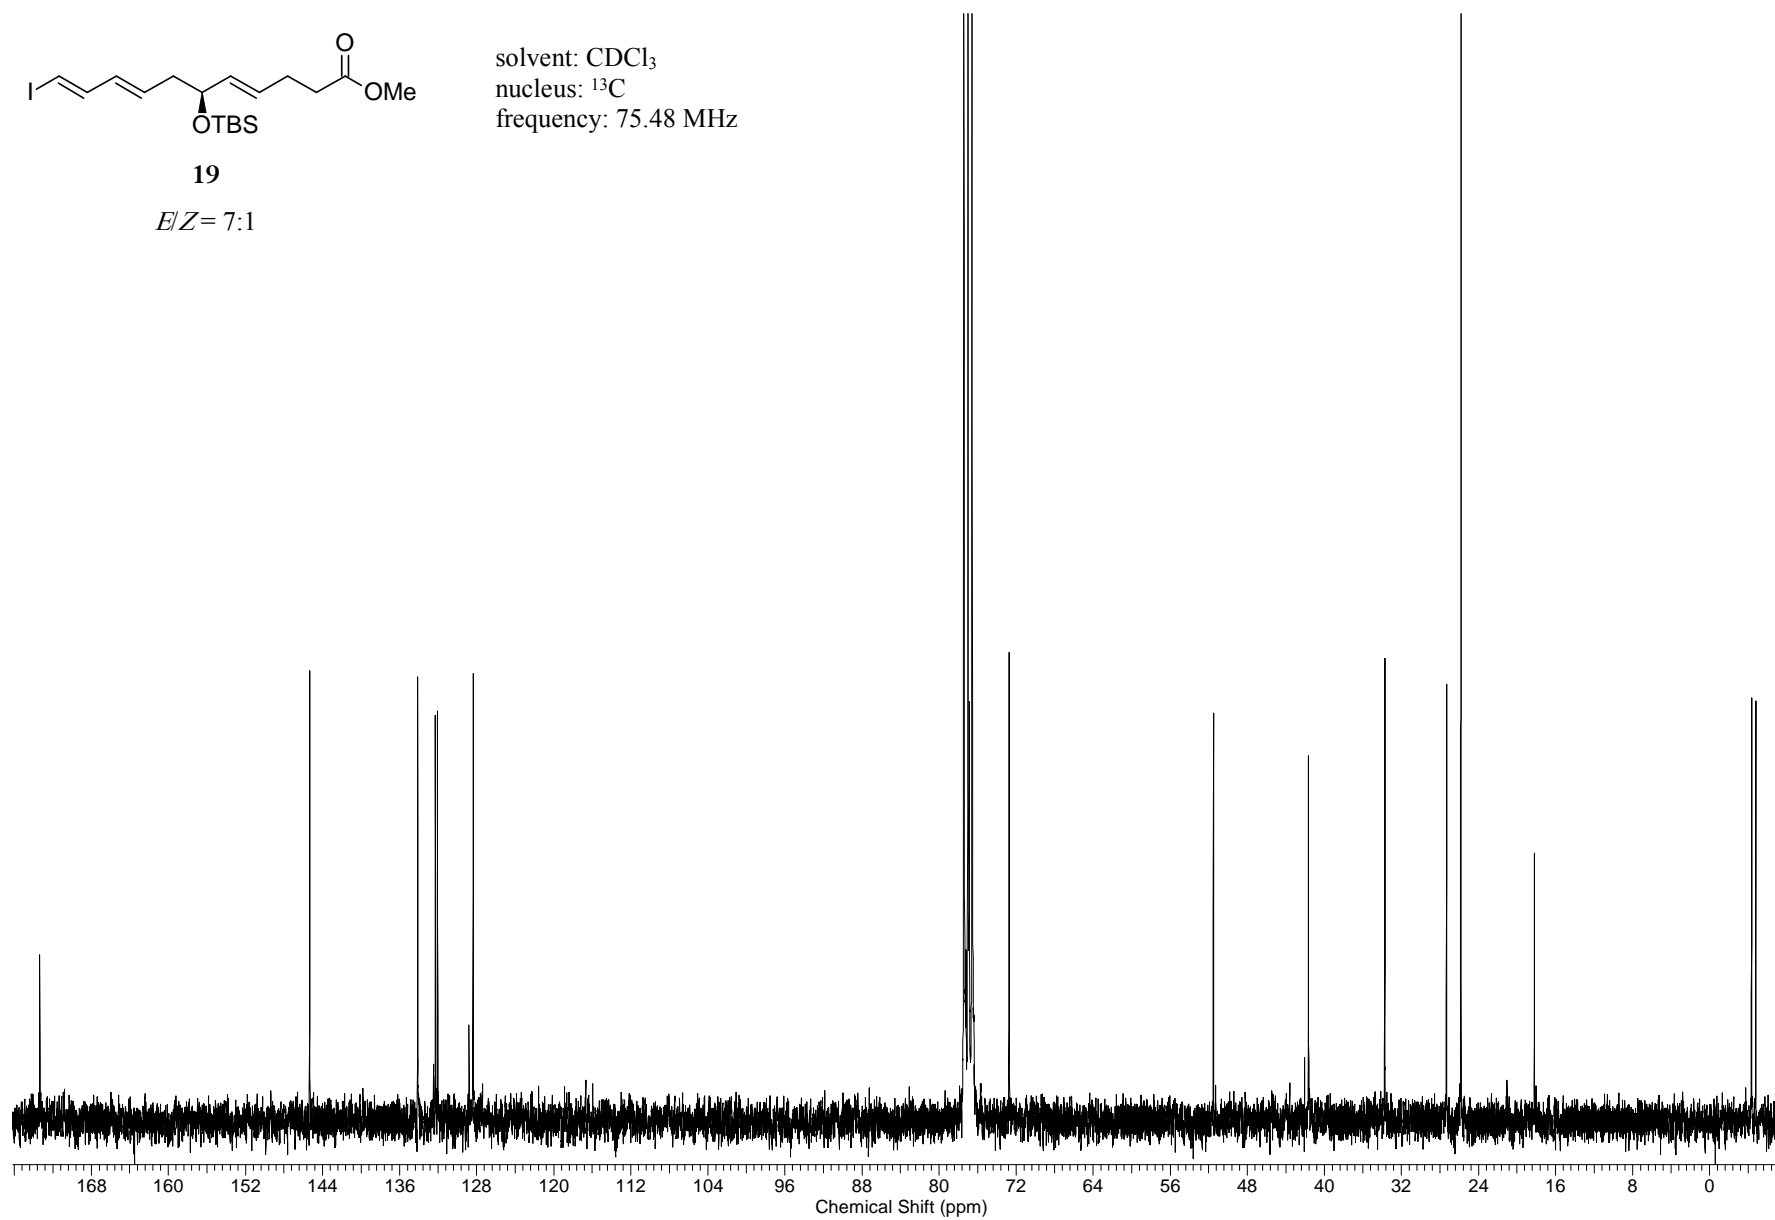

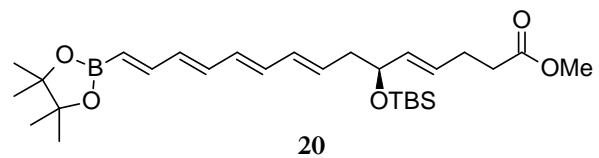

20

solvent: CDCl<sub>3</sub>  
nucleus: <sup>1</sup>H  
frequency: 600.130 MHz

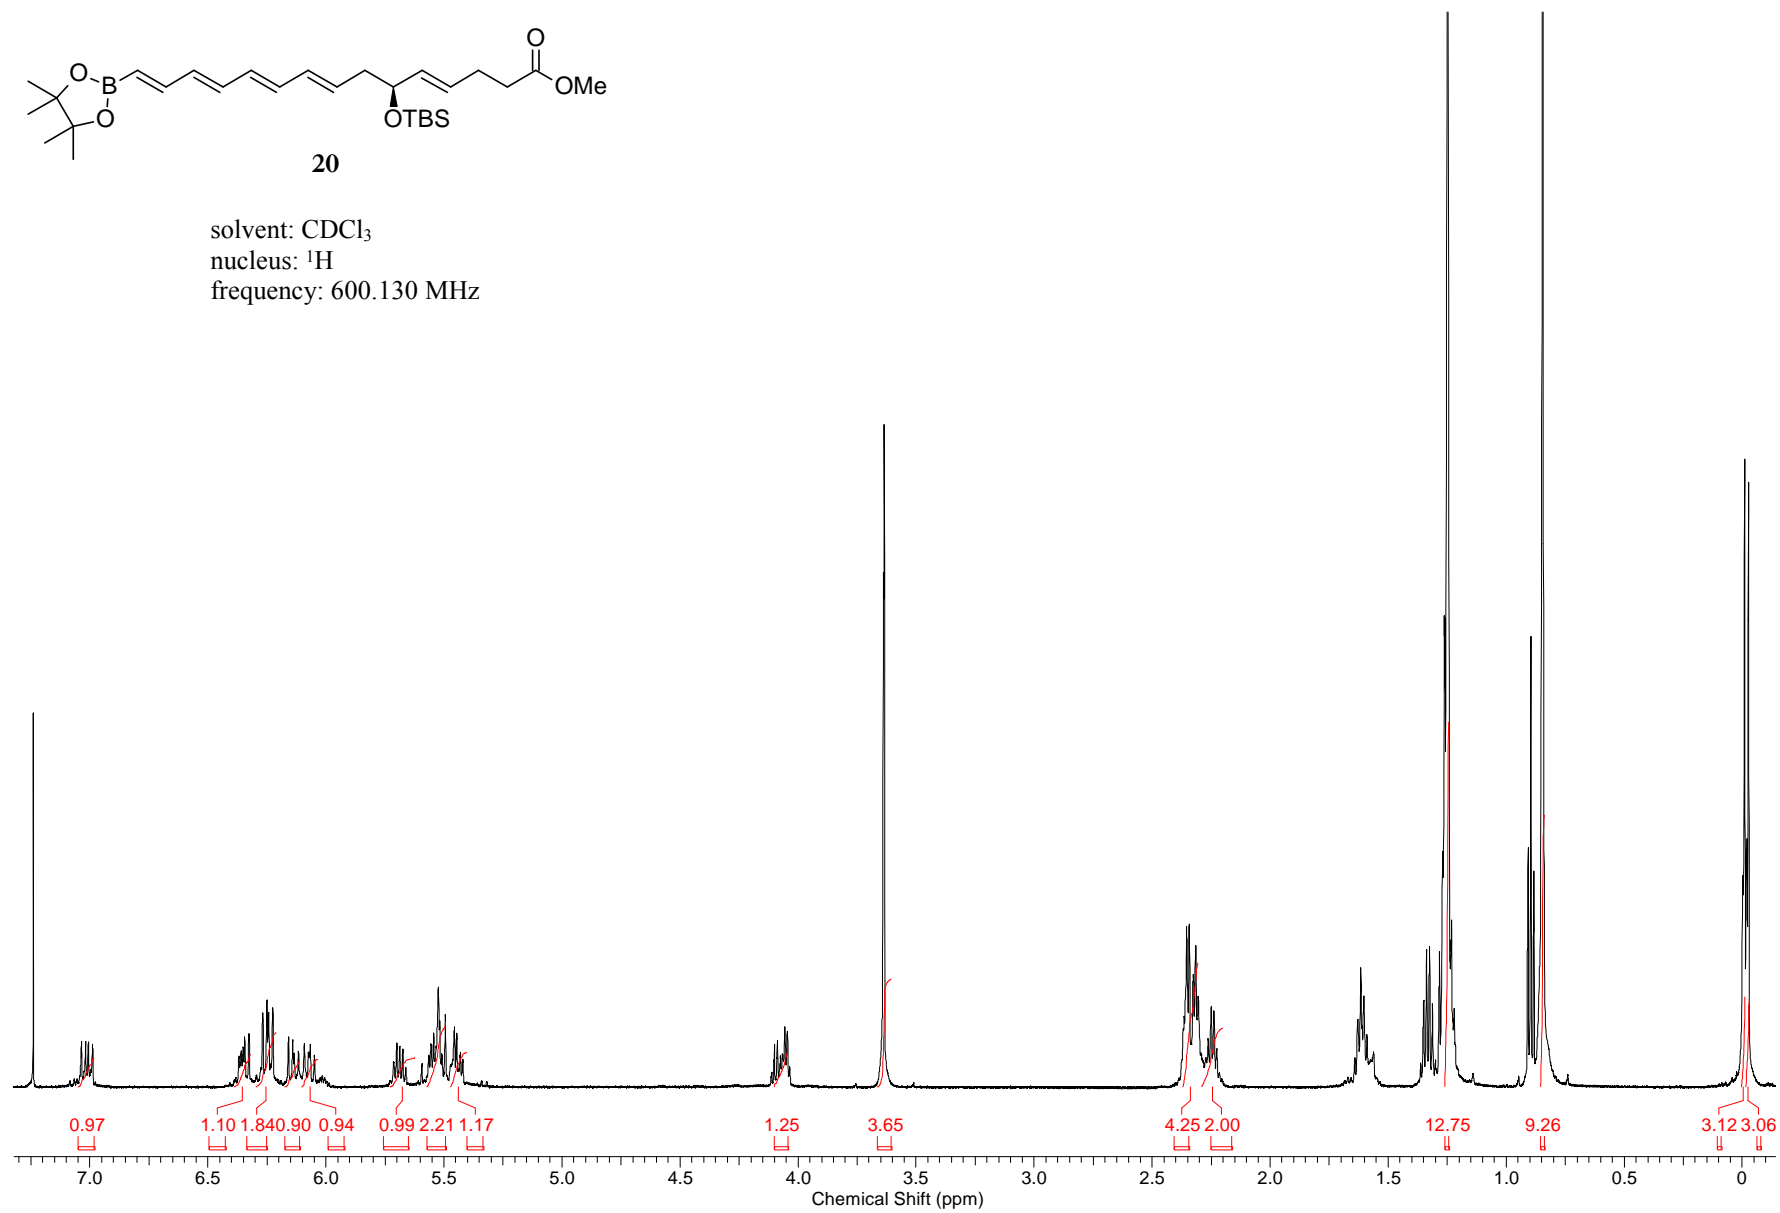

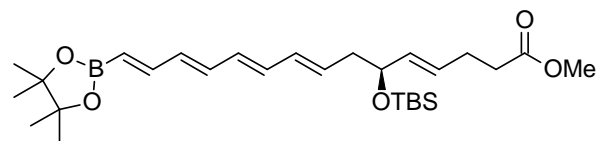

**20**

solvent: CDCl<sub>3</sub>

nucleus: <sup>13</sup>C

frequency: 75.48 MHz

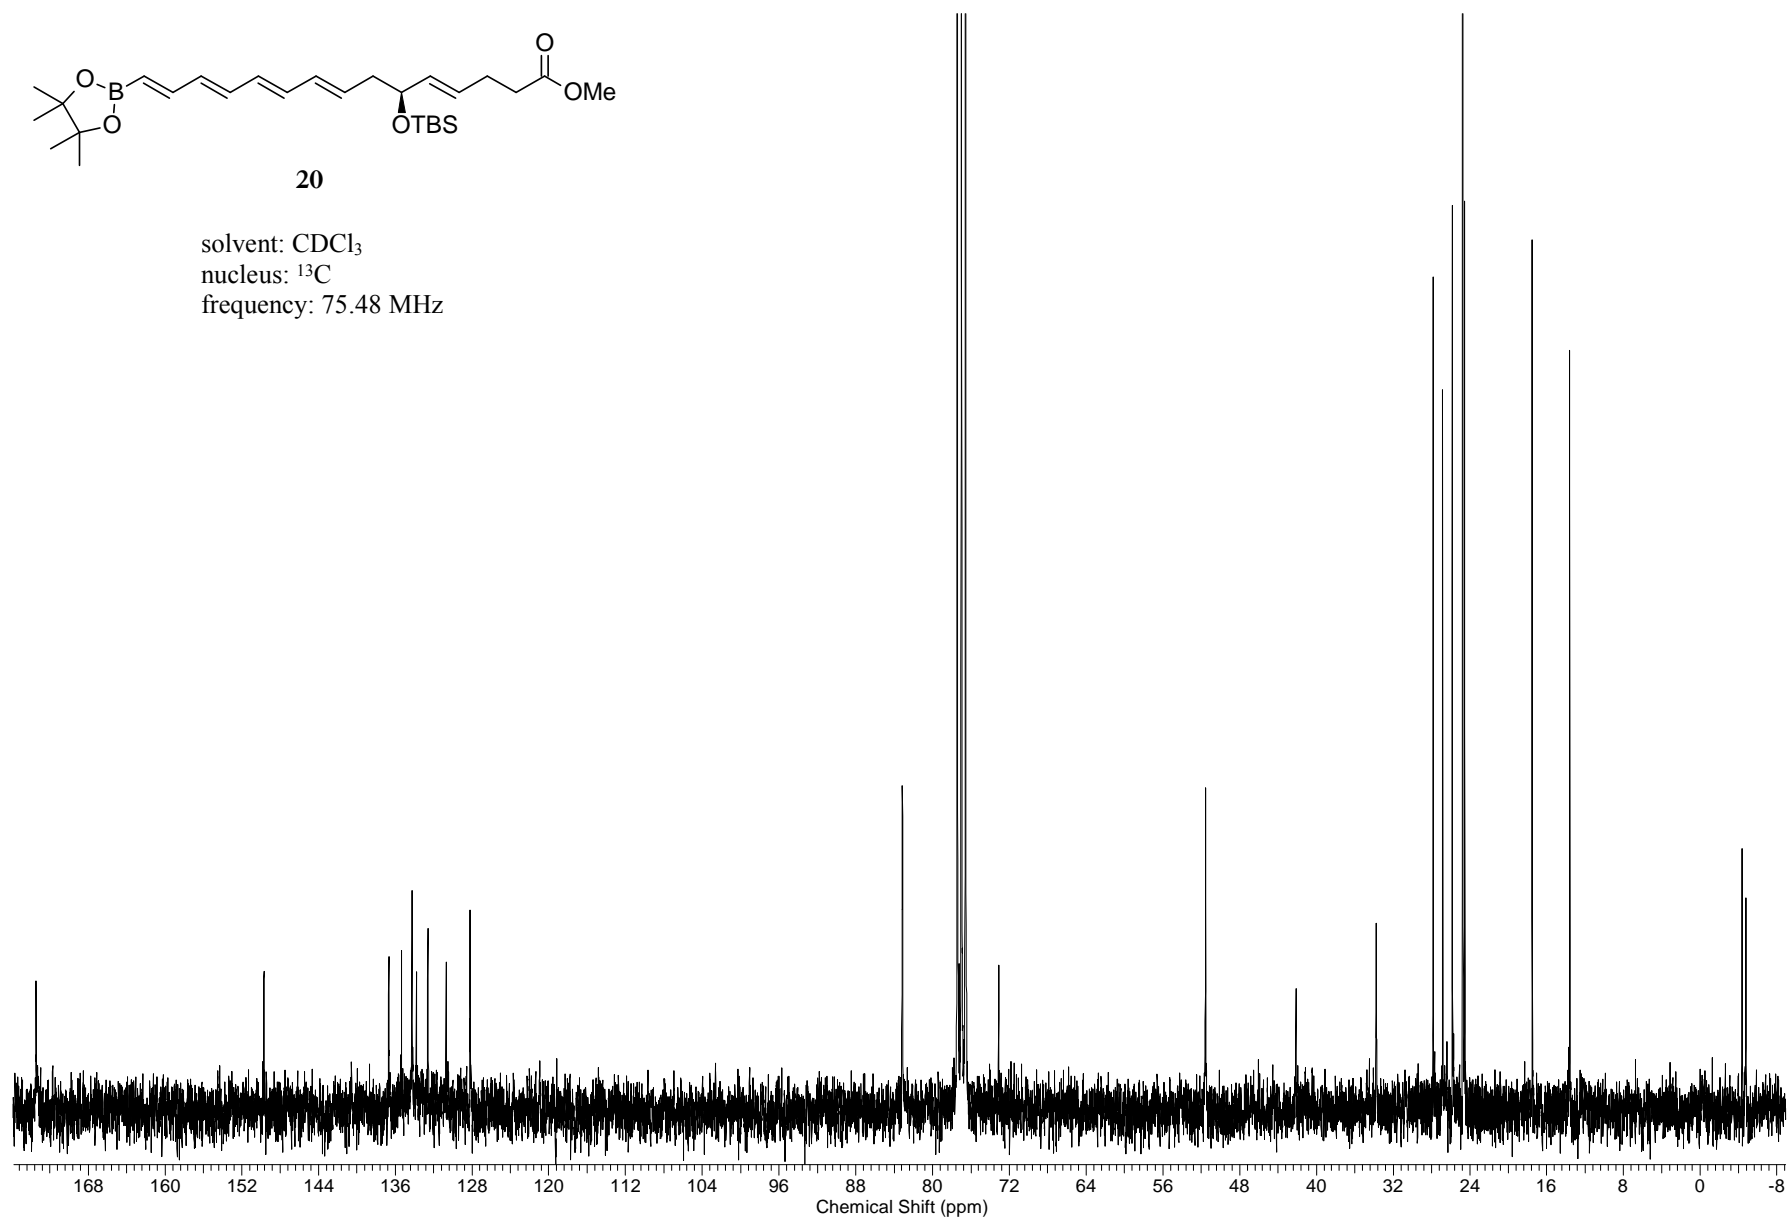

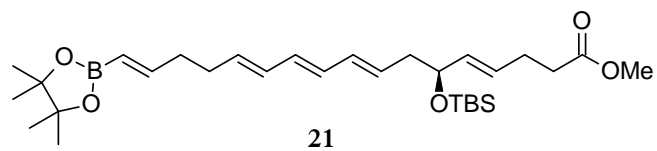

21

solvent: CDCl<sub>3</sub>  
nucleus: <sup>1</sup>H  
frequency: 300.132 MHz

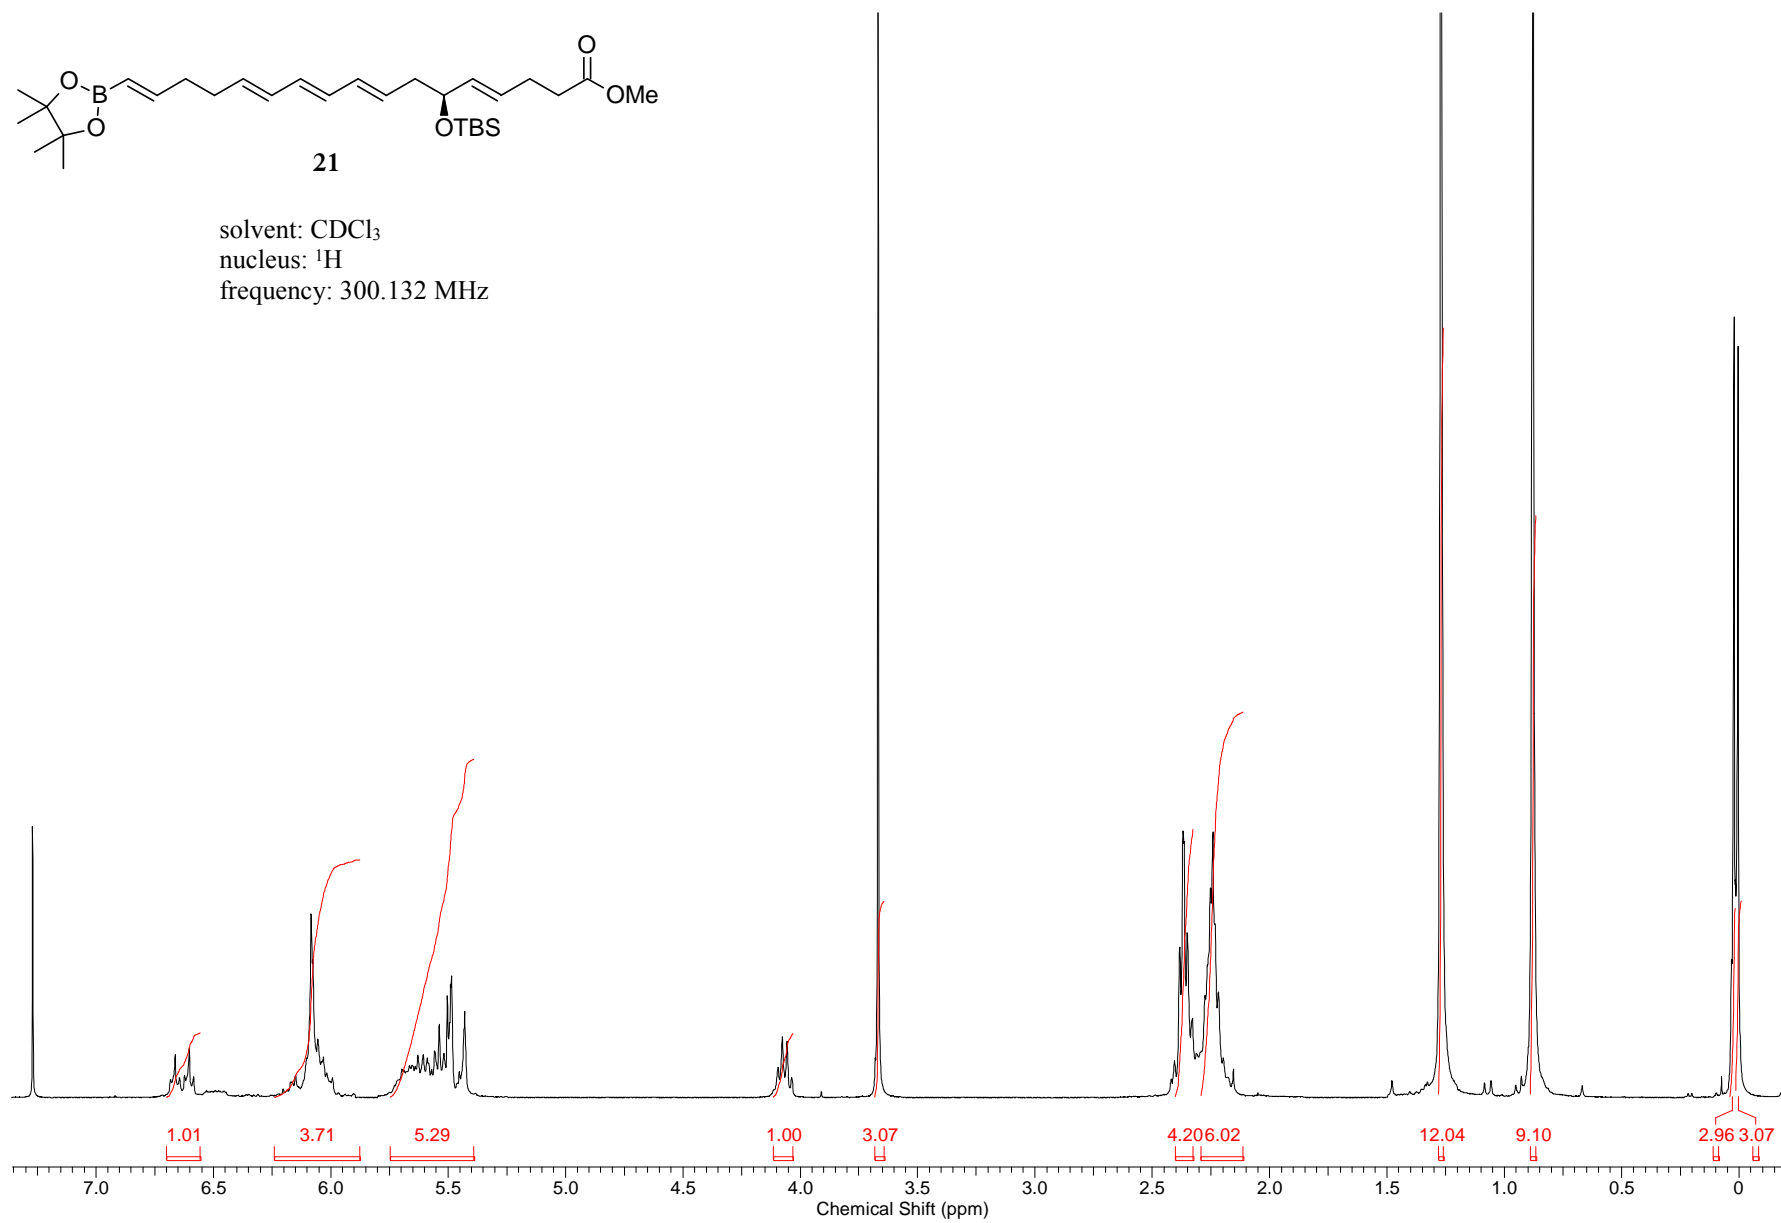

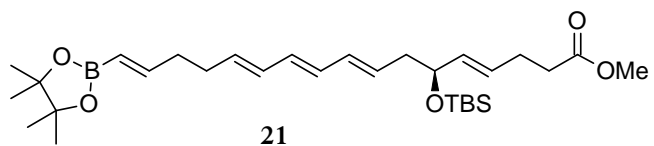

21

solvent: CDCl<sub>3</sub>

nucleus: <sup>13</sup>C

frequency: 75.48 MHz

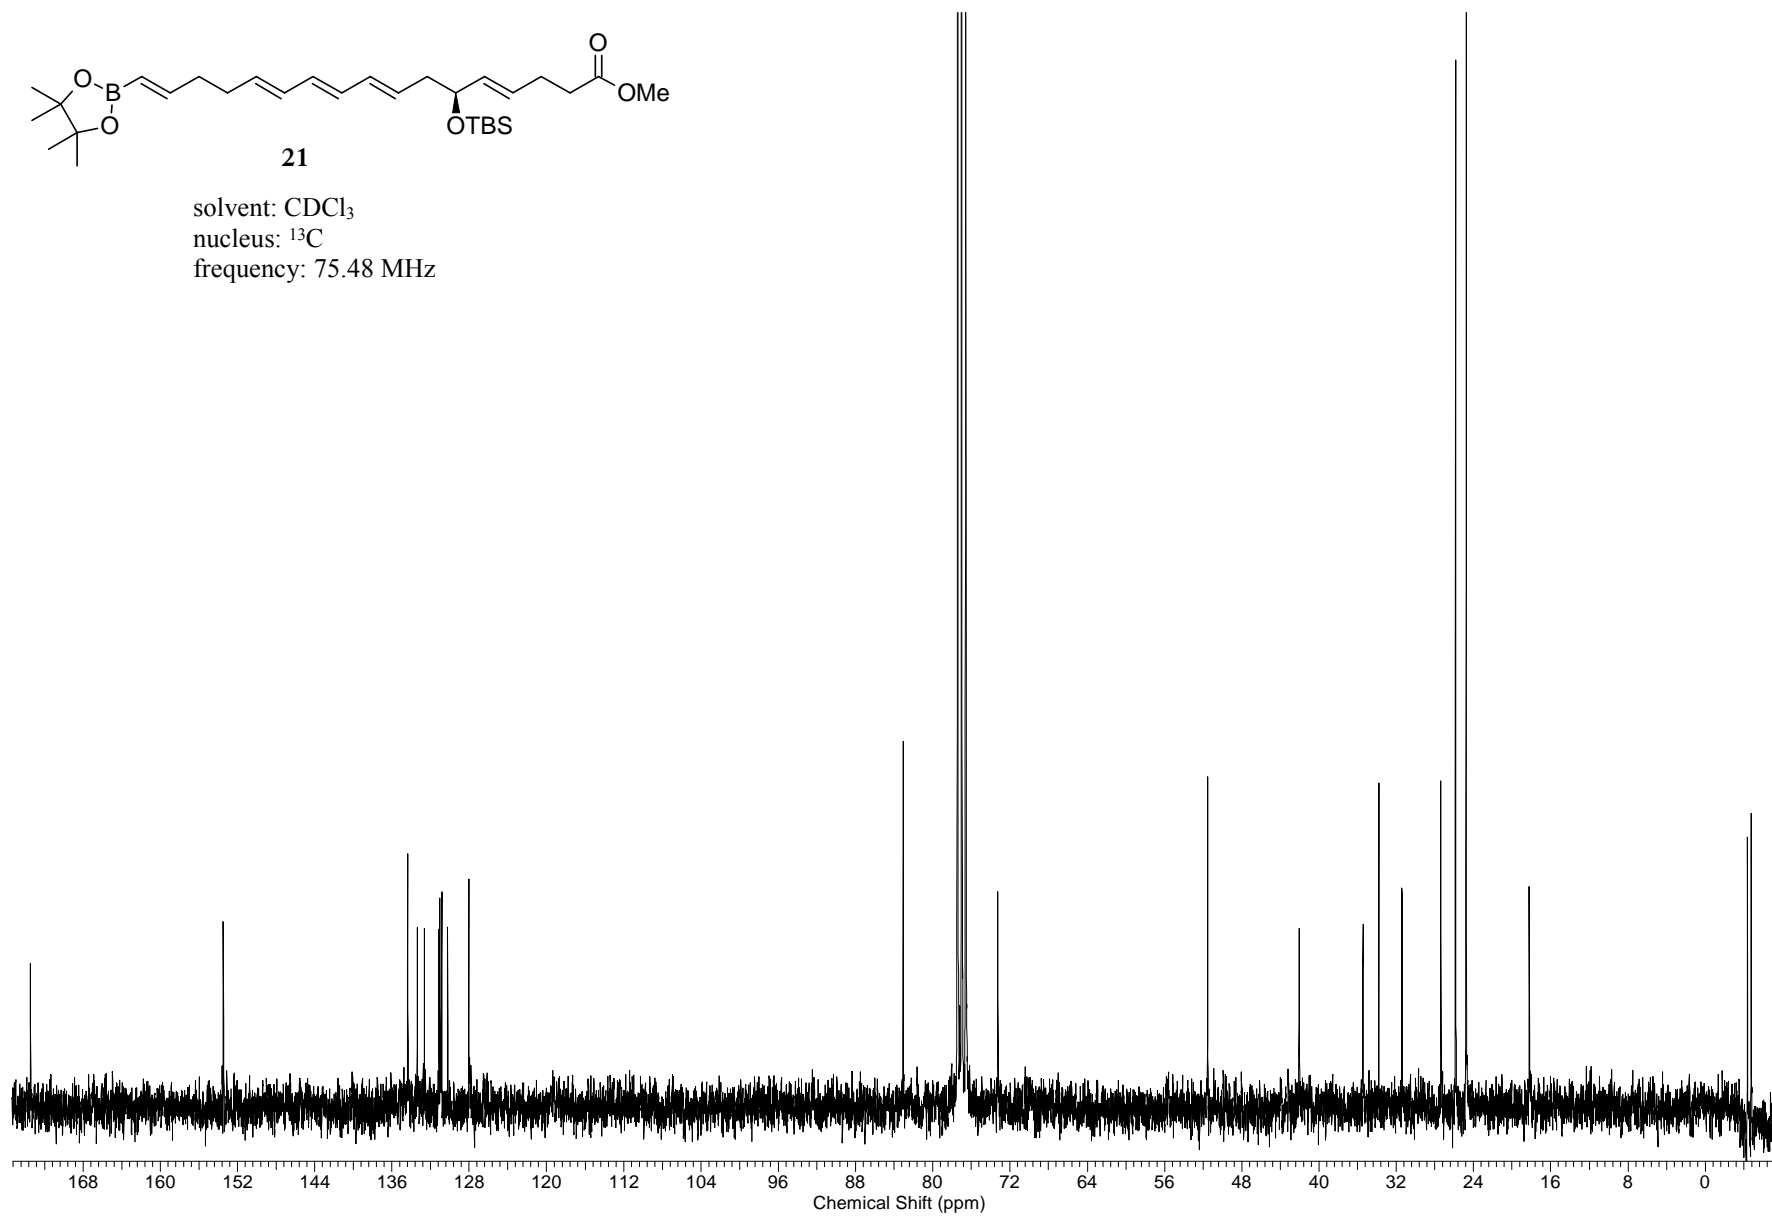

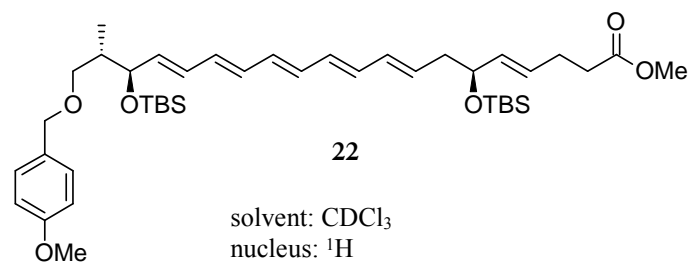

22

solvent: CDCl<sub>3</sub>  
nucleus: <sup>1</sup>H  
frequency: 500.132 MHz

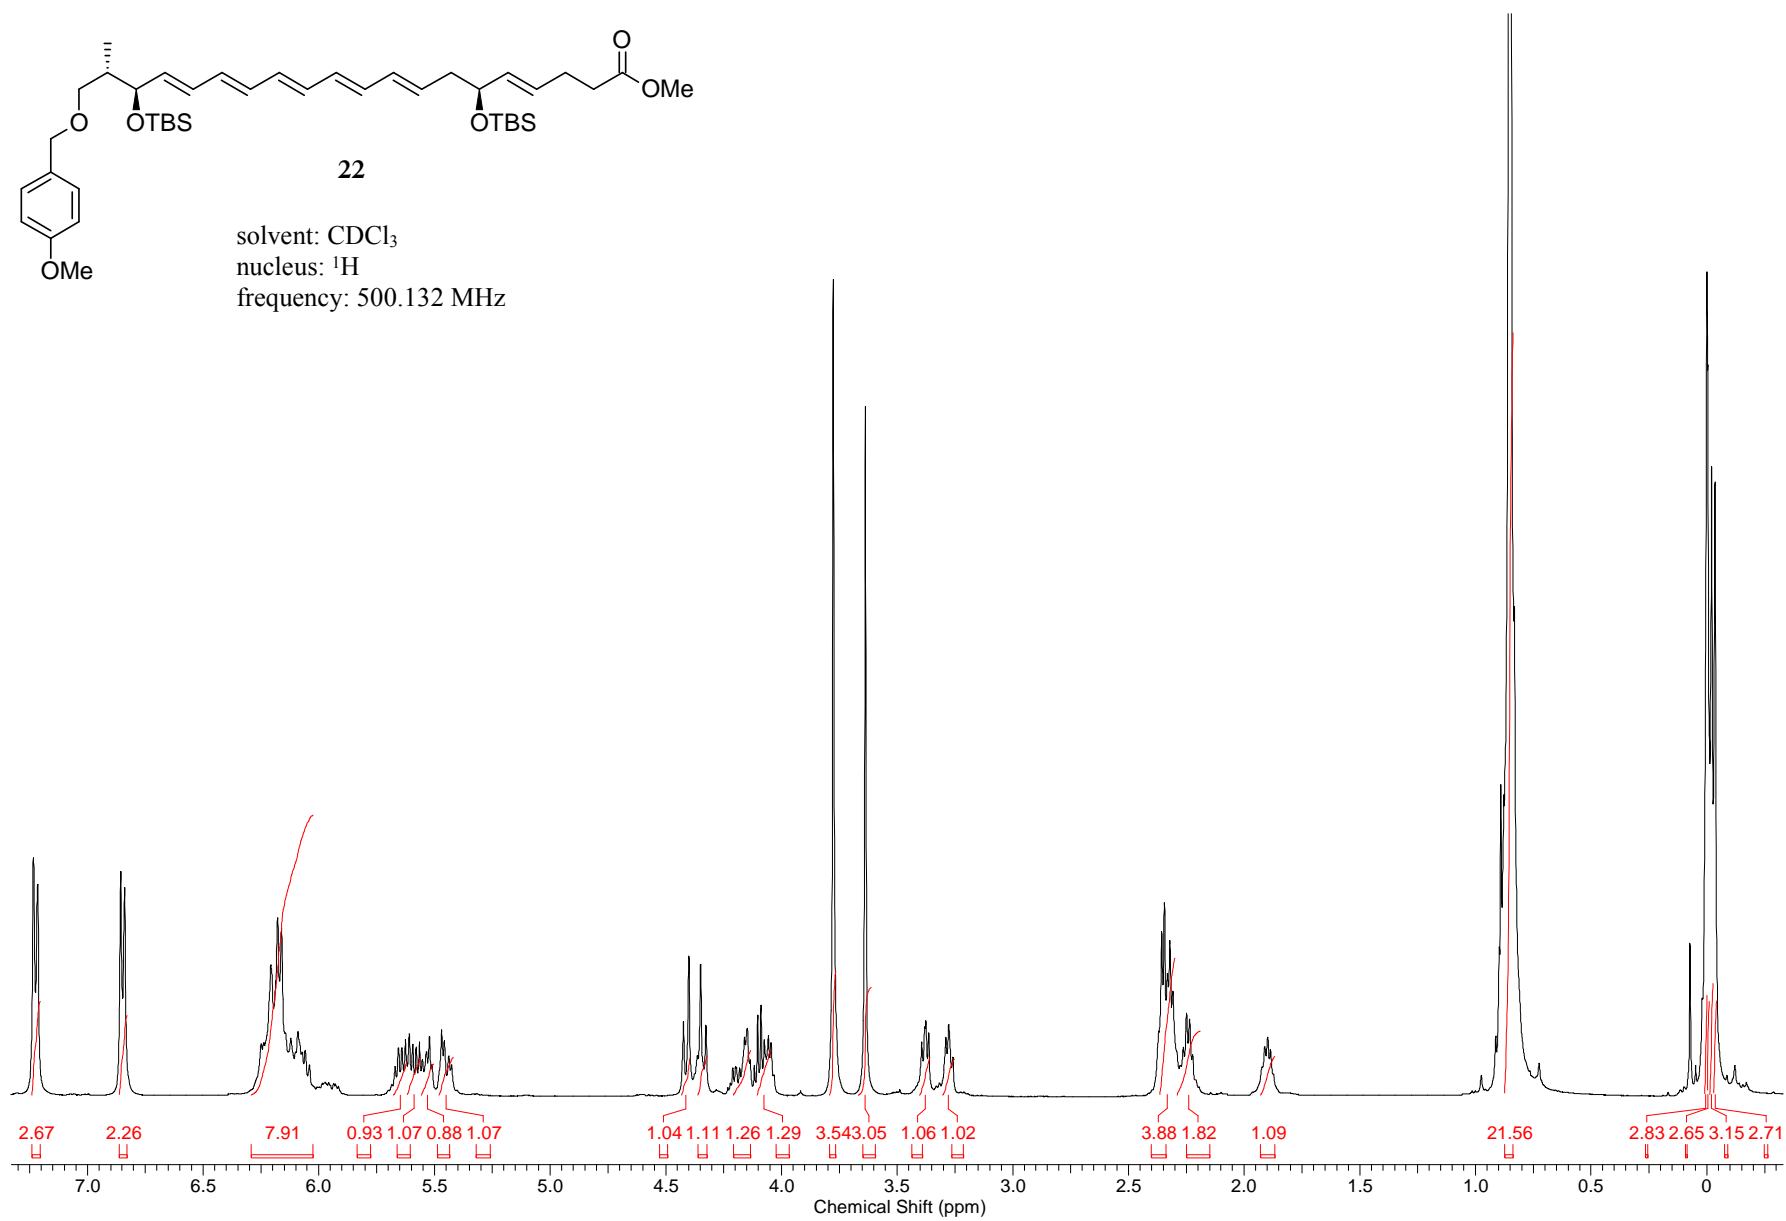

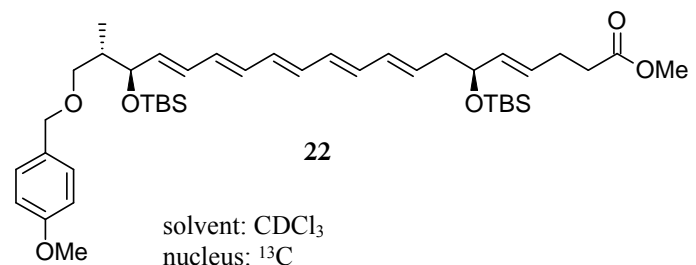

solvent: CDCl<sub>3</sub>  
nucleus: <sup>13</sup>C  
frequency: 125.76 MHz

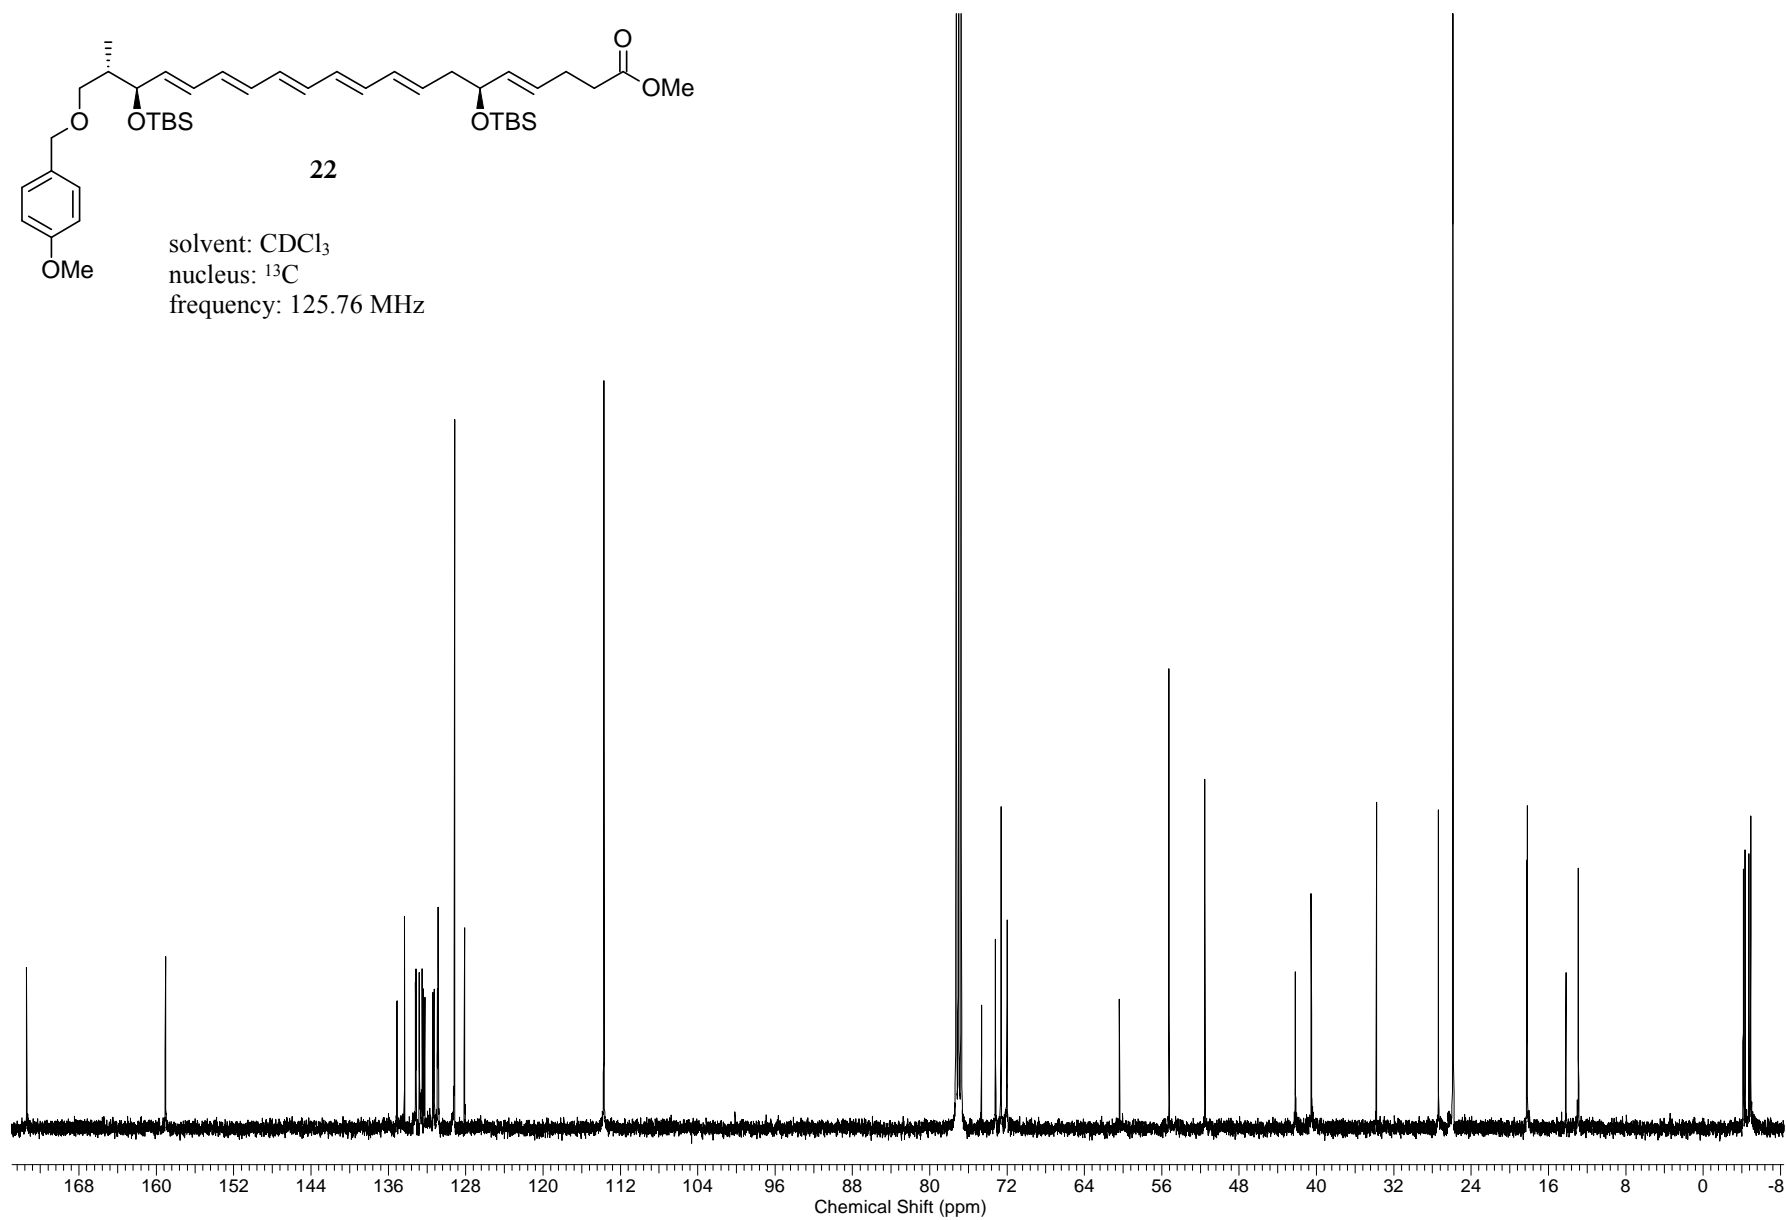



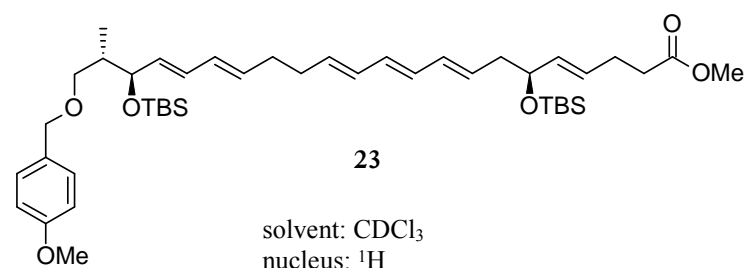

23

solvent: CDCl<sub>3</sub>  
nucleus: <sup>1</sup>H  
frequency: 600.130 MHz

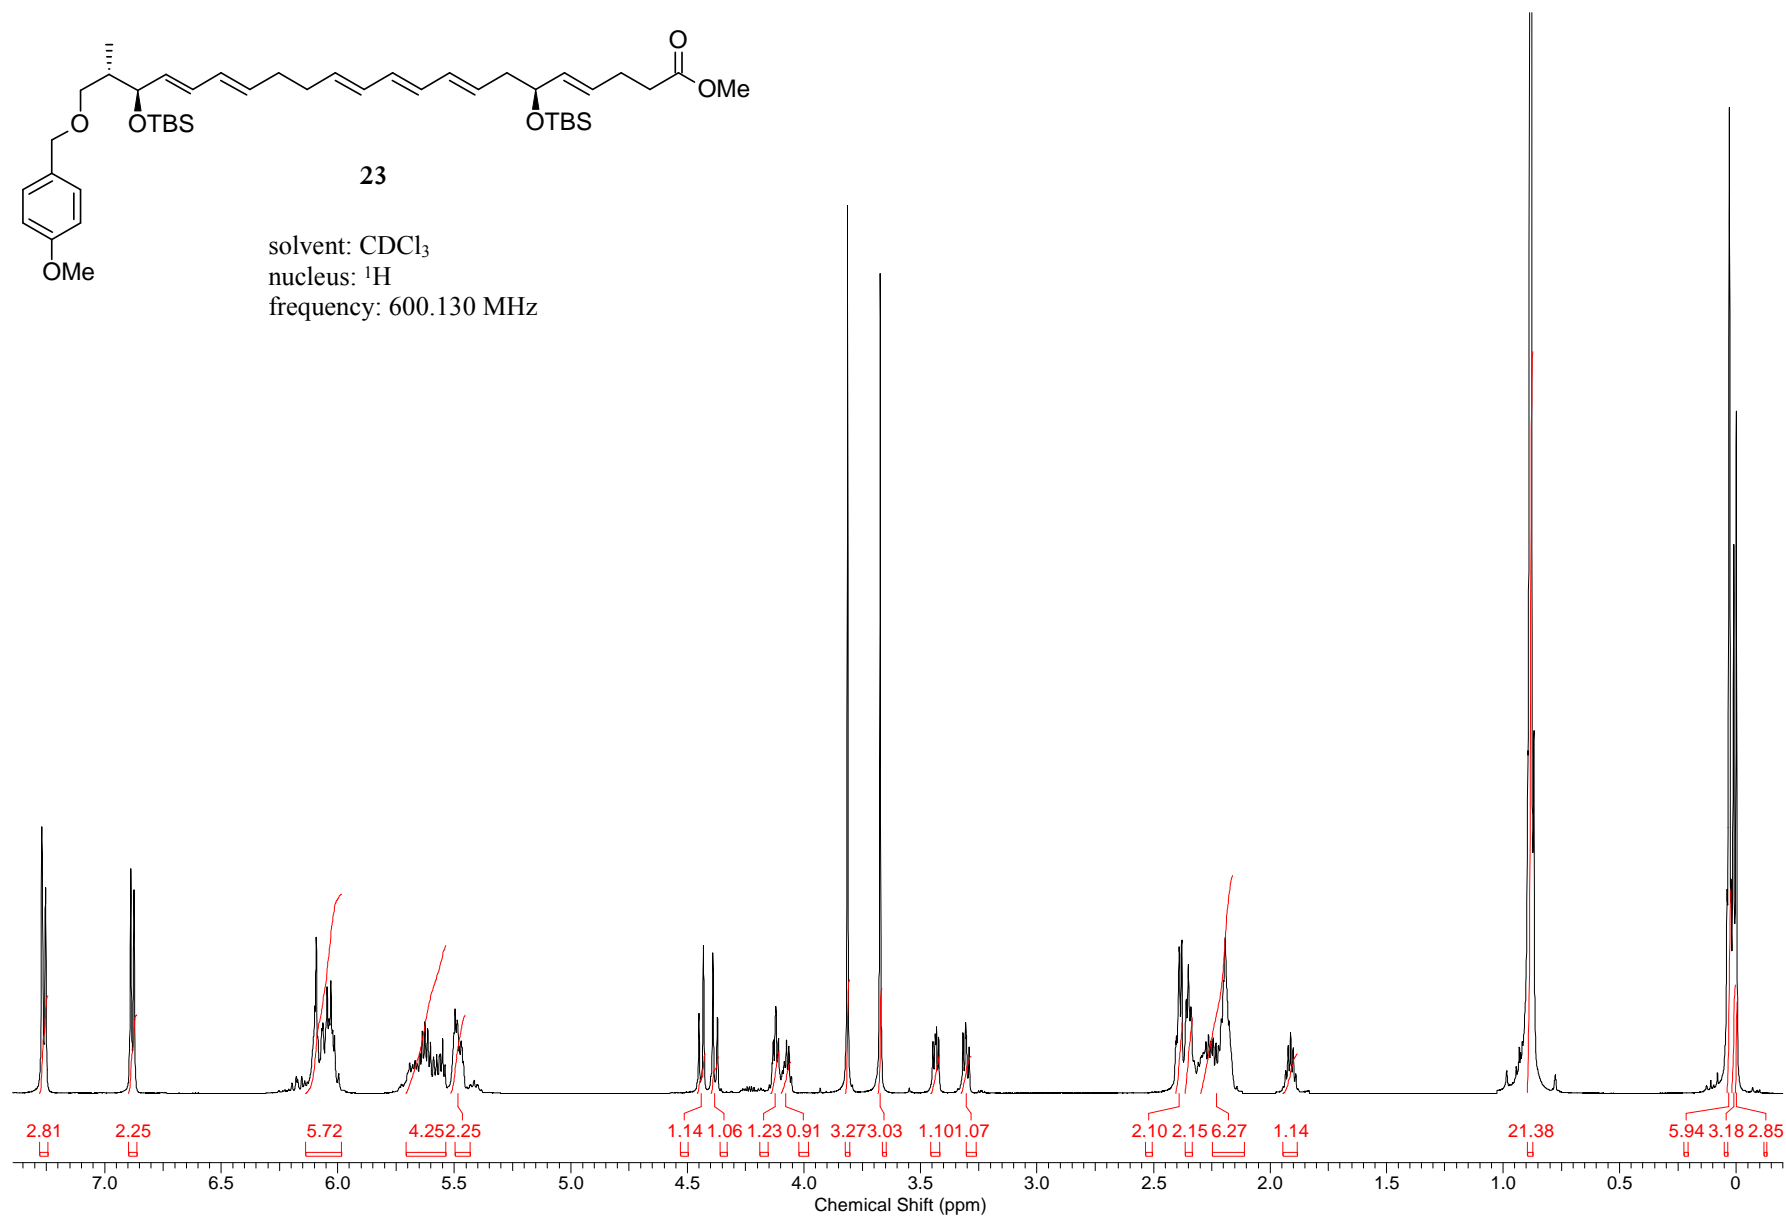

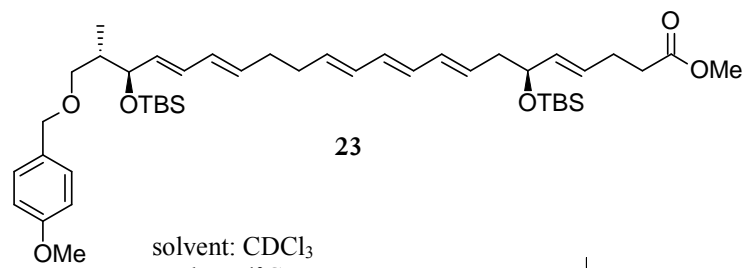

solvent: CDCl<sub>3</sub>  
nucleus: <sup>13</sup>C  
frequency: 150.90 MHz

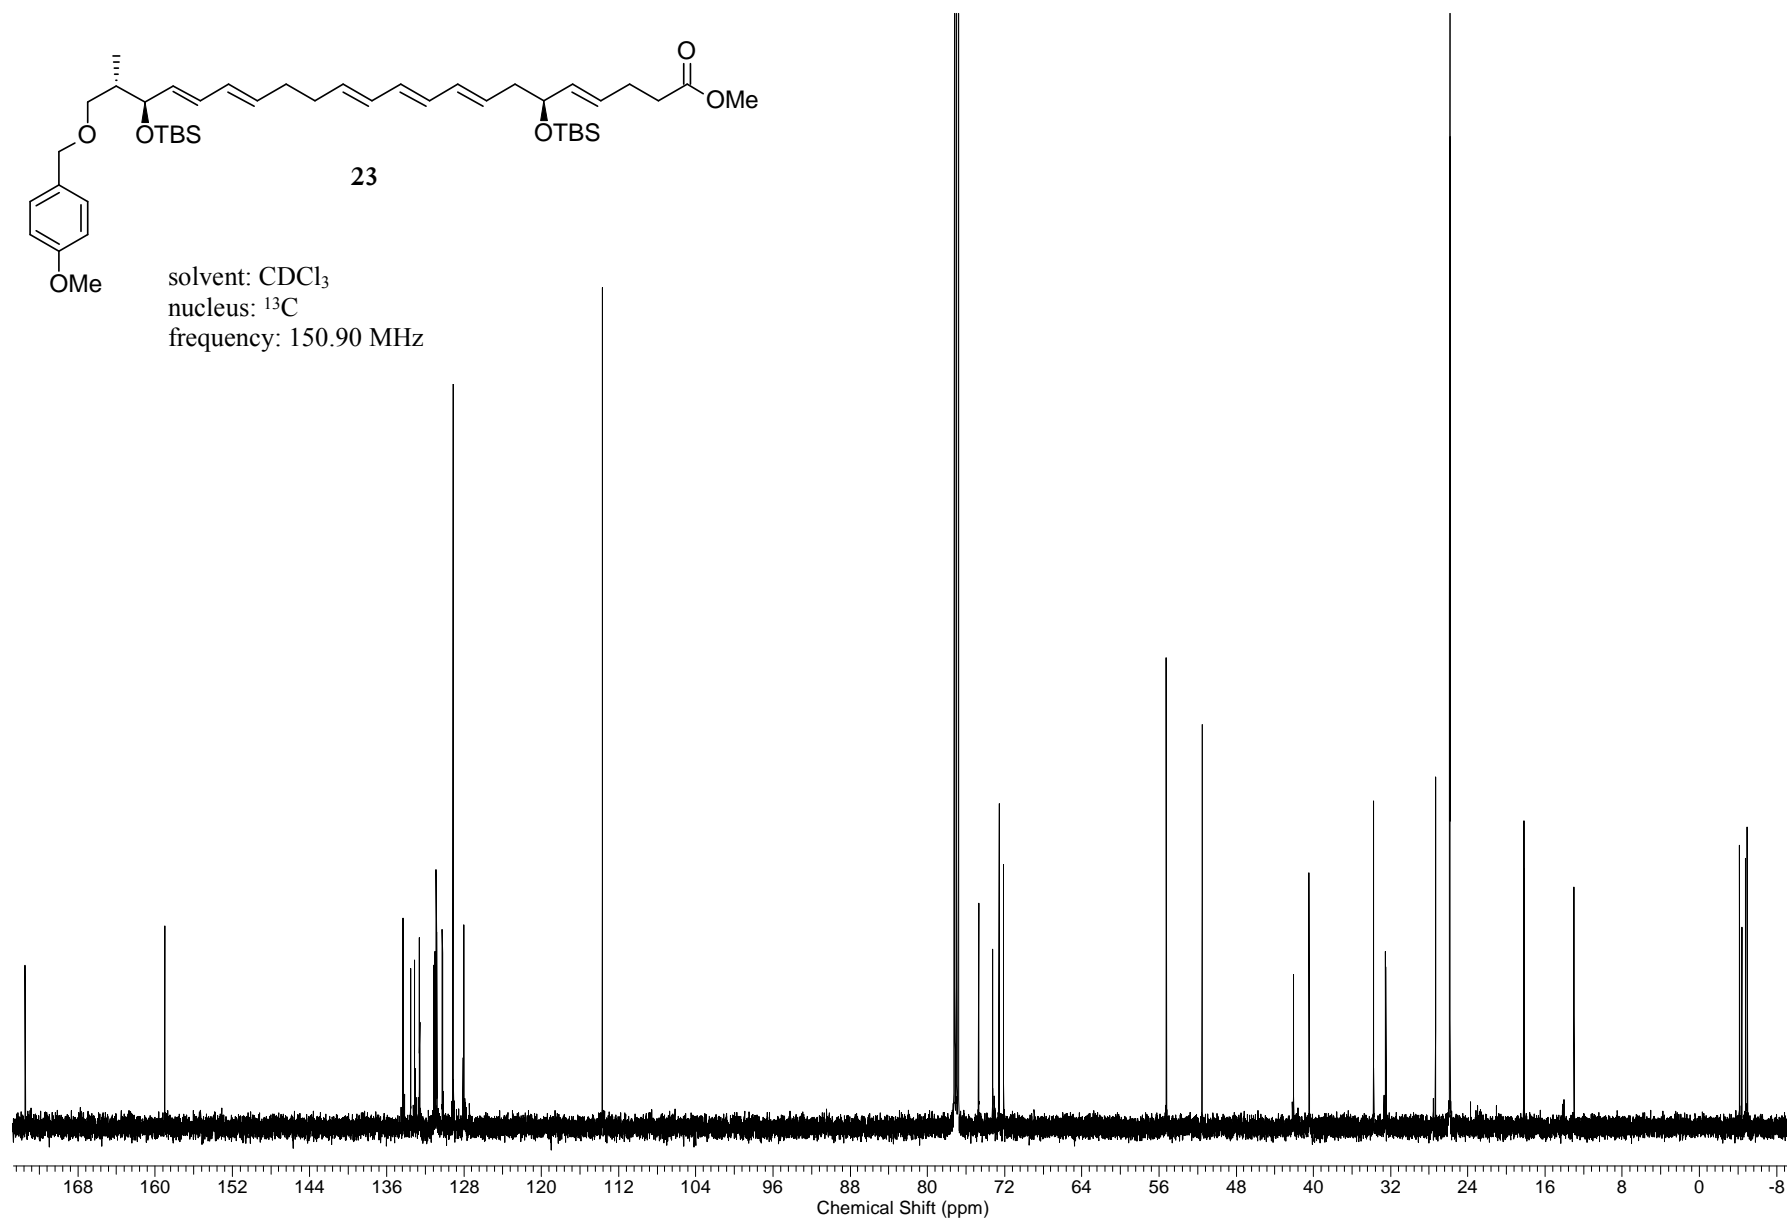

Supplement: c2cc34052f.pdf [file c2cc34052f.pdf]
